# Supplementary material for: Conserved pathway for homarine catabolism in environmental bacteria
Source: Research Square preprint supplement (doi:10.21203/rs.3.rs-7359689/v1), 2025-08-21
Supplement: Supplementary file 1 [file ba78013a87c709021f125c92.xlsx]

## Sheet: S1
Table S1: Cobetia sp. OBi1 genome sequencing and assembly summary
Illumina read pairs	4032736
Illumina bases	1063009521
Nanopore reads	40904
Nanopore bases	437436559
Predicted proteins	3536
Average length	346.7559 aa
Coding density	85.0592 %
Complete ssu	7
Max ssu length	1536
Contigs	1
Total length	4,324,504 bp
G+C content	0.6213
G-C skew	0.0008
A-T skew	0.0002

## Sheet: S2
Table S2: Differential gene expression results from transcriptomics experiment of Cobetia sp. OBi1 grown in glucose + homarine vs glucose and homarine vs glucose.
Gene Annotation							Homarine vs Glucose statistics						Glucose + Homarine vs Glucose statistics						padj < 0.05 in both treatments
locus_tag	gene_id	start	end	strand	protein.length	product	baseMean	log2FoldChange	lfcSE	stat	pvalue	padj	baseMean	log2FoldChange	lfcSE	stat	pvalue	padj
ACFLL8_01300		280427	281203	+	259	formate dehydrogenase accessory sulfurtransferase FdhD	1867.71	2.49462	0.195268	7.65419	1.9453e-14	5.42367e-13	1867.71	1.70684	0.19611	3.60432	0.00031297	0.0281913	TRUE
ACFLL8_04820		1122496	1122699	-	68	cold-shock protein	29872.6	2.88519	0.199666	9.44176	3.66579e-21	1.86637e-19	29872.6	1.74409	0.199736	3.72536	0.00019503	0.0180304	TRUE
ACFLL8_06060		1396737	1397789	-	351	YeiH family protein	2267.83	-5.92262	0.420386	-11.7098	1.13611e-31	1.42542e-29	2267.83	-2.60132	0.411055	-3.89564	9.79406e-05	0.00983044	TRUE
ACFLL8_07290	SoxG-like	1706773	1707474	-	234	hypothetical protein	2390.55	2.56975	0.478004	3.28396	0.00102359	0.00699513	2390.55	5.0982	0.477339	8.58551	9.04364e-18	2.26931e-15	TRUE
ACFLL8_07295	SoxA-like	1707476	1710484	-	1003	2Fe-2S iron-sulfur cluster-binding protein	10112.5	3.43964	0.41053	5.94266	2.80434e-09	4.69126e-08	10112.5	5.64783	0.41039	11.3254	9.8231e-30	3.45086e-27	TRUE
ACFLL8_07300	SoxD-like	1710481	1710792	-	104	sarcosine oxidase subunit delta	846.384	3.72016	0.435812	6.24159	4.33134e-10	7.925e-09	846.384	5.9034	0.434274	11.291	1.45309e-29	4.64065e-27	TRUE
ACFLL8_07305	SoxB-like	1710888	1712129	-	414	FAD-dependent oxidoreductase	4118.61	3.68768	0.286767	9.37237	7.09232e-21	3.55933e-19	4118.61	5.85293	0.286294	16.9509	1.89578e-64	8.32483e-62	TRUE
ACFLL8_07310	folD	1712168	1713115	-	316	bifunctional methylenetetrahydrofolate dehydrogenase/methenyltetrahydrofolate cyclohydrolase FolD	3474.85	4.21578	0.275517	11.6718	1.77625e-31	2.15172e-29	3474.85	5.77398	0.275187	17.3481	2.03713e-67	1.19274e-64	TRUE
ACFLL8_07315	purU	1713235	1714113	-	293	formyltetrahydrofolate deformylase	12417.8	5.79972	0.169403	28.3332	1.34771e-176	4.7345e-173	12417.8	5.80107	0.169443	28.3345	1.30103e-176	4.57051e-173	TRUE
ACFLL8_07530		1758019	1759263	+	415	MFS transporter	2454.95	4.18028	0.224904	14.1406	2.13496e-45	5.00008e-43	2454.95	2.28034	0.226201	5.66017	1.51223e-08	2.65623e-06	TRUE
ACFLL8_07535		1759404	1761368	+	655	bifunctional 2%27%2C3%27-cyclic-nucleotide 2%27-phosphodiesterase/3%27-nucleotidase	2926.25	3.46165	0.238611	10.3166	5.93063e-25	3.931e-23	2926.25	1.82727	0.239475	3.4545	0.00055131	0.0450407	TRUE
ACFLL8_08720		2049887	2050279	-	131	ectoine synthase	1735.59	-2.64543	0.393765	-4.17871	2.9317e-05	0.00027538	1735.59	-3.71743	0.396516	-6.85325	7.21901e-12	1.58502e-09	TRUE
ACFLL8_08725	ectB	2050512	2051774	-	421	diaminobutyrate--2-oxoglutarate transaminase	9399.02	-3.41271	0.278932	-8.64981	5.15854e-18	2.05931e-16	9399.02	-3.61426	0.279264	-9.36125	7.88021e-21	2.12948e-18	TRUE
ACFLL8_08730	ectA	2052034	2052591	-	186	diaminobutyrate acetyltransferase	3323.96	-2.03671	0.180453	-5.74505	9.18959e-09	1.42216e-07	3323.96	-4.16626	0.186229	-17.002	7.93939e-65	3.98444e-62	TRUE
ACFLL8_08975	flgJ	2113390	2114799	-	470	flagellar assembly peptidoglycan hydrolase FlgJ	581.197	2.11158	0.23869	4.65699	3.2086e-06	3.54459e-05	581.197	2.04481	0.239489	4.36266	1.28493e-05	0.00155654	TRUE
ACFLL8_08980		2114799	2115935	-	379	flagellar basal body P-ring protein FlgI	405.685	2.31686	0.270208	4.87353	1.09624e-06	1.29667e-05	405.685	2.2094	0.271298	4.45784	8.27899e-06	0.00103872	TRUE
ACFLL8_08985		2116005	2116643	-	213	flagellar basal body L-ring protein FlgH	326.805	2.00191	0.240199	4.17118	3.03028e-05	0.00028388	326.805	1.99573	0.241421	4.12443	3.71652e-05	0.00408004	TRUE
ACFLL8_08990	flgG	2116756	2117538	-	261	flagellar basal-body rod protein FlgG	1053.99	3.3489	0.270523	8.68281	3.86125e-18	1.57728e-16	1053.99	2.58595	0.271526	5.8409	5.19203e-09	1.01331e-06	TRUE
ACFLL8_08995		2117568	2118335	-	256	flagellar basal body rod protein FlgF	514.57	2.72078	0.404959	4.24927	2.14466e-05	0.00020813	514.57	2.40959	0.405768	3.47388	0.00051299	0.0429078	TRUE
ACFLL8_09000	flgE	2118460	2119719	-	420	flagellar hook protein FlgE	1277.97	2.83011	0.331203	5.52563	3.28305e-08	4.78563e-07	1277.97	2.27058	0.331757	3.82985	0.00012822	0.0125125	TRUE
ACFLL8_09005		2119849	2120541	-	231	flagellar hook assembly protein FlgD	552.21	3.39286	0.271267	8.82103	1.13414e-18	4.85883e-17	552.21	2.49857	0.273432	5.48061	4.23867e-08	7.09069e-06	TRUE
ACFLL8_09695	maiA	2280946	2281596	-	217	maleylacetoacetate isomerase	166.712	-2.01593	0.265146	-3.83157	0.00012733	0.00103544	166.712	-2.02522	0.270988	-3.78328	0.00015478	0.0146953	TRUE
ACFLL8_09700		2281742	2282761	-	340	fumarylacetoacetate hydrolase family protein	422.075	-3.61899	0.254416	-10.2941	7.49125e-25	4.69942e-23	422.075	-2.1114	0.242662	-4.58001	4.64943e-06	0.00060494	TRUE
ACFLL8_09705	hmgA	2282837	2284150	-	438	homogentisate 1%2C2-dioxygenase	800.907	-3.86056	0.232861	-12.2844	1.09883e-34	1.75462e-32	800.907	-2.32534	0.225049	-5.88912	3.88257e-09	8.02323e-07	TRUE
ACFLL8_11490	homE	2760888	2761271	-	128	RidA family protein	4213.82	7.59191	0.400452	16.4612	6.97434e-61	2.45008e-58	4213.82	4.8981	0.40117	9.71684	2.55579e-22	7.48208e-20	TRUE
ACFLL8_11495	homA	2761374	2762162	-	263	DUF3726 domain-containing protein	3561.09	5.34298	0.273129	15.9008	6.25186e-57	1.83023e-54	3561.09	4.91691	0.27332	14.3309	1.40391e-46	5.47992e-44	TRUE
ACFLL8_11500	homB	2762159	2763958	-	600	hypothetical protein	19677.3	5.08802	0.228967	17.8542	2.68209e-71	1.34603e-68	19677.3	5.46096	0.228968	19.4829	1.5321e-84	1.79409e-81	TRUE
ACFLL8_11505	BCCT	2763960	2765576	-	539	BCCT family transporter	8860.72	5.54585	0.251931	18.044	8.79252e-73	6.17762e-70	8860.72	5.60843	0.251963	18.2901	9.92518e-75	8.71679e-72	TRUE
ACFLL8_11510	homC	2765695	2766696	-	334	dipeptidase	9437.11	6.32981	0.319709	16.6708	2.13771e-62	8.3442e-60	9437.11	6.63796	0.319714	17.6344	1.34231e-69	9.43105e-67	TRUE
ACFLL8_11515	homD	2766706	2768172	-	489	aldehyde dehydrogenase family protein	19582.4	6.39526	0.299305	18.026	1.21791e-72	7.13083e-70	19582.4	8.08671	0.299243	23.6821	5.5164e-124	9.68956e-121	TRUE
ACFLL8_12560		2999261	3000190	-	310	substrate-binding domain-containing protein	2804.97	3.14489	0.216697	9.89811	4.24206e-23	2.40361e-21	2804.97	1.74771	0.217534	3.43722	0.00058771	0.0469236	TRUE
ACFLL8_00005	dnaA	1	1488	+	496	chromosomal replication initiator protein DnaA	774.535	2.64763	0.188125	8.75821	1.98375e-18	8.39629e-17	774.535	-0.25976	0.198757	0	1	1	FALSE
ACFLL8_00010	dnaN	1637	2740	+	368	DNA polymerase III subunit beta	596.477	0.816783	0.246372	0	1	1	596.477	0.117828	0.248683	0	1	1	FALSE
ACFLL8_00015	recF	2965	4050	+	362	DNA replication/repair protein RecF	2375.28	-0.0242775	0.185652	0	1	1	2375.28	-0.407372	0.186269	0	1	1	FALSE
ACFLL8_00020	gyrB	4070	6487	+	806	DNA topoisomerase %28ATP-hydrolyzing%29 subunit B	3387.99	-0.0975996	0.175632	0	1	1	3387.99	-0.598221	0.176182	0	1	1	FALSE
ACFLL8_00025		6638	7567	-	310	alpha/beta hydrolase	342.602	-1.57299	0.215146	-2.66326	0.0077388	0.0443498	342.602	-0.568661	0.211076	0	1	1	FALSE
ACFLL8_00030	luxS	7724	8236	-	171	S-ribosylhomocysteine lyase	2927.28	-1.58926	0.167583	-3.51619	0.00043779	0.00322615	2927.28	-0.519246	0.166911	0	1	1	FALSE
ACFLL8_00035	gmhB	8375	9004	-	210	D-glycero-beta-D-manno-heptose 1%2C7-bisphosphate 7-phosphatase	13477.3	-2.59193	0.270878	-5.87693	4.17948e-09	6.82907e-08	13477.3	-0.146886	0.27051	0	1	1	FALSE
ACFLL8_00040	glyS	9382	11451	-	690	glycine--tRNA ligase subunit beta	2902.97	-0.213685	0.202082	0	1	1	2902.97	-0.402914	0.202432	0	1	1	FALSE
ACFLL8_00045	glyQ	11448	12410	-	321	glycine--tRNA ligase subunit alpha	1161.86	0.535993	0.244986	0	1	1	1161.86	-0.857479	0.247448	0	1	1	FALSE
ACFLL8_00050	rfaD	12581	13537	+	319	ADP-glyceromanno-heptose 6-epimerase	938.777	0.279601	0.263522	0	1	1	938.777	-0.111625	0.264556	0	1	1	FALSE
ACFLL8_00055	waaF	13676	14695	+	340	lipopolysaccharide heptosyltransferase II	681.948	-0.608427	0.192731	0	1	1	681.948	-0.116232	0.192406	0	1	1	FALSE
ACFLL8_00060		14698	15603	+	302	hypothetical protein	489.239	0.248244	0.232376	0	1	1	489.239	-0.116649	0.234548	0	1	1	FALSE
ACFLL8_00065		15770	16903	-	378	glycosyltransferase family 4 protein	180.401	-0.144017	0.233427	0	1	1	180.401	-0.0502254	0.235715	0	1	1	FALSE
ACFLL8_00070		16906	17763	-	286	glycosyltransferase family 2 protein	232.001	-0.276206	0.225273	0	1	1	232.001	-0.130621	0.226821	0	1	1	FALSE
ACFLL8_00075		17920	18708	-	263	3-deoxy-D-manno-octulosonic acid kinase	358.043	-0.61325	0.208095	0	1	1	358.043	0.321387	0.205383	0	1	1	FALSE
ACFLL8_00080		18707	19870	+	388	glycosyltransferase family 9 protein	813.286	0.0837956	0.197017	0	1	1	813.286	-0.0192595	0.198012	0	1	1	FALSE
ACFLL8_00085	hldE	19870	21300	+	477	bifunctional D-glycero-beta-D-manno-heptose-7-phosphate kinase/D-glycero-beta-D-manno-heptose 1-phosphate adenylyltransferase HldE	1528.6	-0.222711	0.166968	0	1	1	1528.6	0.126242	0.167005	0	1	1	FALSE
ACFLL8_00090		21303	22625	+	441	3-deoxy-D-manno-octulosonic acid transferase	1116.85	-0.490605	0.175244	0	1	1	1116.85	0.0106022	0.175015	0	1	1	FALSE
ACFLL8_00095		22803	23579	-	259	DeoR/GlpR family DNA-binding transcription regulator	632.091	-1.08172	0.252252	-0.32395	0.745976	1	632.091	-0.110907	0.25073	0	1	1	FALSE
ACFLL8_00100		23887	25155	+	423	NupC/NupG family nucleoside CNT transporter	2402.35	-1.39543	0.153589	-2.57462	0.010035	0.0560461	2402.35	-0.461579	0.152908	0	1	1	FALSE
ACFLL8_00105		25435	26289	+	285	outer membrane protein OmpK	1418.11	-1.36492	0.220602	-1.65421	0.0980853	0.394681	1418.11	-0.622564	0.220071	0	1	1	FALSE
ACFLL8_00110		26409	27110	-	234	DUF3157 family protein	156.071	0.454022	0.229774	0	1	1	156.071	-0.434197	0.241953	0	1	1	FALSE
ACFLL8_00115	rpiA	27124	27795	-	224	ribose-5-phosphate isomerase RpiA	265.991	-0.182332	0.211067	0	1	1	265.991	-0.343237	0.214472	0	1	1	FALSE
ACFLL8_00120	ilvA	28052	29587	+	512	threonine ammonia-lyase%2C biosynthetic	755.24	1.19682	0.28102	0.700392	0.483683	1	755.24	-0.0245236	0.283522	0	1	1	FALSE
ACFLL8_00125		30261	30989	-	243	5-formyltetrahydrofolate cyclo-ligase	467.014	-0.210146	0.196813	0	1	1	467.014	-0.17052	0.198094	0	1	1	FALSE
ACFLL8_00135		31283	31645	-	121	cell division protein ZapA	390.626	1.05861	0.289333	0.202585	0.839459	1	390.626	0.342214	0.292271	0	1	1	FALSE
ACFLL8_00140		31905	32546	+	214	UPF0149 family protein	963.855	0.894101	0.284783	0	1	1	963.855	-0.307657	0.286791	0	1	1	FALSE
ACFLL8_00145	pepP	32699	34042	+	448	Xaa-Pro aminopeptidase	1022.62	-0.168056	0.179577	0	1	1	1022.62	-0.384305	0.180738	0	1	1	FALSE
ACFLL8_00150	ubiH	34047	35294	+	416	2-octaprenyl-6-methoxyphenyl hydroxylase	975.827	0.0358271	0.163737	0	1	1	975.827	-0.643052	0.166193	0	1	1	FALSE
ACFLL8_00155		35452	36780	+	443	UbiH/UbiF/VisC/COQ6 family ubiquinone biosynthesis hydroxylase	1509.19	-0.451032	0.181665	0	1	1	1509.19	-0.437744	0.182161	0	1	1	FALSE
ACFLL8_00160		36920	38317	-	466	S41 family peptidase	2295.94	0.670764	0.187204	0	1	1	2295.94	0.193929	0.187825	0	1	1	FALSE
ACFLL8_00165		38487	39620	-	378	murein hydrolase activator EnvC family protein	606.976	-0.989176	0.187964	0	1	1	606.976	-0.170433	0.186409	0	1	1	FALSE
ACFLL8_00170	gpmI	39900	41462	-	521	2%2C3-bisphosphoglycerate-independent phosphoglycerate mutase	2609.2	-0.860068	0.211206	0	1	1	2609.2	-0.34555	0.211107	0	1	1	FALSE
ACFLL8_00175		41920	42339	+	140	rhodanese-like domain-containing protein	822.518	2.88512	0.241385	7.8096	5.73683e-15	1.74309e-13	822.518	0.0315714	0.248857	0	1	1	FALSE
ACFLL8_00180	secB	42404	42907	+	168	protein-export chaperone SecB	232.927	1.35712	0.246217	1.45042	0.146941	0.556855	232.927	-0.243166	0.258326	0	1	1	FALSE
ACFLL8_00185		43102	43848	+	249	16S rRNA %28uracil%281498%29-N%283%29%29-methyltransferase	112.784	0.720169	0.283604	0	1	1	112.784	-0.396083	0.299654	0	1	1	FALSE
ACFLL8_00190	gshB	44052	45023	+	324	glutathione synthase	808.609	0.0183169	0.189739	0	1	1	808.609	0.0646534	0.190452	0	1	1	FALSE
ACFLL8_00195		45135	46040	+	302	TonB family protein	1027.27	-0.494429	0.201115	0	1	1	1027.27	-0.0686506	0.201029	0	1	1	FALSE
ACFLL8_00200		46056	46613	+	186	YqgE/AlgH family protein	708.659	0.270019	0.18784	0	1	1	708.659	-0.530307	0.191024	0	1	1	FALSE
ACFLL8_00205	ruvX	46606	47061	+	152	Holliday junction resolvase RuvX	1286.49	0.602285	0.191532	0	1	1	1286.49	0.0512631	0.192738	0	1	1	FALSE
ACFLL8_00210	pyrR	47144	47692	+	183	bifunctional pyr operon transcriptional regulator/uracil phosphoribosyltransferase PyrR	220.97	-0.555698	0.269472	0	1	1	220.97	-0.688829	0.272841	0	1	1	FALSE
ACFLL8_00215		47689	48741	+	351	aspartate carbamoyltransferase catalytic subunit	455.802	-0.666726	0.229848	0	1	1	455.802	-0.628136	0.231128	0	1	1	FALSE
ACFLL8_00220		48738	50003	+	422	dihydroorotase	559.969	-0.503452	0.20042	0	1	1	559.969	-0.754314	0.202637	0	1	1	FALSE
ACFLL8_00225		50302	50487	+	62	4-oxalocrotonate tautomerase family protein	2481.54	0.695192	0.231465	0	1	1	2481.54	-0.113015	0.232148	0	1	1	FALSE
ACFLL8_00230	serA	50725	51975	-	417	phosphoglycerate dehydrogenase	936.565	2.78182	0.281517	6.32933	2.46224e-10	4.62558e-09	936.565	-0.302733	0.288206	0	1	1	FALSE
ACFLL8_00235	xseB	52288	52572	+	95	exodeoxyribonuclease VII small subunit	668.096	1.16834	0.229216	0.734412	0.462697	1	668.096	-0.263131	0.233363	0	1	1	FALSE
ACFLL8_00240		52599	53498	+	300	polyprenyl synthetase family protein	1113.85	0.334798	0.185517	0	1	1	1113.85	-0.234555	0.18707	0	1	1	FALSE
ACFLL8_00245	dxs	53511	55433	+	641	1-deoxy-D-xylulose-5-phosphate synthase	3992.52	-0.253079	0.154385	0	1	1	3992.52	0.0284174	0.154438	0	1	1	FALSE
ACFLL8_00250		55621	56244	+	208	glutathione S-transferase family protein	408.203	-0.416616	0.234613	0	1	1	408.203	0.303614	0.233367	0	1	1	FALSE
ACFLL8_00255		56853	58157	+	435	Fic family protein	606.555	1.22247	0.210585	1.05643	0.290774	0.975634	606.555	0.793566	0.212371	0	1	1	FALSE
ACFLL8_00260		58304	59020	-	239	hemolysin III family protein	606.196	-0.432618	0.238764	0	1	1	606.196	-0.39696	0.239639	0	1	1	FALSE
ACFLL8_00265	ribA	59155	59790	-	212	GTP cyclohydrolase II	411.283	0.161707	0.216073	0	1	1	411.283	-0.358664	0.21959	0	1	1	FALSE
ACFLL8_00270	hemE	60130	61227	+	366	uroporphyrinogen decarboxylase	671.291	0.117377	0.184656	0	1	1	671.291	0.0008833	0.18597	0	1	1	FALSE
ACFLL8_00275		61284	61655	+	124	VanZ family protein	127.512	-1.61221	0.332053	-1.84371	0.0652258	0.278081	127.512	0.111022	0.316877	0	1	1	FALSE
ACFLL8_00280	speE	61927	62790	+	288	polyamine aminopropyltransferase	224.95	1.16056	0.31643	0.507405	0.611871	1	224.95	-0.0516533	0.323815	0	1	1	FALSE
ACFLL8_00285		63204	64229	+	342	amino acid ABC transporter substrate-binding protein	16275.5	-1.65004	0.533366	-1.21874	0.222942	0.789511	16275.5	-0.15791	0.533305	0	1	1	FALSE
ACFLL8_00290		64459	65649	+	397	amino acid ABC transporter permease	1563.99	-2.13311	0.474149	-2.38977	0.0168589	0.0892234	1563.99	-0.328117	0.473085	0	1	1	FALSE
ACFLL8_00295		65660	66784	+	375	amino acid ABC transporter permease	2969.48	-1.82803	0.868622	-0.953268	0.340454	1	2969.48	-0.137795	0.868367	0	1	1	FALSE
ACFLL8_00300		66863	67591	+	243	amino acid ABC transporter ATP-binding protein	5178.39	-1.09828	0.91407	-0.107523	0.914374	1	5178.39	0.0856974	0.914001	0	1	1	FALSE
ACFLL8_00305		67736	68272	-	179	hypothetical protein	171.367	1.27478	0.318381	0.863049	0.38811	1	171.367	0.0883986	0.327616	0	1	1	FALSE
ACFLL8_00310		68563	68991	+	143	host attachment protein	12844.3	0.393691	0.382022	0	1	1	12844.3	0.118454	0.382064	0	1	1	FALSE
ACFLL8_00315		69139	70086	-	316	LysR family transcriptional regulator	817.94	-0.0205708	0.199722	0	1	1	817.94	-0.465845	0.201536	0	1	1	FALSE
ACFLL8_00320		70368	71144	+	259	ferredoxin--NADP reductase	1601.76	1.93821	0.489262	1.9176	0.0551615	0.244675	1601.76	-0.292723	0.490613	0	1	1	FALSE
ACFLL8_00325	glnK	71352	71690	-	113	P-II family nitrogen regulator	20231.3	0.702136	0.343508	0	1	1	20231.3	0.218255	0.343547	0	1	1	FALSE
ACFLL8_00330		71841	73088	-	416	ammonium transporter	23838.2	-1.68296	1.25729	-0.543203	0.58699	1	23838.2	-0.812024	1.25728	0	1	1	FALSE
ACFLL8_00335		73121	73459	-	113	P-II family nitrogen regulator	5639.18	-1.55083	0.359322	-1.53296	0.125285	0.486866	5639.18	-0.989905	0.359277	0	1	1	FALSE
ACFLL8_00340		73896	74270	+	125	accessory factor UbiK family protein	3523.95	2.37491	0.178692	7.69432	1.42249e-14	3.99777e-13	3523.95	0.709367	0.179743	0	1	1	FALSE
ACFLL8_00345		74357	74635	-	93	hypothetical protein	166.596	2.00183	0.366388	2.73434	0.00625058	0.0365363	166.596	-0.217371	0.383075	0	1	1	FALSE
ACFLL8_00350		75162	75443	+	94	hypothetical protein	397.664	0.0866116	0.322615	0	1	1	397.664	0.170821	0.323355	0	1	1	FALSE
ACFLL8_00355		75796	77334	+	513	YifB family Mg chelatase-like AAA ATPase	6933.84	-3.23725	0.333093	-6.7166	1.86017e-11	3.98461e-10	6933.84	-0.997562	0.332421	0	1	1	FALSE
ACFLL8_00360		77363	78394	-	344	DUF4105 domain-containing protein	735.86	-2.75474	0.256404	-6.84367	7.7188e-12	1.70542e-10	735.86	-0.805502	0.250576	0	1	1	FALSE
ACFLL8_00365		78405	79556	-	384	pyridoxal phosphate-dependent aminotransferase	723.143	-1.58953	0.20791	-2.83553	0.00457496	0.0277579	723.143	-0.552214	0.205809	0	1	1	FALSE
ACFLL8_00370		79645	80175	-	177	hypothetical protein	342.139	-1.37823	0.236189	-1.6014	0.109289	0.435299	342.139	-0.679928	0.234362	0	1	1	FALSE
ACFLL8_00375		80163	81173	-	337	alpha/beta hydrolase	1027.15	0.533347	0.215092	0	1	1	1027.15	0.0280901	0.216377	0	1	1	FALSE
ACFLL8_00380		81456	83636	+	727	malate synthase G	4078.85	0.248256	0.301066	0	1	1	4078.85	-0.533865	0.301409	0	1	1	FALSE
ACFLL8_00385		83916	84332	+	139	PaaI family thioesterase	710.009	0.118751	0.221033	0	1	1	710.009	0.126249	0.221798	0	1	1	FALSE
ACFLL8_00390		84360	84779	-	140	DUF423 domain-containing protein	200.979	0.614231	0.231598	0	1	1	200.979	0.246239	0.236512	0	1	1	FALSE
ACFLL8_00395	thiS	84895	85095	+	67	sulfur carrier protein ThiS	196.279	1.02059	0.280579	0.0733937	0.941493	1	196.279	-0.0260334	0.28897	0	1	1	FALSE
ACFLL8_00400		85163	85996	+	278	thiazole synthase	742.966	-0.0502536	0.209219	0	1	1	742.966	0.269456	0.209338	0	1	1	FALSE
ACFLL8_00405	trmB	86058	86882	+	275	tRNA %28guanosine%2846%29-N7%29-methyltransferase TrmB	482.32	1.56499	0.263375	2.14519	0.0319378	0.153485	482.32	0.452141	0.266965	0	1	1	FALSE
ACFLL8_00410		87011	87919	+	303	putative RNA methyltransferase	281.286	1.02472	0.199551	0.123869	0.901419	1	281.286	0.191959	0.206204	0	1	1	FALSE
ACFLL8_00415		88149	89078	-	310	AEC family transporter	1070.07	1.17216	0.252468	0.681901	0.495301	1	1070.07	-0.281294	0.254872	0	1	1	FALSE
ACFLL8_00420		89307	89900	+	198	hypothetical protein	1865.75	-1.02906	0.163104	-0.178161	0.858596	1	1865.75	-0.282868	0.162609	0	1	1	FALSE
ACFLL8_00425		89959	90618	+	220	SCO family protein	926.561	-1.52639	0.195139	-2.69752	0.00698574	0.0404298	926.561	-0.448913	0.193333	0	1	1	FALSE
ACFLL8_00430		91043	91750	-	236	FKBP-type peptidyl-prolyl cis-trans isomerase	4966.1	0.127775	0.172894	0	1	1	4966.1	0.38455	0.172938	0	1	1	FALSE
ACFLL8_00435		91884	92489	-	202	TIGR02444 family protein	297.004	0.283835	0.198129	0	1	1	297.004	-0.0307628	0.201959	0	1	1	FALSE
ACFLL8_00440		92640	94574	+	645	ATP-binding cassette domain-containing protein	758.925	0.532087	0.260772	0	1	1	758.925	0.0992192	0.262074	0	1	1	FALSE
ACFLL8_00445		94578	95366	+	263	pseudouridine synthase	817.859	-2.24106	0.232462	-5.33877	9.35771e-08	1.27913e-06	817.859	0.178905	0.226151	0	1	1	FALSE
ACFLL8_00450		95377	96600	-	408	patatin-like phospholipase family protein	3218.69	-3.08688	0.218487	-9.5515	1.27836e-21	6.80435e-20	3218.69	0.469619	0.214657	0	1	1	FALSE
ACFLL8_00455		96824	97273	-	150	YqaA family protein	139.844	-0.14195	0.233131	0	1	1	139.844	-0.273131	0.238568	0	1	1	FALSE
ACFLL8_00460	thiD	97394	98194	+	267	bifunctional hydroxymethylpyrimidine kinase/phosphomethylpyrimidine kinase	1300.7	-0.0995876	0.170309	0	1	1	1300.7	0.199987	0.170424	0	1	1	FALSE
ACFLL8_00465		98364	98894	+	177	chalcone isomerase family protein	887.222	-0.125505	0.198767	0	1	1	887.222	0.147255	0.198964	0	1	1	FALSE
ACFLL8_00470	dctP	99055	100146	-	364	TRAP transporter substrate-binding protein DctP	6008.87	-1.98982	0.415522	-2.38212	0.0172134	0.0905248	6008.87	-0.390211	0.415263	0	1	1	FALSE
ACFLL8_00475		100591	101253	+	221	TRAP transporter small permease	3388.03	-2.8733	0.446371	-4.19674	2.70784e-05	0.0002585	3388.03	-1.49914	0.445861	-1.11949	0.262932	1	FALSE
ACFLL8_00480		101378	102652	+	425	TRAP transporter large permease	4829.01	-3.386	0.443008	-5.3859	7.20848e-08	1.01294e-06	4829.01	-1.44548	0.44234	-1.0071	0.313889	1	FALSE
ACFLL8_00485	dtd	102772	103221	+	150	D-aminoacyl-tRNA deacylase	733.402	-0.215499	0.178291	0	1	1	733.402	-0.836695	0.181289	0	1	1	FALSE
ACFLL8_00490		103328	104374	-	349	TRAP transporter substrate-binding protein	3459.28	0.453345	0.292675	0	1	1	3459.28	-1.0034	0.293423	-0.0115835	0.990758	1	FALSE
ACFLL8_00495		104626	106032	-	469	TRAP transporter large permease subunit	2013.7	-0.536199	0.310465	0	1	1	2013.7	-0.854356	0.310919	0	1	1	FALSE
ACFLL8_00500		106032	106601	-	190	TRAP transporter small permease subunit	1266.37	-0.625508	0.349778	0	1	1	1266.37	-0.77572	0.350261	0	1	1	FALSE
ACFLL8_00505		107105	107941	-	279	endonuclease/exonuclease/phosphatase family protein	587.14	-0.732611	0.199101	0	1	1	587.14	-0.0690599	0.198175	0	1	1	FALSE
ACFLL8_00510		107941	108585	-	215	thiol:disulfide interchange protein DsbA/DsbL	2015.99	0.0153641	0.161409	0	1	1	2015.99	0.12353	0.161681	0	1	1	FALSE
ACFLL8_00515		108847	109530	-	228	c-type cytochrome	1172.88	-0.564893	0.215561	0	1	1	1172.88	0.278176	0.2149	0	1	1	FALSE
ACFLL8_00520	yihA	109845	110534	+	230	ribosome biogenesis GTP-binding protein YihA/YsxC	765.245	0.915949	0.209834	0	1	1	765.245	-0.168526	0.212895	0	1	1	FALSE
ACFLL8_00525		110762	111211	-	150	hypothetical protein	6808.45	-1.92383	0.343022	-2.6932	0.00707701	0.0408907	6808.45	0.388775	0.342585	0	1	1	FALSE
ACFLL8_00530		111434	112156	-	241	HAD family hydrolase	263.884	-0.603496	0.206123	0	1	1	263.884	-0.250879	0.20629	0	1	1	FALSE
ACFLL8_00535		112156	113214	-	353	tyrosine recombinase XerC	370.67	-0.52591	0.266294	0	1	1	370.67	-0.0915215	0.266081	0	1	1	FALSE
ACFLL8_00540		113211	114002	-	264	DUF484 family protein	282.551	0.067497	0.286671	0	1	1	282.551	-0.100669	0.288932	0	1	1	FALSE
ACFLL8_00545	dapF	114073	114903	-	277	diaminopimelate epimerase	296.347	-0.679643	0.283722	0	1	1	296.347	0.00840854	0.282347	0	1	1	FALSE
ACFLL8_00550	lysA	114903	116174	-	424	diaminopimelate decarboxylase	772.102	0.0306879	0.207993	0	1	1	772.102	-0.166921	0.209214	0	1	1	FALSE
ACFLL8_00555		116234	116455	-	74	lipoprotein	50.4069	0.777121	0.451443	0	1	1	50.4069	0.267998	0.463269	0	1	1	FALSE
ACFLL8_00560	argH	116534	117928	-	465	argininosuccinate lyase	1132.78	1.15033	0.228476	0.657978	0.510552	1	1132.78	-0.221032	0.230826	0	1	1	FALSE
ACFLL8_00565	hemC	118211	119158	+	316	hydroxymethylbilane synthase	1016.91	0.201727	0.226655	0	1	1	1016.91	-0.780827	0.22892	0	1	1	FALSE
ACFLL8_00570		119193	120086	+	298	uroporphyrinogen-III synthase	3048.63	-0.0088043	0.235316	0	1	1	3048.63	-0.0423635	0.235509	0	1	1	FALSE
ACFLL8_00575		120087	121652	+	522	uroporphyrinogen-III C-methyltransferase	3621.89	-0.70951	0.240985	0	1	1	3621.89	-0.22708	0.240939	0	1	1	FALSE
ACFLL8_00580		121649	122872	+	408	heme biosynthesis HemY N-terminal domain-containing protein	5280.09	0.0554292	0.170919	0	1	1	5280.09	-0.169307	0.171147	0	1	1	FALSE
ACFLL8_00585		123280	123864	+	195	DUF2780 domain-containing protein	268.068	0.400063	0.267712	0	1	1	268.068	-0.0613903	0.271529	0	1	1	FALSE
ACFLL8_00590	ybiO	124004	126463	-	820	mechanosensitive channel protein	2887.27	-1.29246	0.204653	-1.42905	0.152991	0.576054	2887.27	-0.627429	0.204435	0	1	1	FALSE
ACFLL8_00595		126891	127847	+	319	ABC transporter substrate-binding protein	322.794	1.45977	0.349222	1.31656	0.187986	0.687911	322.794	0.259817	0.353659	0	1	1	FALSE
ACFLL8_00600		128003	128971	+	323	FecCD family ABC transporter permease	106.907	0.514069	0.339512	0	1	1	106.907	0.403671	0.343587	0	1	1	FALSE
ACFLL8_00605		129021	130124	+	368	FecCD family ABC transporter permease	81.9027	1.23734	0.341618	0.694756	0.487209	1	81.9027	0.70836	0.350801	0	1	1	FALSE
ACFLL8_00610		130257	131117	+	287	ABC transporter ATP-binding protein	251.367	0.626514	0.240895	0	1	1	251.367	0.152698	0.245284	0	1	1	FALSE
ACFLL8_00620	smpB	131741	132217	-	159	SsrA-binding protein SmpB	836.741	0.39876	0.175322	0	1	1	836.741	-0.187304	0.17752	0	1	1	FALSE
ACFLL8_00625		132380	132817	+	146	type II toxin-antitoxin system RatA family toxin	403.903	0.627103	0.215747	0	1	1	403.903	-0.391921	0.221326	0	1	1	FALSE
ACFLL8_00630		132890	133198	+	103	RnfH family protein	637.838	1.73904	0.188658	3.91735	8.95264e-05	0.00075968	637.838	-0.180813	0.195696	0	1	1	FALSE
ACFLL8_00635		133358	133786	-	143	outer membrane protein assembly factor BamE	5848.98	1.14923	0.222033	0.672123	0.501506	1	5848.98	-0.0204553	0.222429	0	1	1	FALSE
ACFLL8_00640	fur	133865	134287	+	141	ferric iron uptake transcriptional regulator	3215.97	2.39179	0.222466	6.25616	3.94564e-10	7.25708e-09	3215.97	0.264844	0.223771	0	1	1	FALSE
ACFLL8_00645	recN	134443	136113	-	557	DNA repair protein RecN	531.398	-0.177838	0.201565	0	1	1	531.398	-0.236252	0.202991	0	1	1	FALSE
ACFLL8_00650	grpE	136478	137107	+	210	nucleotide exchange factor GrpE	3239.01	1.11532	0.384133	0.300198	0.764026	1	3239.01	0.416678	0.384394	0	1	1	FALSE
ACFLL8_00655	dnaK	137324	139246	+	641	molecular chaperone DnaK	21758.8	0.0199558	0.413131	0	1	1	21758.8	-0.223765	0.413154	0	1	1	FALSE
ACFLL8_00660	dnaJ	139415	140563	+	383	molecular chaperone DnaJ	2454.66	-0.295103	0.304007	0	1	1	2454.66	-0.481981	0.304288	0	1	1	FALSE
ACFLL8_00665		140697	141722	-	342	esterase-like activity of phytase family protein	585.489	0.06938	0.219241	0	1	1	585.489	0.0579377	0.220237	0	1	1	FALSE
ACFLL8_00670	dapB	141933	142739	+	269	4-hydroxy-tetrahydrodipicolinate reductase	843.293	0.41285	0.210586	0	1	1	843.293	-0.256389	0.212589	0	1	1	FALSE
ACFLL8_00675	carA	143316	144461	+	382	glutamine-hydrolyzing carbamoyl-phosphate synthase small subunit	679.537	0.813613	0.337034	0	1	1	679.537	-0.633802	0.340049	0	1	1	FALSE
ACFLL8_00680	carB	144529	147759	+	1077	carbamoyl-phosphate synthase large subunit	3562.39	0.767125	0.214132	0	1	1	3562.39	-0.654091	0.215029	0	1	1	FALSE
ACFLL8_00685	greA	147756	148232	+	159	transcription elongation factor GreA	4394.84	2.04103	0.22509	4.62496	3.74662e-06	4.08754e-05	4394.84	-0.0909183	0.226072	0	1	1	FALSE
ACFLL8_00690		148359	148811	+	151	hypothetical protein	92.5647	1.33438	0.326956	1.0227	0.306449	1	92.5647	-1.0778	0.367967	-0.211429	0.832552	1	FALSE
ACFLL8_00695	yhbY	148918	149232	-	105	ribosome assembly RNA-binding protein YhbY	253.656	1.52034	0.228358	2.27861	0.0226903	0.113548	253.656	0.144961	0.238136	0	1	1	FALSE
ACFLL8_00700	rlmE	149408	150136	+	243	23S rRNA %28uridine%282552%29-2%27-O%29-methyltransferase RlmE	2670.97	-0.453906	0.194816	0	1	1	2670.97	-1.11953	0.195676	-0.610842	0.541304	1	FALSE
ACFLL8_00705	ftsH	150586	152589	+	668	ATP-dependent zinc metalloprotease FtsH	15842.1	-0.345731	0.153755	0	1	1	15842.1	-0.194005	0.153788	0	1	1	FALSE
ACFLL8_00710	folP	152980	153873	+	298	dihydropteroate synthase	475.73	2.02169	0.202751	5.03912	4.67679e-07	5.8055e-06	475.73	-0.0328844	0.212085	0	1	1	FALSE
ACFLL8_00715	glmM	153870	155222	+	451	phosphoglucosamine mutase	534.745	0.772275	0.256171	0	1	1	534.745	-0.148794	0.259326	0	1	1	FALSE
ACFLL8_00720	tpiA	155396	156142	+	249	triose-phosphate isomerase	1394.6	2.79803	0.289839	6.20354	5.52077e-10	9.94588e-09	1394.6	0.276455	0.292794	0	1	1	FALSE
ACFLL8_00725	secG	156148	156534	+	129	preprotein translocase subunit SecG	2331.42	4.57261	0.410491	8.70326	3.22481e-18	1.34866e-16	2331.42	0.0935065	0.414948	0	1	1	FALSE
ACFLL8_00740	rimP	156988	157446	+	153	ribosome maturation factor RimP	598.221	1.1568	0.183841	0.852929	0.393699	1	598.221	0.0123196	0.188343	0	1	1	FALSE
ACFLL8_00745	nusA	157523	159016	+	498	transcription termination factor NusA	2889.27	1.28034	0.239225	1.17188	0.241244	0.843275	2889.27	0.369692	0.239796	0	1	1	FALSE
ACFLL8_00750	infB	159045	161495	+	817	translation initiation factor IF-2	3154.61	0.352799	0.205606	0	1	1	3154.61	0.189364	0.20587	0	1	1	FALSE
ACFLL8_00755	rbfA	161523	161948	+	142	30S ribosome-binding factor RbfA	885.934	0.0648642	0.248348	0	1	1	885.934	0.161699	0.248762	0	1	1	FALSE
ACFLL8_00760	truB	161948	162877	+	310	tRNA pseudouridine%2855%29 synthase TruB	3161.37	1.64227	0.322015	1.99454	0.0460931	0.211115	3161.37	-0.0504712	0.322737	0	1	1	FALSE
ACFLL8_00765	rpsO	162976	163245	+	90	30S ribosomal protein S15	722.876	3.76716	0.427525	6.47251	9.63879e-11	1.90231e-09	722.876	0.104449	0.435576	0	1	1	FALSE
ACFLL8_00770	pnp	163493	165646	+	718	polyribonucleotide nucleotidyltransferase	1001.68	1.41917	0.166023	2.52477	0.0115773	0.0636477	1001.68	0.341246	0.168728	0	1	1	FALSE
ACFLL8_00775		165757	166938	-	394	acetyl-CoA C-acetyltransferase	8622.01	-0.104207	0.187106	0	1	1	8622.01	-0.377063	0.18725	0	1	1	FALSE
ACFLL8_00780	panD	167217	167597	-	127	aspartate 1-decarboxylase	174.5	2.00643	0.368306	2.7326	0.00628367	0.0366686	174.5	-0.629795	0.389562	0	1	1	FALSE
ACFLL8_00785	panC	167697	168551	-	285	pantoate--beta-alanine ligase	224.714	-0.492612	0.232678	0	1	1	224.714	0.112093	0.231128	0	1	1	FALSE
ACFLL8_00790	panB	168551	169342	-	264	3-methyl-2-oxobutanoate hydroxymethyltransferase	684.534	-0.278395	0.224004	0	1	1	684.534	-0.688028	0.225971	0	1	1	FALSE
ACFLL8_00795	folK	169524	170021	-	166	2-amino-4-hydroxy-6- hydroxymethyldihydropteridine diphosphokinase	269.472	-0.935261	0.248378	0	1	1	269.472	-0.528489	0.248195	0	1	1	FALSE
ACFLL8_00800	pcnB	170051	171451	-	467	polynucleotide adenylyltransferase PcnB	1930.35	-0.596674	0.174984	0	1	1	1930.35	-0.314086	0.175089	0	1	1	FALSE
ACFLL8_00805		172557	174056	-	500	sigma 54-interacting transcriptional regulator	829.55	0.502461	0.24648	0	1	1	829.55	-0.580961	0.249098	0	1	1	FALSE
ACFLL8_00810	gluQRS	174185	175099	-	305	tRNA glutamyl-Q%2834%29 synthetase GluQRS	124.98	0.455794	0.242457	0	1	1	124.98	0.0709647	0.250386	0	1	1	FALSE
ACFLL8_00815	dksA	175235	175672	-	146	RNA polymerase-binding protein DksA	2280.36	5.7598	0.294933	16.1386	1.36635e-58	4.36361e-56	2280.36	0.193869	0.307839	0	1	1	FALSE
ACFLL8_00820		175948	177132	+	395	aminotransferase class I/II-fold pyridoxal phosphate-dependent enzyme	629.845	0.00871866	0.19279	0	1	1	629.845	0.328333	0.192941	0	1	1	FALSE
ACFLL8_00825		177132	177998	+	289	DNA/RNA nuclease SfsA	871.252	-0.377701	0.19727	0	1	1	871.252	0.170366	0.196924	0	1	1	FALSE
ACFLL8_00830		178032	178406	-	125	Rieske %282Fe-2S%29 protein	227.209	-0.0845256	0.260738	0	1	1	227.209	0.26097	0.26091	0	1	1	FALSE
ACFLL8_00835		178607	179668	+	354	ChaN family lipoprotein	814.836	-1.08006	0.191441	-0.418184	0.675813	1	814.836	-0.518059	0.19094	0	1	1	FALSE
ACFLL8_00840		179795	180289	-	165	acyl-CoA thioesterase	713.316	-1.85477	0.265645	-3.21771	0.00129219	0.00866312	713.316	0.00042434	0.261683	0	1	1	FALSE
ACFLL8_00845	metW	180525	181139	-	205	methionine biosynthesis protein MetW	282.609	-0.0753688	0.248897	0	1	1	282.609	-0.383096	0.252352	0	1	1	FALSE
ACFLL8_00850		181132	182325	-	398	homoserine O-acetyltransferase	588.084	0.12216	0.235018	0	1	1	588.084	-0.417286	0.237365	0	1	1	FALSE
ACFLL8_00855		182594	183172	-	193	YggT family protein	466.582	0.194708	0.276783	0	1	1	466.582	0.0441532	0.278117	0	1	1	FALSE
ACFLL8_00860	proC	183342	184184	-	281	pyrroline-5-carboxylate reductase	750.204	-0.943557	0.240324	0	1	1	750.204	-0.419411	0.239992	0	1	1	FALSE
ACFLL8_00865		184379	185131	-	251	YggS family pyridoxal phosphate-dependent enzyme	578.395	0.274058	0.183376	0	1	1	578.395	-0.148177	0.18589	0	1	1	FALSE
ACFLL8_00870		185327	186358	+	344	type IV pilus twitching motility protein PilT	5075.15	-1.85742	0.328266	-2.61196	0.00900255	0.0510096	5075.15	-0.491697	0.327963	0	1	1	FALSE
ACFLL8_00875		186564	187718	+	385	PilT/PilU family type 4a pilus ATPase	2728.91	-0.985789	0.319918	0	1	1	2728.91	-0.513242	0.319872	0	1	1	FALSE
ACFLL8_00880		187825	188982	-	386	anhydro-N-acetylmuramic acid kinase	226.85	-1.03298	0.227861	-0.14472	0.884932	1	226.85	-0.344883	0.225384	0	1	1	FALSE
ACFLL8_00885	tyrS	189166	190374	+	403	tyrosine--tRNA ligase	1835.99	3.1783	0.236694	9.20298	3.48147e-20	1.6754e-18	1835.99	-0.124634	0.241298	0	1	1	FALSE
ACFLL8_00905		196244	196687	-	148	VOC family protein	53.8276	0.480784	0.34559	0	1	1	53.8276	0.139998	0.35759	0	1	1	FALSE
ACFLL8_00910	hisC	196807	197862	-	352	histidinol-phosphate transaminase	1097.83	1.20213	0.169813	1.19029	0.233934	0.822632	1097.83	0.0923181	0.172382	0	1	1	FALSE
ACFLL8_00915		198134	199273	+	380	alkene reductase	471.742	-0.371615	0.189024	0	1	1	471.742	0.243252	0.188101	0	1	1	FALSE
ACFLL8_00920		199453	199920	+	156	copper resistance protein NlpE N-terminal domain-containing protein	6630.96	1.40977	0.165137	2.48138	0.0130874	0.0707322	6630.96	0.18472	0.16561	0	1	1	FALSE
ACFLL8_00925	radA	200106	201521	+	472	DNA repair protein RadA	582.381	0.300351	0.190651	0	1	1	582.381	0.360219	0.191539	0	1	1	FALSE
ACFLL8_00930		201633	202277	-	215	DUF1415 domain-containing protein	450.874	1.48299	0.24759	1.95075	0.0510866	0.230974	450.874	0.237471	0.252218	0	1	1	FALSE
ACFLL8_00935		202555	204399	+	615	SulP family inorganic anion transporter	655.393	-0.0169409	0.20844	0	1	1	655.393	0.617138	0.207837	0	1	1	FALSE
ACFLL8_00940	mnmH	204557	205663	+	369	tRNA 2-selenouridine%2834%29 synthase MnmH	1618.61	-0.589988	0.182156	0	1	1	1618.61	0.046277	0.181836	0	1	1	FALSE
ACFLL8_00945		205699	206370	-	224	type 1 glutamine amidotransferase	850.745	-0.0636994	0.168782	0	1	1	850.745	0.174932	0.1691	0	1	1	FALSE
ACFLL8_00950		206572	206868	+	99	MGMT family protein	225.706	-0.0846989	0.209582	0	1	1	225.706	0.682454	0.206911	0	1	1	FALSE
ACFLL8_00955		207022	207633	+	204	YjaG family protein	317.042	-0.9189	0.369265	0	1	1	317.042	0.621409	0.365377	0	1	1	FALSE
ACFLL8_00960		207706	208554	+	283	CHAD domain-containing protein	719.019	-0.0093793	0.229029	0	1	1	719.019	0.778997	0.228233	0	1	1	FALSE
ACFLL8_00965	hisF	208661	209434	-	258	imidazole glycerol phosphate synthase subunit HisF	1072.87	0.285111	0.227945	0	1	1	1072.87	-0.229549	0.229185	0	1	1	FALSE
ACFLL8_00970	hisA	209446	210192	-	249	1-%285-phosphoribosyl%29-5-%5B%285- phosphoribosylamino%29methylideneamino%5Dimidazole-4- carboxamide isomerase	868.391	0.520736	0.194454	0	1	1	868.391	-0.251472	0.196761	0	1	1	FALSE
ACFLL8_00975	hisH	210308	210949	-	214	imidazole glycerol phosphate synthase subunit HisH	589.616	0.430846	0.218138	0	1	1	589.616	-0.306376	0.221106	0	1	1	FALSE
ACFLL8_00980	hisB	211071	211664	-	198	imidazoleglycerol-phosphate dehydratase HisB	1406.1	0.924652	0.182479	0	1	1	1406.1	-0.0460794	0.184201	0	1	1	FALSE
ACFLL8_00985		211960	212406	+	149	acetyl-CoA sensor PanZ family protein	1100.72	0.899523	0.212008	0	1	1	1100.72	0.224757	0.213406	0	1	1	FALSE
ACFLL8_00990		212601	214997	+	799	AsmA family protein	8303.05	-0.584234	0.185249	0	1	1	8303.05	0.0363243	0.185191	0	1	1	FALSE
ACFLL8_00995	mutY	215110	216282	+	391	A/G-specific adenine glycosylase	150.628	0.0683162	0.229134	0	1	1	150.628	0.294295	0.230535	0	1	1	FALSE
ACFLL8_01000		216422	216733	+	104	oxidative damage protection protein	1254.28	0.999144	0.26652	0	1	1	1254.28	0.206378	0.267614	0	1	1	FALSE
ACFLL8_01030		217461	218549	-	363	sigma-54 interaction domain-containing protein	128.398	-0.17689	0.241234	0	1	1	128.398	-0.442535	0.248675	0	1	1	FALSE
ACFLL8_01035		218892	219278	-	129	hypothetical protein	93.0515	-0.959254	0.333494	0	1	1	93.0515	-0.735517	0.33558	0	1	1	FALSE
ACFLL8_01040		219395	220264	-	290	hypothetical protein	277.375	-1.77689	0.211595	-3.67158	0.00024106	0.00185304	277.375	-0.592511	0.204592	0	1	1	FALSE
ACFLL8_01045		220290	221243	-	318	CsgG/HfaB family protein	78.3598	-0.896658	0.280551	0	1	1	78.3598	-0.376441	0.277953	0	1	1	FALSE
ACFLL8_01050	thpD	221800	222906	+	369	ectoine hydroxylase	506.71	-0.0973168	0.298366	0	1	1	506.71	0.77311	0.297309	0	1	1	FALSE
ACFLL8_01055		223111	223845	+	245	fumarylacetoacetate hydrolase family protein	1167.31	-0.184647	0.177728	0	1	1	1167.31	-0.0152676	0.17807	0	1	1	FALSE
ACFLL8_01060	speA	224049	225947	-	633	biosynthetic arginine decarboxylase	674.021	0.0341663	0.215928	0	1	1	674.021	0.420489	0.215906	0	1	1	FALSE
ACFLL8_01065		226111	227073	-	321	homoserine kinase	536.046	-0.0137694	0.17735	0	1	1	536.046	0.49389	0.176908	0	1	1	FALSE
ACFLL8_01070		227279	227608	-	110	DUF2782 domain-containing protein	608.014	0.342011	0.186879	0	1	1	608.014	0.836473	0.186567	0	1	1	FALSE
ACFLL8_01075	polA	227952	230840	+	963	DNA polymerase I	793.477	-0.649458	0.175721	0	1	1	793.477	-0.2138	0.175561	0	1	1	FALSE
ACFLL8_01080		230886	231299	-	138	hypothetical protein	939.34	0.191711	0.336296	0	1	1	939.34	0.0540793	0.336828	0	1	1	FALSE
ACFLL8_01085		231788	233320	+	511	sigma-54 interaction domain-containing protein	1296.17	0.153073	0.341036	0	1	1	1296.17	-0.509485	0.341888	0	1	1	FALSE
ACFLL8_01090		233772	234908	+	379	TRAP transporter substrate-binding protein	2893.28	-1.31528	0.496418	-0.635109	0.525357	1	2893.28	-0.444367	0.496266	0	1	1	FALSE
ACFLL8_01095		234905	235651	+	249	TRAP transporter small permease subunit	761.756	-1.03395	0.551345	-0.0615837	0.950894	1	761.756	-0.248632	0.550949	0	1	1	FALSE
ACFLL8_01100		235641	236990	+	450	TRAP transporter large permease subunit	897.057	-0.390075	0.570826	0	1	1	897.057	-0.485653	0.571172	0	1	1	FALSE
ACFLL8_01105		237145	237744	+	200	hypothetical protein	422.484	1.58107	0.522869	1.11131	0.266437	0.914055	422.484	0.16858	0.525545	0	1	1	FALSE
ACFLL8_01110		238032	239189	+	386	TauD/TfdA family dioxygenase	145.113	-0.639927	0.236927	0	1	1	145.113	-0.110139	0.235276	0	1	1	FALSE
ACFLL8_01115		239210	239824	+	205	HD domain-containing protein	69.7789	0.371365	0.309562	0	1	1	69.7789	0.00045557	0.320636	0	1	1	FALSE
ACFLL8_01120		239876	240856	+	327	ABC transporter substrate-binding protein	170.398	-0.131281	0.273486	0	1	1	170.398	-0.273802	0.277392	0	1	1	FALSE
ACFLL8_01125		240970	241638	-	223	TetR/AcrR family transcriptional regulator	76.0618	0.607687	0.29846	0	1	1	76.0618	-0.384753	0.318969	0	1	1	FALSE
ACFLL8_01130		241872	243035	+	388	HlyD family secretion protein	146.723	0.269808	0.243888	0	1	1	146.723	0.0325036	0.249422	0	1	1	FALSE
ACFLL8_01135		243038	244612	+	525	DHA2 family efflux MFS transporter permease subunit	125.21	-0.531326	0.28959	0	1	1	125.21	-0.285131	0.290924	0	1	1	FALSE
ACFLL8_01140		244706	246247	-	514	4Fe-4S binding protein	148.253	1.43916	0.264641	1.65945	0.0970253	0.390958	148.253	0.816784	0.271789	0	1	1	FALSE
ACFLL8_01145		246291	247151	-	287	FTR1 family protein	64.1414	1.68558	0.331451	2.06841	0.0386011	0.180808	64.1414	0.925554	0.346218	0	1	1	FALSE
ACFLL8_01150		247275	247649	-	125	cupredoxin domain-containing protein	67.4074	-0.215785	0.318723	0	1	1	67.4074	0.21858	0.317829	0	1	1	FALSE
ACFLL8_01155		247873	248433	-	187	iron transporter	277.421	1.95613	0.339244	2.81841	0.00482619	0.0289324	277.421	0.347094	0.346212	0	1	1	FALSE
ACFLL8_01160		248682	251105	+	808	GNAT family N-acetyltransferase	435.727	-0.0482712	0.184624	0	1	1	435.727	0.125458	0.185459	0	1	1	FALSE
ACFLL8_01165		251385	252848	+	488	aminoacyl-histidine dipeptidase	2908.49	1.27057	0.188446	1.43579	0.151062	0.570011	2908.49	0.353029	0.189172	0	1	1	FALSE
ACFLL8_01170		252979	253365	-	129	hypothetical protein	645.393	-0.337898	0.324965	0	1	1	645.393	-0.695864	0.326322	0	1	1	FALSE
ACFLL8_01175		253644	254231	-	196	type 1 glutamine amidotransferase domain-containing protein	1936.96	-0.697492	0.311967	0	1	1	1936.96	-0.290757	0.311948	0	1	1	FALSE
ACFLL8_01180	rmuC	254446	256200	+	585	DNA recombination protein RmuC	958.952	-0.110218	0.230851	0	1	1	958.952	0.187206	0.230969	0	1	1	FALSE
ACFLL8_01185		256507	256803	+	99	DUF2282 domain-containing protein	418.829	-1.82174	0.393485	-2.08837	0.0367646	0.174062	418.829	-1.31041	0.39303	-0.789799	0.429645	1	FALSE
ACFLL8_01190		256894	257838	+	315	DUF692 family multinuclear iron-containing protein	450.314	-2.00048	0.211019	-4.7412	2.12457e-06	2.4154e-05	450.314	-1.36695	0.209429	-1.75213	0.0797513	1	FALSE
ACFLL8_01195		257835	258641	+	269	putative DNA-binding domain-containing protein	579.182	-2.22845	0.2516	-4.88255	1.04724e-06	1.24289e-05	579.182	-1.08266	0.248421	-0.332732	0.739337	1	FALSE
ACFLL8_01200		258751	259224	+	158	DoxX family protein	146.92	-0.923989	0.314266	0	1	1	146.92	-0.823769	0.316813	0	1	1	FALSE
ACFLL8_01205		259304	260416	-	371	App1 family protein	693.769	-0.415742	0.344673	0	1	1	693.769	-0.404629	0.345241	0	1	1	FALSE
ACFLL8_01210		260705	261184	-	160	Dps family protein	3395.58	-0.711027	0.25384	0	1	1	3395.58	-0.768125	0.254047	0	1	1	FALSE
ACFLL8_01215	betT	261654	263651	-	666	choline BCCT transporter BetT	26126.8	-2.55516	0.319712	-4.86427	1.14882e-06	1.34976e-05	26126.8	-0.590716	0.31959	0	1	1	FALSE
ACFLL8_01220		264053	264679	+	209	hypothetical protein	1137.68	-0.556854	0.187839	0	1	1	1137.68	0.197277	0.187206	0	1	1	FALSE
ACFLL8_01225		264679	265095	+	139	hypothetical protein	602.496	-2.34906	0.244979	-5.50685	3.65314e-08	5.28127e-07	602.496	0.182669	0.236019	0	1	1	FALSE
ACFLL8_01230		265109	267109	+	667	ATP-binding protein	3111.37	-1.98029	0.200484	-4.88959	1.01044e-06	1.20328e-05	3111.37	-0.110755	0.199225	0	1	1	FALSE
ACFLL8_01235		267102	268607	+	502	sigma-54-dependent transcriptional regulator	2016.84	-1.63556	0.245712	-2.58662	0.00969237	0.0544789	2016.84	-0.349959	0.244839	0	1	1	FALSE
ACFLL8_01240		268741	269490	+	250	DUF1007 family protein	635.631	0.380521	0.350542	0	1	1	635.631	0.0811893	0.351518	0	1	1	FALSE
ACFLL8_01245		269487	270743	+	419	nickel/cobalt transporter	738.695	-0.841953	0.324883	0	1	1	738.695	0.141453	0.323918	0	1	1	FALSE
ACFLL8_01250		270868	271296	-	143	HIT domain-containing protein	486.917	-0.135469	0.186826	0	1	1	486.917	0.209172	0.186943	0	1	1	FALSE
ACFLL8_01255		271645	272652	+	336	TAXI family TRAP transporter solute-binding subunit	1398.09	-0.435031	0.239325	0	1	1	1398.09	-0.674602	0.240043	0	1	1	FALSE
ACFLL8_01260		273034	275106	+	691	TRAP transporter permease	1930.71	-0.880699	0.235679	0	1	1	1930.71	-0.475076	0.235653	0	1	1	FALSE
ACFLL8_01265		275292	276071	+	260	sulfite exporter TauE/SafE family protein	234.226	0.413417	0.238682	0	1	1	234.226	-0.293525	0.245263	0	1	1	FALSE
ACFLL8_01270		276215	277210	+	332	zinc-dependent alcohol dehydrogenase family protein	897.335	0.0427862	0.205035	0	1	1	897.335	0.109926	0.205588	0	1	1	FALSE
ACFLL8_01275		277276	277407	+	44	entericidin A/B family lipoprotein	220.382	-1.15881	0.363236	-0.4372	0.661966	1	220.382	0.0188246	0.359085	0	1	1	FALSE
ACFLL8_01280		277465	277596	+	44	entericidin A/B family lipoprotein	849.567	-2.19624	0.258566	-4.62645	3.7198e-06	4.07092e-05	849.567	0.33066	0.252857	0	1	1	FALSE
ACFLL8_01285		277749	277880	+	44	entericidin A/B family lipoprotein	26534.9	-1.19341	0.306359	-0.631326	0.527827	1	26534.9	-0.514852	0.306343	0	1	1	FALSE
ACFLL8_01290		278076	278963	+	296	LysR family transcriptional regulator	705.666	-2.47981	0.214044	-6.91358	4.72577e-12	1.06421e-10	705.666	-0.693916	0.208126	0	1	1	FALSE
ACFLL8_01295		279038	280111	-	358	rhodanese-related sulfurtransferase	448.405	0.411652	0.259927	0	1	1	448.405	-0.0302985	0.262217	0	1	1	FALSE
ACFLL8_01305		281342	283660	+	773	FdhF/YdeP family oxidoreductase	2863.32	1.01777	0.159743	0.111238	0.911427	1	2863.32	1.23989	0.159836	1.50084	0.133398	1	FALSE
ACFLL8_01310		283836	284276	+	147	VOC family protein	688.194	-0.387967	0.267339	0	1	1	688.194	0.341116	0.266678	0	1	1	FALSE
ACFLL8_01315		284579	285751	+	391	GGDEF domain-containing protein	3264.53	-0.223037	0.215718	0	1	1	3264.53	0.489239	0.21556	0	1	1	FALSE
ACFLL8_01320		285784	286494	-	237	phosphatase PAP2 family protein	1328.16	-0.997969	0.172938	0	1	1	1328.16	0.516827	0.170964	0	1	1	FALSE
ACFLL8_01325		286809	287330	+	174	META domain-containing protein	1359.41	-0.890446	0.23678	0	1	1	1359.41	0.149256	0.235985	0	1	1	FALSE
ACFLL8_01330		287445	290288	-	948	valine--tRNA ligase	2096.36	0.782074	0.201335	0	1	1	2096.36	-0.254573	0.202483	0	1	1	FALSE
ACFLL8_01335		290554	293526	+	991	ATP-binding protein	759.936	-0.396656	0.211179	0	1	1	759.936	-0.848407	0.213246	0	1	1	FALSE
ACFLL8_01340		293560	294030	-	157	DNA polymerase III subunit chi	199.901	-0.944798	0.218736	0	1	1	199.901	-0.688812	0.219894	0	1	1	FALSE
ACFLL8_01345		294209	295303	-	365	branched-chain amino acid aminotransferase	1361.75	0.240951	0.208376	0	1	1	1361.75	0.158656	0.208895	0	1	1	FALSE
ACFLL8_01350		295449	296969	-	507	leucyl aminopeptidase	2566.01	-0.578262	0.192252	0	1	1	2566.01	0.0261165	0.192084	0	1	1	FALSE
ACFLL8_01355	lptF	297464	298558	+	365	LPS export ABC transporter permease LptF	1218.11	1.06777	0.184874	0.366589	0.713926	1	1218.11	0.800349	0.185686	0	1	1	FALSE
ACFLL8_01360	lptG	298558	299640	+	361	LPS export ABC transporter permease LptG	1487.82	0.250749	0.175279	0	1	1	1487.82	0.661642	0.175239	0	1	1	FALSE
ACFLL8_01365		299654	300100	+	149	RDD family protein	1171.15	-0.604818	0.180731	0	1	1	1171.15	0.713006	0.179122	0	1	1	FALSE
ACFLL8_01370		300248	301072	-	275	hypothetical protein	2015.74	-0.432759	0.209281	0	1	1	2015.74	-1.17924	0.210439	-0.851758	0.394348	1	FALSE
ACFLL8_01375		301780	301983	+	68	bacterioferritin-associated ferredoxin	403.168	6.87069	1.01217	5.80013	6.62636e-09	1.04858e-07	403.168	1.27907	1.03386	0.269929	0.787215	1	FALSE
ACFLL8_01380	bfr	302452	302931	+	160	bacterioferritin	15083	0.599437	0.242869	0	1	1	15083	0.132517	0.242942	0	1	1	FALSE
ACFLL8_01385		303027	304148	-	374	5-%28carboxyamino%29imidazole ribonucleotide synthase	478.301	0.984951	0.205358	0	1	1	478.301	-0.149739	0.210503	0	1	1	FALSE
ACFLL8_01390	purE	304152	304670	-	173	5-%28carboxyamino%29imidazole ribonucleotide mutase	296.654	1.34524	0.225298	1.53237	0.125432	0.486898	296.654	0.0583097	0.233397	0	1	1	FALSE
ACFLL8_01395		304894	305151	-	86	DUF1653 domain-containing protein	135.677	0.223258	0.258847	0	1	1	135.677	-0.0685393	0.265087	0	1	1	FALSE
ACFLL8_01400	tcdA	305200	306063	-	288	tRNA cyclic N6-threonylcarbamoyladenosine%2837%29 synthase TcdA	197.54	-0.232052	0.271529	0	1	1	197.54	0.148336	0.271506	0	1	1	FALSE
ACFLL8_01405		306220	307011	-	264	pseudouridine synthase	164.318	-0.304371	0.283461	0	1	1	164.318	-0.313067	0.286434	0	1	1	FALSE
ACFLL8_01410		307250	308143	-	298	putative DNA-binding domain-containing protein	409.552	-0.995977	0.215259	0	1	1	409.552	0.63167	0.209542	0	1	1	FALSE
ACFLL8_01415		308140	309090	-	317	DUF692 domain-containing protein	585.68	0.775276	0.249782	0	1	1	585.68	0.953907	0.250167	0	1	1	FALSE
ACFLL8_01420		309244	309516	-	91	hypothetical protein	1864.42	3.47939	0.341732	7.25535	4.0063e-13	9.98164e-12	1864.42	0.342109	0.3445	0	1	1	FALSE
ACFLL8_01425		309824	312322	+	833	fatty acid cis/trans isomerase	972.932	-0.103514	0.190348	0	1	1	972.932	-0.0826141	0.191004	0	1	1	FALSE
ACFLL8_01430	fnr	312420	313169	-	250	fumarate/nitrate reduction transcriptional regulator Fnr	989.253	-1.51721	0.204746	-2.52609	0.0115341	0.0635099	989.253	0.265842	0.201553	0	1	1	FALSE
ACFLL8_01435		313526	313804	-	93	hypothetical protein	1149.75	-2.4027	0.242767	-5.77796	7.56115e-09	1.18582e-07	1149.75	0.485988	0.23699	0	1	1	FALSE
ACFLL8_01440		313801	314460	-	220	cbb3-type cytochrome c oxidase subunit II	1552.62	-2.00547	0.26876	-3.74116	0.00018317	0.00144279	1552.62	0.430582	0.266066	0	1	1	FALSE
ACFLL8_01445		314457	315896	-	480	cbb3-type cytochrome c oxidase subunit I	3207.29	-1.68644	0.213278	-3.21853	0.00128849	0.00866312	3207.29	0.179176	0.21223	0	1	1	FALSE
ACFLL8_01450		316047	316877	+	277	alpha/beta family hydrolase	397.012	-0.385534	0.208284	0	1	1	397.012	-0.1284	0.208799	0	1	1	FALSE
ACFLL8_01480		317798	318913	-	372	AraC family transcriptional regulator ligand-binding domain-containing protein	249.819	0.474503	0.215973	0	1	1	249.819	-0.288228	0.223106	0	1	1	FALSE
ACFLL8_01485		319232	321259	+	676	FAD-dependent oxidoreductase	1603.08	-1.16504	0.25229	-0.654178	0.512997	1	1603.08	0.24457	0.251235	0	1	1	FALSE
ACFLL8_01490		321478	322593	+	372	1-aminocyclopropane-1-carboxylate deaminase/D-cysteine desulfhydrase	2137.27	-2.28044	0.212518	-6.0251	1.69009e-09	2.91043e-08	2137.27	-0.709632	0.210967	0	1	1	FALSE
ACFLL8_01495		322805	323845	+	347	threonine aldolase family protein	1399.89	-1.17377	0.169482	-1.02533	0.305209	1	1399.89	-0.275115	0.168555	0	1	1	FALSE
ACFLL8_01500		324528	326450	+	641	PrkA family serine protein kinase	24165.5	-3.39521	0.318263	-7.52588	5.23647e-14	1.39361e-12	24165.5	-0.653933	0.317993	0	1	1	FALSE
ACFLL8_01505		326548	327831	+	428	YeaH/YhbH family protein	7134.84	-3.38372	0.327269	-7.28367	3.24848e-13	8.21001e-12	7134.84	-0.56157	0.326354	0	1	1	FALSE
ACFLL8_01510		327878	329452	+	525	SpoVR family protein	13985.2	-3.38443	0.339939	-7.0143	2.31108e-12	5.41256e-11	13985.2	-0.185111	0.339413	0	1	1	FALSE
ACFLL8_01515		329546	329863	-	106	high-potential iron-sulfur protein	860.303	-1.61965	0.298075	-2.07883	0.037633	0.176981	860.303	-0.101839	0.295981	0	1	1	FALSE
ACFLL8_01520		330318	331184	+	289	DNA/RNA non-specific endonuclease	708.945	-0.296025	0.185943	0	1	1	708.945	-0.596093	0.187878	0	1	1	FALSE
ACFLL8_01545	rnr	332421	335138	+	906	ribonuclease R	7946.74	-0.156748	0.203851	0	1	1	7946.74	-0.0139289	0.2039	0	1	1	FALSE
ACFLL8_01550	rlmB	335479	336234	+	252	23S rRNA %28guanosine%282251%29-2%27-O%29-methyltransferase RlmB	877.788	-0.424292	0.218256	0	1	1	877.788	-0.202712	0.218549	0	1	1	FALSE
ACFLL8_01555	rpsF	336493	336873	+	127	30S ribosomal protein S6	1215.52	3.07377	0.328504	6.31277	2.7408e-10	5.09442e-09	1215.52	-0.233031	0.333573	0	1	1	FALSE
ACFLL8_01560	rpsR	336900	337127	+	76	30S ribosomal protein S18	353.37	1.61352	0.275864	2.22398	0.0261499	0.128303	353.37	-0.27951	0.284553	0	1	1	FALSE
ACFLL8_01565		337140	337994	+	285	hypothetical protein	1413.96	1.67827	0.232208	2.92096	0.00348955	0.0217741	1413.96	-0.276949	0.234915	0	1	1	FALSE
ACFLL8_01570	rplI	338007	338453	+	149	50S ribosomal protein L9	2289.49	3.89012	0.380599	7.59359	3.11166e-14	8.54004e-13	2289.49	0.0504698	0.383826	0	1	1	FALSE
ACFLL8_01575	dnaB	338758	340137	+	460	replicative DNA helicase	1372.14	0.305522	0.220316	0	1	1	1372.14	0.0601387	0.220982	0	1	1	FALSE
ACFLL8_01580		340224	340511	+	96	hypothetical protein	703.943	0.788898	0.19992	0	1	1	703.943	-0.140701	0.203002	0	1	1	FALSE
ACFLL8_01585		340678	341934	+	419	EAL domain-containing protein	745.826	-3.21808	0.211996	-10.4628	1.27983e-25	9.99124e-24	745.826	-0.73659	0.200835	0	1	1	FALSE
ACFLL8_01590		342090	342446	+	119	DUF6482 family protein	1075.78	-3.31132	0.212747	-10.8642	1.70773e-27	1.53827e-25	1075.78	-0.618792	0.204006	0	1	1	FALSE
ACFLL8_01595		342448	342834	-	129	thiol-disulfide oxidoreductase DCC family protein	2087.33	-3.70669	0.295322	-9.16522	4.94475e-20	2.31612e-18	2087.33	-0.446118	0.290606	0	1	1	FALSE
ACFLL8_01600		342831	344507	-	559	cryptochrome/photolyase family protein	3818.8	-2.19372	0.281019	-4.24782	2.15863e-05	0.00020891	3818.8	-0.352366	0.280249	0	1	1	FALSE
ACFLL8_01605	hemH	344707	345696	+	330	ferrochelatase	719.87	-0.634005	0.198638	0	1	1	719.87	-0.172885	0.198417	0	1	1	FALSE
ACFLL8_01610		345893	346294	-	134	Na%2B/H%2B antiporter subunit G	183.171	1.12659	0.322774	0.392188	0.694919	1	183.171	0.687739	0.326726	0	1	1	FALSE
ACFLL8_01615		346313	346582	-	90	K%2B/H%2B antiporter subunit F	165.478	0.502021	0.287873	0	1	1	165.478	0.383181	0.291038	0	1	1	FALSE
ACFLL8_01620		346576	347076	-	167	Na%2B/H%2B antiporter subunit E	269.967	0.0433967	0.328366	0	1	1	269.967	0.267798	0.32892	0	1	1	FALSE
ACFLL8_01625		347073	348614	-	514	monovalent cation/H%2B antiporter subunit D	805.406	-0.0284269	0.264324	0	1	1	805.406	0.389895	0.26426	0	1	1	FALSE
ACFLL8_01630		348614	348964	-	117	Na%2B/H%2B antiporter subunit C	156.48	-0.363871	0.307532	0	1	1	156.48	0.512208	0.303982	0	1	1	FALSE
ACFLL8_01635		348964	351756	-	931	monovalent cation/H%2B antiporter subunit A	1746.67	0.0335361	0.268129	0	1	1	1746.67	0.155117	0.268308	0	1	1	FALSE
ACFLL8_01640		352459	353796	+	446	deoxyribodipyrimidine photo-lyase	11128	-1.4414	0.240604	-1.83455	0.0665731	0.283481	11128	-0.802553	0.240557	0	1	1	FALSE
ACFLL8_01645		353801	354526	-	242	16S rRNA %28uracil%281498%29-N%283%29%29-methyltransferase	1521.49	-1.73947	0.195652	-3.77952	0.00015713	0.00125455	1521.49	-0.933175	0.194907	0	1	1	FALSE
ACFLL8_01650	phaR	354725	355246	+	174	polyhydroxyalkanoate synthesis repressor PhaR	1898.57	0.771141	0.272135	0	1	1	1898.57	-0.171674	0.272994	0	1	1	FALSE
ACFLL8_01655	purD	355413	356705	+	431	phosphoribosylamine--glycine ligase	1434.07	0.335755	0.160531	0	1	1	1434.07	-0.26411	0.161978	0	1	1	FALSE
ACFLL8_01660		356973	357428	+	152	acyl-CoA thioesterase	1612.21	1.8125	0.235899	3.44429	0.00057256	0.00412175	1612.21	-0.108556	0.238139	0	1	1	FALSE
ACFLL8_01665		357428	358300	+	291	phosphoribulokinase	641.622	0.292622	0.240842	0	1	1	641.622	-0.468265	0.243464	0	1	1	FALSE
ACFLL8_01670		358329	359105	-	259	RIO1 family regulatory kinase/ATPase	693.28	0.185268	0.278645	0	1	1	693.28	-0.205958	0.279997	0	1	1	FALSE
ACFLL8_01675		359380	359721	+	114	histidine triad nucleotide-binding protein	3929.36	1.15698	0.231444	0.678256	0.49761	1	3929.36	0.27159	0.231875	0	1	1	FALSE
ACFLL8_01680	coq7	359983	360648	+	222	2-polyprenyl-3-methyl-6-methoxy-1%2C4-benzoquinone monooxygenase	1134.45	-0.135083	0.20089	0	1	1	1134.45	-0.373295	0.201857	0	1	1	FALSE
ACFLL8_01685		360764	361117	-	118	hypothetical protein	3373.26	0.545546	0.335751	0	1	1	3373.26	-0.307966	0.336126	0	1	1	FALSE
ACFLL8_01690		361391	362212	-	274	hypothetical protein	1480.96	0.569509	0.264472	0	1	1	1480.96	-0.38368	0.265664	0	1	1	FALSE
ACFLL8_01695		362467	362946	+	160	PepSY domain-containing protein	213.494	0.252034	0.24495	0	1	1	213.494	-0.612961	0.253584	0	1	1	FALSE
ACFLL8_01700		363037	363756	+	240	response regulator transcription factor	682.011	-0.244649	0.180629	0	1	1	682.011	0.00107872	0.180995	0	1	1	FALSE
ACFLL8_01705		363753	365117	+	455	sensor histidine kinase	806.695	0.406317	0.230422	0	1	1	806.695	-0.0379293	0.231865	0	1	1	FALSE
ACFLL8_01710		365517	366188	+	224	ankyrin repeat domain-containing protein	1366.7	-2.10189	0.390731	-2.82007	0.00480128	0.0288323	1366.7	-0.369117	0.38934	0	1	1	FALSE
ACFLL8_01715		366215	366712	+	166	DUF3592 domain-containing protein	752.086	-1.23744	0.384835	-0.616991	0.53724	1	752.086	-0.303681	0.384011	0	1	1	FALSE
ACFLL8_01720		366792	367331	+	180	TIGR02281 family clan AA aspartic protease	474.592	-0.350787	0.351377	0	1	1	474.592	-0.0610075	0.35156	0	1	1	FALSE
ACFLL8_01725	gnd	367484	368467	-	328	phosphogluconate dehydrogenase %28NAD%28%2B%29-dependent%2C decarboxylating%29	402.689	0.157502	0.202518	0	1	1	402.689	0.0808526	0.204326	0	1	1	FALSE
ACFLL8_01730		368636	369889	-	418	ribonucleotide-diphosphate reductase subunit beta	1314.8	-0.350368	0.233501	0	1	1	1314.8	0.43423	0.233048	0	1	1	FALSE
ACFLL8_01735		370171	373071	-	967	ribonucleoside-diphosphate reductase subunit alpha	4833.02	-0.402345	0.225764	0	1	1	4833.02	0.587734	0.225571	0	1	1	FALSE
ACFLL8_01740		373689	374399	+	237	response regulator	3597.85	0.710025	0.212405	0	1	1	3597.85	0.559606	0.21261	0	1	1	FALSE
ACFLL8_01745		374403	376064	+	554	HAMP domain-containing histidine kinase	3358.37	-0.364423	0.192772	0	1	1	3358.37	0.404278	0.192565	0	1	1	FALSE
ACFLL8_01750		376130	376594	+	155	lipocalin-like domain-containing protein	2073.22	-0.746175	0.211283	0	1	1	2073.22	0.447378	0.21059	0	1	1	FALSE
ACFLL8_01755		376809	377015	+	69	cold-shock protein	22489	2.88423	0.403917	4.66488	3.08791e-06	3.42202e-05	22489	1.16413	0.403991	0.406269	0.684545	1	FALSE
ACFLL8_01760		377246	378157	-	304	LysR family transcriptional regulator	412.343	-0.356565	0.184823	0	1	1	412.343	0.144329	0.184258	0	1	1	FALSE
ACFLL8_01765		378536	379717	+	394	MliC family protein	1028.61	-0.151813	0.2446	0	1	1	1028.61	-0.268155	0.245291	0	1	1	FALSE
ACFLL8_01770		379883	380503	+	207	FMN-dependent NADH-azoreductase	619.893	0.46681	0.200917	0	1	1	619.893	0.0583157	0.202936	0	1	1	FALSE
ACFLL8_01775		380646	381272	-	209	IMPACT family protein	418.85	-0.341386	0.254772	0	1	1	418.85	-0.0702119	0.25512	0	1	1	FALSE
ACFLL8_01780		381299	381775	-	159	LexA family protein	2234.4	0.62137	0.169755	0	1	1	2234.4	-0.0162723	0.170622	0	1	1	FALSE
ACFLL8_01785	ccmA	382254	382967	+	238	cytochrome c biogenesis heme-transporting ATPase CcmA	1178.86	0.359397	0.171267	0	1	1	1178.86	-0.195896	0.17282	0	1	1	FALSE
ACFLL8_01790	ccmB	382964	383686	+	241	heme exporter protein CcmB	447.374	0.456681	0.183784	0	1	1	447.374	0.147914	0.186409	0	1	1	FALSE
ACFLL8_01795		383837	384634	+	266	heme ABC transporter permease	344.32	0.842723	0.20501	0	1	1	344.32	0.315556	0.208888	0	1	1	FALSE
ACFLL8_01800	ccmD	384634	384828	+	65	heme exporter protein CcmD	28.8745	0.322751	0.415971	0	1	1	28.8745	-0.223248	0.44129	0	1	1	FALSE
ACFLL8_01805	ccmE	384910	385407	+	166	cytochrome c maturation protein CcmE	209.207	0.656521	0.216704	0	1	1	209.207	-0.325014	0.226863	0	1	1	FALSE
ACFLL8_01810		385407	387407	+	667	heme lyase CcmF/NrfE family subunit	423.085	0.460309	0.230808	0	1	1	423.085	-0.0665769	0.233831	0	1	1	FALSE
ACFLL8_01815		387404	387973	+	190	DsbE family thiol:disulfide interchange protein	147.48	0.301226	0.252514	0	1	1	147.48	0.0805127	0.257639	0	1	1	FALSE
ACFLL8_01820		387970	388503	+	178	cytochrome c-type biogenesis protein CcmH	125.512	-0.217579	0.265717	0	1	1	125.512	-0.0375143	0.267746	0	1	1	FALSE
ACFLL8_01825	ccmI	388500	389837	+	446	c-type cytochrome biogenesis protein CcmI	539.23	-0.150716	0.181613	0	1	1	539.23	0.193531	0.181723	0	1	1	FALSE
ACFLL8_01830	smc	390088	393606	+	1173	chromosome segregation protein SMC	2384.98	1.34917	0.198896	1.75553	0.0791686	0.329916	2384.98	0.108763	0.20001	0	1	1	FALSE
ACFLL8_01835		393866	395125	+	420	cell division protein ZipA C-terminal FtsZ-binding domain-containing protein	13091.2	-0.390672	0.199088	0	1	1	13091.2	0.166999	0.199064	0	1	1	FALSE
ACFLL8_01840	ligA	395547	397661	+	705	NAD-dependent DNA ligase LigA	934.757	0.611091	0.203691	0	1	1	934.757	-0.0395665	0.205447	0	1	1	FALSE
ACFLL8_01845		397736	398038	+	101	YheU family protein	1336.9	1.82792	0.265543	3.11784	0.00182182	0.0120984	1336.9	0.104371	0.267607	0	1	1	FALSE
ACFLL8_01850		398207	399517	-	437	2-hydroxycarboxylate transporter family protein	113.676	-0.113406	0.27377	0	1	1	113.676	0.0217816	0.276383	0	1	1	FALSE
ACFLL8_01855		399787	401571	+	595	ATP-binding protein	315.416	-0.197258	0.21905	0	1	1	315.416	0.280093	0.218563	0	1	1	FALSE
ACFLL8_01860		401635	402372	+	246	response regulator	382.719	-1.13293	0.2377	-0.559253	0.575989	1	382.719	-0.0680153	0.234571	0	1	1	FALSE
ACFLL8_01865	mnmC	402435	404783	-	783	FAD-dependent 5-carboxymethylaminomethyl-2-thiouridine%2834%29 oxidoreductase MnmC	537.011	-1.29538	0.238051	-1.24081	0.214677	0.764869	537.011	-0.077179	0.235214	0	1	1	FALSE
ACFLL8_01870		404927	405226	-	100	YciI family protein	185.449	-0.0251838	0.22236	0	1	1	185.449	-0.050715	0.225633	0	1	1	FALSE
ACFLL8_01875		405226	405807	-	194	septation protein A	958.971	1.28402	0.263044	1.07974	0.280257	0.949413	958.971	0.0806613	0.26509	0	1	1	FALSE
ACFLL8_01880		406063	407067	+	335	PHP domain-containing protein	491.679	-0.240791	0.178783	0	1	1	491.679	-0.084933	0.179655	0	1	1	FALSE
ACFLL8_01885		407198	407821	+	208	L-threonylcarbamoyladenylate synthase	1531.66	-0.573878	0.250522	0	1	1	1531.66	-0.17575	0.250501	0	1	1	FALSE
ACFLL8_01890		407997	408806	+	270	5%27-nucleotidase%2C lipoprotein e%28P4%29 family	1225.9	-0.400068	0.191547	0	1	1	1225.9	-0.916516	0.193095	0	1	1	FALSE
ACFLL8_01895		408911	409939	-	343	ion transporter	218.104	0.307093	0.225022	0	1	1	218.104	-0.0701054	0.230046	0	1	1	FALSE
ACFLL8_01900		410118	411125	-	336	CYTH domain-containing protein	735.779	0.158079	0.174484	0	1	1	735.779	0.593474	0.174341	0	1	1	FALSE
ACFLL8_01905		411606	412286	+	227	TIGR00153 family protein	686.95	1.4966	0.236947	2.09582	0.0360982	0.171833	686.95	0.137443	0.240445	0	1	1	FALSE
ACFLL8_01910		412328	413611	+	428	inorganic phosphate transporter	564.183	1.23343	0.226226	1.03184	0.302149	1	564.183	0.336324	0.22928	0	1	1	FALSE
ACFLL8_01915	argA	413913	415223	+	437	amino-acid N-acetyltransferase	883.26	-0.253265	0.225857	0	1	1	883.26	-0.262452	0.226547	0	1	1	FALSE
ACFLL8_01920		416455	417951	+	499	sensor histidine kinase	1639.85	-0.124669	0.193151	0	1	1	1639.85	-0.524348	0.194053	0	1	1	FALSE
ACFLL8_01925		417996	418562	+	189	hypothetical protein	877.896	0.859014	0.218204	0	1	1	877.896	-0.0687197	0.220441	0	1	1	FALSE
ACFLL8_01930	glrR	418684	420051	+	456	two-component system response regulator GlrR	2214.51	-0.690744	0.182309	0	1	1	2214.51	-0.141742	0.182148	0	1	1	FALSE
ACFLL8_01935	xseA	420389	421759	-	457	exodeoxyribonuclease VII large subunit	340.235	1.10423	0.203054	0.513335	0.607717	1	340.235	-0.0264776	0.210156	0	1	1	FALSE
ACFLL8_01940		421921	423423	-	501	tripartite tricarboxylate transporter permease	203.946	-0.12581	0.292616	0	1	1	203.946	-0.0739328	0.294475	0	1	1	FALSE
ACFLL8_01945		423442	423882	-	147	tripartite tricarboxylate transporter TctB family protein	20.3942	-1.08799	0.55444	-0.1587	0.873905	1	20.3942	-0.558963	0.548768	0	1	1	FALSE
ACFLL8_01950		423879	424904	-	342	Bug family tripartite tricarboxylate transporter substrate binding protein	132.109	-0.675644	0.339605	0	1	1	132.109	-0.0985892	0.337934	0	1	1	FALSE
ACFLL8_01955		425084	425755	+	224	response regulator	587.001	-0.171558	0.202413	0	1	1	587.001	0.173174	0.202503	0	1	1	FALSE
ACFLL8_01960		425752	427140	+	463	sensor histidine kinase	1214.93	-0.623612	0.189917	0	1	1	1214.93	0.26645	0.18911	0	1	1	FALSE
ACFLL8_01965		427200	428231	+	344	ABC transporter substrate-binding protein	427.015	-0.292358	0.197514	0	1	1	427.015	0.288194	0.196692	0	1	1	FALSE
ACFLL8_01970	guaB	428485	429954	+	490	IMP dehydrogenase	1448.07	1.07402	0.23735	0.311863	0.755145	1	1448.07	-0.631917	0.239705	0	1	1	FALSE
ACFLL8_01975	guaA	430120	431694	+	525	glutamine-hydrolyzing GMP synthase	290.755	0.231179	0.224997	0	1	1	290.755	-0.30205	0.22976	0	1	1	FALSE
ACFLL8_01980		431868	432485	-	206	hypothetical protein	54.4565	-0.549698	0.318435	0	1	1	54.4565	-0.27563	0.320638	0	1	1	FALSE
ACFLL8_01985		432482	433558	-	359	DUF3500 domain-containing protein	250.696	0.351103	0.273915	0	1	1	250.696	0.0380787	0.277152	0	1	1	FALSE
ACFLL8_01990		433818	434708	-	297	pseudouridine synthase	156.741	0.90379	0.230448	0	1	1	156.741	0.159172	0.240013	0	1	1	FALSE
ACFLL8_01995		435016	436296	+	427	NAD%28P%29-binding domain-containing protein	1110.09	-0.392295	0.342336	0	1	1	1110.09	0.658217	0.341727	0	1	1	FALSE
ACFLL8_02000		436418	436732	-	105	hypothetical protein	1403.71	-1.39351	0.259433	-1.51682	0.129312	0.498105	1403.71	-1.17134	0.259642	-0.659918	0.509307	1	FALSE
ACFLL8_02005		436949	437410	-	154	hypothetical protein	156.104	-0.284356	0.27616	0	1	1	156.104	0.387144	0.273849	0	1	1	FALSE
ACFLL8_02010		437706	438146	+	147	hypothetical protein	126.268	1.01604	0.268375	0.0597514	0.952354	1	126.268	0.472904	0.276343	0	1	1	FALSE
ACFLL8_02015		438484	440013	-	510	hypothetical protein	360.129	-2.28829	0.217141	-5.93297	2.97503e-09	4.95321e-08	360.129	-0.3708	0.205412	0	1	1	FALSE
ACFLL8_02020	dbpA	440849	442249	+	467	ATP-dependent RNA helicase DbpA	353.778	-0.124369	0.245	0	1	1	353.778	-0.280829	0.247163	0	1	1	FALSE
ACFLL8_02025		442474	443046	+	191	GNAT family N-acetyltransferase	1135.04	-0.711912	0.291368	0	1	1	1135.04	0.336254	0.290619	0	1	1	FALSE
ACFLL8_02030		443274	443441	+	56	hypothetical protein	6853.04	1.80948	0.352788	2.29452	0.0217608	0.109678	6853.04	0.231383	0.35306	0	1	1	FALSE
ACFLL8_02035		443612	444970	-	453	NarK family nitrate/nitrite MFS transporter	27455.5	-3.5224	0.348382	-7.24033	4.47601e-13	1.10734e-11	27455.5	-0.205853	0.348093	0	1	1	FALSE
ACFLL8_02040		445580	446155	+	192	ANTAR domain-containing response regulator	2826.48	-2.14145	0.250662	-4.55374	5.26996e-06	5.61011e-05	2826.48	-0.787574	0.249879	0	1	1	FALSE
ACFLL8_02045		446206	447414	+	403	CmpA/NrtA family ABC transporter substrate-binding protein	4049.52	-2.73994	0.525599	-3.31039	0.00093166	0.00644275	4049.52	-0.331357	0.524948	0	1	1	FALSE
ACFLL8_02050		447571	448191	+	207	TetR family transcriptional regulator C-terminal domain-containing protein	2388.68	0.0972519	0.233857	0	1	1	2388.68	-0.410356	0.23442	0	1	1	FALSE
ACFLL8_02055	preA	448375	449739	-	455	NAD-dependent dihydropyrimidine dehydrogenase subunit PreA	1840.18	-1.47327	0.448779	-1.05457	0.291622	0.976744	1840.18	0.938746	0.447601	0	1	1	FALSE
ACFLL8_02060		449739	451130	-	464	NAD%28P%29-dependent oxidoreductase	1297.78	-2.45663	0.380617	-3.82701	0.00012971	0.00104991	1297.78	0.937409	0.376335	0	1	1	FALSE
ACFLL8_02065	hydA	451330	452772	-	481	dihydropyrimidinase	1002.98	-1.15579	0.345914	-0.450368	0.652445	1	1002.98	0.912098	0.343823	0	1	1	FALSE
ACFLL8_02070		452855	453691	-	279	nitrilase-related carbon-nitrogen hydrolase	687.395	1.31483	0.319381	0.985742	0.32426	1	687.395	1.09567	0.320123	0.298859	0.765048	1	FALSE
ACFLL8_02075		454526	456052	+	509	NCS1 family nucleobase:cation symporter-1	10553.2	-1.51478	0.281484	-1.8288	0.0674296	0.286087	10553.2	0.532278	0.281223	0	1	1	FALSE
ACFLL8_02080		456178	457071	-	298	LysR family transcriptional regulator	844.962	-1.9372	0.252801	-3.70724	0.00020953	0.0016249	844.962	0.437765	0.247791	0	1	1	FALSE
ACFLL8_02085		457311	458420	+	370	S-%28hydroxymethyl%29glutathione dehydrogenase/class III alcohol dehydrogenase	3600.34	0.731234	0.315744	0	1	1	3600.34	0.613224	0.315872	0	1	1	FALSE
ACFLL8_02090	fghA	458554	459417	+	288	S-formylglutathione hydrolase	5285.09	1.40724	0.369452	1.10229	0.270334	0.923816	5285.09	1.01598	0.36956	0.0432409	0.965509	1	FALSE
ACFLL8_02095		460108	461397	+	430	GlxA family transcriptional regulator	3196.55	1.89596	0.38477	2.32857	0.0198821	0.101965	3196.55	3.20602	0.384565	5.7364	9.67081e-09	1.78808e-06	FALSE
ACFLL8_02100	mtgA	461687	462448	+	254	monofunctional biosynthetic peptidoglycan transglycosylase	340.298	1.43472	0.282196	1.5405	0.123438	0.481286	340.298	1.36241	0.283437	1.27861	0.201034	1	FALSE
ACFLL8_02105		462697	463707	+	337	dipeptidase	89.5969	-0.253858	0.38952	0	1	1	89.5969	1.35047	0.377204	0.929119	0.352828	1	FALSE
ACFLL8_02110		463831	464367	+	179	DUF5943 domain-containing protein	44.1658	0.037534	0.463376	0	1	1	44.1658	1.39691	0.447701	0.886552	0.37532	1	FALSE
ACFLL8_02115	dgcA	464641	466719	+	693	dimethylglycine demethylation protein DgcA	125.281	-0.655661	0.37715	0	1	1	125.281	1.48816	0.362126	1.34804	0.177644	1	FALSE
ACFLL8_02120		466752	468941	+	730	%28Fe-S%29-binding protein	226.314	0.150258	0.325393	0	1	1	226.314	2.06456	0.31819	3.34566	0.00082086	0.0640815	FALSE
ACFLL8_02125		468938	470458	+	507	FAD-binding protein	173.855	-0.0141543	0.328537	0	1	1	173.855	2.30363	0.315507	4.13186	3.59846e-05	0.00407787	FALSE
ACFLL8_02130		470492	471385	+	298	electron transfer flavoprotein subunit beta	126.072	0.674602	0.430987	0	1	1	126.072	2.97718	0.418249	4.72728	2.27546e-06	0.00033307	FALSE
ACFLL8_02135		471452	472159	-	236	DUF4174 domain-containing protein	768.177	-1.00975	0.190113	-0.0512855	0.959098	1	768.177	0.692712	0.18644	0	1	1	FALSE
ACFLL8_02140		472600	472992	+	131	DUF4168 domain-containing protein	658.62	-2.00819	0.198789	-5.07166	3.94366e-07	4.96562e-06	658.62	0.195845	0.191197	0	1	1	FALSE
ACFLL8_02145		473090	474679	-	530	BCCT family transporter	82.6683	-0.867052	0.30251	0	1	1	82.6683	0.103304	0.293312	0	1	1	FALSE
ACFLL8_02150		475115	476878	+	588	NADH-ubiquinone oxidoreductase-F iron-sulfur binding region domain-containing protein	373.464	0.869707	0.236582	0	1	1	373.464	0.805475	0.238006	0	1	1	FALSE
ACFLL8_02155		476875	479907	+	1011	molybdopterin-dependent oxidoreductase	886.457	0.265212	0.171914	0	1	1	886.457	0.718386	0.17176	0	1	1	FALSE
ACFLL8_02160		480130	480369	+	80	hypothetical protein	3567.83	0.467878	0.296976	0	1	1	3567.83	0.622527	0.297038	0	1	1	FALSE
ACFLL8_02165		480532	481170	-	213	flavin reductase family protein	472.784	-0.946639	0.418303	0	1	1	472.784	-0.385587	0.417925	0	1	1	FALSE
ACFLL8_02170	cyoA	482551	483519	+	323	ubiquinol oxidase subunit II	3773.03	0.57258	0.392962	0	1	1	3773.03	-0.588871	0.393346	0	1	1	FALSE
ACFLL8_02175	cyoB	483523	485532	+	670	cytochrome o ubiquinol oxidase subunit I	6172.08	-0.368955	0.389918	0	1	1	6172.08	-0.84131	0.39006	0	1	1	FALSE
ACFLL8_02180	cyoC	485535	486161	+	209	cytochrome o ubiquinol oxidase subunit III	1528.27	0.135826	0.266215	0	1	1	1528.27	-0.570149	0.267192	0	1	1	FALSE
ACFLL8_02185	cyoD	486158	486487	+	110	cytochrome o ubiquinol oxidase subunit IV	1488.27	0.446818	0.302509	0	1	1	1488.27	-0.639275	0.30372	0	1	1	FALSE
ACFLL8_02190	cyoE	486501	487355	+	285	heme o synthase	1426.97	-0.306964	0.307394	0	1	1	1426.97	-0.590043	0.307964	0	1	1	FALSE
ACFLL8_02195		487493	488776	-	428	SRPBCC family protein	352.243	0.00828222	0.301944	0	1	1	352.243	2.53447	0.293873	5.22156	1.77423e-07	2.83312e-05	FALSE
ACFLL8_02200		489434	490543	+	370	FAD-binding oxidoreductase	145.866	0.881798	0.355812	0	1	1	145.866	2.59617	0.347797	4.58937	4.44577e-06	0.00060069	FALSE
ACFLL8_02205	nhaC	490743	492272	+	510	Na%2B/H%2B antiporter NhaC	510.718	0.469602	0.294766	0	1	1	510.718	2.22485	0.291809	4.19744	2.69945e-05	0.00316106	FALSE
ACFLL8_02210		492817	493710	-	298	AEC family transporter	257.739	-0.573329	0.267983	0	1	1	257.739	-0.0063872	0.266979	0	1	1	FALSE
ACFLL8_02215	glyA	493991	495301	+	437	serine hydroxymethyltransferase	147.605	1.03289	0.309473	0.106268	0.91537	1	147.605	2.09523	0.305265	3.5878	0.00033347	0.028573	FALSE
ACFLL8_02220		495418	496668	+	417	sarcosine oxidase subunit beta family protein	158.193	-0.698342	0.335935	0	1	1	158.193	1.54298	0.321488	1.68895	0.0912281	1	FALSE
ACFLL8_02225		496694	497020	+	109	sarcosine oxidase subunit delta	35.575	-1.28751	0.463868	-0.619805	0.535386	1	35.575	1.62585	0.378753	1.65239	0.0984557	1	FALSE
ACFLL8_02230		497017	500124	+	1036	sarcosine oxidase subunit alpha family protein	1265.21	-1.11913	0.24372	-0.488789	0.624991	1	1265.21	0.708291	0.241761	0	1	1	FALSE
ACFLL8_02235		500117	500818	+	234	sarcosine oxidase subunit gamma	241.487	-1.64932	0.351225	-1.84874	0.0644953	0.275971	241.487	1.30249	0.3344	0.904575	0.365691	1	FALSE
ACFLL8_02240	purU	501040	501915	+	292	formyltetrahydrofolate deformylase	686.338	-0.674735	0.213455	0	1	1	686.338	1.02919	0.210037	0.138954	0.889487	1	FALSE
ACFLL8_02245	fhuB	502091	504214	-	708	Fe%283%2B%29-hydroxamate ABC transporter permease FhuB	396.718	0.10218	0.282178	0	1	1	396.718	0.600385	0.281837	0	1	1	FALSE
ACFLL8_02250		504201	505226	-	342	ABC transporter substrate-binding protein	115.3	-0.23464	0.372662	0	1	1	115.3	0.25943	0.371741	0	1	1	FALSE
ACFLL8_02255		505223	505990	-	256	ABC transporter ATP-binding protein	90.8212	1.44977	0.439983	1.02224	0.306666	1	90.8212	-0.0589581	0.456035	0	1	1	FALSE
ACFLL8_02260		506037	506606	-	190	RNA polymerase sigma factor	64.6372	1.2918	0.408214	0.714821	0.47472	1	64.6372	0.361469	0.423194	0	1	1	FALSE
ACFLL8_02265		506954	509635	-	894	GNAT family N-acetyltransferase	261.489	-1.12106	0.205294	-0.589704	0.555389	1	261.489	-0.262661	0.201548	0	1	1	FALSE
ACFLL8_02270		509632	511182	-	517	lysine N%286%29-hydroxylase/L-ornithine N%285%29-oxygenase family protein	240.249	-1.64388	0.255104	-2.52398	0.0116035	0.0636926	240.249	-0.340176	0.247813	0	1	1	FALSE
ACFLL8_02275		511175	512863	-	563	pyridoxal phosphate-dependent decarboxylase family protein	256.541	-1.44632	0.221375	-2.01612	0.0437873	0.201166	256.541	-0.129593	0.213874	0	1	1	FALSE
ACFLL8_02280		513225	515357	-	711	TonB-dependent siderophore receptor	466.444	0.481299	0.38193	0	1	1	466.444	0.37334	0.382765	0	1	1	FALSE
ACFLL8_02285		515656	516297	-	214	hypothetical protein	272.446	-1.12625	0.255596	-0.493928	0.621357	1	272.446	0.430284	0.248582	0	1	1	FALSE
ACFLL8_02295		516931	517488	-	186	PRC-barrel domain-containing protein	3392.62	-0.802021	0.335673	0	1	1	3392.62	0.355259	0.335415	0	1	1	FALSE
ACFLL8_02300		518075	518221	-	49	hypothetical protein	10698.7	0.140951	0.333661	0	1	1	10698.7	0.158061	0.333693	0	1	1	FALSE
ACFLL8_02305		518247	518480	+	78	hypothetical protein	25562.2	-1.68643	0.287004	-2.3917	0.0167707	0.0889962	25562.2	-0.0526914	0.286922	0	1	1	FALSE
ACFLL8_02310		519082	519375	+	98	hypothetical protein	2679.17	-0.538315	0.182241	0	1	1	2679.17	-0.185624	0.182259	0	1	1	FALSE
ACFLL8_02315		519661	519888	+	76	hypothetical protein	604.225	-1.13929	0.225614	-0.617384	0.536982	1	604.225	-0.313328	0.224231	0	1	1	FALSE
ACFLL8_02320		519983	521596	-	538	peptidoglycan DD-metalloendopeptidase family protein	3750.41	1.62818	0.195687	3.21012	0.0013268	0.00887822	3750.41	0.2553	0.196462	0	1	1	FALSE
ACFLL8_02325		522140	523027	+	296	LysR family transcriptional regulator	534.937	-0.388842	0.184766	0	1	1	534.937	0.233357	0.183905	0	1	1	FALSE
ACFLL8_02330		523185	524195	+	337	glutathione S-transferase family protein	609.771	-0.718779	0.190715	0	1	1	609.771	0.478474	0.188099	0	1	1	FALSE
ACFLL8_02335		524227	524733	-	169	YaiI/YqxD family protein	178.332	-1.3788	0.245603	-1.54234	0.122991	0.480073	178.332	0.286782	0.232387	0	1	1	FALSE
ACFLL8_02340		525311	527008	+	566	DEAD/DEAH box helicase	1977.87	-0.435552	0.345714	0	1	1	1977.87	-1.13476	0.346392	-0.389033	0.697252	1	FALSE
ACFLL8_02345		527187	527759	+	191	PRC-barrel domain-containing protein	89.7053	-1.05352	0.285774	-0.187288	0.851434	1	89.7053	-0.589121	0.284341	0	1	1	FALSE
ACFLL8_02350	nfi	527813	528580	+	256	deoxyribonuclease V	756.131	-1.29666	0.251264	-1.18066	0.237736	0.833501	756.131	-0.0773609	0.249355	0	1	1	FALSE
ACFLL8_02355		528662	532207	-	1182	AAA family ATPase	1603.59	-0.979515	0.24578	0	1	1	1603.59	-0.208215	0.245378	0	1	1	FALSE
ACFLL8_02360		532204	533601	-	466	exonuclease SbcCD subunit D C-terminal domain-containing protein	290.284	0.206665	0.303214	0	1	1	290.284	0.202809	0.304596	0	1	1	FALSE
ACFLL8_02365		533960	534379	+	140	DUF1499 domain-containing protein	9887.81	-2.61461	0.248411	-6.49974	8.04576e-11	1.61513e-09	9887.81	-0.308527	0.247899	0	1	1	FALSE
ACFLL8_02370		534902	536242	+	447	MFS transporter	868.921	-1.22979	0.228648	-1.00499	0.314902	1	868.921	-0.394656	0.227654	0	1	1	FALSE
ACFLL8_02375	recC	536453	540490	+	1346	exodeoxyribonuclease V subunit gamma	1402.62	0.292494	0.192879	0	1	1	1402.62	0.334991	0.193266	0	1	1	FALSE
ACFLL8_02380		540487	544746	+	1420	UvrD-helicase domain-containing protein	862.757	-0.0584818	0.209483	0	1	1	862.757	0.242402	0.209621	0	1	1	FALSE
ACFLL8_02385	recD	544739	546898	+	720	exodeoxyribonuclease V subunit alpha	948.966	0.762442	0.258689	0	1	1	948.966	0.239189	0.259824	0	1	1	FALSE
ACFLL8_02390	nosP	547011	548201	+	397	nitric oxide-sensing protein NosP	491.804	0.345493	0.261558	0	1	1	491.804	0.364682	0.26242	0	1	1	FALSE
ACFLL8_02395		548191	549621	+	477	hybrid sensor histidine kinase/response regulator	314.859	-0.014408	0.268018	0	1	1	314.859	0.0360584	0.269306	0	1	1	FALSE
ACFLL8_02400		549846	551162	+	439	Nramp family divalent metal transporter	866.651	-1.15626	0.208913	-0.747976	0.454475	1	866.651	-0.281301	0.207757	0	1	1	FALSE
ACFLL8_02405		551213	552019	-	269	response regulator	1023.22	-0.285187	0.338184	0	1	1	1023.22	-0.37987	0.33868	0	1	1	FALSE
ACFLL8_02410		552459	553979	+	507	aldehyde dehydrogenase family protein	1397.78	0.303892	0.3278	0	1	1	1397.78	0.161525	0.328162	0	1	1	FALSE
ACFLL8_02415	adhP	554250	555278	+	343	alcohol dehydrogenase AdhP	4183.64	-1.36292	0.190991	-1.90019	0.0574077	0.252407	4183.64	-0.0175768	0.190462	0	1	1	FALSE
ACFLL8_02420		555466	555957	-	164	pyridoxamine 5%27-phosphate oxidase family protein	1058.7	0.47612	0.263101	0	1	1	1058.7	-0.382499	0.264654	0	1	1	FALSE
ACFLL8_02425		556149	556640	-	164	CreA family protein	222.5	-0.5057	0.245854	0	1	1	222.5	-0.342905	0.247307	0	1	1	FALSE
ACFLL8_02430		556714	557055	-	114	DOPA 4%2C5-dioxygenase family protein	68.5335	-0.292052	0.362049	0	1	1	68.5335	0.416177	0.357538	0	1	1	FALSE
ACFLL8_02435		557156	557926	-	257	sulfite exporter TauE/SafE family protein	386.897	0.498005	0.199231	0	1	1	386.897	0.044709	0.20267	0	1	1	FALSE
ACFLL8_02440		558237	559262	+	342	succinylglutamate desuccinylase/aspartoacylase family protein	987.528	0.843172	0.227611	0	1	1	987.528	0.501508	0.228559	0	1	1	FALSE
ACFLL8_02445		559407	560804	-	466	peptide MFS transporter	166.789	2.19836	0.276115	4.34008	1.42432e-05	0.00014255	166.789	0.273928	0.293394	0	1	1	FALSE
ACFLL8_02450	dusA	561273	562280	-	336	tRNA dihydrouridine%2820/20a%29 synthase DusA	378.182	1.25912	0.21273	1.21807	0.223197	0.789619	378.182	-0.091941	0.219936	0	1	1	FALSE
ACFLL8_02455		562429	563046	-	206	TetR/AcrR family transcriptional regulator	153.305	0.0019854	0.229174	0	1	1	153.305	-0.0203902	0.232954	0	1	1	FALSE
ACFLL8_02460		563320	563874	+	185	carboxymuconolactone decarboxylase family protein	176.254	1.92293	0.266722	3.46026	0.00053965	0.00390082	176.254	0.452391	0.279084	0	1	1	FALSE
ACFLL8_02465	corA	564658	565710	+	351	magnesium/cobalt transporter CorA	287.807	1.14006	0.236397	0.59248	0.553529	1	287.807	-0.212783	0.245093	0	1	1	FALSE
ACFLL8_02470		566145	567044	+	300	LysR family transcriptional regulator	585.643	-0.884406	0.181593	0	1	1	585.643	-0.372727	0.181086	0	1	1	FALSE
ACFLL8_02475		567063	567947	-	295	short-chain dehydrogenase	388.047	-3.00815	0.224306	-8.95272	3.46817e-19	1.5823e-17	388.047	-1.03574	0.20981	-0.170329	0.864751	1	FALSE
ACFLL8_02480	cydC	567973	569796	-	608	thiol reductant ABC exporter subunit CydC	617.288	-1.5448	0.236354	-2.30503	0.0211649	0.107445	617.288	-1.1919	0.236436	-0.811632	0.417003	1	FALSE
ACFLL8_02485	cydD	569793	571604	-	604	thiol reductant ABC exporter subunit CydD	587.334	-1.13773	0.211645	-0.650757	0.515204	1	587.334	-0.712229	0.211473	0	1	1	FALSE
ACFLL8_02490	gltX	571906	573381	+	492	glutamate--tRNA ligase	832.089	0.607237	0.260443	0	1	1	832.089	0.135787	0.261679	0	1	1	FALSE
ACFLL8_02505		574323	575210	-	296	NAD%28P%29-dependent oxidoreductase	2020.91	0.382514	0.210854	0	1	1	2020.91	0.133278	0.211322	0	1	1	FALSE
ACFLL8_02510	gltA	575450	576736	-	429	citrate synthase	2189.36	1.15087	0.244304	0.617546	0.536875	1	2189.36	-0.106313	0.245339	0	1	1	FALSE
ACFLL8_02515	sdhC	577128	577505	+	126	succinate dehydrogenase%2C cytochrome b556 subunit	846.635	1.77291	0.404623	1.9102	0.0561068	0.247915	846.635	-0.105513	0.407048	0	1	1	FALSE
ACFLL8_02520	sdhD	577499	577846	+	116	succinate dehydrogenase%2C hydrophobic membrane anchor protein	809.576	1.48948	0.343821	1.42365	0.154547	0.580684	809.576	-0.136516	0.346373	0	1	1	FALSE
ACFLL8_02525	sdhA	577850	579622	+	591	succinate dehydrogenase flavoprotein subunit	2018.37	0.921876	0.32789	0	1	1	2018.37	-0.111576	0.328602	0	1	1	FALSE
ACFLL8_02530		579737	580441	+	235	succinate dehydrogenase iron-sulfur subunit	2160.47	2.13463	0.345137	3.28747	0.00101094	0.00692285	2160.47	-0.042494	0.346471	0	1	1	FALSE
ACFLL8_02535		580670	583504	+	945	2-oxoglutarate dehydrogenase E1 component	3686.71	0.857614	0.207789	0	1	1	3686.71	-0.0422336	0.208336	0	1	1	FALSE
ACFLL8_02540	odhB	583556	585106	+	517	2-oxoglutarate dehydrogenase complex dihydrolipoyllysine-residue succinyltransferase	1598.35	0.563715	0.181825	0	1	1	1598.35	-0.0700669	0.182964	0	1	1	FALSE
ACFLL8_02545	lpdA	585217	586656	+	480	dihydrolipoyl dehydrogenase	2711.56	0.300375	0.205985	0	1	1	2711.56	0.230208	0.206238	0	1	1	FALSE
ACFLL8_02550	sucC	586765	587931	+	389	ADP-forming succinate--CoA ligase subunit beta	2281.69	1.12366	0.19666	0.628811	0.529473	1	2281.69	0.150313	0.197616	0	1	1	FALSE
ACFLL8_02555	sucD	587931	588803	+	291	succinate--CoA ligase subunit alpha	1317.55	1.92766	0.338602	2.73969	0.00614971	0.0360066	1317.55	0.151514	0.340293	0	1	1	FALSE
ACFLL8_02560		589085	589618	+	178	DUF302 domain-containing protein	2061.76	-0.462092	0.19465	0	1	1	2061.76	0.00137737	0.194573	0	1	1	FALSE
ACFLL8_02565	glpQ	589804	590949	-	382	glycerophosphodiester phosphodiesterase	1238.47	-0.678513	0.248031	0	1	1	1238.47	-1.42628	0.249757	-1.70679	0.0878615	1	FALSE
ACFLL8_02570		591092	592096	-	335	lysylphosphatidylglycerol synthase transmembrane domain-containing protein	355.996	-1.48422	0.213254	-2.27064	0.0231686	0.115613	355.996	-0.198887	0.207776	0	1	1	FALSE
ACFLL8_02575		592160	592975	-	272	DUF2334 domain-containing protein	347.272	-2.14737	0.206492	-5.5565	2.75232e-08	4.097e-07	347.272	-0.246608	0.194403	0	1	1	FALSE
ACFLL8_02580		592968	594077	-	370	glycosyltransferase family 4 protein	795.456	-1.78946	0.325333	-2.42662	0.0152401	0.0814891	795.456	-0.240136	0.323084	0	1	1	FALSE
ACFLL8_02585		594722	595075	-	118	hypothetical protein	2513.08	-2.17019	0.412129	-2.83938	0.0045202	0.0275207	2513.08	-0.696581	0.411527	0	1	1	FALSE
ACFLL8_02590		595348	597294	-	649	exoribonuclease II	1983.25	0.724213	0.229703	0	1	1	1983.25	-0.229542	0.230696	0	1	1	FALSE
ACFLL8_02595		597467	598132	-	222	NAD%28P%29H-binding protein	454.071	-1.70744	0.302766	-2.33659	0.0194606	0.0999489	454.071	-0.678439	0.300401	0	1	1	FALSE
ACFLL8_02600		598539	599660	+	374	oxidoreductase	408.835	1.79161	0.204883	3.86373	0.00011167	0.00092089	408.835	0.598229	0.210528	0	1	1	FALSE
ACFLL8_02605		599761	600966	-	402	TIGR01620 family protein	614.236	0.109231	0.341398	0	1	1	614.236	0.465268	0.341429	0	1	1	FALSE
ACFLL8_02610		600963	602450	-	496	YcjX family protein	422.427	-0.540682	0.201726	0	1	1	422.427	0.313751	0.199727	0	1	1	FALSE
ACFLL8_02615		602572	603777	-	402	MFS transporter	469.058	-0.0352235	0.230618	0	1	1	469.058	-0.0828685	0.231948	0	1	1	FALSE
ACFLL8_02620		603922	604758	-	279	DUF2927 domain-containing protein	69.6394	-0.258935	0.291045	0	1	1	69.6394	-0.0497597	0.293904	0	1	1	FALSE
ACFLL8_02625		604916	606508	-	531	solute:sodium symporter family transporter	1135.71	2.05653	0.256743	4.11512	3.86978e-05	0.00035107	1135.71	0.217131	0.259411	0	1	1	FALSE
ACFLL8_02630		606943	608538	-	532	solute:sodium symporter family transporter	351.747	1.16116	0.197881	0.814456	0.415384	1	351.747	0.251885	0.203566	0	1	1	FALSE
ACFLL8_02635		608932	610641	-	570	alkaline phosphatase D family protein	248.907	-0.564846	0.216838	0	1	1	248.907	0.172107	0.214435	0	1	1	FALSE
ACFLL8_02640		610979	611605	+	209	DUF924 family protein	124.025	-0.751255	0.345481	0	1	1	124.025	0.440907	0.338363	0	1	1	FALSE
ACFLL8_02645		611705	611950	+	82	GlsB/YeaQ/YmgE family stress response membrane protein	1431.91	-2.45726	0.236134	-6.17133	6.7719e-10	1.21376e-08	1431.91	-0.369979	0.233	0	1	1	FALSE
ACFLL8_02650	katE	612210	614453	+	748	catalase HPII	7477.41	-2.30222	0.260426	-5.00032	5.72347e-07	7.03026e-06	7477.41	-0.579972	0.26002	0	1	1	FALSE
ACFLL8_02655		614904	616430	+	509	catalase	2080.26	-1.58823	0.278277	-2.11383	0.0345302	0.165265	2080.26	-1.71411	0.278776	-2.56159	0.0104195	0.690636	FALSE
ACFLL8_02660		616556	618745	-	730	S9 family peptidase	1042.51	0.338164	0.302788	0	1	1	1042.51	0.941329	0.302573	0	1	1	FALSE
ACFLL8_02665		618987	619505	+	173	hypothetical protein	560.089	0.823925	0.194789	0	1	1	560.089	0.230183	0.197533	0	1	1	FALSE
ACFLL8_02670		619550	621694	+	715	VWA domain-containing protein	1448.22	0.0784608	0.178096	0	1	1	1448.22	0.20433	0.178411	0	1	1	FALSE
ACFLL8_02675		621687	622574	+	296	class II glutamine amidotransferase	942.936	0.160066	0.173153	0	1	1	942.936	0.23683	0.17374	0	1	1	FALSE
ACFLL8_02680	cysK	622695	623660	-	322	cysteine synthase A	1252.18	1.76208	0.221391	3.44225	0.0005769	0.00414445	1252.18	0.402229	0.223382	0	1	1	FALSE
ACFLL8_02685		624131	625879	+	583	AMP-binding protein	1701.89	0.279677	0.161426	0	1	1	1701.89	0.00230877	0.162204	0	1	1	FALSE
ACFLL8_02690	hrpA	626101	630267	+	1389	ATP-dependent RNA helicase HrpA	3437.53	0.619253	0.198536	0	1	1	3437.53	-0.312653	0.199199	0	1	1	FALSE
ACFLL8_02695		630557	631801	+	415	beta-ketoacyl-ACP synthase III	5293.49	-0.795657	0.355086	0	1	1	5293.49	-0.654689	0.355137	0	1	1	FALSE
ACFLL8_02700		631944	632699	+	252	VacJ family lipoprotein	2968.9	-1.03102	0.260543	-0.119054	0.905233	1	2968.9	-0.396764	0.260406	0	1	1	FALSE
ACFLL8_02705		632807	633958	+	384	PP2C family protein-serine/threonine phosphatase	1541.47	-0.447344	0.249644	0	1	1	1541.47	-0.367378	0.24993	0	1	1	FALSE
ACFLL8_02710		633951	634505	+	185	STAS domain-containing protein	1834.69	-0.209988	0.216924	0	1	1	1834.69	-0.204055	0.217252	0	1	1	FALSE
ACFLL8_02715	tal	634622	635560	-	313	transaldolase	2086.53	0.821305	0.160714	0	1	1	2086.53	0.261935	0.161574	0	1	1	FALSE
ACFLL8_02720		635989	637206	+	406	Bcr/CflA family multidrug efflux MFS transporter	268.881	-0.616446	0.244316	0	1	1	268.881	-0.0804708	0.243422	0	1	1	FALSE
ACFLL8_02725		637331	638347	+	339	substrate-binding domain-containing protein	717.59	0.787391	0.44343	0	1	1	717.59	0.65765	0.443894	0	1	1	FALSE
ACFLL8_02730	pstC	638477	639733	+	419	phosphate ABC transporter permease subunit PstC	302.662	0.32609	0.317657	0	1	1	302.662	0.302415	0.318959	0	1	1	FALSE
ACFLL8_02735	pstA	639748	640914	+	389	phosphate ABC transporter permease PstA	308.98	-0.064322	0.310269	0	1	1	308.98	0.450601	0.3098	0	1	1	FALSE
ACFLL8_02740	pstB	641028	641831	+	268	phosphate ABC transporter ATP-binding protein PstB	472.519	-0.0168908	0.331418	0	1	1	472.519	0.104684	0.331957	0	1	1	FALSE
ACFLL8_02745		641971	643191	-	407	acetyl-CoA C-acyltransferase	2047.63	-0.695784	0.225362	0	1	1	2047.63	1.06726	0.224222	0.299969	0.764201	1	FALSE
ACFLL8_02750		643309	643911	+	201	TetR/AcrR family transcriptional regulator	498.186	-0.863715	0.2183	0	1	1	498.186	0.52019	0.214733	0	1	1	FALSE
ACFLL8_02755		644237	645895	+	553	AMP-binding protein	509.662	-0.46525	0.291729	0	1	1	509.662	-0.102773	0.291762	0	1	1	FALSE
ACFLL8_02760		645996	646760	+	255	SDR family NAD%28P%29-dependent oxidoreductase	430.539	1.35884	0.269727	1.3304	0.183387	0.672483	430.539	0.185649	0.273987	0	1	1	FALSE
ACFLL8_02765		647084	648895	+	604	acyl-CoA dehydrogenase C-terminal domain-containing protein	2225.13	0.337666	0.188248	0	1	1	2225.13	0.160454	0.188669	0	1	1	FALSE
ACFLL8_02770		649272	650504	+	411	AI-2E family transporter	966.485	-0.116889	0.199326	0	1	1	966.485	0.289173	0.199275	0	1	1	FALSE
ACFLL8_02775	trxA	650664	650987	-	108	thioredoxin	3231.81	4.39504	0.248602	13.6565	1.84621e-42	3.81514e-40	3231.81	0.449126	0.252289	0	1	1	FALSE
ACFLL8_02780		651239	652015	-	259	sulfite exporter TauE/SafE family protein	1069.56	2.69309	0.558902	3.02931	0.00245115	0.0159757	1069.56	0.239702	0.560828	0	1	1	FALSE
ACFLL8_02785	cysB	652192	653163	+	324	HTH-type transcriptional regulator CysB	1321.31	2.87381	0.280017	6.69177	2.2048e-11	4.66593e-10	1321.31	0.130892	0.283764	0	1	1	FALSE
ACFLL8_02790		653261	653887	-	209	phosphoadenosine phosphosulfate reductase family protein	632.491	3.28189	0.504313	4.52475	6.04683e-06	6.41768e-05	632.491	0.44315	0.508849	0	1	1	FALSE
ACFLL8_02795	pabB	654103	655554	-	484	aminodeoxychorismate synthase component I	1081.22	-0.346277	0.219918	0	1	1	1081.22	0.450483	0.219316	0	1	1	FALSE
ACFLL8_02800		655796	656668	+	291	alpha/beta fold hydrolase	102.747	-0.260042	0.264198	0	1	1	102.747	0.476032	0.25975	0	1	1	FALSE
ACFLL8_02805		657039	657818	+	260	GntR family transcriptional regulator	388.762	-0.235605	0.22067	0	1	1	388.762	0.309739	0.220009	0	1	1	FALSE
ACFLL8_02810	prpB	657892	658803	+	304	methylisocitrate lyase	463.254	-0.923457	0.247997	0	1	1	463.254	-0.0905713	0.246435	0	1	1	FALSE
ACFLL8_02815	prpC	658986	660143	+	386	2-methylcitrate synthase	621.724	-0.703763	0.218389	0	1	1	621.724	-0.0598432	0.217651	0	1	1	FALSE
ACFLL8_02820	acnD	660211	662913	+	901	Fe/S-dependent 2-methylisocitrate dehydratase AcnD	1531.85	-0.938881	0.2284	0	1	1	1531.85	-0.293881	0.228093	0	1	1	FALSE
ACFLL8_02825	prpF	662910	664178	+	423	2-methylaconitate cis-trans isomerase PrpF	462.809	-1.14696	0.200426	-0.733235	0.463415	1	462.809	-0.218944	0.197942	0	1	1	FALSE
ACFLL8_02830		664408	666006	+	533	bifunctional 2-methylcitrate dehydratase/aconitate hydratase	340.368	-0.611105	0.19535	0	1	1	340.368	-0.0218227	0.194177	0	1	1	FALSE
ACFLL8_02835		666196	666789	+	198	LemA family protein	1028.6	-0.188464	0.283457	0	1	1	1028.6	-0.738348	0.284684	0	1	1	FALSE
ACFLL8_02840		666861	668756	+	632	M48 family metallopeptidase	1583.11	-0.940504	0.219221	0	1	1	1583.11	-0.65922	0.219335	0	1	1	FALSE
ACFLL8_02860	rlmM	674371	675444	+	358	23S rRNA %28cytidine%282498%29-2%27-O%29-methyltransferase RlmM	506.591	1.14903	0.215405	0.691837	0.489039	1	506.591	-0.0405695	0.22014	0	1	1	FALSE
ACFLL8_02865		675584	675868	-	95	antibiotic biosynthesis monooxygenase family protein	2682.01	0.7392	0.29736	0	1	1	2682.01	0.324792	0.297663	0	1	1	FALSE
ACFLL8_02870	tusA	675928	676173	+	82	sulfurtransferase TusA	1256.85	-1.06258	0.253537	-0.246812	0.805054	1	1256.85	0.0901824	0.252555	0	1	1	FALSE
ACFLL8_02875		676185	676919	-	245	hypothetical protein	6017.3	-1.31186	0.253317	-1.23111	0.218283	0.775356	6017.3	0.0723733	0.253033	0	1	1	FALSE
ACFLL8_02880		677241	678644	-	468	MATE family efflux transporter	877.812	0.963819	0.229767	0	1	1	877.812	0.0575802	0.231809	0	1	1	FALSE
ACFLL8_02885		679106	679723	+	206	elongation factor P hydroxylase	169.794	1.40929	0.254724	1.6068	0.108098	0.431041	169.794	0.288357	0.26542	0	1	1	FALSE
ACFLL8_02890		679964	681010	+	349	Fe%283%2B%29 ABC transporter substrate-binding protein	1261.38	4.35305	0.401097	8.35968	6.28876e-17	2.23156e-15	1261.38	0.220969	0.407757	0	1	1	FALSE
ACFLL8_02895		681150	682952	+	601	ABC transporter permease	530.812	1.532	0.232162	2.29152	0.0219333	0.110389	530.812	0.539137	0.23549	0	1	1	FALSE
ACFLL8_02900		683108	683644	+	179	HPP family protein	235.671	1.44409	0.227916	1.94847	0.0513591	0.231348	235.671	-0.019658	0.239348	0	1	1	FALSE
ACFLL8_02905		683873	685549	+	559	DEAD/DEAH box helicase	2529	-0.644105	0.153937	0	1	1	2529	-0.440464	0.154108	0	1	1	FALSE
ACFLL8_02910		685642	686208	-	189	hypothetical protein	174.701	0.686794	0.276199	0	1	1	174.701	0.471734	0.279854	0	1	1	FALSE
ACFLL8_02915		686268	687227	-	320	TatD family hydrolase	393.567	-0.335355	0.272122	0	1	1	393.567	0.464436	0.270778	0	1	1	FALSE
ACFLL8_02920		687558	689495	+	646	ATP-binding cassette domain-containing protein	1576.51	0.363456	0.178011	0	1	1	1576.51	-0.116471	0.179025	0	1	1	FALSE
ACFLL8_02925		689584	690036	-	151	universal stress protein	5277.42	-0.197304	0.289944	0	1	1	5277.42	0.185559	0.289943	0	1	1	FALSE
ACFLL8_02930		690284	690832	+	183	preprotein translocase subunit YajC	136.477	1.09881	0.235007	0.420474	0.674139	1	136.477	-0.0780225	0.250696	0	1	1	FALSE
ACFLL8_02935	slyA	690976	691422	-	149	transcriptional regulator SlyA	940.028	2.09128	0.241921	4.5109	6.45526e-06	6.76935e-05	940.028	-0.295057	0.246988	0	1	1	FALSE
ACFLL8_02940		691601	692713	-	371	DUF5924 family protein	204.557	0.324141	0.225292	0	1	1	204.557	-0.151407	0.231412	0	1	1	FALSE
ACFLL8_02945	fadB	693124	695274	+	717	fatty acid oxidation complex subunit alpha FadB	3136.83	0.0329798	0.182005	0	1	1	3136.83	0.334183	0.182047	0	1	1	FALSE
ACFLL8_02950	fadA	695369	696547	+	393	acetyl-CoA C-acyltransferase FadA	2336.99	-0.827796	0.22878	0	1	1	2336.99	0.163245	0.228343	0	1	1	FALSE
ACFLL8_02955		696751	697683	+	311	amidohydrolase family protein	2011.24	-0.295093	0.187411	0	1	1	2011.24	0.0300093	0.187458	0	1	1	FALSE
ACFLL8_02960		697773	698123	-	117	DUF6482 family protein	150.025	-0.688392	0.290314	0	1	1	150.025	0.0720345	0.287048	0	1	1	FALSE
ACFLL8_02965	holA	698166	699224	-	353	DNA polymerase III subunit delta	302.727	-0.359815	0.255515	0	1	1	302.727	-0.393852	0.257464	0	1	1	FALSE
ACFLL8_02970	lptE	699370	699939	-	190	LPS assembly lipoprotein LptE	2191.57	0.444671	0.212738	0	1	1	2191.57	-0.310663	0.213575	0	1	1	FALSE
ACFLL8_02975	leuS	700122	702722	-	867	leucine--tRNA ligase	4514.25	0.445459	0.20376	0	1	1	4514.25	-0.143655	0.204111	0	1	1	FALSE
ACFLL8_02980		703052	703693	+	214	zinc ribbon-containing protein	2649.25	-2.07796	0.187435	-5.75111	8.86606e-09	1.37816e-07	2649.25	-0.119071	0.185702	0	1	1	FALSE
ACFLL8_02985		703693	704907	+	405	tetratricopeptide repeat protein	2996.05	-1.96225	0.186764	-5.15223	2.57409e-07	3.28828e-06	2996.05	-0.0742076	0.18535	0	1	1	FALSE
ACFLL8_02990		705003	705755	-	251	YdcF family protein	437.55	0.810375	0.214986	0	1	1	437.55	-0.128292	0.219606	0	1	1	FALSE
ACFLL8_02995	lnt	705821	707350	-	510	apolipoprotein N-acyltransferase	902.638	-0.0288926	0.177691	0	1	1	902.638	-0.133074	0.178713	0	1	1	FALSE
ACFLL8_03000		707438	708346	-	303	HlyC/CorC family transporter	768.581	-0.711344	0.187393	0	1	1	768.581	-0.0396544	0.186625	0	1	1	FALSE
ACFLL8_03005	ybeY	708475	709089	-	205	rRNA maturation RNase YbeY	1302.54	0.428642	0.209595	0	1	1	1302.54	0.237153	0.210247	0	1	1	FALSE
ACFLL8_03010		709212	710345	-	378	PhoH family protein	1192.02	0.375893	0.1812	0	1	1	1192.02	0.158697	0.182072	0	1	1	FALSE
ACFLL8_03015	miaB	710547	711896	-	450	tRNA %28N6-isopentenyl adenosine%2837%29-C2%29-methylthiotransferase MiaB	374.525	1.35104	0.295252	1.18894	0.234465	0.823674	374.525	0.244685	0.299471	0	1	1	FALSE
ACFLL8_03020		712708	713394	+	229	TIGR04211 family SH3 domain-containing protein	719.787	0.582236	0.188997	0	1	1	719.787	-0.268517	0.192063	0	1	1	FALSE
ACFLL8_03025	tmpT	713465	714148	+	228	thiopurine S-methyltransferase	428.262	0.742592	0.189541	0	1	1	428.262	0.176226	0.193148	0	1	1	FALSE
ACFLL8_03030		714288	714890	-	201	YajG family lipoprotein	572.038	0.250266	0.222547	0	1	1	572.038	0.61251	0.222581	0	1	1	FALSE
ACFLL8_03035		715048	716313	-	422	MFS transporter	542.563	-0.182088	0.218673	0	1	1	542.563	0.552315	0.217679	0	1	1	FALSE
ACFLL8_03040	ggt	716446	718116	-	557	gamma-glutamyltransferase	2180.7	-0.294225	0.283792	0	1	1	2180.7	0.0930736	0.283786	0	1	1	FALSE
ACFLL8_03045	rpe	718485	719192	+	236	ribulose-phosphate 3-epimerase	1138.25	-0.354357	0.191651	0	1	1	1138.25	-0.133276	0.191904	0	1	1	FALSE
ACFLL8_03050		719200	719541	+	114	GIY-YIG nuclease family protein	355.406	0.0635488	0.22365	0	1	1	355.406	0.138399	0.224889	0	1	1	FALSE
ACFLL8_03055		719622	720923	-	434	NAD%28P%29/FAD-dependent oxidoreductase	883.076	-0.910035	0.265877	0	1	1	883.076	0.088512	0.264848	0	1	1	FALSE
ACFLL8_03060		721390	722037	+	216	phosphoglycolate phosphatase	1705.96	-1.29895	0.326066	-0.916829	0.359232	1	1705.96	0.155567	0.325237	0	1	1	FALSE
ACFLL8_03065	trpE	722145	723632	+	496	anthranilate synthase component I	2871.28	-0.267263	0.25085	0	1	1	2871.28	0.0465938	0.25088	0	1	1	FALSE
ACFLL8_03070		723955	724590	+	212	anthranilate synthase component II	734.417	0.820372	0.180679	0	1	1	734.417	-0.623375	0.185809	0	1	1	FALSE
ACFLL8_03075	trpD	724666	725712	+	349	anthranilate phosphoribosyltransferase	760.574	0.195934	0.190709	0	1	1	760.574	-0.359778	0.19295	0	1	1	FALSE
ACFLL8_03080	trpC	725712	726539	+	276	indole-3-glycerol phosphate synthase TrpC	563.054	0.673626	0.238569	0	1	1	563.054	-0.13394	0.24149	0	1	1	FALSE
ACFLL8_03085		726715	727524	-	270	HAD-IIB family hydrolase	187.199	0.248424	0.247073	0	1	1	187.199	0.035717	0.251197	0	1	1	FALSE
ACFLL8_03090		727580	728365	-	262	DeoR/GlpR family DNA-binding transcription regulator	246.411	0.345223	0.205429	0	1	1	246.411	0.138359	0.20908	0	1	1	FALSE
ACFLL8_03095		728373	729164	-	264	glycerophosphoryl diester phosphodiesterase	323.164	-0.259097	0.215654	0	1	1	323.164	0.0127382	0.216172	0	1	1	FALSE
ACFLL8_03100		729345	730454	-	370	sn-glycerol-3-phosphate import ATP-binding protein UgpC	279.967	1.06264	0.236963	0.264341	0.791517	1	279.967	-0.142689	0.244934	0	1	1	FALSE
ACFLL8_03105	ugpE	730586	731431	-	282	sn-glycerol-3-phosphate ABC transporter permease UgpE	188.814	1.28766	0.263923	1.08994	0.275739	0.937727	188.814	0.38089	0.271691	0	1	1	FALSE
ACFLL8_03110	ugpA	731431	732306	-	292	sn-glycerol-3-phosphate ABC transporter permease UgpA	148.438	1.58984	0.312376	1.88824	0.0589938	0.256231	148.438	0.321685	0.323463	0	1	1	FALSE
ACFLL8_03115	ugpB	732498	733862	-	455	sn-glycerol-3-phosphate ABC transporter substrate-binding protein UgpB	602.314	1.54035	0.381511	1.41634	0.156677	0.586787	602.314	0.569333	0.383265	0	1	1	FALSE
ACFLL8_03120		734143	734724	+	194	hypothetical protein	576.674	2.34679	0.327315	4.11466	3.87749e-05	0.00035107	576.674	0.118616	0.332628	0	1	1	FALSE
ACFLL8_03125		734850	737318	-	823	acyl-CoA dehydrogenase	6203.06	-1.61312	0.276472	-2.21767	0.0265771	0.130217	6203.06	-0.145658	0.276174	0	1	1	FALSE
ACFLL8_03130		737357	737605	+	83	hypothetical protein	32.3316	-1.89712	0.543175	-1.65161	0.0986134	0.395467	32.3316	-2.23103	0.570593	-2.15745	0.0309703	1	FALSE
ACFLL8_03135	betA	737809	739524	-	572	choline dehydrogenase	972.992	-1.80448	0.236112	-3.4072	0.00065633	0.00464854	972.992	-0.379318	0.233823	0	1	1	FALSE
ACFLL8_03140	betB	739895	741376	-	494	betaine-aldehyde dehydrogenase	753.527	-1.58768	0.208737	-2.8154	0.00487171	0.0290566	753.527	-0.484709	0.206543	0	1	1	FALSE
ACFLL8_03145	betI	741464	742126	-	221	transcriptional regulator BetI	825.084	0.216919	0.205044	0	1	1	825.084	-0.282163	0.206824	0	1	1	FALSE
ACFLL8_03150		742621	743574	+	318	choline ABC transporter substrate-binding protein	2447.21	-1.22855	0.296897	-0.769809	0.441413	1	2447.21	-1.11829	0.297071	-0.3982	0.690483	1	FALSE
ACFLL8_03175		744662	746761	-	700	carboxy terminal-processing peptidase	3230	-0.490493	0.210419	0	1	1	3230	-0.19242	0.210461	0	1	1	FALSE
ACFLL8_03180		747056	748384	+	443	M18 family aminopeptidase	1283.06	-0.117911	0.187465	0	1	1	1283.06	0.296726	0.187412	0	1	1	FALSE
ACFLL8_03190		748784	750118	-	445	D-amino acid dehydrogenase	280.076	-0.248016	0.197622	0	1	1	280.076	-0.0097947	0.198484	0	1	1	FALSE
ACFLL8_03195		750272	751231	+	320	LysR family transcriptional regulator	392.505	0.607504	0.187067	0	1	1	392.505	-0.426261	0.193771	0	1	1	FALSE
ACFLL8_03200	ychF	751336	752427	-	364	redox-regulated ATPase YchF	409.814	1.60233	0.233009	2.58502	0.00973746	0.0546449	409.814	0.107043	0.239533	0	1	1	FALSE
ACFLL8_03205	pth	752726	753310	-	195	aminoacyl-tRNA hydrolase	817.074	1.68893	0.370068	1.86163	0.062655	0.269739	817.074	-0.368829	0.373243	0	1	1	FALSE
ACFLL8_03210		753342	753974	-	211	50S ribosomal protein L25/general stress protein Ctc	409.56	0.691497	0.277747	0	1	1	409.56	-0.507569	0.282747	0	1	1	FALSE
ACFLL8_03215		754154	755095	-	314	ribose-phosphate pyrophosphokinase	1003.05	0.862151	0.212677	0	1	1	1003.05	0.0978671	0.214374	0	1	1	FALSE
ACFLL8_03225	ispE	755272	756150	-	293	4-%28cytidine 5%27-diphospho%29-2-C-methyl-D-erythritol kinase	1384.55	0.343257	0.19325	0	1	1	1384.55	0.233295	0.193823	0	1	1	FALSE
ACFLL8_03230	lolB	756219	756893	-	225	lipoprotein insertase outer membrane protein LolB	710.693	-0.660681	0.202084	0	1	1	710.693	0.249489	0.200725	0	1	1	FALSE
ACFLL8_03235		757005	758888	-	628	tetratricopeptide repeat protein	1005.51	-0.327648	0.190138	0	1	1	1005.51	0.0314498	0.19017	0	1	1	FALSE
ACFLL8_03240	hemA	759418	760689	+	424	glutamyl-tRNA reductase	1600.21	1.16942	0.182361	0.929031	0.352873	1	1600.21	0.0105014	0.184091	0	1	1	FALSE
ACFLL8_03245	prfA	760686	761771	+	362	peptide chain release factor 1	567.876	0.757767	0.178966	0	1	1	567.876	-0.130531	0.183068	0	1	1	FALSE
ACFLL8_03250	prmC	761773	762621	+	283	peptide chain release factor N%285%29-glutamine methyltransferase	473.803	-0.586538	0.215888	0	1	1	473.803	-0.328672	0.216325	0	1	1	FALSE
ACFLL8_03255		762882	763382	+	167	Lrp/AsnC ligand binding domain-containing protein	1027.42	-0.411578	0.259184	0	1	1	1027.42	-1.14106	0.260969	-0.540527	0.588834	1	FALSE
ACFLL8_03260		763495	764247	+	251	ThiF family adenylyltransferase	1144.27	0.0207461	0.257904	0	1	1	1144.27	-1.1229	0.260073	-0.472561	0.636526	1	FALSE
ACFLL8_03265		764544	765929	+	462	NAD%28P%29/FAD-dependent oxidoreductase	921.724	-1.03614	0.249655	-0.144753	0.884906	1	921.724	0.709868	0.247236	0	1	1	FALSE
ACFLL8_03270		766029	767198	+	390	ABC transporter ATP-binding protein	953.77	-1.22412	0.2551	-0.878557	0.379641	1	953.77	0.833915	0.252089	0	1	1	FALSE
ACFLL8_03275		767201	768124	+	308	ABC transporter permease	470.089	-1.70999	0.255512	-2.77871	0.00545757	0.0322768	470.089	0.497906	0.247897	0	1	1	FALSE
ACFLL8_03280		768121	768921	+	267	ABC transporter permease	458.025	-0.620107	0.186162	0	1	1	458.025	0.164841	0.184418	0	1	1	FALSE
ACFLL8_03285		769028	770092	+	355	PotD/PotF family extracellular solute-binding protein	1817.47	-0.928023	0.207327	0	1	1	1817.47	0.413093	0.206331	0	1	1	FALSE
ACFLL8_03290		770166	771563	+	466	glutamine synthetase family protein	1101.8	-1.03112	0.27339	-0.113839	0.909365	1	1101.8	0.456722	0.271914	0	1	1	FALSE
ACFLL8_03295		771757	773049	+	431	NAD%28P%29/FAD-dependent oxidoreductase	738.737	-1.86618	0.210703	-4.11093	3.94067e-05	0.00035588	738.737	0.594009	0.20356	0	1	1	FALSE
ACFLL8_03300		773133	774509	-	459	glutamine synthetase family protein	908.39	-0.986638	0.206369	0	1	1	908.39	0.581317	0.203838	0	1	1	FALSE
ACFLL8_03305		774767	775552	+	262	gamma-glutamyl-gamma-aminobutyrate hydrolase family protein	441.445	-0.990719	0.253081	0	1	1	441.445	0.381821	0.249548	0	1	1	FALSE
ACFLL8_03310		775674	777170	+	499	aldehyde dehydrogenase	698.953	-1.21221	0.185304	-1.14522	0.252117	0.872597	698.953	0.10581	0.182248	0	1	1	FALSE
ACFLL8_03315		777294	777845	-	184	cupin domain-containing protein	563.416	0.839541	0.197637	0	1	1	563.416	0.544913	0.19941	0	1	1	FALSE
ACFLL8_03320	gatB	777972	779426	-	485	Asp-tRNA%28Asn%29/Glu-tRNA%28Gln%29 amidotransferase subunit GatB	1545.88	0.909139	0.181032	0	1	1	1545.88	0.539056	0.181818	0	1	1	FALSE
ACFLL8_03325	gatA	779426	780904	-	493	Asp-tRNA%28Asn%29/Glu-tRNA%28Gln%29 amidotransferase subunit GatA	669.391	0.639979	0.188932	0	1	1	669.391	0.357606	0.190516	0	1	1	FALSE
ACFLL8_03330	gatC	781037	781324	-	96	Asp-tRNA%28Asn%29/Glu-tRNA%28Gln%29 amidotransferase subunit GatC	208.382	0.262723	0.210802	0	1	1	208.382	0.4101	0.212422	0	1	1	FALSE
ACFLL8_03335		781567	782604	+	346	rod shape-determining protein	1930.73	0.680341	0.294322	0	1	1	1930.73	0.0218896	0.294909	0	1	1	FALSE
ACFLL8_03340	mreC	782669	783634	+	322	rod shape-determining protein MreC	824.462	0.37511	0.243712	0	1	1	824.462	-0.184939	0.245278	0	1	1	FALSE
ACFLL8_03345	mreD	783634	784116	+	161	rod shape-determining protein MreD	270.587	1.44398	0.216882	2.04712	0.0406463	0.188923	270.587	0.0465179	0.226808	0	1	1	FALSE
ACFLL8_03350		784204	784884	+	227	Maf family protein	133.108	0.777182	0.294527	0	1	1	133.108	-0.0517133	0.30444	0	1	1	FALSE
ACFLL8_03355	rng	785024	786487	+	488	ribonuclease G	1625.65	0.967716	0.223504	0	1	1	1625.65	-0.413996	0.225251	0	1	1	FALSE
ACFLL8_03360		786829	790944	+	1372	YhdP family protein	2166.35	0.0972985	0.213236	0	1	1	2166.35	-0.25487	0.213781	0	1	1	FALSE
ACFLL8_03365	tldD	790941	792401	+	487	metalloprotease TldD	1679.53	-0.102884	0.196383	0	1	1	1679.53	-0.377217	0.19709	0	1	1	FALSE
ACFLL8_03370	yjgA	792490	792993	-	168	ribosome biogenesis factor YjgA	1369.07	1.0741	0.175501	0.422211	0.672871	1	1369.07	-0.140274	0.177739	0	1	1	FALSE
ACFLL8_03375	pmbA	793070	794440	+	457	metalloprotease PmbA	1433.75	0.0561246	0.157512	0	1	1	1433.75	-0.139885	0.158372	0	1	1	FALSE
ACFLL8_03380	mgtE	794548	795903	-	452	magnesium transporter	1156.4	-0.694538	0.195512	0	1	1	1156.4	-0.333233	0.195538	0	1	1	FALSE
ACFLL8_03385		796068	796337	-	90	HPr family phosphocarrier protein	108.367	-0.367847	0.301903	0	1	1	108.367	-0.693599	0.310136	0	1	1	FALSE
ACFLL8_03390	rapZ	796324	797238	-	305	RNase adapter RapZ	603.394	-0.661261	0.252641	0	1	1	603.394	-0.886088	0.254281	0	1	1	FALSE
ACFLL8_03395		797335	797805	-	157	PTS sugar transporter subunit IIA	901.876	-1.74725	0.237312	-3.1488	0.00163942	0.0109284	901.876	-1.06167	0.236552	-0.26072	0.794309	1	FALSE
ACFLL8_03400	hpf	797815	798123	-	103	ribosome hibernation-promoting factor%2C HPF/YfiA family	4121.07	-0.990808	0.225302	0	1	1	4121.07	-0.752287	0.225365	0	1	1	FALSE
ACFLL8_03405		798723	800171	-	483	RNA polymerase factor sigma-54	2606.39	-0.0307357	0.169558	0	1	1	2606.39	-0.551242	0.170304	0	1	1	FALSE
ACFLL8_03410	lptB	800508	801248	-	247	LPS export ABC transporter ATP-binding protein	785.523	-1.39904	0.195168	-2.04458	0.0408963	0.189548	785.523	0.0614105	0.192039	0	1	1	FALSE
ACFLL8_03415	lptA	801251	801829	-	193	lipopolysaccharide transport periplasmic protein LptA	1245.99	0.705914	0.186113	0	1	1	1245.99	0.0528702	0.187532	0	1	1	FALSE
ACFLL8_03420	lptC	801928	802611	-	228	LPS export ABC transporter periplasmic protein LptC	908.627	-0.745422	0.196923	0	1	1	908.627	-0.275527	0.196722	0	1	1	FALSE
ACFLL8_03425		802611	803180	-	190	KdsC family phosphatase	2192.66	-0.722455	0.174304	0	1	1	2192.66	-0.194306	0.174153	0	1	1	FALSE
ACFLL8_03430		803307	804275	-	323	KpsF/GutQ family sugar-phosphate isomerase	1670.95	-0.171014	0.2073	0	1	1	1670.95	0.293526	0.207215	0	1	1	FALSE
ACFLL8_03435		804501	805445	-	315	calcium/sodium antiporter	457.316	0.697924	0.341408	0	1	1	457.316	0.384742	0.342747	0	1	1	FALSE
ACFLL8_03440		805729	806661	+	311	ABC transporter ATP-binding protein	1519.36	0.187097	0.169193	0	1	1	1519.36	-0.566399	0.170798	0	1	1	FALSE
ACFLL8_03445	mlaE	806658	807461	+	268	lipid asymmetry maintenance ABC transporter permease subunit MlaE	727.009	0.220662	0.217892	0	1	1	727.009	-0.407632	0.220126	0	1	1	FALSE
ACFLL8_03450	mlaD	807458	807922	+	155	outer membrane lipid asymmetry maintenance protein MlaD	519.476	-0.109374	0.209011	0	1	1	519.476	-0.549768	0.211778	0	1	1	FALSE
ACFLL8_03455		807975	808646	+	224	phospholipid-binding protein MlaC	1808.07	0.18719	0.178433	0	1	1	1808.07	-0.506027	0.17963	0	1	1	FALSE
ACFLL8_03460		808670	809041	+	124	lipid asymmetry maintenance protein MlaB	1443.63	-0.319724	0.212651	0	1	1	1443.63	-0.46777	0.213285	0	1	1	FALSE
ACFLL8_03465		809231	809485	+	85	BolA family protein	360.041	1.2715	0.19699	1.37824	0.168129	0.621725	360.041	-0.41657	0.207608	0	1	1	FALSE
ACFLL8_03470	murA	809498	810763	+	422	UDP-N-acetylglucosamine 1-carboxyvinyltransferase	1490.94	0.87947	0.177439	0	1	1	1490.94	-0.379571	0.17963	0	1	1	FALSE
ACFLL8_03475	hisG	810850	811494	+	215	ATP phosphoribosyltransferase	587.783	-0.0485608	0.182883	0	1	1	587.783	-0.271207	0.184825	0	1	1	FALSE
ACFLL8_03480	hisD	811628	812932	+	435	histidinol dehydrogenase	1306.78	-0.701652	0.235092	0	1	1	1306.78	-0.212122	0.234952	0	1	1	FALSE
ACFLL8_03485		813052	814383	-	444	S1C family serine protease	444.142	0.70745	0.210481	0	1	1	444.142	-0.393215	0.216	0	1	1	FALSE
ACFLL8_03490		814636	815412	+	259	Nif3-like dinuclear metal center hexameric protein	473.115	0.134945	0.221071	0	1	1	473.115	-0.374686	0.224038	0	1	1	FALSE
ACFLL8_03495		815535	815987	-	151	YhcB family protein	1601.45	1.40721	0.217102	1.87565	0.0607036	0.262302	1601.45	-0.242706	0.219208	0	1	1	FALSE
ACFLL8_03500	zapE	816421	817578	+	386	cell division protein ZapE	771.589	1.94009	0.18986	4.95149	7.36456e-07	8.7999e-06	771.589	0.0932222	0.195221	0	1	1	FALSE
ACFLL8_03505	rplM	817830	818258	+	143	50S ribosomal protein L13	3501.17	4.54596	0.400852	8.84606	9.06648e-19	3.93217e-17	3501.17	-0.200327	0.404511	0	1	1	FALSE
ACFLL8_03510	rpsI	818272	818661	+	130	30S ribosomal protein S9	1203.43	3.0487	0.341908	5.99195	2.07342e-09	3.53589e-08	1203.43	0.0605417	0.345864	0	1	1	FALSE
ACFLL8_03515	petA	818903	819499	+	199	ubiquinol-cytochrome c reductase iron-sulfur subunit	3024.81	-1.25636	0.241159	-1.06304	0.287764	0.968309	3024.81	0.278127	0.240487	0	1	1	FALSE
ACFLL8_03520		819499	820761	+	421	cytochrome bc complex cytochrome b subunit	2794.69	-0.777529	0.268447	0	1	1	2794.69	0.272131	0.268111	0	1	1	FALSE
ACFLL8_03525		820758	821567	+	270	cytochrome c1	3077.4	-0.0335979	0.267653	0	1	1	3077.4	0.523077	0.267582	0	1	1	FALSE
ACFLL8_03530	sspA	821783	822409	+	209	stringent starvation protein SspA	3294.37	0.813435	0.205065	0	1	1	3294.37	0.218565	0.205512	0	1	1	FALSE
ACFLL8_03535		822609	823211	+	201	ClpXP protease specificity-enhancing factor	3098.68	-0.350516	0.166703	0	1	1	3098.68	0.246689	0.166556	0	1	1	FALSE
ACFLL8_03540		823319	823897	-	193	BON domain-containing protein	1233	0.854628	0.186214	0	1	1	1233	0.256455	0.187522	0	1	1	FALSE
ACFLL8_03545		823936	824529	-	198	phosphoheptose isomerase	949.301	0.763847	0.180283	0	1	1	949.301	0.208115	0.181974	0	1	1	FALSE
ACFLL8_03550		824551	824943	-	131	YraN family protein	239.312	0.0231721	0.211003	0	1	1	239.312	0.112668	0.212869	0	1	1	FALSE
ACFLL8_03555		824945	826846	-	634	penicillin-binding protein activator	2287	-0.075632	0.202261	0	1	1	2287	-0.227027	0.202658	0	1	1	FALSE
ACFLL8_03560	rsmI	827048	827920	+	291	16S rRNA %28cytidine%281402%29-2%27-O%29-methyltransferase	819.176	0.640615	0.185652	0	1	1	819.176	0.0953052	0.187573	0	1	1	FALSE
ACFLL8_03570	rsmH	828695	829645	+	317	16S rRNA %28cytosine%281402%29-N%284%29%29-methyltransferase RsmH	1251.93	0.819909	0.253004	0	1	1	1251.93	-0.359193	0.254734	0	1	1	FALSE
ACFLL8_03575	ftsL	829973	830296	+	108	cell division protein FtsL	530.814	0.833526	0.186292	0	1	1	530.814	-0.131028	0.190772	0	1	1	FALSE
ACFLL8_03580		830437	832098	+	554	peptidoglycan D%2CD-transpeptidase FtsI family protein	1148.35	0.814189	0.169758	0	1	1	1148.35	0.0261017	0.171677	0	1	1	FALSE
ACFLL8_03585		832304	833818	+	505	UDP-N-acetylmuramoyl-L-alanyl-D-glutamate--2%2C 6-diaminopimelate ligase	1883.58	0.605168	0.189751	0	1	1	1883.58	0.175172	0.190459	0	1	1	FALSE
ACFLL8_03590	murF	833815	835254	+	480	UDP-N-acetylmuramoyl-tripeptide--D-alanyl-D- alanine ligase	1460.24	0.66167	0.165316	0	1	1	1460.24	0.195388	0.166406	0	1	1	FALSE
ACFLL8_03595	mraY	835264	836346	+	361	phospho-N-acetylmuramoyl-pentapeptide- transferase	909.475	0.79002	0.18572	0	1	1	909.475	-0.252142	0.188582	0	1	1	FALSE
ACFLL8_03600	murD	836360	837847	+	496	UDP-N-acetylmuramoyl-L-alanine--D-glutamate ligase	1223.98	0.920507	0.185329	0	1	1	1223.98	-0.155242	0.18748	0	1	1	FALSE
ACFLL8_03605	ftsW	837840	839057	+	406	putative lipid II flippase FtsW	1011.68	0.809728	0.201438	0	1	1	1011.68	-0.221018	0.20378	0	1	1	FALSE
ACFLL8_03610	murG	839153	840229	+	359	undecaprenyldiphospho-muramoylpentapeptide beta-N-acetylglucosaminyltransferase	1133.55	0.802955	0.166606	0	1	1	1133.55	0.06074	0.168496	0	1	1	FALSE
ACFLL8_03615	murC	840252	841664	+	471	UDP-N-acetylmuramate--L-alanine ligase	1843.88	0.553037	0.165613	0	1	1	1843.88	-0.188112	0.166841	0	1	1	FALSE
ACFLL8_03620		841661	842635	+	325	D-alanine--D-alanine ligase	796.312	-0.254153	0.190815	0	1	1	796.312	-0.201516	0.191567	0	1	1	FALSE
ACFLL8_03625		842639	843364	+	242	cell division protein FtsQ/DivIB	633.187	0.80877	0.224754	0	1	1	633.187	-0.245625	0.228178	0	1	1	FALSE
ACFLL8_03630	ftsA	843654	844794	+	380.333	cell division protein FtsA	9673.64	0.54057	0.251982	0	1	1	9673.64	0.101444	0.252089	0	1	1	FALSE
ACFLL8_03635	ftsZ	844975	846144	+	390	cell division protein FtsZ	26534.7	0.00715092	0.22056	0	1	1	26534.7	0.179302	0.220571	0	1	1	FALSE
ACFLL8_03640	lpxC	846603	847514	+	304	UDP-3-O-acyl-N-acetylglucosamine deacetylase	8979.82	-1.36405	0.245136	-1.48511	0.137516	0.525102	8979.82	-0.523436	0.245041	0	1	1	FALSE
ACFLL8_03645		847718	848200	-	161	DUF721 domain-containing protein	116.368	1.21251	0.292556	0.726392	0.467598	1	116.368	-0.379278	0.313106	0	1	1	FALSE
ACFLL8_03650		848263	848643	+	127	hypothetical protein	558.861	0.640938	0.214035	0	1	1	558.861	-0.116816	0.217158	0	1	1	FALSE
ACFLL8_03655	secA	848814	851576	+	921	preprotein translocase subunit SecA	3075.07	0.093706	0.178214	0	1	1	3075.07	-1.04498	0.179354	-0.250813	0.801959	1	FALSE
ACFLL8_03660	argJ	851693	852916	+	408	bifunctional glutamate N-acetyltransferase/amino-acid acetyltransferase ArgJ	1603.29	0.192146	0.180985	0	1	1	1603.29	-0.594775	0.182459	0	1	1	FALSE
ACFLL8_03665		853025	853978	+	318	Nudix family hydrolase	760.151	0.250545	0.190103	0	1	1	760.151	-0.296256	0.1923	0	1	1	FALSE
ACFLL8_03670	yacG	854107	854352	-	82	DNA gyrase inhibitor YacG	85.3148	-0.0064753	0.271084	0	1	1	85.3148	0.1189	0.274654	0	1	1	FALSE
ACFLL8_03675	coaE	854345	854992	-	216	dephospho-CoA kinase	587.079	-1.69237	0.278828	-2.48315	0.0130226	0.0705994	587.079	-0.558047	0.276556	0	1	1	FALSE
ACFLL8_03680		854992	855852	-	287	prepilin peptidase	1303.93	-1.24683	0.23484	-1.05106	0.29323	0.981063	1303.93	-0.491388	0.234301	0	1	1	FALSE
ACFLL8_03685		855952	857190	-	413	type II secretion system F family protein	6075.23	-0.0952596	0.28557	0	1	1	6075.23	-0.262989	0.28568	0	1	1	FALSE
ACFLL8_03690	pilB	857436	859172	-	579	type IV-A pilus assembly ATPase PilB	8371.16	-0.198709	0.272823	0	1	1	8371.16	0.110079	0.272833	0	1	1	FALSE
ACFLL8_03695		859936	860436	+	167	pilin	161683	0.347348	0.228003	0	1	1	161683	0.0348278	0.228009	0	1	1	FALSE
ACFLL8_03700		860484	860786	-	101	hypothetical protein	1591.79	3.07556	0.240665	8.62429	6.44922e-18	2.54563e-16	1591.79	0.227519	0.244501	0	1	1	FALSE
ACFLL8_03705		860911	862191	-	427	cation diffusion facilitator family transporter	577.141	-0.535968	0.182409	0	1	1	577.141	-0.10292	0.182213	0	1	1	FALSE
ACFLL8_03710		862270	863829	-	520	PhnE/PtxC family ABC transporter permease	382.086	0.0348039	0.202775	0	1	1	382.086	0.194491	0.203686	0	1	1	FALSE
ACFLL8_03715		863819	864544	-	242	ATP-binding cassette domain-containing protein	183.916	-0.737907	0.224439	0	1	1	183.916	-0.408379	0.224886	0	1	1	FALSE
ACFLL8_03720		864548	865429	-	294	putative selenate ABC transporter substrate-binding protein	1296.7	-0.156916	0.215532	0	1	1	1296.7	0.0886599	0.21569	0	1	1	FALSE
ACFLL8_03725		865549	866406	-	286	MurR/RpiR family transcriptional regulator	1457.76	-0.157565	0.180415	0	1	1	1457.76	0.120774	0.180541	0	1	1	FALSE
ACFLL8_03730	zwf	866779	868269	+	497	glucose-6-phosphate dehydrogenase	4770.51	-3.05484	0.212823	-9.65519	4.67282e-22	2.56494e-20	4770.51	-0.325854	0.211033	0	1	1	FALSE
ACFLL8_03735	pgl	868271	868972	+	234	6-phosphogluconolactonase	2568.12	-3.7062	0.239669	-11.2914	1.44679e-29	1.63954e-27	2568.12	-0.251752	0.234559	0	1	1	FALSE
ACFLL8_03740		869055	869717	+	221	bifunctional 4-hydroxy-2-oxoglutarate aldolase/2-dehydro-3-deoxy-phosphogluconate aldolase	7775.44	-2.63686	0.223919	-7.31006	2.67031e-13	6.79769e-12	7775.44	-0.262449	0.223164	0	1	1	FALSE
ACFLL8_03745		869940	871031	-	364	ketopantoate reductase family protein	292.828	-0.298165	0.210869	0	1	1	292.828	-0.409283	0.213747	0	1	1	FALSE
ACFLL8_03750		871077	873191	-	705	DNA topoisomerase III	582.862	-0.123194	0.184482	0	1	1	582.862	-0.312195	0.186339	0	1	1	FALSE
ACFLL8_03755		873262	875169	-	636	hypothetical protein	341.756	1.02671	0.232091	0.115105	0.908362	1	341.756	0.131423	0.237135	0	1	1	FALSE
ACFLL8_03760		875424	876383	+	320	homocysteine S-methyltransferase family protein	443.283	2.28248	0.208359	6.15513	7.5014e-10	1.33769e-08	443.283	0.555713	0.215812	0	1	1	FALSE
ACFLL8_03765		876491	878317	+	609	SEC-C metal-binding domain-containing protein	1518.65	1.25907	0.174379	1.48564	0.137374	0.525102	1518.65	0.270753	0.175985	0	1	1	FALSE
ACFLL8_03770		878509	879753	-	415	hypothetical protein	2170.27	-1.59752	0.347679	-1.71859	0.0856895	0.351695	2170.27	-1.14694	0.347628	-0.422702	0.672513	1	FALSE
ACFLL8_03775		879824	881281	-	486	WecB/TagA/CpsF family glycosyltransferase	2186.56	-2.40228	0.298445	-4.69862	2.61926e-06	2.93977e-05	2186.56	-0.937017	0.297406	0	1	1	FALSE
ACFLL8_03780		881278	882360	-	361	glycosyltransferase family 2 protein	1267.35	-2.07951	0.290884	-3.71115	0.00020632	0.00160353	1267.35	-0.901894	0.289659	0	1	1	FALSE
ACFLL8_03785		882357	883739	-	461	oligosaccharide flippase family protein	2644.88	-1.84738	0.298653	-2.83734	0.00454918	0.0276493	2644.88	-0.820675	0.298222	0	1	1	FALSE
ACFLL8_03790		883879	885252	-	458	O-antigen ligase family protein	626.801	-0.805504	0.227547	0	1	1	626.801	-0.608289	0.228056	0	1	1	FALSE
ACFLL8_03795		885260	886714	-	485	GumC family protein	708.046	-0.495505	0.279448	0	1	1	708.046	-0.289678	0.279766	0	1	1	FALSE
ACFLL8_03800		886773	887945	-	391	polysaccharide biosynthesis/export family protein	1317.17	-1.15536	0.249274	-0.623252	0.533119	1	1317.17	-0.552937	0.248978	0	1	1	FALSE
ACFLL8_03805		887945	888301	-	119	STAS domain-containing protein	1452.86	0.0144969	0.239998	0	1	1	1452.86	-0.122537	0.240499	0	1	1	FALSE
ACFLL8_03810		888578	889783	-	402	AmpG family muropeptide MFS transporter	799.84	0.203557	0.169965	0	1	1	799.84	-0.0855376	0.171591	0	1	1	FALSE
ACFLL8_03815	rfaH	890049	890576	+	176	transcription/translation regulatory transformer protein RfaH	230.793	1.27241	0.214565	1.26959	0.20423	0.735823	230.793	0.0418472	0.225019	0	1	1	FALSE
ACFLL8_03820		890644	891150	+	169	peptidylprolyl isomerase	207.988	1.0533	0.217171	0.245431	0.806123	1	207.988	0.00233462	0.227291	0	1	1	FALSE
ACFLL8_03825		891885	892256	-	124	ComEA family DNA-binding protein	6123.21	-3.1905	0.340595	-6.43138	1.26447e-10	2.46781e-09	6123.21	-1.93794	0.34021	-2.75695	0.00583433	0.401883	FALSE
ACFLL8_03830	pyrF	892550	893257	+	236	orotidine-5%27-phosphate decarboxylase	1456.8	-0.640797	0.180027	0	1	1	1456.8	-0.315964	0.180102	0	1	1	FALSE
ACFLL8_03835		893388	894215	-	276	SIMPL domain-containing protein	963.707	-0.126004	0.213378	0	1	1	963.707	-0.171672	0.21409	0	1	1	FALSE
ACFLL8_03840		894473	895333	+	287	ABC transporter substrate-binding protein	607.133	-0.618719	0.196677	0	1	1	607.133	-0.156527	0.19641	0	1	1	FALSE
ACFLL8_03845	cobO	895349	895948	-	200	cob%28I%29yrinic acid a%2Cc-diamide adenosyltransferase	482.169	-0.454715	0.214168	0	1	1	482.169	-0.505332	0.215732	0	1	1	FALSE
ACFLL8_03850		896032	897918	-	629	TonB-dependent receptor domain-containing protein	1356.5	0.669033	0.20095	0	1	1	1356.5	-0.212961	0.202509	0	1	1	FALSE
ACFLL8_03855		898450	899691	-	414	NupC/NupG family nucleoside CNT transporter	503.399	0.446061	0.219152	0	1	1	503.399	0.373434	0.220402	0	1	1	FALSE
ACFLL8_03860		899974	901941	-	656	cation:proton antiporter	821.754	-0.656536	0.225653	0	1	1	821.754	0.146149	0.22481	0	1	1	FALSE
ACFLL8_03865		902151	905372	-	1074	FAD-binding and %28Fe-S%29-binding domain-containing protein	3007.28	-0.190949	0.197011	0	1	1	3007.28	-0.173758	0.197223	0	1	1	FALSE
ACFLL8_03870		905723	906580	+	286	pyrroline-5-carboxylate reductase family protein	1676.71	-0.37383	0.200296	0	1	1	1676.71	0.327723	0.199963	0	1	1	FALSE
ACFLL8_03875	crcB	906787	907164	+	126	fluoride efflux transporter CrcB	439.415	-0.460748	0.200542	0	1	1	439.415	-0.0230121	0.200295	0	1	1	FALSE
ACFLL8_03880	serS	907300	908577	+	426	serine--tRNA ligase	1312.31	0.266405	0.175166	0	1	1	1312.31	-0.068678	0.17619	0	1	1	FALSE
ACFLL8_03885	cobA	909182	909979	+	266	uroporphyrinogen-III C-methyltransferase	2583.64	3.5051	0.415075	6.03529	1.58674e-09	2.74592e-08	2583.64	0.463839	0.416615	0	1	1	FALSE
ACFLL8_03890		910308	912137	+	610	acyl-CoA dehydrogenase C-terminal domain-containing protein	914.125	-0.026093	0.198882	0	1	1	914.125	-0.285407	0.200105	0	1	1	FALSE
ACFLL8_03895		912288	912833	-	182	DUF962 domain-containing protein	3223.82	-4.12318	0.260265	-12	3.55225e-33	4.62187e-31	3223.82	-0.0264342	0.254682	0	1	1	FALSE
ACFLL8_03900		913066	913518	-	151	nucleoside diphosphate kinase regulator	510.902	0.323431	0.237231	0	1	1	510.902	-0.232049	0.239838	0	1	1	FALSE
ACFLL8_03905		913735	914061	+	109	YnfA family protein	269.633	0.738071	0.216889	0	1	1	269.633	0.818495	0.218344	0	1	1	FALSE
ACFLL8_03910		914288	914659	+	124	hypothetical protein	966.013	-0.295301	0.217252	0	1	1	966.013	0.291536	0.216911	0	1	1	FALSE
ACFLL8_03920	bioD	915213	916004	-	264	dethiobiotin synthase	900.054	-1.23392	0.206536	-1.13256	0.257398	0.889124	900.054	0.175626	0.204191	0	1	1	FALSE
ACFLL8_03925		916043	916870	-	276	methyltransferase domain-containing protein	1057.54	-1.18719	0.205363	-0.911517	0.362023	1	1057.54	0.174634	0.203474	0	1	1	FALSE
ACFLL8_03930		916872	917693	-	274	alpha/beta fold hydrolase	567.656	-1.79139	0.262686	-3.01267	0.00258964	0.0166694	567.656	0.265058	0.257017	0	1	1	FALSE
ACFLL8_03935		917690	919027	-	446	aminotransferase class I/II-fold pyridoxal phosphate-dependent enzyme	252.997	-1.21601	0.412477	-0.52369	0.600494	1	252.997	0.123699	0.408605	0	1	1	FALSE
ACFLL8_03940	bioB	919046	920224	-	393	biotin synthase BioB	215.971	-0.795076	0.381946	0	1	1	215.971	-0.145125	0.380674	0	1	1	FALSE
ACFLL8_03945		920553	921170	+	206	ComF family protein	775.973	-4.43292	0.4015	-8.55025	1.22826e-17	4.63966e-16	775.973	-0.385576	0.384831	0	1	1	FALSE
ACFLL8_03950		921272	922369	+	366	serine/threonine protein kinase	1007.89	-0.703839	0.229435	0	1	1	1007.89	-0.121454	0.2291	0	1	1	FALSE
ACFLL8_03955	folE	922639	923190	+	184	GTP cyclohydrolase I FolE	1622.41	-0.629197	0.365712	0	1	1	1622.41	-0.169968	0.365659	0	1	1	FALSE
ACFLL8_03960	folX	923277	923702	+	142	dihydroneopterin triphosphate 2%27-epimerase	1565.92	-2.93124	0.323653	-5.967	2.41655e-09	4.06188e-08	1565.92	-0.785225	0.321073	0	1	1	FALSE
ACFLL8_03965		923738	924103	+	122	hypothetical protein	925.979	-3.47707	0.319359	-7.75639	8.73779e-15	2.60134e-13	925.979	-1.0707	0.313014	-0.225853	0.821315	1	FALSE
ACFLL8_03970		924195	925652	+	486	NAD-dependent succinate-semialdehyde dehydrogenase	5776.81	-2.20117	0.2004	-5.99384	2.04944e-09	3.51204e-08	5776.81	-0.650641	0.19982	0	1	1	FALSE
ACFLL8_03975	glsB	926201	927199	-	333	glutaminase B	406.069	-0.230475	0.207661	0	1	1	406.069	-0.97509	0.213032	0	1	1	FALSE
ACFLL8_03980		927411	927650	+	80	DUF2061 domain-containing protein	74.2468	-0.526202	0.270995	0	1	1	74.2468	-0.647046	0.280514	0	1	1	FALSE
ACFLL8_03985		927713	928804	+	364	amidohydrolase family protein	575.823	1.53874	0.239404	2.25033	0.0244279	0.120866	575.823	0.14574	0.24362	0	1	1	FALSE
ACFLL8_03990	purH	928915	930492	-	526	bifunctional phosphoribosylaminoimidazolecarboxamide formyltransferase/IMP cyclohydrolase	816.064	1.30029	0.360753	0.83239	0.405189	1	816.064	0.518267	0.361925	0	1	1	FALSE
ACFLL8_03995	fis	930555	930851	-	99	DNA-binding transcriptional regulator Fis	152.779	2.64471	0.283369	5.80414	6.46954e-09	1.02839e-07	152.779	0.72368	0.300955	0	1	1	FALSE
ACFLL8_04000	dusB	930848	931882	-	345	tRNA dihydrouridine synthase DusB	1488.85	2.5504	0.231361	6.70121	2.06706e-11	4.40097e-10	1488.85	0.373621	0.234122	0	1	1	FALSE
ACFLL8_04005	prmA	932051	932965	-	305	50S ribosomal protein L11 methyltransferase	234.373	-0.120063	0.205474	0	1	1	234.373	0.276632	0.205338	0	1	1	FALSE
ACFLL8_04010	accC	933150	934490	-	447	acetyl-CoA carboxylase biotin carboxylase subunit	1292.06	-0.0283959	0.214054	0	1	1	1292.06	0.400772	0.213992	0	1	1	FALSE
ACFLL8_04015	accB	934510	934980	-	157	acetyl-CoA carboxylase biotin carboxyl carrier protein	435.781	0.91141	0.219478	0	1	1	435.781	0.580167	0.221639	0	1	1	FALSE
ACFLL8_04020	aroQ	935147	935584	-	146	type II 3-dehydroquinate dehydratase	2046.31	1.37998	0.19473	1.95131	0.0510206	0.230974	2046.31	0.476656	0.195698	0	1	1	FALSE
ACFLL8_04025	dsbD	935869	937899	-	677	protein-disulfide reductase DsbD	416.213	0.431999	0.217333	0	1	1	416.213	0.271798	0.219176	0	1	1	FALSE
ACFLL8_04030		938255	939358	+	368	DUF2333 family protein	5754.14	0.568252	0.193249	0	1	1	5754.14	-0.326701	0.193645	0	1	1	FALSE
ACFLL8_04035	ppa	939527	940057	-	177	inorganic diphosphatase	1612.01	1.02708	0.207154	0.130745	0.895977	1	1612.01	-0.200371	0.2088	0	1	1	FALSE
ACFLL8_04040		940387	942114	+	576	protein kinase	1028.83	1.36646	0.208122	1.7608	0.0782722	0.326568	1028.83	0.541286	0.209788	0	1	1	FALSE
ACFLL8_04045		942264	943526	-	421	6-phosphofructokinase	857.347	-0.0439674	0.21921	0	1	1	857.347	0.250505	0.219353	0	1	1	FALSE
ACFLL8_04050	mpl	943719	945161	+	481	UDP-N-acetylmuramate:L-alanyl-gamma-D-glutamyl- meso-diaminopimelate ligase	1116.93	1.83929	0.207661	4.04164	5.30787e-05	0.00047087	1116.93	0.465832	0.210042	0	1	1	FALSE
ACFLL8_04055		945158	945811	+	218	flavin prenyltransferase UbiX	378.758	1.83318	0.203335	4.09758	4.17493e-05	0.00037607	378.758	0.737438	0.208937	0	1	1	FALSE
ACFLL8_04060		945854	946483	+	210	LysE family translocator	301.362	2.07255	0.232801	4.60715	4.08216e-06	4.43982e-05	301.362	0.278105	0.243299	0	1	1	FALSE
ACFLL8_04065		946641	947519	-	293	DMT family transporter	304.938	-0.331406	0.276282	0	1	1	304.938	-0.247779	0.27753	0	1	1	FALSE
ACFLL8_04070		947603	949057	-	485	bifunctional DedA family/phosphatase PAP2 family protein	250.287	-0.0352098	0.229587	0	1	1	250.287	-0.321237	0.233618	0	1	1	FALSE
ACFLL8_04075		949054	950016	-	321	diguanylate cyclase domain-containing protein	222.248	-0.371268	0.247585	0	1	1	222.248	-0.113804	0.248354	0	1	1	FALSE
ACFLL8_04080		950016	950957	-	314	hypothetical protein	1584.73	0.422179	0.201336	0	1	1	1584.73	0.362764	0.201758	0	1	1	FALSE
ACFLL8_04085		951249	952532	+	428	glutamate-5-semialdehyde dehydrogenase	2657.25	0.495943	0.155261	0	1	1	2657.25	0.00044023	0.155946	0	1	1	FALSE
ACFLL8_04090	nadD	952727	953362	+	212	nicotinate-nucleotide adenylyltransferase	624.518	-0.267838	0.225276	0	1	1	624.518	-0.0863618	0.22576	0	1	1	FALSE
ACFLL8_04095	rsfS	953455	953814	+	120	ribosome silencing factor	436.231	0.946351	0.195513	0	1	1	436.231	-0.105828	0.201031	0	1	1	FALSE
ACFLL8_04100	rlmH	953974	954441	+	156	23S rRNA %28pseudouridine%281915%29-N%283%29%29-methyltransferase RlmH	572.107	-0.0368705	0.194264	0	1	1	572.107	-0.0656332	0.195497	0	1	1	FALSE
ACFLL8_04105	mrdA	954484	956436	+	651	penicillin-binding protein 2	607.413	0.462018	0.181374	0	1	1	607.413	-0.229573	0.184636	0	1	1	FALSE
ACFLL8_04110	rodA	956423	957574	+	384	rod shape-determining protein RodA	492.498	0.202405	0.200021	0	1	1	492.498	-0.228855	0.202807	0	1	1	FALSE
ACFLL8_04115	mltB	957648	958688	+	347	lytic murein transglycosylase B	2332.12	-0.542567	0.184479	0	1	1	2332.12	-0.493304	0.18477	0	1	1	FALSE
ACFLL8_04120		958685	959713	+	343	septal ring lytic transglycosylase RlpA family protein	1395.3	0.226324	0.18909	0	1	1	1395.3	-0.172418	0.190082	0	1	1	FALSE
ACFLL8_04125		959812	961014	+	401	D-alanyl-D-alanine carboxypeptidase family protein	2473.03	1.6622	0.192644	3.43745	0.00058723	0.0042015	2473.03	-0.15229	0.194327	0	1	1	FALSE
ACFLL8_04130		961178	961465	+	96	YbeD family protein	353.894	0.640633	0.228517	0	1	1	353.894	-0.0030005	0.232571	0	1	1	FALSE
ACFLL8_04135	lipB	961523	962248	+	242	lipoyl%28octanoyl%29 transferase LipB	694.73	0.631524	0.226884	0	1	1	694.73	-0.0368737	0.229038	0	1	1	FALSE
ACFLL8_04140	lipA	962248	963240	+	331	lipoyl synthase	808.001	0.622667	0.181023	0	1	1	808.001	-0.0289433	0.1833	0	1	1	FALSE
ACFLL8_04145		963328	964317	-	330	LysR family transcriptional regulator	539.062	0.383078	0.229021	0	1	1	539.062	0.35257	0.230042	0	1	1	FALSE
ACFLL8_04150		964504	965919	+	472	acetyl-CoA carboxylase biotin carboxylase subunit	2714.83	-0.179082	0.417007	0	1	1	2714.83	1.49672	0.416612	1.19229	0.233148	1	FALSE
ACFLL8_04155	oadA	965989	967827	+	613	sodium-extruding oxaloacetate decarboxylase subunit alpha	2655.16	-1.78109	0.490425	-1.59268	0.111233	0.442537	2655.16	1.48611	0.489104	0.99387	0.320286	1	FALSE
ACFLL8_04160	gloA	967946	968497	+	184	lactoylglutathione lyase	813.986	0.651817	0.276255	0	1	1	813.986	0.619524	0.276792	0	1	1	FALSE
ACFLL8_04165		968798	969550	+	251	SDR family oxidoreductase	1262.52	-1.23844	0.206866	-1.15262	0.249067	0.865009	1262.52	-0.207893	0.205799	0	1	1	FALSE
ACFLL8_04170		969618	970307	+	230	prephenate dehydratase domain-containing protein	5231.3	-1.38787	0.288767	-1.34318	0.179213	0.659932	5231.3	-0.106851	0.288504	0	1	1	FALSE
ACFLL8_04175		970404	971243	+	280	isochorismatase family protein	2009.34	-2.11097	0.224234	-4.95452	7.25079e-07	8.69352e-06	2009.34	-0.369472	0.222567	0	1	1	FALSE
ACFLL8_04180		971466	971939	-	158	methylglyoxal synthase	966.952	-0.76724	0.197945	0	1	1	966.952	-0.464577	0.198097	0	1	1	FALSE
ACFLL8_04185	pyk	972019	973488	-	490	pyruvate kinase	1220.69	-2.88931	0.292145	-6.46703	9.99475e-11	1.96154e-09	1220.69	-1.08239	0.289166	-0.284939	0.775691	1	FALSE
ACFLL8_04190	topA	974096	976738	+	881	type I DNA topoisomerase	3562.29	0.514048	0.16405	0	1	1	3562.29	0.200848	0.16442	0	1	1	FALSE
ACFLL8_04195		976738	977217	+	160	DUF6586 family protein	668.109	0.530144	0.184468	0	1	1	668.109	0.178148	0.186321	0	1	1	FALSE
ACFLL8_04200		977469	977708	+	80	hypothetical protein	509.489	3.69615	0.254507	10.5936	3.19016e-26	2.60629e-24	509.489	0.241685	0.270792	0	1	1	FALSE
ACFLL8_04205	lexA	977839	978468	-	210	transcriptional repressor LexA	594.412	-1.25999	0.246561	-1.05448	0.291661	0.976744	594.412	-0.640773	0.245825	0	1	1	FALSE
ACFLL8_04210		979033	979710	+	226	TetR/AcrR family transcriptional regulator	523.842	-0.381985	0.215811	0	1	1	523.842	-0.204858	0.216445	0	1	1	FALSE
ACFLL8_04215		979710	980252	+	181	L%2CD-transpeptidase family protein	250.491	-1.23622	0.239338	-0.986973	0.323656	1	250.491	-0.510374	0.236796	0	1	1	FALSE
ACFLL8_04220	nagZ	980455	981549	+	365	beta-N-acetylhexosaminidase	732.741	0.578491	0.196228	0	1	1	732.741	-0.256567	0.199086	0	1	1	FALSE
ACFLL8_04225		981597	982988	+	464	mechanosensitive ion channel family protein	967.453	0.0154966	0.193479	0	1	1	967.453	-0.324878	0.194822	0	1	1	FALSE
ACFLL8_04230		982969	983550	+	194	hypoxanthine-guanine phosphoribosyltransferase	112.982	-0.21685	0.276039	0	1	1	112.982	-0.935577	0.289898	0	1	1	FALSE
ACFLL8_04235		983802	984539	+	246	S-methyl-5%27-thioinosine phosphorylase	287.61	0.739218	0.211821	0	1	1	287.61	0.493421	0.214849	0	1	1	FALSE
ACFLL8_04240	mfd	984656	988183	-	1176	transcription-repair coupling factor	2034.28	-0.657818	0.168257	0	1	1	2034.28	0.113712	0.167833	0	1	1	FALSE
ACFLL8_04245		988732	990180	+	483	glyceraldehyde-3-phosphate dehydrogenase	4584.83	0.373554	0.860032	0	1	1	4584.83	0.0819585	0.860086	0	1	1	FALSE
ACFLL8_04250		990522	991871	+	450	Na%28%2B%29-translocating NADH-quinone reductase subunit A	2505.14	1.00205	0.27235	0.00753818	0.993985	1	2505.14	-0.212873	0.273153	0	1	1	FALSE
ACFLL8_04255		991871	993103	+	411	NADH:ubiquinone reductase %28Na%28%2B%29-transporting%29 subunit B	1724.12	0.608044	0.278239	0	1	1	1724.12	-0.394788	0.279252	0	1	1	FALSE
ACFLL8_04260		993105	993887	+	261	Na%28%2B%29-translocating NADH-quinone reductase subunit C	1393.44	0.53884	0.313771	0	1	1	1393.44	-0.480058	0.314918	0	1	1	FALSE
ACFLL8_04265		993890	994558	+	223	NADH:ubiquinone reductase %28Na%28%2B%29-transporting%29 subunit D	898.788	-0.0952844	0.240072	0	1	1	898.788	-0.412115	0.241228	0	1	1	FALSE
ACFLL8_04270	nqrE	994560	995180	+	207	NADH:ubiquinone reductase %28Na%28%2B%29-transporting%29 subunit E	1115.86	0.124205	0.16584	0	1	1	1115.86	-0.0896799	0.166908	0	1	1	FALSE
ACFLL8_04275	nqrF	995206	996438	+	411	NADH:ubiquinone reductase %28Na%28%2B%29-transporting%29 subunit F	2341.32	0.784143	0.289604	0	1	1	2341.32	-0.296273	0.290349	0	1	1	FALSE
ACFLL8_04280		996442	997515	+	358	FAD:protein FMN transferase	1740.37	0.0571086	0.1986	0	1	1	1740.37	0.277924	0.198746	0	1	1	FALSE
ACFLL8_04285	nqrM	997699	997950	+	84	%28Na%2B%29-NQR maturation NqrM	2029.11	-0.104525	0.341878	0	1	1	2029.11	0.543258	0.34175	0	1	1	FALSE
ACFLL8_04290	sthA	998082	999473	+	464	Si-specific NAD%28P%29%28%2B%29 transhydrogenase	1212.74	-1.00028	0.232968	-0.0012131	0.999032	1	1212.74	0.230111	0.231771	0	1	1	FALSE
ACFLL8_04295		999625	999933	+	103	YrhK family protein	165.66	-1.59747	0.305751	-1.9541	0.0506895	0.230067	165.66	-0.30344	0.297148	0	1	1	FALSE
ACFLL8_04300		999983	1000852	-	290	DNA replication terminus site-binding protein	854.144	0.902626	0.193145	0	1	1	854.144	0.231946	0.195108	0	1	1	FALSE
ACFLL8_04305		1001055	1001975	-	307	carbon-nitrogen hydrolase	234.627	-0.283789	0.213259	0	1	1	234.627	0.530451	0.210313	0	1	1	FALSE
ACFLL8_04310		1001975	1003036	-	354	agmatine/peptidylarginine deiminase	212.689	0.366457	0.221433	0	1	1	212.689	0.42225	0.22352	0	1	1	FALSE
ACFLL8_04315		1003282	1004526	+	415	lipoprotein-releasing ABC transporter permease subunit	463.971	1.19625	0.205479	0.955064	0.339545	1	463.971	-0.0174715	0.21096	0	1	1	FALSE
ACFLL8_04320		1004579	1005301	+	241	ABC transporter ATP-binding protein	131.879	1.74094	0.258327	2.86821	0.00412795	0.0253522	131.879	0.645134	0.270975	0	1	1	FALSE
ACFLL8_04325		1005407	1005988	-	194	DUF2062 domain-containing protein	229.466	1.76027	0.338595	2.24537	0.0247446	0.12209	229.466	0.431175	0.345476	0	1	1	FALSE
ACFLL8_04330		1006157	1008994	+	946	ComEC/Rec2 family competence protein	867.607	-1.41445	0.268191	-1.54537	0.122257	0.47819	867.607	-0.408005	0.26697	0	1	1	FALSE
ACFLL8_04335		1009115	1009699	+	195	MotA/TolQ/ExbB proton channel family protein	1276.2	0.766729	0.171776	0	1	1	1276.2	0.0905854	0.1733	0	1	1	FALSE
ACFLL8_04340		1009894	1010319	+	142	ExbD/TolR family protein	714.573	0.0985209	0.173624	0	1	1	714.573	-0.109878	0.175208	0	1	1	FALSE
ACFLL8_04345	msbA	1010348	1012096	+	583	lipid A export permease/ATP-binding protein MsbA	1083.87	0.0192674	0.215305	0	1	1	1083.87	-0.331733	0.2164	0	1	1	FALSE
ACFLL8_04350	lpxK	1012093	1013082	+	330	tetraacyldisaccharide 4%27-kinase	1357.02	-0.376448	0.178182	0	1	1	1357.02	0.0409816	0.178123	0	1	1	FALSE
ACFLL8_04355		1013135	1013329	+	65	Trm112 family protein	200.147	-0.479302	0.30153	0	1	1	200.147	-0.312447	0.302812	0	1	1	FALSE
ACFLL8_04360	kdsB	1013329	1014135	+	269	3-deoxy-manno-octulosonate cytidylyltransferase	711.282	-1.00153	0.183474	-0.0083336	0.993351	1	711.282	-0.290484	0.182434	0	1	1	FALSE
ACFLL8_04365		1014128	1014670	+	181	low molecular weight protein-tyrosine-phosphatase	359.293	-0.814937	0.235342	0	1	1	359.293	-0.269703	0.234565	0	1	1	FALSE
ACFLL8_04370	murB	1014667	1015728	+	354	UDP-N-acetylmuramate dehydrogenase	393.806	-1.06905	0.207584	-0.332652	0.739397	1	393.806	-0.331797	0.20576	0	1	1	FALSE
ACFLL8_04375	rne	1018020	1019975	-	652	ribonuclease E	2284.62	0.390862	0.168926	0	1	1	2284.62	-0.666196	0.170315	0	1	1	FALSE
ACFLL8_04380	rluC	1021006	1021965	+	320	23S rRNA pseudouridine%28955/2504/2580%29 synthase RluC	569.926	1.08437	0.229034	0.368356	0.712608	1	569.926	-0.0843752	0.232972	0	1	1	FALSE
ACFLL8_04385		1021958	1022644	+	229	HAD-IA family hydrolase	309.662	-0.180701	0.223424	0	1	1	309.662	0.0138602	0.22432	0	1	1	FALSE
ACFLL8_04390	sppA	1022680	1023756	+	359	signal peptide peptidase SppA	889.465	-1.27953	0.251357	-1.11207	0.266109	0.913824	889.465	-0.451094	0.250472	0	1	1	FALSE
ACFLL8_04395		1023753	1024340	-	196	Maf family protein	746.98	-0.776436	0.230359	0	1	1	746.98	-0.387444	0.23033	0	1	1	FALSE
ACFLL8_04400		1024702	1025232	+	177	YceD family protein	2303.09	2.21003	0.280065	4.32052	1.55662e-05	0.00015535	2303.09	-0.0690559	0.28171	0	1	1	FALSE
ACFLL8_04405	rpmF	1025266	1025436	+	57	50S ribosomal protein L32	386.587	3.57845	0.237659	10.8494	2.00822e-27	1.76372e-25	386.587	-0.0902499	0.263839	0	1	1	FALSE
ACFLL8_04410	plsX	1025466	1026488	+	341	phosphate acyltransferase PlsX	146.487	1.20844	0.25501	0.817369	0.413718	1	146.487	-0.818265	0.280832	0	1	1	FALSE
ACFLL8_04415	fabD	1026862	1027824	+	321	ACP S-malonyltransferase	2116.21	1.72388	0.195902	3.69512	0.00021978	0.00170066	2116.21	0.934854	0.196697	0	1	1	FALSE
ACFLL8_04420	fabG	1027885	1028628	+	248	3-oxoacyl-ACP reductase FabG	2727.68	1.369	0.191028	1.93168	0.0533995	0.238971	2727.68	0.748877	0.191576	0	1	1	FALSE
ACFLL8_04425	acpP	1028729	1028962	+	78	acyl carrier protein	13022.7	5.44635	0.212109	20.9626	1.43944e-97	2.52837e-94	13022.7	1.19617	0.213408	0.919216	0.357983	1	FALSE
ACFLL8_04430	fabF	1029493	1030737	+	415	beta-ketoacyl-ACP synthase II	6133.1	2.29274	0.233488	5.53664	3.0833e-08	4.53207e-07	6133.1	0.14768	0.234155	0	1	1	FALSE
ACFLL8_04435	pabC	1030885	1031736	+	284	aminodeoxychorismate lyase	464.22	1.42654	0.222332	1.9185	0.0550477	0.244479	464.22	0.10772	0.227689	0	1	1	FALSE
ACFLL8_04440	mltG	1031809	1032810	+	334	endolytic transglycosylase MltG	277.724	0.865344	0.214706	0	1	1	277.724	0.247435	0.219805	0	1	1	FALSE
ACFLL8_04445	tmk	1032912	1033643	+	244	dTMP kinase	235.945	0.584399	0.205537	0	1	1	235.945	0.0321099	0.211615	0	1	1	FALSE
ACFLL8_04450		1033640	1034668	+	343	DNA polymerase III subunit delta%27	516.029	0.487505	0.237672	0	1	1	516.029	-0.132273	0.240363	0	1	1	FALSE
ACFLL8_04455		1034842	1035192	+	117	PilZ domain-containing protein	831.402	0.306323	0.334689	0	1	1	831.402	-0.289449	0.335892	0	1	1	FALSE
ACFLL8_04460		1035299	1036135	+	279	TatD family hydrolase	1058.03	-0.64175	0.206808	0	1	1	1058.03	-0.285937	0.206844	0	1	1	FALSE
ACFLL8_04465		1036179	1036814	+	212	DUF1285 domain-containing protein	1155.1	-1.29722	0.232986	-1.27571	0.202059	0.731785	1155.1	-0.249702	0.231906	0	1	1	FALSE
ACFLL8_04470		1036910	1039480	+	857	ATP-dependent helicase	1967.11	-1.46886	0.237415	-1.97485	0.0482846	0.220577	1967.11	-0.269652	0.236617	0	1	1	FALSE
ACFLL8_04475		1039579	1040520	+	314	sulfurtransferase	2700.06	-0.0576775	0.261532	0	1	1	2700.06	0.294782	0.261543	0	1	1	FALSE
ACFLL8_04480		1040622	1041857	-	412	dicarboxylate/amino acid:cation symporter	167.396	3.41419	0.291654	8.27757	1.25714e-16	4.37262e-15	167.396	0.44175	0.322397	0	1	1	FALSE
ACFLL8_04485		1042161	1043804	-	548	electron transfer flavoprotein-ubiquinone oxidoreductase	1144.73	1.49688	0.237793	2.08955	0.0366579	0.173791	1144.73	0.405253	0.239457	0	1	1	FALSE
ACFLL8_04490		1044425	1045177	+	251	electron transfer flavoprotein subunit beta/FixA family protein	8242.24	1.65188	0.212091	3.07359	0.00211499	0.0139138	8242.24	0.461107	0.212369	0	1	1	FALSE
ACFLL8_04495		1045174	1046100	+	309	electron transfer flavoprotein subunit alpha/FixB family protein	7583.05	1.03272	0.18685	0.175099	0.861002	1	7583.05	0.498919	0.187041	0	1	1	FALSE
ACFLL8_04500		1046466	1047332	+	289	DUF3450 domain-containing protein	164.831	1.05727	0.362269	0.158083	0.874392	1	164.831	0.0611481	0.369642	0	1	1	FALSE
ACFLL8_04505		1047332	1048798	+	489	MotA/TolQ/ExbB proton channel family protein	558.541	1.81858	0.380167	2.15323	0.0313009	0.150837	558.541	0.251671	0.383222	0	1	1	FALSE
ACFLL8_04510		1048791	1049426	+	212	MotA/TolQ/ExbB proton channel family protein	107.452	2.63924	0.44754	3.66277	0.0002495	0.00191377	107.452	0.467624	0.466809	0	1	1	FALSE
ACFLL8_04515		1049419	1049817	+	133	ExbD/TolR family protein	130.818	3.69971	0.475563	5.67687	1.3718e-08	2.05946e-07	130.818	0.422294	0.505608	0	1	1	FALSE
ACFLL8_04520		1049819	1050604	+	262	energy transducer TonB	80.9846	2.3627	0.386007	3.53025	0.00041517	0.00307053	80.9846	-0.12393	0.423094	0	1	1	FALSE
ACFLL8_04525		1050759	1052087	+	443	hypothetical protein	845.022	1.07475	0.211097	0.354118	0.72325	1	845.022	1.13492	0.211585	0.637652	0.5237	1	FALSE
ACFLL8_04530	xthA	1052224	1053036	-	271	exodeoxyribonuclease III	536.37	1.349	0.183975	1.89698	0.0578309	0.253317	536.37	0.121534	0.189204	0	1	1	FALSE
ACFLL8_04535		1053036	1053302	-	89	hypothetical protein	238.82	1.93744	0.249284	3.76052	0.00016956	0.00135074	238.82	-0.29142	0.266444	0	1	1	FALSE
ACFLL8_04540		1054247	1055551	+	435	DEAD/DEAH box helicase	1585.8	0.443405	0.176004	0	1	1	1585.8	-0.559494	0.177803	0	1	1	FALSE
ACFLL8_04545	dinG	1055735	1057873	+	713	ATP-dependent DNA helicase DinG	881.67	0.868652	0.183574	0	1	1	881.67	-0.362493	0.187063	0	1	1	FALSE
ACFLL8_04550		1057991	1059079	-	363	3-deoxy-7-phosphoheptulonate synthase	2861.06	2.2945	0.207815	6.22909	4.69142e-10	8.53937e-09	2861.06	-0.292155	0.210014	0	1	1	FALSE
ACFLL8_04555	rpoE	1059609	1060211	+	201	RNA polymerase sigma factor RpoE	814.65	1.54164	0.259199	2.08966	0.0366481	0.173791	814.65	0.269042	0.261695	0	1	1	FALSE
ACFLL8_04560		1060533	1061249	+	239	sigma-E factor negative regulatory protein	21783.8	-2.99153	0.255188	-7.80419	5.98832e-15	1.79803e-13	21783.8	0.372186	0.25476	0	1	1	FALSE
ACFLL8_04565		1061455	1061703	-	83	VF530 family DNA-binding protein	246.217	-0.225285	0.244133	0	1	1	246.217	-0.258194	0.246545	0	1	1	FALSE
ACFLL8_04570		1061850	1062320	+	157	SoxR reducing system RseC family protein	1243.34	-0.843658	0.201106	0	1	1	1243.34	0.00802254	0.200376	0	1	1	FALSE
ACFLL8_04575		1062579	1063985	+	469	DegQ family serine endoprotease	17985.9	-1.84898	0.200276	-4.23906	2.24457e-05	0.00021603	17985.9	0.619536	0.199971	0	1	1	FALSE
ACFLL8_04580	lepA	1064262	1066082	+	607	translation elongation factor 4	3497.96	-0.0535086	0.157204	0	1	1	3497.96	-0.0412485	0.157428	0	1	1	FALSE
ACFLL8_04585	lepB	1066137	1066940	+	268	signal peptidase I	1868.71	-0.270403	0.208769	0	1	1	1868.71	-0.150395	0.209	0	1	1	FALSE
ACFLL8_04590	rnc	1067284	1067976	+	231	ribonuclease III	791.222	0.537588	0.197144	0	1	1	791.222	0.68624	0.197577	0	1	1	FALSE
ACFLL8_04595	era	1068069	1069013	+	315	GTPase Era	816.646	-0.286428	0.226224	0	1	1	816.646	0.275705	0.225883	0	1	1	FALSE
ACFLL8_04600	recO	1069161	1069877	+	239	DNA repair protein RecO	471.881	-0.713556	0.220964	0	1	1	471.881	0.774442	0.216973	0	1	1	FALSE
ACFLL8_04605	pdxJ	1069981	1070805	+	275	pyridoxine 5%27-phosphate synthase	567.79	-0.641094	0.176297	0	1	1	567.79	0.149705	0.174783	0	1	1	FALSE
ACFLL8_04610	acpS	1070802	1071179	+	126	holo-ACP synthase	172.364	-1.11836	0.245948	-0.48126	0.630332	1	172.364	0.20288	0.236727	0	1	1	FALSE
ACFLL8_04615		1071359	1074340	-	994	response regulator	1137.66	0.15829	0.197236	0	1	1	1137.66	0.194587	0.197724	0	1	1	FALSE
ACFLL8_04620	cysM	1074681	1075610	+	310	cysteine synthase CysM	470.774	0.480266	0.207659	0	1	1	470.774	0.157218	0.209913	0	1	1	FALSE
ACFLL8_04625	rlmD	1075610	1077007	+	466	23S rRNA %28uracil%281939%29-C%285%29%29-methyltransferase RlmD	1636.11	0.562903	0.172288	0	1	1	1636.11	0.160059	0.173159	0	1	1	FALSE
ACFLL8_04630	relA	1077070	1079334	+	755	GTP diphosphokinase	4259.7	-0.137871	0.211662	0	1	1	4259.7	0.119681	0.211706	0	1	1	FALSE
ACFLL8_04635	mazG	1079331	1080254	+	308	nucleoside triphosphate pyrophosphohydrolase	2742.75	-0.166144	0.175994	0	1	1	2742.75	0.0711404	0.176091	0	1	1	FALSE
ACFLL8_04640	ppc	1080562	1083210	+	883	phosphoenolpyruvate carboxylase	4605.37	-0.573053	0.196154	0	1	1	4605.37	0.172239	0.196008	0	1	1	FALSE
ACFLL8_04645		1083323	1084369	-	349	asparaginase	201.388	1.41222	0.220274	1.87141	0.0612889	0.264181	201.388	0.142366	0.232071	0	1	1	FALSE
ACFLL8_04650	pcp	1084486	1085145	-	220	pyroglutamyl-peptidase I	231.52	0.933986	0.217219	0	1	1	231.52	0.276258	0.223468	0	1	1	FALSE
ACFLL8_04655		1085224	1086135	-	304	DUF979 domain-containing protein	163.651	0.0788932	0.228815	0	1	1	163.651	0.253056	0.230554	0	1	1	FALSE
ACFLL8_04660		1086132	1086905	-	258	DUF969 domain-containing protein	131.158	0.976092	0.284128	0	1	1	131.158	0.387637	0.291847	0	1	1	FALSE
ACFLL8_04665		1087320	1088519	-	400	MFS transporter	342.387	-0.143822	0.239418	0	1	1	342.387	-0.0733684	0.240697	0	1	1	FALSE
ACFLL8_04670		1088783	1089403	-	207	hypothetical protein	1397.33	-1.01836	0.17439	-0.105295	0.916141	1	1397.33	0.00153028	0.173334	0	1	1	FALSE
ACFLL8_04675		1089623	1090237	-	205	CBS domain-containing protein	1206.54	-2.98068	0.273985	-7.22916	4.86003e-13	1.19394e-11	1206.54	0.813026	0.265035	0	1	1	FALSE
ACFLL8_04680		1090741	1091241	-	167	hypothetical protein	558.242	0.406069	0.211691	0	1	1	558.242	0.20292	0.213234	0	1	1	FALSE
ACFLL8_04685		1091928	1093232	+	435	GGDEF domain-containing protein	1424.47	-0.19451	0.200061	0	1	1	1424.47	-0.13185	0.200444	0	1	1	FALSE
ACFLL8_04690		1093330	1093938	+	203	hypothetical protein	1150.85	-0.256493	0.243546	0	1	1	1150.85	-0.0797645	0.243795	0	1	1	FALSE
ACFLL8_04695		1094248	1094787	+	180	glycine zipper 2TM domain-containing protein	2092.68	-0.637109	0.325874	0	1	1	2092.68	-0.651793	0.326103	0	1	1	FALSE
ACFLL8_04700		1094979	1095674	-	232	membrane integrity-associated transporter subunit PqiC	1278.95	-1.2591	0.199547	-1.29842	0.194142	0.705295	1278.95	-0.732889	0.199283	0	1	1	FALSE
ACFLL8_04705	pqiB	1095686	1097320	-	545	intermembrane transport protein PqiB	2076.55	-0.646282	0.166388	0	1	1	2076.55	-0.755883	0.166959	0	1	1	FALSE
ACFLL8_04710		1097317	1098744	-	476	PqiA/YebS family transporter subunit	1147.62	-0.370664	0.184099	0	1	1	1147.62	-0.51567	0.185027	0	1	1	FALSE
ACFLL8_04715		1099054	1102185	-	1044	efflux RND transporter permease subunit	2484.97	-0.406478	0.23661	0	1	1	2484.97	0.141311	0.236508	0	1	1	FALSE
ACFLL8_04720		1102289	1103584	-	432	efflux RND transporter periplasmic adaptor subunit	1479.23	-0.0991622	0.250592	0	1	1	1479.23	0.605789	0.250305	0	1	1	FALSE
ACFLL8_04725		1104015	1105199	-	395	ArsA family ATPase	671.096	-0.661955	0.205963	0	1	1	671.096	0.159829	0.20478	0	1	1	FALSE
ACFLL8_04730		1105190	1105510	-	107	cory-CC-star protein	45.6111	0.490333	0.452675	0	1	1	45.6111	-0.0669879	0.467247	0	1	1	FALSE
ACFLL8_04735		1105500	1107248	-	583	carbon starvation protein A	488.871	0.0212011	0.26985	0	1	1	488.871	0.1592	0.270442	0	1	1	FALSE
ACFLL8_04740	coxB	1107646	1108806	+	387	cytochrome c oxidase subunit II	8677.83	-1.93674	0.40652	-2.3043	0.0212061	0.107499	8677.83	-0.14552	0.406313	0	1	1	FALSE
ACFLL8_04745	ctaD	1108837	1110501	+	555	cytochrome c oxidase subunit I	4319.26	-2.32033	0.402119	-3.28344	0.00102548	0.00699513	4319.26	-0.0924203	0.401491	0	1	1	FALSE
ACFLL8_04750		1110529	1111122	+	198	cytochrome c oxidase assembly protein	932.017	-2.78734	0.39835	-4.48685	7.22844e-06	7.51287e-05	932.017	-0.0252929	0.393809	0	1	1	FALSE
ACFLL8_04755		1111119	1111979	+	287	cytochrome c oxidase subunit 3	2421.88	-2.55531	0.360444	-4.31499	1.59611e-05	0.00015884	2421.88	0.0727839	0.358771	0	1	1	FALSE
ACFLL8_04760		1112007	1112198	-	64	DUF2909 domain-containing protein	1593.83	-3.15254	0.310808	-6.92564	4.34006e-12	9.83654e-11	1593.83	0.09345	0.306004	0	1	1	FALSE
ACFLL8_04765		1112197	1113024	+	276	SURF1 family protein	2737.32	-2.52913	0.370401	-4.1283	3.6545e-05	0.0003352	2737.32	-0.106849	0.369118	0	1	1	FALSE
ACFLL8_04770		1113060	1113656	+	199	hypothetical protein	2818.27	-3.64471	0.349433	-7.56859	3.77287e-14	1.01955e-12	2818.27	-0.197279	0.346336	0	1	1	FALSE
ACFLL8_04775		1113958	1115160	+	401	heme A synthase	1305.66	-3.48356	0.372648	-6.66462	2.65346e-11	5.54858e-10	1305.66	-0.0398896	0.366709	0	1	1	FALSE
ACFLL8_04780		1115268	1115663	-	132	glutaredoxin family protein	137.343	0.118558	0.276375	0	1	1	137.343	-0.296667	0.283524	0	1	1	FALSE
ACFLL8_04785		1115835	1116854	-	340	LysR family transcriptional regulator	264.966	-0.703161	0.236803	0	1	1	264.966	-0.171517	0.235869	0	1	1	FALSE
ACFLL8_04790		1116987	1118219	+	411	multidrug effflux MFS transporter	189.777	0.331407	0.222265	0	1	1	189.777	0.231875	0.225802	0	1	1	FALSE
ACFLL8_04795	yegS	1118309	1119220	+	304	lipid kinase YegS	767.578	1.38634	0.231785	1.66681	0.0955525	0.386279	767.578	0.384846	0.234159	0	1	1	FALSE
ACFLL8_04800		1119363	1119800	+	146	NfeD family protein	258.165	0.498537	0.309041	0	1	1	258.165	0.654138	0.309865	0	1	1	FALSE
ACFLL8_04805		1119904	1120929	+	342	SPFH domain-containing protein	1598.13	-0.0029326	0.221933	0	1	1	1598.13	0.528996	0.221792	0	1	1	FALSE
ACFLL8_04810		1121048	1121506	+	153	nucleoside deaminase	1622.43	1.13318	0.17615	0.756043	0.449623	1	1622.43	0.824313	0.176828	0	1	1	FALSE
ACFLL8_04815		1121719	1122267	+	183	hypothetical protein	7463.64	-0.819891	0.198982	0	1	1	7463.64	0.0552692	0.198854	0	1	1	FALSE
ACFLL8_04825		1122948	1123787	+	280	isopenicillin N synthase family dioxygenase	1340.92	1.57147	0.23127	2.471	0.0134735	0.0724845	1340.92	0.504163	0.232686	0	1	1	FALSE
ACFLL8_04830		1123957	1124361	+	135	NINE protein	586.316	0.754438	0.243094	0	1	1	586.316	0.479746	0.244457	0	1	1	FALSE
ACFLL8_04835		1124471	1124896	+	142	hypothetical protein	620.384	0.126427	0.32131	0	1	1	620.384	0.353448	0.321548	0	1	1	FALSE
ACFLL8_04840		1124926	1125609	+	228	ZIP family metal transporter	353.083	-0.24197	0.308114	0	1	1	353.083	-0.0204754	0.308606	0	1	1	FALSE
ACFLL8_04845		1125707	1126291	+	195	exopolysaccharide biosynthesis protein	132.661	-0.202375	0.338435	0	1	1	132.661	-0.320469	0.342359	0	1	1	FALSE
ACFLL8_04850		1126525	1127169	+	215	LysE family translocator	695.963	0.984288	0.191235	0	1	1	695.963	-0.475237	0.196261	0	1	1	FALSE
ACFLL8_04855		1127266	1127802	+	179	hypothetical protein	796.332	-0.837672	0.202658	0	1	1	796.332	0.211091	0.20107	0	1	1	FALSE
ACFLL8_04860		1127957	1128904	+	316	hypothetical protein	675.639	0.0344306	0.216583	0	1	1	675.639	-0.741149	0.219579	0	1	1	FALSE
ACFLL8_04865		1129015	1131009	-	665	transglycosylase SLT domain-containing protein	1320.42	0.0549343	0.171915	0	1	1	1320.42	0.203048	0.172242	0	1	1	FALSE
ACFLL8_04870		1131231	1131569	+	113	YkvA family protein	579.513	-0.57994	0.244222	0	1	1	579.513	-0.0358458	0.243789	0	1	1	FALSE
ACFLL8_04875		1131750	1132136	+	129	MAPEG family protein	677.184	-0.108773	0.250316	0	1	1	677.184	0.00963864	0.250832	0	1	1	FALSE
ACFLL8_04880		1132139	1133320	+	394	PaaI family thioesterase	1090.12	-0.641624	0.24366	0	1	1	1090.12	-0.318005	0.243735	0	1	1	FALSE
ACFLL8_04885	htpG	1133607	1135490	+	628	molecular chaperone HtpG	1467.23	0.80915	0.33959	0	1	1	1467.23	0.512539	0.339991	0	1	1	FALSE
ACFLL8_04890		1135819	1136733	+	305	glucosaminidase domain-containing protein	501.332	0.216396	0.226532	0	1	1	501.332	0.2079	0.227614	0	1	1	FALSE
ACFLL8_04895		1136803	1138896	+	698	ATP-dependent helicase	1168.8	0.965445	0.16395	0	1	1	1168.8	0.580076	0.165113	0	1	1	FALSE
ACFLL8_04900		1138931	1140577	+	549	YdiU family protein	740.156	0.374327	0.188399	0	1	1	740.156	0.491463	0.188967	0	1	1	FALSE
ACFLL8_04905		1141185	1142417	+	411	NAD%28P%29 transhydrogenase subunit alpha	4582.32	0.565613	0.223888	0	1	1	4582.32	0.482387	0.224023	0	1	1	FALSE
ACFLL8_04910		1142414	1142746	+	111	NAD%28P%29 transhydrogenase subunit alpha	996.011	0.917968	0.200186	0	1	1	996.011	0.542945	0.201296	0	1	1	FALSE
ACFLL8_04915		1142746	1144134	+	463	NAD%28P%29%28%2B%29 transhydrogenase %28Re/Si-specific%29 subunit beta	3810.62	0.383221	0.170953	0	1	1	3810.62	0.320077	0.171163	0	1	1	FALSE
ACFLL8_04920		1144444	1145571	+	376	NAD%28P%29H-dependent glycerol-3-phosphate dehydrogenase	369.143	0.523267	0.214529	0	1	1	369.143	0.435795	0.216303	0	1	1	FALSE
ACFLL8_04925	sixA	1145713	1146222	+	170	phosphohistidine phosphatase SixA	664.928	-0.308138	0.254108	0	1	1	664.928	0.529953	0.253186	0	1	1	FALSE
ACFLL8_04930		1146328	1147278	-	317	AEC family transporter	408.826	0.216109	0.22541	0	1	1	408.826	-0.157598	0.228143	0	1	1	FALSE
ACFLL8_04935		1147325	1147513	-	63	hypothetical protein	80.987	0.103585	0.2755	0	1	1	80.987	-0.025918	0.282947	0	1	1	FALSE
ACFLL8_04940		1147723	1148907	+	395	ABC transporter ATP-binding protein	325.432	1.23777	0.247398	0.961066	0.336519	1	325.432	0.214439	0.252837	0	1	1	FALSE
ACFLL8_04945		1148904	1151621	+	906	Gldg family protein	804.609	0.831002	0.200471	0	1	1	804.609	-0.15405	0.203289	0	1	1	FALSE
ACFLL8_04950		1151618	1152865	+	416	DUF4340 domain-containing protein	389.77	0.891418	0.284509	0	1	1	389.77	0.0548365	0.288008	0	1	1	FALSE
ACFLL8_04955		1152963	1153901	+	313	alpha/beta fold hydrolase	516.895	0.608472	0.249754	0	1	1	516.895	0.0104757	0.252185	0	1	1	FALSE
ACFLL8_04960		1153898	1154854	+	319	alpha/beta fold hydrolase	588.03	0.698321	0.197015	0	1	1	588.03	0.159524	0.199486	0	1	1	FALSE
ACFLL8_04965		1154903	1156141	+	413	patatin-like phospholipase family protein	1059.82	0.622022	0.258416	0	1	1	1059.82	0.0178331	0.259571	0	1	1	FALSE
ACFLL8_04970		1156238	1157080	-	281	transporter substrate-binding domain-containing protein	424.449	2.67283	0.322401	5.18866	2.11812e-07	2.76615e-06	424.449	0.20401	0.330823	0	1	1	FALSE
ACFLL8_04975		1157211	1157816	-	202	Smr/MutS family protein	122.347	0.976137	0.268361	0	1	1	122.347	0.0441143	0.280931	0	1	1	FALSE
ACFLL8_04980	prmB	1158068	1159030	+	321	50S ribosomal protein L3 N%285%29-glutamine methyltransferase	520.835	0.925229	0.22594	0	1	1	520.835	0.664204	0.227507	0	1	1	FALSE
ACFLL8_04985	aroC	1159142	1160233	+	364	chorismate synthase	1090.53	1.75425	0.207362	3.63737	0.00027543	0.00207938	1090.53	0.623648	0.209368	0	1	1	FALSE
ACFLL8_04990		1160524	1161033	+	170	DUF6489 family protein	304.873	0.34121	0.252285	0	1	1	304.873	0.694503	0.252376	0	1	1	FALSE
ACFLL8_04995		1161204	1161653	+	150	phasin family protein	16764.3	-3.64341	0.215401	-12.272	1.27975e-34	1.95467e-32	16764.3	0.372582	0.214331	0	1	1	FALSE
ACFLL8_05000	phaC	1162163	1163893	+	577	class I poly%28R%29-hydroxyalkanoic acid synthase	15487.9	-3.15691	0.261461	-8.24946	1.59111e-16	5.47997e-15	15487.9	0.143794	0.260861	0	1	1	FALSE
ACFLL8_05005		1165092	1165982	-	297	LysR family transcriptional regulator	296.892	-2.07956	0.23656	-4.56357	5.02912e-06	5.40284e-05	296.892	-0.015699	0.223179	0	1	1	FALSE
ACFLL8_05010	leuC	1166303	1167754	+	484	3-isopropylmalate dehydratase large subunit	1449.83	0.287499	0.167289	0	1	1	1449.83	-0.20566	0.168502	0	1	1	FALSE
ACFLL8_05015	leuD	1167766	1168419	+	218	3-isopropylmalate dehydratase small subunit	640.493	-0.15211	0.258998	0	1	1	640.493	0.120198	0.259209	0	1	1	FALSE
ACFLL8_05020	leuB	1168563	1169645	+	361	3-isopropylmalate dehydrogenase	3152.87	0.818874	0.338531	0	1	1	3152.87	0.0821028	0.338864	0	1	1	FALSE
ACFLL8_05025	asd	1169866	1170987	+	374	aspartate-semialdehyde dehydrogenase	2588.98	1.23746	0.411201	0.577488	0.56361	1	2588.98	-0.0230306	0.411716	0	1	1	FALSE
ACFLL8_05030		1171578	1174343	+	922	FimV/HubP family polar landmark protein	10392.6	-0.471152	0.29399	0	1	1	10392.6	-0.795539	0.294082	0	1	1	FALSE
ACFLL8_05035	truA	1174343	1175386	+	348	tRNA pseudouridine%2838-40%29 synthase TruA	468.494	-0.916856	0.225058	0	1	1	468.494	-1.2815	0.228325	-1.23291	0.217609	1	FALSE
ACFLL8_05040		1175409	1176041	+	211	phosphoribosylanthranilate isomerase	593.977	-0.711506	0.249205	0	1	1	593.977	-0.896252	0.250794	0	1	1	FALSE
ACFLL8_05045	accD	1176386	1177417	+	344	acetyl-CoA carboxylase%2C carboxyltransferase subunit beta	2303.35	-0.0907948	0.194587	0	1	1	2303.35	-0.0368897	0.194832	0	1	1	FALSE
ACFLL8_05050		1177410	1178855	+	482	bifunctional folylpolyglutamate synthase/dihydrofolate synthase	3209.24	-0.591454	0.187733	0	1	1	3209.24	-0.0992634	0.187662	0	1	1	FALSE
ACFLL8_05055		1178907	1179599	+	231	SPOR domain-containing protein	915.213	0.182675	0.209545	0	1	1	915.213	-0.198606	0.210887	0	1	1	FALSE
ACFLL8_05060		1179596	1180273	+	226	CvpA family protein	1620.75	-0.115986	0.184584	0	1	1	1620.75	-0.331024	0.185286	0	1	1	FALSE
ACFLL8_05065	purF	1180519	1182033	+	505	amidophosphoribosyltransferase	5038.61	1.0462	0.191963	0.240679	0.809804	1	5038.61	-0.0983266	0.192491	0	1	1	FALSE
ACFLL8_05070		1182266	1183483	+	406	O-succinylhomoserine sulfhydrylase	1042.63	1.03667	0.188175	0.19486	0.845502	1	1042.63	-0.186553	0.190952	0	1	1	FALSE
ACFLL8_05075		1183773	1184315	+	181	cytochrome b	816.87	1.14077	0.182104	0.773011	0.439516	1	816.87	0.209489	0.184851	0	1	1	FALSE
ACFLL8_05080		1184375	1184992	+	206	YceI family protein	2253.02	0.196452	0.172332	0	1	1	2253.02	0.123058	0.172707	0	1	1	FALSE
ACFLL8_05085		1185113	1185730	-	206	LysE family translocator	318.295	0.789745	0.241646	0	1	1	318.295	0.0983064	0.246026	0	1	1	FALSE
ACFLL8_05090		1186121	1186987	-	289	2OG-Fe dioxygenase family protein	374.539	-0.252992	0.197339	0	1	1	374.539	0.296816	0.196549	0	1	1	FALSE
ACFLL8_05095		1187661	1189451	+	597	putative bifunctional diguanylate cyclase/phosphodiesterase	4974.36	-0.135502	0.27899	0	1	1	4974.36	-0.57075	0.279208	0	1	1	FALSE
ACFLL8_05100	dinB	1189848	1190906	-	353	DNA polymerase IV	138.333	0.347537	0.248015	0	1	1	138.333	0.127735	0.253512	0	1	1	FALSE
ACFLL8_05105		1191061	1192407	-	449	Na%2B/H%2B antiporter family protein	373.866	2.24952	0.247348	5.05168	4.37934e-07	5.47496e-06	373.866	0.237611	0.256593	0	1	1	FALSE
ACFLL8_05110		1192707	1193327	+	207	YrbL family protein	115.814	0.483367	0.282395	0	1	1	115.814	-0.358063	0.295083	0	1	1	FALSE
ACFLL8_05115	bioA	1193545	1194849	-	435	adenosylmethionine--8-amino-7-oxononanoate transaminase	474.149	0.7767	0.216721	0	1	1	474.149	0.213956	0.219549	0	1	1	FALSE
ACFLL8_05120		1195534	1195920	+	129	histone-like nucleoid-structuring protein%2C MvaT/MvaU family	17028.5	1.45799	0.272987	1.67771	0.0934038	0.3789	17028.5	-0.162687	0.273141	0	1	1	FALSE
ACFLL8_05125		1196164	1196967	-	268	anti-sigma factor domain-containing protein	797.313	1.32887	0.220325	1.49267	0.135523	0.518619	797.313	0.480801	0.222413	0	1	1	FALSE
ACFLL8_05130		1196964	1197542	-	193	RNA polymerase sigma factor	260.842	0.290488	0.258593	0	1	1	260.842	0.486061	0.259419	0	1	1	FALSE
ACFLL8_05135		1197942	1198826	+	295	NAD%28%2B%29 kinase	1533.74	0.446787	0.198117	0	1	1	1533.74	-0.26383	0.199338	0	1	1	FALSE
ACFLL8_05140		1198843	1199910	+	356	metallophosphoesterase	1026.4	0.202544	0.183596	0	1	1	1026.4	0.0859531	0.184446	0	1	1	FALSE
ACFLL8_05145		1200227	1201117	+	297	rhomboid family intramembrane serine protease	570.926	-1.20559	0.177532	-1.15804	0.246847	0.858589	570.926	-0.698424	0.176963	0	1	1	FALSE
ACFLL8_05150		1201226	1201504	+	93	YeaC family protein	263.07	0.489276	0.297718	0	1	1	263.07	-0.218647	0.302373	0	1	1	FALSE
ACFLL8_05155		1201492	1202439	+	316	DUF2797 domain-containing protein	672.205	-0.376432	0.169618	0	1	1	672.205	-0.415091	0.170962	0	1	1	FALSE
ACFLL8_05160		1202604	1204157	-	518	RimK family protein	557.667	1.35918	0.193089	1.86017	0.0628616	0.270297	557.667	1.04917	0.194835	0.25235	0.80077	1	FALSE
ACFLL8_05165		1204378	1205004	+	209	GNAT family N-acetyltransferase	217.38	1.22701	0.278416	0.815363	0.414865	1	217.38	1.00581	0.281137	0.0206759	0.983504	1	FALSE
ACFLL8_05170		1205083	1205571	+	163	YajQ family cyclic di-GMP-binding protein	957.007	3.48453	0.295307	8.41336	3.98446e-17	1.42831e-15	957.007	0.680207	0.300231	0	1	1	FALSE
ACFLL8_05175		1205822	1206664	+	281	S1 RNA-binding domain-containing protein	342.803	1.51114	0.250808	2.03798	0.0415519	0.192068	342.803	0.88796	0.254067	0	1	1	FALSE
ACFLL8_05180		1206981	1208132	+	384	glycerate kinase	585.989	0.0463166	0.240188	0	1	1	585.989	0.353227	0.240346	0	1	1	FALSE
ACFLL8_05185		1208306	1208776	+	157	YbaN family protein	1202.81	-0.407322	0.183955	0	1	1	1202.81	0.244069	0.183524	0	1	1	FALSE
ACFLL8_05190	pepN	1208904	1211555	+	884	aminopeptidase N	2449.83	-0.517495	0.158696	0	1	1	2449.83	0.360986	0.158239	0	1	1	FALSE
ACFLL8_05195	rsgA	1211684	1212694	-	337	small ribosomal subunit biogenesis GTPase RsgA	352.809	0.743838	0.243546	0	1	1	352.809	0.148053	0.247087	0	1	1	FALSE
ACFLL8_05200	orn	1212878	1213450	+	191	oligoribonuclease	515.99	-0.711092	0.20786	0	1	1	515.99	0.243497	0.205865	0	1	1	FALSE
ACFLL8_05205	queG	1213470	1214540	-	357	tRNA epoxyqueuosine%2834%29 reductase QueG	759.888	-1.19073	0.192208	-0.992324	0.321039	1	759.888	-0.246176	0.190564	0	1	1	FALSE
ACFLL8_05210		1214865	1216661	+	599	NAD%28P%29H-hydrate dehydratase	1059.88	0.217042	0.212696	0	1	1	1059.88	0.237507	0.213198	0	1	1	FALSE
ACFLL8_05215	tsaE	1216642	1217127	+	162	tRNA %28adenosine%2837%29-N6%29-threonylcarbamoyltransferase complex ATPase subunit type 1 TsaE	618.984	0.457107	0.183942	0	1	1	618.984	-0.28746	0.187296	0	1	1	FALSE
ACFLL8_05220		1217221	1218705	+	495	N-acetylmuramoyl-L-alanine amidase	3183.54	-0.487757	0.182202	0	1	1	3183.54	-0.0189001	0.182144	0	1	1	FALSE
ACFLL8_05225	mutL	1218901	1221177	+	759	DNA mismatch repair endonuclease MutL	2336.57	-0.136165	0.180056	0	1	1	2336.57	0.0501213	0.180208	0	1	1	FALSE
ACFLL8_05230	miaA	1221238	1222221	+	328	tRNA %28adenosine%2837%29-N6%29-dimethylallyltransferase MiaA	5942.46	0.784688	0.194524	0	1	1	5942.46	0.49383	0.194696	0	1	1	FALSE
ACFLL8_05235	hfq	1222337	1222585	+	83	RNA chaperone Hfq	7553.36	2.09474	0.225675	4.85099	1.2285e-06	1.42904e-05	7553.36	0.298591	0.226116	0	1	1	FALSE
ACFLL8_05240	hflX	1222601	1223971	+	457	ribosome rescue GTPase HflX	3564.01	-0.549743	0.154601	0	1	1	3564.01	-0.169235	0.154599	0	1	1	FALSE
ACFLL8_05245	hflK	1224259	1225491	+	411	FtsH protease activity modulator HflK	2581.35	-0.786759	0.204402	0	1	1	2581.35	-0.374414	0.204376	0	1	1	FALSE
ACFLL8_05250	hflC	1225488	1226369	+	294	protease modulator HflC	2382.58	-0.399497	0.194898	0	1	1	2382.58	-0.15705	0.195002	0	1	1	FALSE
ACFLL8_05255		1226770	1227954	+	395	ATP phosphoribosyltransferase regulatory subunit	1279.71	0.174485	0.192288	0	1	1	1279.71	0.235414	0.192698	0	1	1	FALSE
ACFLL8_05260		1228089	1229384	+	432	adenylosuccinate synthase	2844.11	0.639729	0.196502	0	1	1	2844.11	0.147568	0.196993	0	1	1	FALSE
ACFLL8_05265		1229710	1230240	+	177	SUF system Fe-S cluster assembly regulator	373.5	0.826447	0.208742	0	1	1	373.5	-0.37246	0.215786	0	1	1	FALSE
ACFLL8_05270	sufB	1230366	1231808	+	481	Fe-S cluster assembly protein SufB	1113.96	0.110597	0.160438	0	1	1	1113.96	-0.40458	0.162201	0	1	1	FALSE
ACFLL8_05275	sufC	1231884	1232633	+	250	Fe-S cluster assembly ATPase SufC	271.002	-0.782242	0.289238	0	1	1	271.002	-0.500094	0.289716	0	1	1	FALSE
ACFLL8_05280	sufD	1232633	1234045	+	471	Fe-S cluster assembly protein SufD	881.962	-0.6349	0.175343	0	1	1	881.962	-0.18385	0.175162	0	1	1	FALSE
ACFLL8_05285		1234042	1235286	+	415	cysteine desulfurase	1264.81	-0.369098	0.189901	0	1	1	1264.81	-0.119551	0.190089	0	1	1	FALSE
ACFLL8_05290	sufT	1235452	1236027	+	192	putative Fe-S cluster assembly protein SufT	257.917	-0.118018	0.210117	0	1	1	257.917	-0.289742	0.213662	0	1	1	FALSE
ACFLL8_05295		1236194	1236799	+	202	YceI family protein	726.059	0.0294606	0.195369	0	1	1	726.059	0.582058	0.194975	0	1	1	FALSE
ACFLL8_05300		1236958	1237644	+	229	vancomycin high temperature exclusion protein	2083.62	0.698683	0.22478	0	1	1	2083.62	0.71652	0.225003	0	1	1	FALSE
ACFLL8_05305		1237756	1238214	-	153	hypothetical protein	2227.21	0.937952	0.290213	0	1	1	2227.21	0.385316	0.290648	0	1	1	FALSE
ACFLL8_05310	rimK	1238426	1239334	-	303	30S ribosomal protein S6--L-glutamate ligase	1290.69	-2.40896	0.273445	-5.15264	2.56846e-07	3.28828e-06	1290.69	-0.402998	0.270636	0	1	1	FALSE
ACFLL8_05315		1239486	1239995	-	170	ATP-dependent zinc protease	1226.87	-0.880333	0.185018	0	1	1	1226.87	-0.213241	0.184515	0	1	1	FALSE
ACFLL8_05320		1240520	1241638	-	373	DUF3549 family protein	487.636	-0.668471	0.212694	0	1	1	487.636	0.131308	0.211191	0	1	1	FALSE
ACFLL8_05325		1242403	1243137	+	245	amino acid ABC transporter substrate-binding protein	1375.08	1.93805	0.257772	3.63908	0.00027361	0.00207157	1375.08	-0.184554	0.26052	0	1	1	FALSE
ACFLL8_05330		1243367	1244041	+	225	amino acid ABC transporter permease	205.748	0.703961	0.250969	0	1	1	205.748	-0.0654943	0.258149	0	1	1	FALSE
ACFLL8_05335		1244038	1244802	+	255	amino acid ABC transporter ATP-binding protein	433.009	0.999422	0.236712	0	1	1	433.009	0.0540105	0.240844	0	1	1	FALSE
ACFLL8_05340		1244958	1245215	-	86	late competence development ComFB family protein	597.649	-2.39782	0.306792	-4.55623	5.20806e-06	5.56107e-05	597.649	-0.901894	0.302993	0	1	1	FALSE
ACFLL8_05345		1245353	1247341	-	663	cation:proton antiporter	672.649	-0.674953	0.228836	0	1	1	672.649	-0.67533	0.229818	0	1	1	FALSE
ACFLL8_05350		1247418	1247783	+	122	YqcC family protein	584.601	1.67805	0.249541	2.7172	0.00658374	0.038356	584.601	-0.0283768	0.254559	0	1	1	FALSE
ACFLL8_05355		1247812	1248312	+	167	gamma-glutamylcyclotransferase family protein	294.917	0.268157	0.244574	0	1	1	294.917	-0.0010112	0.247494	0	1	1	FALSE
ACFLL8_05360	brnQ	1248427	1249767	-	447	branched-chain amino acid transport system II carrier protein	171.863	0.863316	0.333006	0	1	1	171.863	-0.111299	0.34079	0	1	1	FALSE
ACFLL8_05365		1250042	1251256	-	405	DUF1853 family protein	541.303	-0.642725	0.18054	0	1	1	541.303	-0.172041	0.180181	0	1	1	FALSE
ACFLL8_05370		1252185	1252526	+	114	hypothetical protein	193.464	-0.741024	0.259212	0	1	1	193.464	-0.291548	0.258655	0	1	1	FALSE
ACFLL8_05375		1252643	1252975	+	111	hypothetical protein	114.302	-0.923093	0.248211	0	1	1	114.302	-0.761258	0.2514	0	1	1	FALSE
ACFLL8_05380		1253400	1254161	+	254	haloacid dehalogenase type II	658.989	1.24939	0.262408	0.950376	0.341921	1	658.989	-0.238615	0.266212	0	1	1	FALSE
ACFLL8_05385		1254769	1255452	+	228	alpha/beta hydrolase	1015.7	0.643933	0.168411	0	1	1	1015.7	0.0678735	0.170184	0	1	1	FALSE
ACFLL8_05390		1255531	1256055	-	175	DUF6314 family protein	165.376	0.630021	0.236982	0	1	1	165.376	0.120485	0.24404	0	1	1	FALSE
ACFLL8_05395		1256084	1256971	+	296	carboxylate/amino acid/amine transporter	236.588	1.29502	0.234503	1.25807	0.208365	0.745402	236.588	-0.316007	0.247223	0	1	1	FALSE
ACFLL8_05400		1256968	1258611	-	548	PLP-dependent aminotransferase family protein	433.542	-0.142619	0.228784	0	1	1	433.542	-0.323563	0.230779	0	1	1	FALSE
ACFLL8_05405		1258772	1259734	+	321	DMT family transporter	298.855	-0.573303	0.215721	0	1	1	298.855	0.327803	0.212801	0	1	1	FALSE
ACFLL8_05410		1259816	1260520	-	235	OmpW family protein	3735.97	-0.561583	0.261611	0	1	1	3735.97	-0.281162	0.261648	0	1	1	FALSE
ACFLL8_05415		1260799	1261392	-	198	OmpW family protein	8996.85	-1.90294	0.326405	-2.76631	0.00566941	0.0334733	8996.85	-0.609058	0.326242	0	1	1	FALSE
ACFLL8_05420		1261757	1262620	-	288	lipopolysaccharide kinase InaA family protein	496.478	-0.255365	0.231917	0	1	1	496.478	-0.527259	0.234008	0	1	1	FALSE
ACFLL8_05425		1263174	1264775	+	534	cytochrome ubiquinol oxidase subunit I	2169.5	-0.66165	0.445417	0	1	1	2169.5	-1.15866	0.445816	-0.355888	0.721924	1	FALSE
ACFLL8_05430	cydB	1264782	1265915	+	378	cytochrome d ubiquinol oxidase subunit II	1528.2	-3.06951	0.361627	-5.72278	1.04794e-08	1.61466e-07	1528.2	-1.3238	0.359626	-0.900368	0.367924	1	FALSE
ACFLL8_05435	cydX	1266006	1266107	+	34	cytochrome bd-I oxidase subunit CydX	34.8141	-2.81413	0.472885	-3.83631	0.0001249	0.00102039	34.8141	-1.09763	0.410546	-0.237808	0.81203	1	FALSE
ACFLL8_05440		1266166	1266468	+	101	cyd operon YbgE family protein	288.96	-0.519157	0.207825	0	1	1	288.96	-0.0608337	0.207334	0	1	1	FALSE
ACFLL8_05445		1266975	1268081	+	369	glycosyltransferase family 2 protein	1491.34	-1.00016	0.201951	-0.0007764	0.999381	1	1491.34	0.0428516	0.201071	0	1	1	FALSE
ACFLL8_05450		1268071	1268490	+	140	GtrA family protein	288.431	-1.28855	0.268574	-1.07437	0.282659	0.956628	288.431	0.122419	0.262827	0	1	1	FALSE
ACFLL8_05455		1268496	1269707	+	404	hypothetical protein	776.212	-0.902174	0.232328	0	1	1	776.212	0.159763	0.230856	0	1	1	FALSE
ACFLL8_05460		1269682	1270407	+	242	hypothetical protein	1018.96	-0.766523	0.252203	0	1	1	1018.96	0.00768468	0.251618	0	1	1	FALSE
ACFLL8_05465		1270594	1271433	+	280	mechanosensitive ion channel family protein	2112.8	1.53699	0.223952	2.39778	0.0164946	0.087796	2112.8	0.143256	0.22519	0	1	1	FALSE
ACFLL8_05470		1271593	1273326	+	578	glucosyltransferase domain-containing protein	1522.02	-0.766687	0.261151	0	1	1	1522.02	1.14585	0.259642	0.561741	0.574292	1	FALSE
ACFLL8_05475	putP	1273441	1274922	-	494	sodium/proline symporter PutP	8582.47	-1.89621	0.311288	-2.87903	0.00398897	0.0245416	8582.47	-0.120068	0.31102	0	1	1	FALSE
ACFLL8_05480	putA	1275393	1278683	-	1097	bifunctional proline dehydrogenase/L-glutamate gamma-semialdehyde dehydrogenase PutA	1998.63	-0.406409	0.18615	0	1	1	1998.63	0.43137	0.185723	0	1	1	FALSE
ACFLL8_05485		1279093	1279851	-	253	helix-turn-helix domain-containing protein	242.028	-0.405849	0.283237	0	1	1	242.028	0.352036	0.281311	0	1	1	FALSE
ACFLL8_05490		1279851	1280216	-	122	hypothetical protein	395.618	1.29118	0.25312	1.15035	0.249999	0.866788	395.618	0.0321837	0.258486	0	1	1	FALSE
ACFLL8_05495		1280395	1281063	+	223	helix-turn-helix domain-containing protein	432.647	1.1173	0.19949	0.588013	0.556524	1	432.647	0.476793	0.202977	0	1	1	FALSE
ACFLL8_05500		1281155	1282675	-	507	tripartite tricarboxylate transporter permease	421.908	-0.113554	0.255502	0	1	1	421.908	-0.154371	0.256839	0	1	1	FALSE
ACFLL8_05505		1282675	1283112	-	146	tripartite tricarboxylate transporter TctB family protein	114.043	-0.905368	0.353172	0	1	1	114.043	-0.269723	0.350622	0	1	1	FALSE
ACFLL8_05510		1283112	1284098	-	329	Bug family tripartite tricarboxylate transporter substrate binding protein	831.634	0.156177	0.31731	0	1	1	831.634	-0.633373	0.318953	0	1	1	FALSE
ACFLL8_05515		1284491	1286086	+	532	MFS transporter	135.059	-0.231738	0.290485	0	1	1	135.059	1.13655	0.281874	0.48443	0.62808	1	FALSE
ACFLL8_05520		1286137	1287207	-	357	Bug family tripartite tricarboxylate transporter substrate binding protein	561.268	1.5462	0.320833	1.70246	0.0886698	0.361785	561.268	0.193432	0.323964	0	1	1	FALSE
ACFLL8_05525		1287517	1288557	+	347	adenosine deaminase	949.25	-0.295801	0.242749	0	1	1	949.25	0.308403	0.242413	0	1	1	FALSE
ACFLL8_05535		1288956	1290185	+	410	tyrosine-type recombinase/integrase	708.786	0.975915	0.246798	0	1	1	708.786	0.70913	0.247857	0	1	1	FALSE
ACFLL8_05540		1290182	1290418	-	79	helix-turn-helix transcriptional regulator	485.579	0.750772	0.24533	0	1	1	485.579	0.348586	0.247315	0	1	1	FALSE
ACFLL8_05545		1290913	1291953	-	347	dATP/dGTP diphosphohydrolase domain-containing protein	1259.97	-1.21795	0.185191	-1.17687	0.239249	0.837133	1259.97	0.61418	0.182527	0	1	1	FALSE
ACFLL8_05550		1291982	1292269	-	96	hypothetical protein	36.966	-1.86627	0.443733	-1.95222	0.0509116	0.230777	36.966	0.804818	0.361166	0	1	1	FALSE
ACFLL8_05555		1292287	1293204	-	306	recombination-associated protein RdgC	75.9309	-2.13973	0.348074	-3.27438	0.00105892	0.0072093	75.9309	0.0907175	0.30687	0	1	1	FALSE
ACFLL8_05560		1293725	1294009	-	95	hypothetical protein	62.8592	-0.962963	0.334268	0	1	1	62.8592	-0.138715	0.325739	0	1	1	FALSE
ACFLL8_05565		1294397	1295056	-	220	LexA family protein	906.55	1.53594	0.181337	2.9555	0.00312159	0.0197588	906.55	-0.022208	0.185372	0	1	1	FALSE
ACFLL8_05570		1295193	1295390	+	66	hypothetical protein	101.269	-0.201543	0.340386	0	1	1	101.269	-1.04436	0.354777	-0.125034	0.900497	1	FALSE
ACFLL8_05575		1295469	1295933	+	155	phage regulatory CII family protein	69.2591	-0.460049	0.388514	0	1	1	69.2591	-0.437675	0.393439	0	1	1	FALSE
ACFLL8_05580		1296010	1296327	+	106	hypothetical protein	28.1622	-3.31863	0.580763	-3.99239	6.54108e-05	0.00056598	28.1622	-0.376446	0.427094	0	1	1	FALSE
ACFLL8_05585		1296324	1296584	+	87	hypothetical protein	14.6713	-2.30295	0.624759	-2.08552	0.0370221	0.175029	14.6713	-0.625143	0.535202	0	1	1	FALSE
ACFLL8_05590		1296581	1297417	+	279	helix-turn-helix domain-containing protein	86.7348	-2.29651	0.312223	-4.15252	3.28837e-05	0.000304	86.7348	-0.60576	0.282471	0	1	1	FALSE
ACFLL8_05595		1297512	1298102	+	197	hypothetical protein	52.0753	-2.85414	0.457788	-4.05021	5.11707e-05	0.00045625	52.0753	-0.526057	0.395584	0	1	1	FALSE
ACFLL8_05600		1298095	1298322	+	76	hypothetical protein	21.0173	-1.01881	0.496158	-0.0379188	0.969752	1	21.0173	0.136134	0.465813	0	1	1	FALSE
ACFLL8_05605		1298331	1298696	+	122	hypothetical protein	31.4493	-3.23861	0.521532	-4.29237	1.76775e-05	0.00017444	31.4493	-0.543607	0.389486	0	1	1	FALSE
ACFLL8_05610		1298875	1299192	+	106	hypothetical protein	55.112	-0.827592	0.381187	0	1	1	55.112	0.595515	0.361879	0	1	1	FALSE
ACFLL8_05615		1299183	1299461	+	93	hypothetical protein	23.0101	-0.97601	0.534712	0	1	1	23.0101	0.641668	0.493491	0	1	1	FALSE
ACFLL8_05620		1299458	1299964	+	169	VRR-NUC domain-containing protein	45.8487	-1.03555	0.386578	-0.0919683	0.926723	1	45.8487	0.208991	0.3667	0	1	1	FALSE
ACFLL8_05625		1300000	1300560	+	187	hypothetical protein	28.4267	-0.665906	0.434451	0	1	1	28.4267	0.586851	0.407997	0	1	1	FALSE
ACFLL8_05630		1300702	1300944	+	81	hypothetical protein	2173.09	0.783126	0.311606	0	1	1	2173.09	0.0491643	0.312133	0	1	1	FALSE
ACFLL8_05635		1301012	1301542	+	177	glycoside hydrolase family 104 protein	108.431	-2.27653	0.270561	-4.71808	2.38081e-06	2.6807e-05	108.431	-0.97071	0.250959	0	1	1	FALSE
ACFLL8_05640		1301587	1301940	+	118	phage holin%2C lambda family	46.3296	-2.2982	0.465631	-2.78805	0.0053026	0.0314132	46.3296	-0.257736	0.418536	0	1	1	FALSE
ACFLL8_05645		1301928	1302353	+	142	hypothetical protein	134.416	-1.89166	0.29211	-3.05249	0.00226949	0.0148932	134.416	0.0806983	0.270652	0	1	1	FALSE
ACFLL8_05650		1302744	1303253	+	170	KilA-N domain-containing protein	269.676	-1.08647	0.250277	-0.345492	0.729725	1	269.676	0.633976	0.242016	0	1	1	FALSE
ACFLL8_05655		1303346	1303537	-	64	DUF2188 domain-containing protein	259.259	0.71102	0.402643	0	1	1	259.259	1.1985	0.402341	0.49335	0.621765	1	FALSE
ACFLL8_05660		1303970	1304470	+	167	DUF1441 family protein	71.9941	-1.77203	0.399345	-1.93324	0.0532068	0.238413	71.9941	0.0354953	0.374207	0	1	1	FALSE
ACFLL8_05665		1304463	1306526	+	688	phage terminase large subunit family protein	336.755	-1.2758	0.202336	-1.36308	0.172856	0.63786	336.755	-0.161271	0.197658	0	1	1	FALSE
ACFLL8_05670		1306560	1306799	+	80	phage tail protein	24.1822	-1.68984	0.543295	-1.26973	0.204181	0.735823	24.1822	-0.229001	0.502468	0	1	1	FALSE
ACFLL8_05675		1306801	1308297	+	499	phage portal protein	227.247	-1.89128	0.234528	-3.80034	0.0001445	0.00116429	227.247	-0.314324	0.222757	0	1	1	FALSE
ACFLL8_05680		1308307	1309365	+	353	head maturation protease%2C ClpP-related	191.639	-1.97176	0.253187	-3.83809	0.00012399	0.00101536	191.639	-0.39495	0.23989	0	1	1	FALSE
ACFLL8_05685		1309387	1309803	+	139	head decoration protein	102.153	-0.583145	0.262272	0	1	1	102.153	0.0358559	0.258983	0	1	1	FALSE
ACFLL8_05690		1309903	1310898	+	332	major capsid protein	284.868	-1.9862	0.23409	-4.21289	2.52124e-05	0.000242	284.868	-0.544758	0.225472	0	1	1	FALSE
ACFLL8_05695		1310903	1311220	+	106	hypothetical protein	49.6927	-1.76811	0.394257	-1.94825	0.0513848	0.231348	49.6927	-0.888737	0.380851	0	1	1	FALSE
ACFLL8_05700		1311223	1311831	+	203	phage tail protein	117.08	-2.1802	0.277182	-4.25787	2.06383e-05	0.00020084	117.08	-0.249824	0.249075	0	1	1	FALSE
ACFLL8_05705		1311853	1312347	+	165	hypothetical protein	83.9453	-1.5873	0.304321	-1.92987	0.0536231	0.239362	83.9453	-0.0458365	0.282504	0	1	1	FALSE
ACFLL8_05710		1312400	1313152	+	251	hypothetical protein	227.82	-1.96232	0.263146	-3.65698	0.0002552	0.00194895	227.82	-0.190346	0.25076	0	1	1	FALSE
ACFLL8_05715		1313223	1313750	+	176	hypothetical protein	254.424	0.761092	0.267099	0	1	1	254.424	-0.534029	0.276002	0	1	1	FALSE
ACFLL8_05720		1313810	1317283	+	1158	hypothetical protein	577.801	-1.28577	0.226835	-1.25982	0.207736	0.743911	577.801	0.006177	0.223839	0	1	1	FALSE
ACFLL8_05725		1317317	1317715	+	133	hypothetical protein	81.8174	-0.971064	0.321488	0	1	1	81.8174	0.183489	0.309697	0	1	1	FALSE
ACFLL8_05730		1317745	1321122	+	1126	hypothetical protein	742.255	-1.61876	0.232054	-2.66645	0.00766575	0.0440029	742.255	-0.35708	0.229612	0	1	1	FALSE
ACFLL8_05735		1321188	1322453	+	422	hypothetical protein	338.979	-0.198216	0.192951	0	1	1	338.979	-0.233162	0.195161	0	1	1	FALSE
ACFLL8_05740		1322450	1322932	+	161	carboxypeptidase-like regulatory domain-containing protein	142.574	-0.619526	0.280154	0	1	1	142.574	-0.0208585	0.27811	0	1	1	FALSE
ACFLL8_05745		1322929	1323330	+	134	hypothetical protein	109.693	-1.31856	0.290244	-1.09755	0.272401	0.928297	109.693	-0.392505	0.282599	0	1	1	FALSE
ACFLL8_05750		1323339	1325423	+	695	hypothetical protein	566.917	-1.18652	0.218868	-0.852194	0.394106	1	566.917	0.00515546	0.216123	0	1	1	FALSE
ACFLL8_05755		1325466	1325687	+	74	hypothetical protein	19.4598	0.503935	0.482878	0	1	1	19.4598	-0.209434	0.520548	0	1	1	FALSE
ACFLL8_05760		1325757	1326179	+	141	cold shock domain-containing protein	4678.89	1.29836	0.248926	1.19857	0.230693	0.812864	4678.89	-0.221191	0.249504	0	1	1	FALSE
ACFLL8_05765		1326504	1327844	-	447	reverse transcriptase domain-containing protein	14755.2	-1.1918	0.204712	-0.936918	0.348801	1	14755.2	-0.891635	0.204724	0	1	1	FALSE
ACFLL8_05770		1327832	1328404	-	191	SLATT domain-containing protein	9883.83	-0.262556	0.189751	0	1	1	9883.83	-0.52638	0.189879	0	1	1	FALSE
ACFLL8_05775		1329125	1329763	+	213	LysE family translocator	78.2983	1.37711	0.343696	1.09721	0.272551	0.928297	78.2983	-0.387438	0.372465	0	1	1	FALSE
ACFLL8_05780		1329874	1330869	-	332	TRAP transporter substrate-binding protein	698.477	-1.98599	0.359211	-2.74488	0.00605321	0.0355007	698.477	-1.10921	0.358089	-0.304994	0.760371	1	FALSE
ACFLL8_05785	dctP	1331032	1332027	-	332	TRAP transporter substrate-binding protein DctP	1544.56	-1.57929	0.35567	-1.62873	0.103371	0.4136	1544.56	-0.873414	0.355374	0	1	1	FALSE
ACFLL8_05790		1332317	1332910	+	198	Yip1 family protein	10598.6	-2.23869	0.358066	-3.4594	0.00054138	0.00390528	10598.6	-0.277163	0.357828	0	1	1	FALSE
ACFLL8_05795		1333095	1334051	+	319	sugar-binding transcriptional regulator	1851.13	-0.427608	0.173361	0	1	1	1851.13	-0.152224	0.173474	0	1	1	FALSE
ACFLL8_05800		1334760	1336103	+	448	ABC transporter substrate-binding protein	523.464	-0.794504	0.300323	0	1	1	523.464	-0.524308	0.300593	0	1	1	FALSE
ACFLL8_05805		1336347	1337234	+	296	carbohydrate ABC transporter permease	248.501	0.162221	0.216632	0	1	1	248.501	0.215388	0.218553	0	1	1	FALSE
ACFLL8_05810		1337266	1338150	+	295	carbohydrate ABC transporter permease	70.9337	0.189571	0.329631	0	1	1	70.9337	-0.448589	0.344783	0	1	1	FALSE
ACFLL8_05815		1338240	1339487	+	416	ABC transporter ATP-binding protein	157.145	0.0304847	0.25781	0	1	1	157.145	0.393442	0.25792	0	1	1	FALSE
ACFLL8_05820		1339514	1340224	+	237	HAD family hydrolase	106.664	0.943323	0.300058	0	1	1	106.664	1.05252	0.302383	0.173677	0.862119	1	FALSE
ACFLL8_05825		1340251	1341093	+	281	L-iditol 2-dehydrogenase	144.968	0.749929	0.309909	0	1	1	144.968	0.254171	0.315865	0	1	1	FALSE
ACFLL8_05830		1341154	1341855	+	234	nucleoside/nucleotide kinase family protein	1041.36	-0.392462	0.203421	0	1	1	1041.36	1.27047	0.201256	1.34389	0.178983	1	FALSE
ACFLL8_05835	xylB	1341880	1343397	+	506	xylulokinase	1406.89	-0.728115	0.223495	0	1	1	1406.89	1.056	0.221782	0.252486	0.800665	1	FALSE
ACFLL8_05840	mgrA	1343586	1344614	-	343	L-glyceraldehyde 3-phosphate reductase	1121.35	-1.13428	0.258584	-0.519273	0.60357	1	1121.35	0.43302	0.256894	0	1	1	FALSE
ACFLL8_05845		1344807	1345712	+	302	LysR family transcriptional regulator	85.1491	0.0481123	0.294433	0	1	1	85.1491	0.0244416	0.2997	0	1	1	FALSE
ACFLL8_05850		1345836	1346243	-	136	heme-binding protein	1797.49	2.89768	0.261556	7.25536	4.00589e-13	9.98164e-12	1797.49	0.262449	0.264288	0	1	1	FALSE
ACFLL8_05855	glcF	1346311	1347636	-	442	glycolate oxidase subunit GlcF	826.626	2.79996	0.275779	6.52683	6.7174e-11	1.36406e-09	826.626	0.214274	0.281234	0	1	1	FALSE
ACFLL8_05860	glcE	1347665	1348867	-	401	glycolate oxidase subunit GlcE	319.384	-0.264103	0.25908	0	1	1	319.384	0.330976	0.25819	0	1	1	FALSE
ACFLL8_05865	glcD	1349016	1350515	-	500	glycolate oxidase subunit GlcD	554.789	-0.814359	0.292141	0	1	1	554.789	0.112767	0.290851	0	1	1	FALSE
ACFLL8_05870	glcC	1350876	1351691	+	272	transcriptional regulator GlcC	252.067	-0.222348	0.215252	0	1	1	252.067	-0.127892	0.217061	0	1	1	FALSE
ACFLL8_05875		1351841	1352425	+	195	YqaA family protein	286.887	0.1746	0.243842	0	1	1	286.887	-0.166087	0.247291	0	1	1	FALSE
ACFLL8_05880		1352402	1353838	-	479	D-serine ammonia-lyase	475.027	-0.663909	0.180434	0	1	1	475.027	-0.220447	0.180141	0	1	1	FALSE
ACFLL8_05885		1354493	1354912	-	140	CBS domain-containing protein	3937.17	-2.72262	0.262758	-6.55592	5.53006e-11	1.12948e-09	3937.17	-0.196271	0.261342	0	1	1	FALSE
ACFLL8_05890		1355125	1356609	-	495	dihydrolipoyl dehydrogenase	268.782	-0.925584	0.211232	0	1	1	268.782	0.178831	0.206212	0	1	1	FALSE
ACFLL8_05895		1356724	1357473	-	250	glutathione peroxidase	74.3997	-0.311806	0.314238	0	1	1	74.3997	-0.182314	0.317972	0	1	1	FALSE
ACFLL8_05900		1357809	1358069	+	87	hypothetical protein	2550.47	-1.114	0.351092	-0.324708	0.745402	1	2550.47	0.0269422	0.350743	0	1	1	FALSE
ACFLL8_05905		1358152	1358313	+	54	YqaE/Pmp3 family membrane protein	1573.12	-0.50843	0.404501	0	1	1	1573.12	-0.0707885	0.404466	0	1	1	FALSE
ACFLL8_05910		1358750	1359889	+	380	ABC transporter ATP-binding protein	12312.9	-0.966107	0.389837	0	1	1	12312.9	-0.813112	0.389857	0	1	1	FALSE
ACFLL8_05915		1359990	1361147	+	386	extracellular solute-binding protein	16840.2	-1.8763	0.561147	-1.56163	0.118375	0.46464	16840.2	-1.02176	0.56112	-0.0387833	0.969063	1	FALSE
ACFLL8_05920		1361306	1362607	+	434	ABC transporter permease	4004.2	-2.04436	0.95065	-1.09858	0.271952	0.928297	4004.2	-1.32735	0.950598	-0.344361	0.730575	1	FALSE
ACFLL8_05925		1362611	1363462	+	284	ABC transporter permease	3880.94	-1.80474	0.9809	-0.820413	0.411981	1	3880.94	-1.01724	0.980843	-0.017573	0.98598	1	FALSE
ACFLL8_05930		1363625	1365649	-	675	sigma-54-dependent Fis family transcriptional regulator	786.637	0.353102	0.294202	0	1	1	786.637	-0.0412264	0.295295	0	1	1	FALSE
ACFLL8_05935		1366052	1367218	+	389	ABC transporter ATP-binding protein	1399.91	4.79914	0.256118	14.8335	8.89155e-50	2.23114e-47	1399.91	-0.01289	0.270651	0	1	1	FALSE
ACFLL8_05940		1367218	1368432	+	405	ABC transporter ATP-binding protein	562.175	3.62399	0.249632	10.5114	7.65202e-26	6.10945e-24	562.175	0.0740141	0.26575	0	1	1	FALSE
ACFLL8_05945		1368432	1369301	+	290	carbohydrate ABC transporter permease	508.253	3.09685	0.252933	8.29013	1.13121e-16	3.97393e-15	508.253	-0.408069	0.270469	0	1	1	FALSE
ACFLL8_05950		1369313	1370113	+	267	carbohydrate ABC transporter permease	305.931	2.2567	0.234658	5.35545	8.53432e-08	1.17573e-06	305.931	-0.58521	0.255698	0	1	1	FALSE
ACFLL8_05955		1370187	1370459	+	91	DUF2160 domain-containing protein	65.9218	1.49752	0.315197	1.57845	0.114462	0.452816	65.9218	-0.651719	0.362483	0	1	1	FALSE
ACFLL8_05960		1370671	1372707	+	679	DUF4955 domain-containing protein	1576.68	0.936577	0.196518	0	1	1	1576.68	0.378068	0.19743	0	1	1	FALSE
ACFLL8_05965		1373025	1374677	+	551	ABC transporter substrate-binding protein	1497.49	1.36102	0.209279	1.72505	0.084518	0.34808	1497.49	0.392148	0.210593	0	1	1	FALSE
ACFLL8_05970	gcvP	1374848	1377742	-	965	aminomethyl-transferring glycine dehydrogenase	1116.76	-1.77782	0.1958	-3.97251	7.11207e-05	0.00061387	1116.76	0.101822	0.192385	0	1	1	FALSE
ACFLL8_05975	gcvH	1377951	1378343	-	131	glycine cleavage system protein GcvH	6220.87	0.655533	0.285469	0	1	1	6220.87	0.891189	0.285492	0	1	1	FALSE
ACFLL8_05980		1379221	1380582	+	454	alanine/glycine:cation symporter family protein	701.551	0.82152	0.381686	0	1	1	701.551	0.302824	0.382711	0	1	1	FALSE
ACFLL8_05985	gcvT	1380728	1381861	+	378	glycine cleavage system aminomethyltransferase GcvT	807.003	0.317917	0.266648	0	1	1	807.003	0.916237	0.266337	0	1	1	FALSE
ACFLL8_05990		1382153	1382359	-	69	cold-shock protein	32789	2.51935	0.282077	5.38627	7.19341e-08	1.01294e-06	32789	0.500813	0.28217	0	1	1	FALSE
ACFLL8_05995		1382944	1383606	-	221	3-oxoacid CoA-transferase subunit B	2320.96	-3.02507	0.285027	-7.10486	1.20447e-12	2.91814e-11	2320.96	0.758274	0.280566	0	1	1	FALSE
ACFLL8_06000		1383699	1384400	-	234	CoA transferase subunit A	2059.12	-2.70023	0.377577	-4.50299	6.70037e-06	7.00547e-05	2059.12	0.843517	0.374473	0	1	1	FALSE
ACFLL8_06005		1384828	1385751	+	308	LysR family transcriptional regulator	202.32	-0.95201	0.260687	0	1	1	202.32	-0.292127	0.258529	0	1	1	FALSE
ACFLL8_06010		1385743	1386504	-	254	alpha-ketoglutarate-dependent dioxygenase AlkB	416.779	-1.05402	0.198304	-0.272429	0.785292	1	416.779	-0.114345	0.195533	0	1	1	FALSE
ACFLL8_06015		1386580	1387131	-	184	phosphatase PAP2 family protein	208.198	-1.33103	0.292953	-1.12996	0.258493	0.891382	208.198	0.189791	0.284758	0	1	1	FALSE
ACFLL8_06020		1387103	1388260	-	386	glycosyltransferase family 4 protein	752.303	-0.68917	0.194631	0	1	1	752.303	0.0764759	0.193646	0	1	1	FALSE
ACFLL8_06025		1388599	1389549	-	317	LysM peptidoglycan-binding domain-containing protein	493.65	-0.06099	0.212864	0	1	1	493.65	-0.0111971	0.213911	0	1	1	FALSE
ACFLL8_06030		1389536	1390438	-	301	acyltransferase	430.106	1.0277	0.190936	0.145079	0.884648	1	430.106	-0.0128399	0.196522	0	1	1	FALSE
ACFLL8_06035	nhaD	1390713	1392020	+	436	sodium:proton antiporter NhaD	2149.25	0.0528891	0.162906	0	1	1	2149.25	0.270402	0.163052	0	1	1	FALSE
ACFLL8_06040		1392384	1393154	-	257	DUF1338 family protein	1775.75	-0.85721	0.25487	0	1	1	1775.75	-0.736863	0.255106	0	1	1	FALSE
ACFLL8_06045		1393304	1394170	+	289	DMT family transporter	680.459	1.32838	0.193497	1.69707	0.0896841	0.365076	680.459	0.0152562	0.197743	0	1	1	FALSE
ACFLL8_06050		1394263	1396017	-	585	monovalent cation:proton antiporter-2 %28CPA2%29 family protein	305.498	0.63018	0.290274	0	1	1	305.498	-0.0021995	0.293939	0	1	1	FALSE
ACFLL8_06055		1396292	1396558	-	89	GrxA family glutaredoxin	6130.31	2.42133	0.33145	4.28822	1.80112e-05	0.00017724	6130.31	-0.756673	0.332417	0	1	1	FALSE
ACFLL8_06065		1397958	1398866	+	303	LysR substrate-binding domain-containing protein	420.253	-2.11836	0.278835	-4.01082	6.05088e-05	0.00052878	420.253	-1.1893	0.276049	-0.685732	0.492882	1	FALSE
ACFLL8_06070		1399015	1399851	+	279	alpha/beta fold hydrolase	545.159	-0.545892	0.261897	0	1	1	545.159	-0.58611	0.26303	0	1	1	FALSE
ACFLL8_06075		1399893	1401158	+	422	MFS transporter	453.764	-1.32764	0.256536	-1.27716	0.201544	0.730676	453.764	-0.509241	0.254846	0	1	1	FALSE
ACFLL8_06080		1401275	1402462	-	396	ABC transporter substrate-binding protein	528.343	1.24694	0.228676	1.07989	0.280191	0.949413	528.343	-0.296478	0.234338	0	1	1	FALSE
ACFLL8_06085		1402528	1403295	-	256	ABC transporter permease	122.09	1.1724	0.340046	0.506988	0.612163	1	122.09	-0.124205	0.353526	0	1	1	FALSE
ACFLL8_06090		1403292	1404044	-	251	ABC transporter ATP-binding protein	281.677	1.03494	0.294522	0.118633	0.905566	1	281.677	-0.521715	0.303154	0	1	1	FALSE
ACFLL8_06095		1404345	1405304	+	320	hypothetical protein	739.363	-0.62319	0.192212	0	1	1	739.363	-0.405471	0.192639	0	1	1	FALSE
ACFLL8_06100		1405426	1407135	+	570	potassium/proton antiporter	1589.17	-0.416992	0.186189	0	1	1	1589.17	-0.172081	0.186349	0	1	1	FALSE
ACFLL8_06105		1407334	1408464	+	377	GGDEF domain-containing protein	1296.29	-1.97745	0.292675	-3.3397	0.00083868	0.00584581	1296.29	-1.14401	0.291995	-0.493208	0.621866	1	FALSE
ACFLL8_06110		1408539	1409750	-	404	DEAD/DEAH box helicase	630.847	-0.668171	0.232725	0	1	1	630.847	-0.691186	0.233818	0	1	1	FALSE
ACFLL8_06125		1410556	1411224	+	223	Bax inhibitor-1/YccA family protein	4878.28	1.71612	0.242112	2.95779	0.00309852	0.0196482	4878.28	-0.0543003	0.242766	0	1	1	FALSE
ACFLL8_06130	tusD	1411422	1411811	+	130	sulfurtransferase complex subunit TusD	137.693	1.72031	0.301428	2.38965	0.0168643	0.0892234	137.693	-0.248656	0.322309	0	1	1	FALSE
ACFLL8_06135	tusC	1411822	1412250	+	143	sulfurtransferase complex subunit TusC	378.95	1.29575	0.213147	1.38754	0.165278	0.613767	378.95	0.466643	0.217594	0	1	1	FALSE
ACFLL8_06140	tusB	1412411	1412701	+	97	sulfurtransferase complex subunit TusB	157.461	0.550084	0.289544	0	1	1	157.461	0.0241063	0.295858	0	1	1	FALSE
ACFLL8_06145		1412780	1413133	+	118	TusE/DsrC/DsvC family sulfur relay protein	137.039	-0.0896278	0.254759	0	1	1	137.039	-0.0180649	0.257706	0	1	1	FALSE
ACFLL8_06150		1413344	1414072	+	243	YebC/PmpR family DNA-binding transcriptional regulator	4727.49	1.72203	0.223206	3.23481	0.00121724	0.00822341	4727.49	0.0977724	0.223858	0	1	1	FALSE
ACFLL8_06155		1414279	1414965	-	229	DUF4396 domain-containing protein	388.381	-3.06533	0.321407	-6.42591	1.31087e-10	2.53026e-09	388.381	-0.321987	0.306439	0	1	1	FALSE
ACFLL8_06160		1415278	1415907	+	210	ATP-dependent zinc protease	1600.37	-0.466946	0.212755	0	1	1	1600.37	-0.272052	0.212951	0	1	1	FALSE
ACFLL8_06165		1415984	1416367	+	128	thiol-disulfide oxidoreductase DCC family protein	347.687	-1.61577	0.246295	-2.50013	0.0124148	0.0676173	347.687	-0.0790475	0.239873	0	1	1	FALSE
ACFLL8_06170	fhuF	1416497	1417363	+	289	siderophore-iron reductase FhuF	344.883	-1.67156	0.35161	-1.90996	0.0561386	0.247915	344.883	-0.218231	0.347345	0	1	1	FALSE
ACFLL8_06175	rlmF	1417615	1418805	+	397	23S rRNA %28adenine%281618%29-N%286%29%29-methyltransferase RlmF	156.808	-0.0049349	0.267194	0	1	1	156.808	-0.63078	0.275997	0	1	1	FALSE
ACFLL8_06180		1419059	1420030	+	324	glycosyltransferase family 2 protein	208.869	-3.57775	1.11825	-2.30517	0.0211571	0.107445	208.869	-1.41133	1.11073	-0.370321	0.711143	1	FALSE
ACFLL8_06185		1420030	1420503	+	158	lipid-A-disaccharide synthase N-terminal domain-containing protein	103.643	-3.39217	1.01578	-2.35502	0.0185219	0.0963453	103.643	-1.30434	1.001	-0.304036	0.761101	1	FALSE
ACFLL8_06190		1420500	1422293	+	598	ArnT family glycosyltransferase	495.416	-3.86579	1.00584	-2.84915	0.00438368	0.0267824	495.416	-1.66812	1.00174	-0.666965	0.504794	1	FALSE
ACFLL8_06195		1422290	1424245	+	652	ArnT family glycosyltransferase	474.808	-3.30191	1.09106	-2.10979	0.0348763	0.166694	474.808	-1.72527	1.08893	-0.666044	0.505383	1	FALSE
ACFLL8_06200		1424242	1425417	+	392	NAD-dependent epimerase/dehydratase family protein	386.632	-2.91701	1.04788	-1.82941	0.0673376	0.286042	386.632	-2.04358	1.04682	-0.996902	0.318812	1	FALSE
ACFLL8_06205		1425489	1426652	-	388	NADH:flavin oxidoreductase	587.422	-0.506272	0.482938	0	1	1	587.422	-1.17361	0.484546	-0.358284	0.720131	1	FALSE
ACFLL8_06210		1427084	1427524	-	147	hypothetical protein	1067.95	-1.05919	0.296571	-0.199596	0.841796	1	1067.95	-0.625313	0.296494	0	1	1	FALSE
ACFLL8_06215		1427843	1428274	+	144	OsmC family protein	17878.9	-0.64822	0.350672	0	1	1	17878.9	-0.140175	0.350665	0	1	1	FALSE
ACFLL8_06220		1428449	1429471	-	341	YihY/virulence factor BrkB family protein	266.39	-0.0196999	0.205883	0	1	1	266.39	-0.0751135	0.208537	0	1	1	FALSE
ACFLL8_06225	rarD	1429509	1430489	-	327	EamA family transporter RarD	305.832	0.0634514	0.207911	0	1	1	305.832	-0.161104	0.211111	0	1	1	FALSE
ACFLL8_06230		1430486	1430839	-	118	DUF1904 family protein	279.406	-0.88116	0.244793	0	1	1	279.406	-0.3802	0.244068	0	1	1	FALSE
ACFLL8_06235		1431244	1432137	+	298	nitrilase family protein	2993.22	0.987877	0.20062	0	1	1	2993.22	-0.0687305	0.201412	0	1	1	FALSE
ACFLL8_06240		1432137	1432838	+	234	pseudouridine synthase	661.553	1.09207	0.219524	0.419406	0.674919	1	661.553	-0.162291	0.223338	0	1	1	FALSE
ACFLL8_06245		1433145	1434134	+	330	ABC transporter substrate-binding protein	2688.57	-1.25233	0.264949	-0.952358	0.340915	1	2688.57	-2.23773	0.266156	-4.65039	3.31313e-06	0.00046556	FALSE
ACFLL8_06250		1434454	1435776	+	441	dicarboxylate/amino acid:cation symporter	53.1362	0.179709	0.318401	0	1	1	53.1362	-0.008247	0.329217	0	1	1	FALSE
ACFLL8_06255		1435913	1437463	+	517	amino acid racemase	126.035	0.178544	0.238199	0	1	1	126.035	0.376899	0.240066	0	1	1	FALSE
ACFLL8_06260		1437683	1438606	+	308	LysR substrate-binding domain-containing protein	186.138	-1.20866	0.288079	-0.724318	0.468871	1	186.138	-0.161511	0.282779	0	1	1	FALSE
ACFLL8_06265		1438711	1439064	-	118	hypothetical protein	1873.97	2.42878	0.182437	7.83162	4.81611e-15	1.48412e-13	1873.97	0.639701	0.184548	0	1	1	FALSE
ACFLL8_06270		1439664	1440203	+	180	IS30 family transposase	902.026	0.00185314	0.200726	0	1	1	902.026	0.307186	0.200853	0	1	1	FALSE
ACFLL8_06275		1440476	1443007	+	844	hypothetical protein	3005.27	0.622401	0.22357	0	1	1	3005.27	-0.049457	0.224081	0	1	1	FALSE
ACFLL8_06280		1443019	1444734	+	572	hypothetical protein	1679.86	-0.173589	0.191822	0	1	1	1679.86	0.229932	0.191794	0	1	1	FALSE
ACFLL8_06285		1444999	1447389	+	797	DNA/RNA helicase domain-containing protein	2156.48	0.155132	0.242139	0	1	1	2156.48	0.703027	0.242037	0	1	1	FALSE
ACFLL8_06290		1447461	1448525	+	355	MrcB family domain-containing protein	2078.77	0.358003	0.254348	0	1	1	2078.77	0.521093	0.254471	0	1	1	FALSE
ACFLL8_06295		1449059	1449415	+	119	nucleotide pyrophosphohydrolase	473.411	1.18197	0.189409	0.960702	0.336702	1	473.411	-0.117584	0.195681	0	1	1	FALSE
ACFLL8_06300		1449636	1450310	+	225	type IV toxin-antitoxin system AbiEi family antitoxin domain-containing protein	1773.37	0.0928311	0.241262	0	1	1	1773.37	0.627282	0.241146	0	1	1	FALSE
ACFLL8_06305		1450300	1451195	+	298.667	nucleotidyl transferase AbiEii/AbiGii toxin family protein	1199.61	-0.302099	0.189362	0	1	1	1199.61	0.501359	0.188728	0	1	1	FALSE
ACFLL8_06310		1451554	1453338	+	595	P-loop NTPase fold protein	3777.39	1.03737	0.210297	0.177716	0.858946	1	3777.39	0.340131	0.21071	0	1	1	FALSE
ACFLL8_06315		1453569	1454090	+	174	hypothetical protein	934.111	-0.364237	0.222852	0	1	1	934.111	0.145666	0.22263	0	1	1	FALSE
ACFLL8_06320	qatC	1454087	1455391	+	435	Qat anti-phage system QueC-like protein QatC	1784.5	0.114949	0.206932	0	1	1	1784.5	0.175655	0.207209	0	1	1	FALSE
ACFLL8_06325	qatD	1455400	1456125	+	242	Qat anti-phage system TatD family nuclease QatD	2009.17	0.141432	0.212147	0	1	1	2009.17	0.387065	0.212244	0	1	1	FALSE
ACFLL8_06330		1456503	1456850	+	116	hypothetical protein	793.402	-0.90145	0.216554	0	1	1	793.402	-0.0778141	0.215537	0	1	1	FALSE
ACFLL8_06335		1457190	1457717	-	176	flavin reductase family protein	341.742	0.542931	0.233617	0	1	1	341.742	0.193417	0.236454	0	1	1	FALSE
ACFLL8_06340		1458214	1459110	+	299	LysR family transcriptional regulator	243.999	1.42331	0.211619	2.00033	0.0454645	0.208508	243.999	0.187234	0.221484	0	1	1	FALSE
ACFLL8_06345		1459112	1460617	-	502	AbgT family transporter	350.89	-0.903094	0.282365	0	1	1	350.89	-0.113937	0.280733	0	1	1	FALSE
ACFLL8_06350		1460655	1461809	-	385	M20 family metallopeptidase	378.576	0.283512	0.241763	0	1	1	378.576	-0.237748	0.245089	0	1	1	FALSE
ACFLL8_06355		1462034	1462549	+	172	hypothetical protein	5931.8	1.70599	0.277122	2.54759	0.010847	0.0601982	5931.8	-0.295333	0.277682	0	1	1	FALSE
ACFLL8_06360		1462727	1463242	-	172	flavin reductase family protein	1116.33	-1.30886	0.25158	-1.2277	0.21956	0.778318	1116.33	-1.28155	0.252198	-1.11637	0.264262	1	FALSE
ACFLL8_06365		1463500	1464534	-	345	methionine synthase	11579.3	-1.15851	0.19326	-0.82019	0.412108	1	11579.3	-0.828316	0.193269	0	1	1	FALSE
ACFLL8_06370		1464630	1465619	-	330	DUF1852 domain-containing protein	45739	1.12893	0.232944	0.553466	0.579945	1	45739	-0.542749	0.233018	0	1	1	FALSE
ACFLL8_06375		1466161	1468212	-	684	sigma-54-dependent Fis family transcriptional regulator	575.955	-0.72045	0.182767	0	1	1	575.955	0.190433	0.180881	0	1	1	FALSE
ACFLL8_06380		1468634	1470430	+	599	NAD%28P%29-binding domain-containing protein	279.263	0.690381	0.226545	0	1	1	279.263	0.0727433	0.231512	0	1	1	FALSE
ACFLL8_06385		1470515	1471291	+	259	SDR family NAD%28P%29-dependent oxidoreductase	100.381	-1.30351	0.322416	-0.941363	0.346519	1	100.381	-0.0658585	0.310832	0	1	1	FALSE
ACFLL8_06390		1471482	1471940	-	153	META domain-containing protein	152.361	-0.22658	0.314527	0	1	1	152.361	0.10643	0.314837	0	1	1	FALSE
ACFLL8_06395		1472140	1473135	+	332	ion transporter	715.054	-0.946732	0.276506	0	1	1	715.054	0.163424	0.275055	0	1	1	FALSE
ACFLL8_06400	egtB	1473279	1474598	+	440	ergothioneine biosynthesis protein EgtB	906.478	-0.469182	0.27311	0	1	1	906.478	0.223045	0.272661	0	1	1	FALSE
ACFLL8_06405		1474690	1475031	+	114	DUF427 domain-containing protein	273.685	-1.22294	0.247302	-0.901507	0.367319	1	273.685	0.188467	0.240826	0	1	1	FALSE
ACFLL8_06410		1475383	1476057	+	225	NERD domain-containing protein	314.444	0.119828	0.245668	0	1	1	314.444	-0.224587	0.248854	0	1	1	FALSE
ACFLL8_06415		1476494	1479106	-	871	hypothetical protein	1090.17	-0.852255	0.165916	0	1	1	1090.17	-0.176009	0.16527	0	1	1	FALSE
ACFLL8_06420		1479103	1481700	-	866	hypothetical protein	1262.34	-0.304519	0.18127	0	1	1	1262.34	-0.268138	0.181804	0	1	1	FALSE
ACFLL8_06425		1481727	1482551	-	275	hypothetical protein	416.615	-0.478091	0.211726	0	1	1	416.615	-0.0265056	0.211422	0	1	1	FALSE
ACFLL8_06430		1482916	1483863	-	316	site-specific integrase	207.056	-0.629894	0.246183	0	1	1	207.056	0.601992	0.240054	0	1	1	FALSE
ACFLL8_06435		1484196	1485761	-	522	DEAD/DEAH box helicase	212.853	-0.480621	0.26944	0	1	1	212.853	0.155514	0.267836	0	1	1	FALSE
ACFLL8_06440		1485758	1486303	-	182	hypothetical protein	87.7067	0.111221	0.293415	0	1	1	87.7067	0.214858	0.296822	0	1	1	FALSE
ACFLL8_06445		1487168	1487887	-	240	FAD-dependent oxidoreductase	387.835	-1.38243	0.261638	-1.46166	0.143835	0.545743	387.835	0.336161	0.255772	0	1	1	FALSE
ACFLL8_06450		1487989	1488348	-	120	hypothetical protein	150.871	-0.972894	0.251635	0	1	1	150.871	0.0534612	0.244829	0	1	1	FALSE
ACFLL8_06455		1488394	1496982	-	2863	GH36-type glycosyl hydrolase domain-containing protein	1395.45	-0.819057	0.172255	0	1	1	1395.45	-0.0014103	0.171553	0	1	1	FALSE
ACFLL8_06460		1497151	1497909	-	253	Crp/Fnr family transcriptional regulator	635.543	-1.98881	0.188871	-5.23535	1.64675e-07	2.18304e-06	635.543	-0.642282	0.184504	0	1	1	FALSE
ACFLL8_06465		1498083	1499081	-	333	helix-turn-helix domain-containing protein	777.608	-1.88216	0.2052	-4.29903	1.7155e-05	0.00016981	777.608	-0.549966	0.202093	0	1	1	FALSE
ACFLL8_06470		1499307	1500446	+	380	phosphotransferase enzyme family protein	8694.13	-1.91987	1.31562	-0.699192	0.484432	1	8694.13	2.90177	1.31523	1.44596	0.148189	1	FALSE
ACFLL8_06475		1500446	1501780	+	445	aspartate aminotransferase family protein	8228.58	-2.1972	1.10044	-1.08793	0.276628	0.939838	8228.58	2.58638	1.09995	1.44223	0.149236	1	FALSE
ACFLL8_06480		1501971	1502963	-	331	nucleoid-associated protein	1914.43	-0.309794	0.239387	0	1	1	1914.43	1.95376	0.237799	4.01079	6.05151e-05	0.00625263	FALSE
ACFLL8_06485		1503294	1503992	-	233	response regulator	851.849	0.217675	0.201964	0	1	1	851.849	-0.067437	0.203239	0	1	1	FALSE
ACFLL8_06490		1503982	1506696	-	905	sensor histidine kinase KdpD	2138.59	0.268692	0.216665	0	1	1	2138.59	-0.187442	0.217273	0	1	1	FALSE
ACFLL8_06495	kdpC	1506671	1507288	-	206	potassium-transporting ATPase subunit KdpC	754.286	1.51397	0.199835	2.57195	0.0101127	0.0563906	754.286	0.099459	0.20377	0	1	1	FALSE
ACFLL8_06500	kdpB	1507299	1509338	-	680	potassium-transporting ATPase subunit KdpB	651.516	-0.227396	0.259574	0	1	1	651.516	0.0544237	0.259765	0	1	1	FALSE
ACFLL8_06505	kdpA	1509352	1511070	-	573	potassium-transporting ATPase subunit KdpA	726.989	-0.636715	0.268152	0	1	1	726.989	-0.211168	0.268057	0	1	1	FALSE
ACFLL8_06510	kdpF	1511081	1511161	-	27	K%28%2B%29-transporting ATPase subunit F	6.88898	0.0788655	0.721331	0	1	1	6.88898	-0.708711	0.805447	0	1	1	FALSE
ACFLL8_06515		1511618	1512559	-	314	LysR family transcriptional regulator	601.237	1.88731	0.237573	3.73491	0.00018779	0.00146925	601.237	-0.540646	0.246027	0	1	1	FALSE
ACFLL8_06520	rhmD	1512804	1513988	+	395	L-rhamnonate dehydratase	334.309	1.02987	0.211061	0.141503	0.887473	1	334.309	0.80109	0.213489	0	1	1	FALSE
ACFLL8_06525		1514023	1514349	+	109	L-rhamnose mutarotase	41.4516	0.41062	0.346989	0	1	1	41.4516	0.436338	0.354387	0	1	1	FALSE
ACFLL8_06530		1514349	1515239	+	297	amidohydrolase family protein	344.535	0.584736	0.197908	0	1	1	344.535	0.209201	0.201328	0	1	1	FALSE
ACFLL8_06535		1515309	1516079	+	257	SDR family NAD%28P%29-dependent oxidoreductase	1357.87	0.15591	0.2328	0	1	1	1357.87	0.251214	0.233085	0	1	1	FALSE
ACFLL8_06540		1516115	1516915	+	267	HpcH/HpaI aldolase/citrate lyase family protein	415.672	0.357516	0.260426	0	1	1	415.672	0.21014	0.261953	0	1	1	FALSE
ACFLL8_06545	aldA	1516957	1518396	+	480	aldehyde dehydrogenase	595.836	0.595187	0.223259	0	1	1	595.836	0.209587	0.225044	0	1	1	FALSE
ACFLL8_06550		1518454	1519983	+	510	purine-cytosine permease family protein	1669.61	-0.0963706	0.21395	0	1	1	1669.61	0.347933	0.213888	0	1	1	FALSE
ACFLL8_06555	kdgD	1520678	1521592	+	305	5-dehydro-4-deoxyglucarate dehydratase	293.241	0.525423	0.338824	0	1	1	293.241	-0.111911	0.342191	0	1	1	FALSE
ACFLL8_06560		1521640	1523217	+	526	aldehyde dehydrogenase %28NADP%28%2B%29%29	532.465	0.281725	0.196068	0	1	1	532.465	-0.0548086	0.198314	0	1	1	FALSE
ACFLL8_06565		1523773	1524780	+	336	TRAP transporter substrate-binding protein	445.418	1.53054	0.33866	1.5666	0.117209	0.461092	445.418	-0.332792	0.34426	0	1	1	FALSE
ACFLL8_06570		1524840	1525400	+	187	TRAP transporter small permease	175.067	-0.343389	0.330295	0	1	1	175.067	-0.546562	0.334057	0	1	1	FALSE
ACFLL8_06575		1525403	1526683	+	427	TRAP transporter large permease	567.876	-0.58931	0.398409	0	1	1	567.876	-0.542165	0.398974	0	1	1	FALSE
ACFLL8_06580		1526727	1527863	+	379	mandelate racemase/muconate lactonizing enzyme family protein	447.261	-0.682264	0.270032	0	1	1	447.261	0.185458	0.268534	0	1	1	FALSE
ACFLL8_06585		1527945	1528745	+	267	amidohydrolase family protein	161.811	0.145881	0.324974	0	1	1	161.811	-0.245236	0.329956	0	1	1	FALSE
ACFLL8_06590		1528826	1529623	+	266	NAD-dependent epimerase/dehydratase family protein	519.277	0.111814	0.265313	0	1	1	519.277	-0.744434	0.268717	0	1	1	FALSE
ACFLL8_06595		1529665	1530687	+	341	Ldh family oxidoreductase	308.305	-0.811185	0.196344	0	1	1	308.305	-0.674088	0.197959	0	1	1	FALSE
ACFLL8_06600		1531093	1531818	+	242	FadR/GntR family transcriptional regulator	1951.35	0.452146	0.181347	0	1	1	1951.35	-0.733422	0.18303	0	1	1	FALSE
ACFLL8_06605		1532022	1533077	-	352	LacI family DNA-binding transcriptional regulator	668.936	-0.987406	0.219344	0	1	1	668.936	-0.877185	0.220134	0	1	1	FALSE
ACFLL8_06610		1533223	1534941	-	573	alpha-amylase family glycosyl hydrolase	566.519	-1.16293	0.192408	-0.846794	0.39711	1	566.519	-0.599814	0.191667	0	1	1	FALSE
ACFLL8_06615		1535078	1536349	-	424	ABC transporter substrate-binding protein	275.129	-0.494524	0.218864	0	1	1	275.129	0.165645	0.217193	0	1	1	FALSE
ACFLL8_06620		1536475	1538139	-	555	alpha-amylase family glycosyl hydrolase	146.343	-0.626112	0.284805	0	1	1	146.343	0.214666	0.280752	0	1	1	FALSE
ACFLL8_06625		1538181	1539830	-	550	alpha-glucosidase family protein	264.84	-0.429943	0.209313	0	1	1	264.84	0.114756	0.208248	0	1	1	FALSE
ACFLL8_06630		1539982	1541088	-	369	ABC transporter ATP-binding protein	381.424	-0.663187	0.239018	0	1	1	381.424	0.794057	0.234634	0	1	1	FALSE
ACFLL8_06635		1541134	1542774	-	547	alpha-glucosidase family protein	123.649	-0.716234	0.25351	0	1	1	123.649	-0.187751	0.25168	0	1	1	FALSE
ACFLL8_06640		1542801	1543643	-	281	carbohydrate ABC transporter permease	77.5263	0.244275	0.292273	0	1	1	77.5263	0.232809	0.297662	0	1	1	FALSE
ACFLL8_06645		1543655	1544629	-	325	carbohydrate ABC transporter permease	74.5426	-0.457635	0.285786	0	1	1	74.5426	0.12511	0.282381	0	1	1	FALSE
ACFLL8_06650		1544645	1545913	-	423	ABC transporter substrate-binding protein	153.113	0.18774	0.270882	0	1	1	153.113	0.723355	0.269703	0	1	1	FALSE
ACFLL8_06655		1546287	1547828	+	514	carbohydrate porin	310.267	1.35908	0.231184	1.55324	0.120366	0.471926	310.267	0.373915	0.236959	0	1	1	FALSE
ACFLL8_06660		1548468	1548662	+	65	CsbD family protein	2036.49	2.3743	0.580591	2.36708	0.0179292	0.0935889	2036.49	-0.545129	0.581985	0	1	1	FALSE
ACFLL8_06665		1549338	1550369	+	344	LacI family DNA-binding transcriptional regulator	843.495	0.422747	0.220016	0	1	1	843.495	-0.189614	0.221806	0	1	1	FALSE
ACFLL8_06670		1550707	1551933	+	409	Gfo/Idh/MocA family protein	124.667	0.82648	0.239275	0	1	1	124.667	0.133824	0.250334	0	1	1	FALSE
ACFLL8_06675	araD	1552064	1553791	+	576	L-arabinonate dehydratase	116.288	1.23543	0.273453	0.860944	0.389269	1	116.288	0.636553	0.282241	0	1	1	FALSE
ACFLL8_06680		1553899	1554855	+	319	SMP-30/gluconolactonase/LRE family protein	122.857	0.737787	0.26108	0	1	1	122.857	0.129133	0.27062	0	1	1	FALSE
ACFLL8_06685		1554916	1555698	+	261	HpcH/HpaI aldolase/citrate lyase family protein	59.7791	0.569757	0.329735	0	1	1	59.7791	0.0626229	0.343768	0	1	1	FALSE
ACFLL8_06690		1555754	1556518	+	255	SDR family NAD%28P%29-dependent oxidoreductase	109.209	1.05803	0.274834	0.211141	0.832777	1	109.209	-0.0256419	0.290425	0	1	1	FALSE
ACFLL8_06695	iolD	1556856	1558706	+	617	3D-%283%2C5/4%29-trihydroxycyclohexane-1%2C2-dione acylhydrolase %28decyclizing%29	302.291	0.722446	0.221509	0	1	1	302.291	0.402145	0.224635	0	1	1	FALSE
ACFLL8_06700		1558831	1560033	+	401	Gfo/Idh/MocA family protein	142.975	-0.257695	0.25484	0	1	1	142.975	0.152708	0.254528	0	1	1	FALSE
ACFLL8_06705		1560174	1561082	+	303	TIM barrel protein	210.634	-0.725507	0.28322	0	1	1	210.634	-0.350285	0.28323	0	1	1	FALSE
ACFLL8_06710		1561247	1562746	+	500	sugar porter family MFS transporter	562.1	0.736708	0.207055	0	1	1	562.1	0.416891	0.208853	0	1	1	FALSE
ACFLL8_06715		1562907	1563302	+	132	VOC family protein	1502.35	0.321411	0.223866	0	1	1	1502.35	0.634493	0.223923	0	1	1	FALSE
ACFLL8_06720		1563497	1564951	-	485	sugar porter family MFS transporter	2749.84	-0.845395	0.208678	0	1	1	2749.84	0.0251145	0.208347	0	1	1	FALSE
ACFLL8_06725		1565100	1565942	-	281	sugar phosphate isomerase/epimerase family protein	1086.44	-2.19687	0.246398	-4.85745	1.18905e-06	1.38775e-05	1086.44	-0.174197	0.242913	0	1	1	FALSE
ACFLL8_06730		1566043	1567545	-	501	CoA-acylating methylmalonate-semialdehyde dehydrogenase	767.935	-1.4287	0.244602	-1.75263	0.0796663	0.331597	767.935	-0.202192	0.242576	0	1	1	FALSE
ACFLL8_06735	iolE	1567635	1568540	-	302	myo-inosose-2 dehydratase	323.828	-1.17601	0.26905	-0.654184	0.512993	1	323.828	-0.560634	0.267865	0	1	1	FALSE
ACFLL8_06740	iolD	1568661	1570538	-	626	3D-%283%2C5/4%29-trihydroxycyclohexane-1%2C2-dione acylhydrolase %28decyclizing%29	1003.18	0.0677331	0.248278	0	1	1	1003.18	-0.229091	0.249209	0	1	1	FALSE
ACFLL8_06745	iolC	1570535	1572526	-	664	5-dehydro-2-deoxygluconokinase	1543.74	-0.491467	0.193784	0	1	1	1543.74	0.248121	0.193355	0	1	1	FALSE
ACFLL8_06750		1572642	1573424	-	261	ATP-binding cassette domain-containing protein	111.719	0.267567	0.306209	0	1	1	111.719	0.565703	0.306914	0	1	1	FALSE
ACFLL8_06755		1573535	1574653	-	373	ABC transporter permease	140.279	0.193923	0.250952	0	1	1	140.279	0.182136	0.254469	0	1	1	FALSE
ACFLL8_06760		1574731	1575723	-	331	sugar ABC transporter substrate-binding protein	328.042	0.499462	0.214211	0	1	1	328.042	0.618726	0.215303	0	1	1	FALSE
ACFLL8_06765		1576009	1576929	+	307	MurR/RpiR family transcriptional regulator	459.374	0.226734	0.197828	0	1	1	459.374	0.516473	0.198124	0	1	1	FALSE
ACFLL8_06770	iolG	1577037	1578032	+	332	inositol 2-dehydrogenase	557.541	-0.395908	0.230583	0	1	1	557.541	0.249346	0.229858	0	1	1	FALSE
ACFLL8_06775	iolB	1578068	1578871	+	268	5-deoxy-glucuronate isomerase	344.175	-0.56057	0.239421	0	1	1	344.175	0.169205	0.237881	0	1	1	FALSE
ACFLL8_06780		1578996	1580213	-	406	PotD/PotF family extracellular solute-binding protein	786.585	0.976187	0.189509	0	1	1	786.585	0.776737	0.190611	0	1	1	FALSE
ACFLL8_06785		1580206	1581249	-	348	CobW family GTP-binding protein	297.09	-0.414135	0.199954	0	1	1	297.09	0.0464885	0.199458	0	1	1	FALSE
ACFLL8_06790		1581295	1581597	-	101	hypothetical protein	80.2688	-1.02218	0.28826	-0.0769475	0.938665	1	80.2688	-0.0500949	0.277813	0	1	1	FALSE
ACFLL8_06795		1581629	1582978	-	450	amidase family protein	1226.36	-1.23937	0.172048	-1.39127	0.164143	0.610196	1226.36	-0.0367022	0.170389	0	1	1	FALSE
ACFLL8_06800		1583032	1584552	-	507	NCS1 family transporter	778.878	-0.229744	0.182932	0	1	1	778.878	0.194493	0.182818	0	1	1	FALSE
ACFLL8_06805		1584913	1585944	+	344	GntR family transcriptional regulator	1307.71	0.631256	0.262428	0	1	1	1307.71	-0.113731	0.26351	0	1	1	FALSE
ACFLL8_06810		1586477	1587358	+	294	polysaccharide deacetylase	112.277	0.454174	0.29422	0	1	1	112.277	0.106686	0.301126	0	1	1	FALSE
ACFLL8_06815		1587410	1588771	+	454	MFS transporter	206.304	0.420655	0.232824	0	1	1	206.304	0.545956	0.234404	0	1	1	FALSE
ACFLL8_06820		1588768	1589556	+	263	SDR family NAD%28P%29-dependent oxidoreductase	150.262	-0.0306712	0.258464	0	1	1	150.262	0.5133	0.257081	0	1	1	FALSE
ACFLL8_06825		1589618	1590358	+	247	SDR family NAD%28P%29-dependent oxidoreductase	220.883	0.474251	0.267163	0	1	1	220.883	0.306808	0.270006	0	1	1	FALSE
ACFLL8_06830		1590377	1591189	+	271	hypothetical protein	305.24	0.279035	0.2061	0	1	1	305.24	0.513621	0.206795	0	1	1	FALSE
ACFLL8_06835		1591325	1592581	-	419	ISL3 family transposase	187.976	1.1316	0.292958	0.449213	0.653278	1	187.976	-0.585413	0.307344	0	1	1	FALSE
ACFLL8_06840		1592674	1594296	-	541	BCCT family transporter	162.608	0.353947	0.229989	0	1	1	162.608	0.208766	0.234357	0	1	1	FALSE
ACFLL8_06845		1594610	1596220	-	537	BCCT family transporter	206.299	0.293256	0.294259	0	1	1	206.299	0.597364	0.294624	0	1	1	FALSE
ACFLL8_06850		1596432	1597313	-	294	LysR substrate-binding domain-containing protein	103.85	-0.534476	0.288313	0	1	1	103.85	0.0767751	0.285503	0	1	1	FALSE
ACFLL8_06855		1597446	1598351	+	302	phytanoyl-CoA dioxygenase family protein	79.4733	-0.879004	0.361421	0	1	1	79.4733	1.35477	0.333588	1.06349	0.287558	1	FALSE
ACFLL8_06860		1598438	1599694	+	419	Xaa-Pro peptidase family protein	118.02	-0.128319	0.269738	0	1	1	118.02	0.933019	0.26266	0	1	1	FALSE
ACFLL8_06865		1599948	1600862	+	305	LysR substrate-binding domain-containing protein	144.632	0.908006	0.254817	0	1	1	144.632	-0.206327	0.268259	0	1	1	FALSE
ACFLL8_06870		1601192	1602151	+	320	NAD%28P%29-dependent oxidoreductase	57.2166	-0.269064	0.370529	0	1	1	57.2166	0.473759	0.364709	0	1	1	FALSE
ACFLL8_06875		1602260	1603693	+	478	aldehyde dehydrogenase family protein	158.466	0.393115	0.269273	0	1	1	158.466	-0.0513761	0.275524	0	1	1	FALSE
ACFLL8_06880		1603982	1604740	-	253	IclR family transcriptional regulator	145.424	-0.177137	0.28992	0	1	1	145.424	0.596188	0.286818	0	1	1	FALSE
ACFLL8_06885		1604921	1606549	-	543	GMC family oxidoreductase	1207.77	-0.729488	0.162434	0	1	1	1207.77	-0.237798	0.16221	0	1	1	FALSE
ACFLL8_06890		1606555	1607790	-	412	mandelate racemase/muconate lactonizing enzyme family protein	232.923	-0.420089	0.222514	0	1	1	232.923	0.459269	0.21915	0	1	1	FALSE
ACFLL8_06895	aldA	1607963	1609387	-	475	aldehyde dehydrogenase	490.042	0.546481	0.195078	0	1	1	490.042	0.708832	0.195739	0	1	1	FALSE
ACFLL8_06900		1609452	1609613	-	54	hypothetical protein	20.858	0.11009	0.479503	0	1	1	20.858	0.87944	0.467249	0	1	1	FALSE
ACFLL8_06905		1609914	1612670	+	919	type VI secretion system Vgr family protein	428.356	0.850399	0.253363	0	1	1	428.356	-0.0928527	0.257366	0	1	1	FALSE
ACFLL8_06910		1612667	1615000	+	778	hypothetical protein	1468.2	2.41463	0.262161	5.39601	6.81379e-08	9.65195e-07	1468.2	0.273294	0.264601	0	1	1	FALSE
ACFLL8_06915		1615045	1615956	-	304	formylglycine-generating enzyme family protein	10134.5	0.954041	0.181913	0	1	1	10134.5	-0.354993	0.182239	0	1	1	FALSE
ACFLL8_06920		1616737	1617609	+	291	tetratricopeptide repeat protein	921.743	0.529888	0.186652	0	1	1	921.743	-0.570815	0.189784	0	1	1	FALSE
ACFLL8_06925		1617806	1618678	+	291	tetratricopeptide repeat protein	646.717	1.32491	0.246964	1.31562	0.188302	0.688351	646.717	-0.579383	0.252582	0	1	1	FALSE
ACFLL8_06930		1619566	1620045	+	160	copper resistance protein NlpE N-terminal domain-containing protein	633.298	1.73037	0.306409	2.38366	0.0171414	0.0902815	633.298	-0.403216	0.311587	0	1	1	FALSE
ACFLL8_06935		1620092	1620841	+	250	hypothetical protein	717.683	1.85588	0.250826	3.41227	0.00064424	0.00457217	717.683	-0.658694	0.258021	0	1	1	FALSE
ACFLL8_06940	tssB	1620935	1621462	+	176	type VI secretion system contractile sheath small subunit	320.649	-0.135548	0.368927	0	1	1	320.649	-1.04196	0.373398	-0.112369	0.910531	1	FALSE
ACFLL8_06945	tssC	1621478	1622977	+	500	type VI secretion system contractile sheath large subunit	741.923	-0.375161	0.32841	0	1	1	741.923	-0.920246	0.329951	0	1	1	FALSE
ACFLL8_06950	tssE	1623094	1623582	+	163	type VI secretion system baseplate subunit TssE	100.632	0.0806073	0.29099	0	1	1	100.632	-0.104637	0.297387	0	1	1	FALSE
ACFLL8_06955	tssF	1623582	1625417	+	612	type VI secretion system baseplate subunit TssF	321.661	0.868167	0.248179	0	1	1	321.661	-0.529559	0.256285	0	1	1	FALSE
ACFLL8_06960	tssG	1625381	1626598	+	406	type VI secretion system baseplate subunit TssG	345.248	0.770679	0.280455	0	1	1	345.248	-0.372564	0.285946	0	1	1	FALSE
ACFLL8_06965	tssH	1626595	1629315	+	907	type VI secretion system ATPase TssH	798.583	1.01167	0.231507	0.050402	0.959802	1	798.583	-0.412259	0.235022	0	1	1	FALSE
ACFLL8_06970	tssJ	1629326	1629934	+	203	type VI secretion system lipoprotein TssJ	98.362	0.0150344	0.334227	0	1	1	98.362	-0.18424	0.340184	0	1	1	FALSE
ACFLL8_06975	tssK	1630007	1631350	+	448	type VI secretion system baseplate subunit TssK	214.483	0.093851	0.231294	0	1	1	214.483	-0.428098	0.237668	0	1	1	FALSE
ACFLL8_06980	icmH	1631347	1632129	+	261	type IVB secretion system protein IcmH/DotU	147.133	-0.200163	0.242071	0	1	1	147.133	-0.537812	0.249415	0	1	1	FALSE
ACFLL8_06985		1632141	1636169	+	1343	type VI secretion protein IcmF/TssM N-terminal domain-containing protein	1032.08	1.26921	0.182877	1.47206	0.141005	0.536801	1032.08	-0.167092	0.186199	0	1	1	FALSE
ACFLL8_06990	tagF	1636174	1637193	+	340	type VI secretion system-associated protein TagF	310.103	0.804481	0.199893	0	1	1	310.103	-0.238929	0.207584	0	1	1	FALSE
ACFLL8_06995	tssM	1637190	1639682	+	831	type VI secretion system membrane subunit TssM	878.599	1.61169	0.202649	3.01848	0.0025405	0.0164664	878.599	0.0956812	0.206222	0	1	1	FALSE
ACFLL8_07000		1639983	1640528	+	182	Hcp family type VI secretion system effector	2868.15	0.774848	0.209558	0	1	1	2868.15	-0.274305	0.210375	0	1	1	FALSE
ACFLL8_07005	tssA	1640903	1642015	+	371	type VI secretion system protein TssA	466.316	0.689728	0.204332	0	1	1	466.316	0.123214	0.207443	0	1	1	FALSE
ACFLL8_07010		1642015	1643172	+	386	hypothetical protein	199.382	0.0017153	0.217478	0	1	1	199.382	0.408289	0.217259	0	1	1	FALSE
ACFLL8_07015		1643319	1645916	+	866	type VI secretion system Vgr family protein	242.654	-0.685781	0.206628	0	1	1	242.654	-0.0099855	0.204407	0	1	1	FALSE
ACFLL8_07020		1645927	1646847	+	307	DUF4123 domain-containing protein	231.477	0.792601	0.266224	0	1	1	231.477	0.0455422	0.272026	0	1	1	FALSE
ACFLL8_07025		1646844	1649525	+	894	T6SS effector BTH_I2691 family protein	8341.79	1.8689	0.30548	2.84438	0.0044498	0.0271391	8341.79	0.206955	0.305754	0	1	1	FALSE
ACFLL8_07030		1649547	1650551	+	335	DUF6708 domain-containing protein	2990.84	1.84544	0.279369	3.02625	0.00247611	0.0161085	2990.84	0.269594	0.28015	0	1	1	FALSE
ACFLL8_07035		1650700	1650978	+	93	PAAR domain-containing protein	1119.27	0.790321	0.274788	0	1	1	1119.27	-0.134146	0.276198	0	1	1	FALSE
ACFLL8_07040		1651133	1651270	+	46	hypothetical protein	293.677	0.138392	0.296181	0	1	1	293.677	-0.0644492	0.2984	0	1	1	FALSE
ACFLL8_07045		1651270	1652427	+	386	hypothetical protein	402.87	-0.685248	0.285071	0	1	1	402.87	0.0604988	0.283879	0	1	1	FALSE
ACFLL8_07050		1652574	1655171	+	866	type VI secretion system Vgr family protein	621.204	-0.280234	0.275829	0	1	1	621.204	-0.0682456	0.276164	0	1	1	FALSE
ACFLL8_07055		1655140	1656102	+	321	DUF4123 domain-containing protein	432.94	0.390152	0.218909	0	1	1	432.94	0.214077	0.220741	0	1	1	FALSE
ACFLL8_07060		1656099	1658885	+	929	T6SS effector BTH_I2691 family protein	4064.69	1.76292	0.325853	2.3413	0.0192166	0.0991307	4064.69	0.0562242	0.326405	0	1	1	FALSE
ACFLL8_07065		1658894	1659928	+	345	DUF6708 domain-containing protein	3991.73	1.1419	0.271353	0.522946	0.601012	1	3991.73	-0.2021	0.271905	0	1	1	FALSE
ACFLL8_07070		1659981	1660922	+	314	DUF6708 domain-containing protein	3973.95	0.505279	0.2659	0	1	1	3973.95	-0.156385	0.266229	0	1	1	FALSE
ACFLL8_07075		1660964	1661242	+	93	PAAR domain-containing protein	1264.08	0.91477	0.19437	0	1	1	1264.08	-0.0668916	0.196191	0	1	1	FALSE
ACFLL8_07080		1661604	1662350	+	249	DUF6708 domain-containing protein	221.659	2.06929	0.378081	2.82821	0.00468092	0.0283003	221.659	-0.740979	0.396465	0	1	1	FALSE
ACFLL8_07085		1662498	1663379	+	294	DUF6708 domain-containing protein	361.419	1.58385	0.231585	2.52111	0.0116986	0.0641141	361.419	-0.703572	0.245028	0	1	1	FALSE
ACFLL8_07090		1663446	1663724	+	93	PAAR domain-containing protein	498.284	3.25649	0.241036	9.36161	7.85334e-21	3.88574e-19	498.284	-0.0149317	0.256876	0	1	1	FALSE
ACFLL8_07095		1664021	1664653	+	211	putative quinol monooxygenase	107.399	1.03336	0.329073	0.10138	0.919248	1	107.399	0.0658978	0.341124	0	1	1	FALSE
ACFLL8_07100		1664760	1665524	-	255	SDR family NAD%28P%29-dependent oxidoreductase	263.976	-0.426479	0.238999	0	1	1	263.976	0.377307	0.236648	0	1	1	FALSE
ACFLL8_07105		1666018	1666914	+	299	drug/metabolite transporter	164.627	0.113043	0.248721	0	1	1	164.627	0.422746	0.249239	0	1	1	FALSE
ACFLL8_07110		1667047	1668528	-	494	mannitol dehydrogenase family protein	132.914	-0.355965	0.289862	0	1	1	132.914	0.326735	0.287136	0	1	1	FALSE
ACFLL8_07115		1668676	1670436	-	587	purine-cytosine permease family protein	252.682	0.277555	0.200103	0	1	1	252.682	0.316738	0.202187	0	1	1	FALSE
ACFLL8_07120		1671192	1671566	+	125	RcnB family protein	286.709	1.88966	0.29229	3.04375	0.00233648	0.015285	286.709	0.410002	0.29939	0	1	1	FALSE
ACFLL8_07125		1671660	1672268	-	203	helix-turn-helix domain-containing protein	191.684	1.25794	0.278252	0.926993	0.35393	1	191.684	0.205064	0.286638	0	1	1	FALSE
ACFLL8_07130		1672671	1673729	+	353	C4-dicarboxylate ABC transporter substrate-binding protein	156.526	-0.479281	0.235612	0	1	1	156.526	-0.605983	0.240834	0	1	1	FALSE
ACFLL8_07135		1673809	1674324	+	172	TRAP transporter small permease subunit	29.1526	-0.334071	0.474685	0	1	1	29.1526	-0.222761	0.481503	0	1	1	FALSE
ACFLL8_07140		1674321	1675649	+	443	TRAP transporter large permease subunit	128.095	-0.649971	0.247528	0	1	1	128.095	-0.366453	0.248653	0	1	1	FALSE
ACFLL8_07145		1675681	1676721	+	347	Ldh family oxidoreductase	198.782	-0.0146419	0.232467	0	1	1	198.782	-0.0127113	0.235174	0	1	1	FALSE
ACFLL8_07150		1677027	1678121	+	365	ADP-ribosylglycohydrolase family protein	94.9231	0.292384	0.270935	0	1	1	94.9231	0.446705	0.273596	0	1	1	FALSE
ACFLL8_07155		1678960	1679304	+	115	hypothetical protein	114.793	0.671974	0.251574	0	1	1	114.793	0.270467	0.259753	0	1	1	FALSE
ACFLL8_07160		1679372	1679710	+	113	hypothetical protein	101.007	-0.850298	0.282992	0	1	1	101.007	-0.488762	0.283212	0	1	1	FALSE
ACFLL8_07165		1679777	1680115	+	113	hypothetical protein	73.0034	-1.12006	0.34351	-0.349503	0.726712	1	73.0034	-0.157824	0.333793	0	1	1	FALSE
ACFLL8_07170		1680182	1680520	+	113	hypothetical protein	66.4139	-0.939161	0.289227	0	1	1	66.4139	-0.354531	0.28488	0	1	1	FALSE
ACFLL8_07175		1680598	1680945	+	116	hypothetical protein	123.232	-0.244398	0.299979	0	1	1	123.232	0.386707	0.297669	0	1	1	FALSE
ACFLL8_07180		1681431	1681844	-	138	DUF6691 family protein	62.6875	1.01673	0.461614	0.0362345	0.971095	1	62.6875	0.369292	0.472227	0	1	1	FALSE
ACFLL8_07185		1681841	1682341	-	167	YeeE/YedE family protein	221.428	2.26817	0.251821	5.036	4.75361e-07	5.88008e-06	221.428	0.850389	0.261512	0	1	1	FALSE
ACFLL8_07190		1682811	1683713	-	301	LysR family transcriptional regulator	186.533	0.718591	0.309679	0	1	1	186.533	-0.73271	0.321718	0	1	1	FALSE
ACFLL8_07195		1683850	1684836	+	329	zinc-dependent alcohol dehydrogenase family protein	106.465	0.0800319	0.247008	0	1	1	106.465	-0.474475	0.259453	0	1	1	FALSE
ACFLL8_07200		1684971	1685780	+	270	SDR family NAD%28P%29-dependent oxidoreductase	390.261	1.13424	0.20276	0.662083	0.507918	1	390.261	0.155397	0.208142	0	1	1	FALSE
ACFLL8_07205		1685885	1686013	-	43	putative transporter small subunit	48.4804	2.08854	0.376114	2.89416	0.00380173	0.0234306	48.4804	-0.75378	0.455841	0	1	1	FALSE
ACFLL8_07210		1686097	1687740	-	548	sodium:solute symporter family protein	393.813	1.13013	0.221188	0.588334	0.556308	1	393.813	-0.142362	0.227567	0	1	1	FALSE
ACFLL8_07215		1688682	1688993	-	104	putative quinol monooxygenase	199.948	-1.00623	0.234627	-0.0265508	0.978818	1	199.948	-0.0542566	0.229697	0	1	1	FALSE
ACFLL8_07220		1689220	1690710	-	497	CoA-acylating methylmalonate-semialdehyde dehydrogenase	490.986	-1.82966	0.225792	-3.67446	0.00023835	0.00183624	490.986	0.0957085	0.218693	0	1	1	FALSE
ACFLL8_07225		1690830	1692179	-	450	aspartate aminotransferase family protein	538.404	-1.63262	0.211733	-2.98782	0.00280977	0.0179795	538.404	0.560641	0.203911	0	1	1	FALSE
ACFLL8_07230		1692330	1693316	+	329	LysR family transcriptional regulator	687.083	-0.178548	0.206492	0	1	1	687.083	0.788684	0.205122	0	1	1	FALSE
ACFLL8_07235		1693392	1694102	-	237	helix-turn-helix domain-containing protein	672.987	-0.718499	0.2973	0	1	1	672.987	0.766007	0.295235	0	1	1	FALSE
ACFLL8_07240		1694432	1695577	-	382	aminomethyltransferase family protein	7398.62	0.995203	1.17913	0	1	1	7398.62	2.89137	1.17908	1.60411	0.10869	1	FALSE
ACFLL8_07245	glnT	1696276	1697610	+	445	type III glutamate--ammonia ligase	17407.9	1.86408	0.452472	1.90968	0.0561744	0.247915	17407.9	4.52045	0.452364	7.78234	7.11942e-15	1.66737e-12	FALSE
ACFLL8_07250		1697728	1698645	+	306	glutamine amidotransferase family protein	15778	1.89846	1.35128	0.664898	0.506116	1	15778	4.63352	1.35123	2.68904	0.00716585	0.484108	FALSE
ACFLL8_07255		1698645	1699331	+	229	protein glxC	11787.7	1.40237	1.51697	0.26525	0.790817	1	11787.7	4.56012	1.5169	2.34698	0.0189265	1	FALSE
ACFLL8_07260		1699346	1700686	+	447	FMN-binding glutamate synthase family protein	22073.8	2.19332	1.5122	0.789126	0.430038	1	22073.8	4.79639	1.51218	2.51055	0.0120544	0.76995	FALSE
ACFLL8_07265		1701374	1702060	+	229	dimethylamine monooxygenase subunit DmmA family protein	5769.8	0.0551419	1.10886	0	1	1	5769.8	2.84089	1.1087	1.66041	0.0968327	1	FALSE
ACFLL8_07270		1702045	1702989	+	315	PDR/VanB family oxidoreductase	7138.6	-0.599023	1.61476	0	1	1	7138.6	2.54262	1.61465	0.955389	0.339381	1	FALSE
ACFLL8_07275		1703029	1704084	+	352	DUF3445 domain-containing protein	14361.5	0.0741073	1.85237	0	1	1	14361.5	2.62544	1.85234	0.877506	0.380212	1	FALSE
ACFLL8_07280	amt	1704231	1705577	+	449	ammonium transporter	13186.4	0.99009	1.88009	0	1	1	13186.4	2.55189	1.88008	0.825439	0.409123	1	FALSE
ACFLL8_07285		1705789	1706631	-	281	IclR family transcriptional regulator	691.298	0.695599	0.420453	0	1	1	691.298	2.27883	0.419181	3.05079	0.00228241	0.170598	FALSE
ACFLL8_07320		1714565	1714936	+	124	hypothetical protein	141.07	1.40032	0.298331	1.34186	0.179643	0.660821	141.07	0.831125	0.304635	0	1	1	FALSE
ACFLL8_07325		1715320	1715604	+	95	hypothetical protein	350.682	3.5197	0.254272	9.9095	3.78531e-23	2.17997e-21	350.682	1.12509	0.265782	0.470658	0.637885	1	FALSE
ACFLL8_07330		1715783	1716670	-	296	LysR substrate-binding domain-containing protein	216.085	0.814622	0.244744	0	1	1	216.085	0.173304	0.250706	0	1	1	FALSE
ACFLL8_07335		1716793	1717083	+	97	putative quinol monooxygenase	36.6397	1.88015	0.401447	2.19245	0.0283472	0.138311	36.6397	0.373309	0.441275	0	1	1	FALSE
ACFLL8_07340		1717098	1717244	+	49	hypothetical protein	5.05509	-1.3166	0.902504	-0.350797	0.725741	1	5.05509	-0.439805	0.853343	0	1	1	FALSE
ACFLL8_07345		1717383	1718573	+	397	L-dopachrome tautomerase-related protein	114.252	0.387751	0.274446	0	1	1	114.252	0.41588	0.277845	0	1	1	FALSE
ACFLL8_07350		1718898	1719911	+	338	zinc-binding alcohol dehydrogenase family protein	130.602	0.562679	0.268006	0	1	1	130.602	0.707419	0.269952	0	1	1	FALSE
ACFLL8_07355		1720376	1720894	+	173	RcnB family protein	987.016	0.63839	0.236929	0	1	1	987.016	0.359721	0.237783	0	1	1	FALSE
ACFLL8_07360		1721126	1721575	+	150	RcnB family protein	657.459	0.767415	0.319653	0	1	1	657.459	-0.0923176	0.321595	0	1	1	FALSE
ACFLL8_07365		1721713	1723116	-	468	amidase	659.452	-1.98456	0.226086	-4.35479	1.33192e-05	0.00013407	659.452	-0.453177	0.221959	0	1	1	FALSE
ACFLL8_07370		1723113	1723796	-	228	DUF2848 domain-containing protein	339.007	-3.32316	0.334565	-6.94381	3.8166e-12	8.82087e-11	339.007	-0.669106	0.317054	0	1	1	FALSE
ACFLL8_07375		1723910	1725190	-	427	TRAP transporter large permease	540.136	-1.52214	0.241206	-2.16471	0.03041	0.146745	540.136	-0.281795	0.238148	0	1	1	FALSE
ACFLL8_07380		1725190	1725795	-	202	TRAP transporter small permease subunit	176.575	-2.49364	0.389401	-3.83573	0.00012519	0.0010204	176.575	-0.446384	0.373977	0	1	1	FALSE
ACFLL8_07385		1725960	1727006	-	349	TRAP transporter substrate-binding protein	954.344	-3.59773	0.326778	-7.94954	1.87199e-15	5.8717e-14	954.344	-0.223312	0.317352	0	1	1	FALSE
ACFLL8_07390		1727099	1727899	-	267	putative hydro-lyase	210.717	-1.63751	0.285014	-2.23678	0.0253006	0.124483	210.717	-0.0296004	0.275212	0	1	1	FALSE
ACFLL8_07395		1728115	1729017	-	301	LysR family transcriptional regulator	103.164	0.179068	0.312661	0	1	1	103.164	-0.0776163	0.31914	0	1	1	FALSE
ACFLL8_07400		1729496	1730425	+	310	LysR family transcriptional regulator	539.718	0.279379	0.230518	0	1	1	539.718	-0.187879	0.232802	0	1	1	FALSE
ACFLL8_07405		1730551	1731426	+	292	MBL fold metallo-hydrolase	247.506	0.486588	0.288906	0	1	1	247.506	0.263606	0.291508	0	1	1	FALSE
ACFLL8_07410	dctP	1731803	1732831	+	343	TRAP transporter substrate-binding protein DctP	1839.19	-2.51027	0.403611	-3.74189	0.00018264	0.00144183	1839.19	-0.927407	0.402565	0	1	1	FALSE
ACFLL8_07415		1733032	1733607	+	192	TRAP transporter small permease	284.56	-2.38265	0.415701	-3.32607	0.00088081	0.00611518	284.56	-1.10119	0.410871	-0.246294	0.805455	1	FALSE
ACFLL8_07420		1733604	1734881	+	426	TRAP transporter large permease	335.623	-1.97661	0.414853	-2.35411	0.018567	0.0963453	335.623	-0.984345	0.412408	0	1	1	FALSE
ACFLL8_07425		1734888	1735649	+	254	M15 family metallopeptidase	110.979	-2.63359	0.373618	-4.37236	1.22909e-05	0.00012515	110.979	-1.25179	0.356546	-0.706195	0.480067	1	FALSE
ACFLL8_07430		1735763	1737040	-	426	Zn-dependent hydrolase	795.705	-1.18167	0.973259	-0.186661	0.851927	1	795.705	-0.23229	0.972948	0	1	1	FALSE
ACFLL8_07435		1737090	1737911	-	274	FadR/GntR family transcriptional regulator	471.897	0.921074	0.96609	0	1	1	471.897	-0.0022237	0.96702	0	1	1	FALSE
ACFLL8_07440		1738142	1739563	+	474	NAD%28P%29/FAD-dependent oxidoreductase	2165.62	-1.12498	0.161291	-0.774855	0.438425	1	2165.62	-0.25961	0.160709	0	1	1	FALSE
ACFLL8_07445		1739686	1740858	-	391	L-lactate dehydrogenase	2906.81	1.26794	0.252909	1.05943	0.289403	0.971963	2906.81	-0.531026	0.254057	0	1	1	FALSE
ACFLL8_07450	bla	1741107	1742156	+	350	class A beta-lactamase	838.868	0.892003	0.225397	0	1	1	838.868	-0.166479	0.22795	0	1	1	FALSE
ACFLL8_07455		1742439	1743545	+	369	NADH:flavin oxidoreductase/NADH oxidase	883.776	0.784042	0.283301	0	1	1	883.776	0.401932	0.284215	0	1	1	FALSE
ACFLL8_07460		1743777	1744733	+	319	NAD%28P%29-dependent oxidoreductase	378.119	-1.43753	0.20591	-2.12486	0.0335983	0.161024	378.119	-1.51765	0.209025	-2.47648	0.0132685	0.832359	FALSE
ACFLL8_07465		1744843	1745592	+	250	class II aldolase/adducin family protein	527.069	-1.63156	0.254398	-2.48257	0.0130438	0.0706052	527.069	-1.3618	0.254826	-1.41978	0.155673	1	FALSE
ACFLL8_07470		1745677	1746351	+	225	TetR/AcrR family transcriptional regulator	252.374	-2.67708	0.361243	-4.64252	3.44184e-06	3.7785e-05	252.374	-1.43381	0.354367	-1.2242	0.220878	1	FALSE
ACFLL8_07475		1746354	1747538	+	395	pyridoxal phosphate-dependent aminotransferase	328.377	-2.00551	0.249956	-4.02276	5.75206e-05	0.00050644	328.377	-1.16207	0.246704	-0.65695	0.511213	1	FALSE
ACFLL8_07480		1747647	1747865	-	73	TIGR02450 family Trp-rich protein	90.7842	0.972204	0.3663	0	1	1	90.7842	0.0688874	0.378486	0	1	1	FALSE
ACFLL8_07485		1747908	1748813	-	302	LysR family transcriptional regulator	108.043	0.336837	0.277824	0	1	1	108.043	-0.291138	0.289105	0	1	1	FALSE
ACFLL8_07490		1749201	1750214	+	338	D-cysteine desulfhydrase	174.19	-0.138705	0.326781	0	1	1	174.19	0.271301	0.326587	0	1	1	FALSE
ACFLL8_07495	hisD	1750342	1751658	+	439	histidinol dehydrogenase	143.079	-1.53792	0.334283	-1.60918	0.107577	0.429454	143.079	-0.000301	0.323026	0	1	1	FALSE
ACFLL8_07500		1751668	1752876	+	403	DegT/DnrJ/EryC1/StrS family aminotransferase	159.172	-0.270718	0.237788	0	1	1	159.172	0.251032	0.236492	0	1	1	FALSE
ACFLL8_07505		1753045	1753983	+	313	TRAP transporter substrate-binding protein	394.364	0.933513	0.212663	0	1	1	394.364	0.4017	0.215905	0	1	1	FALSE
ACFLL8_07510		1754120	1754677	+	186	TRAP transporter small permease	46.1292	0.234459	0.584626	0	1	1	46.1292	0.479737	0.586135	0	1	1	FALSE
ACFLL8_07515		1754682	1755962	+	427	TRAP transporter large permease	570.207	0.0397431	0.209223	0	1	1	570.207	0.245378	0.209687	0	1	1	FALSE
ACFLL8_07520		1756075	1756794	+	240	aspartate/glutamate racemase family protein	348.009	0.426848	0.221013	0	1	1	348.009	0.157663	0.22366	0	1	1	FALSE
ACFLL8_07525		1756951	1757862	-	304	helix-turn-helix domain-containing protein	207.769	0.153272	0.244714	0	1	1	207.769	0.125952	0.247279	0	1	1	FALSE
ACFLL8_07540		1761522	1761827	-	102	hypothetical protein	18.1034	2.09201	0.548559	1.99069	0.0465149	0.212769	18.1034	0.825151	0.596198	0	1	1	FALSE
ACFLL8_07545		1762005	1762847	+	281	alpha/beta fold hydrolase	272.615	0.990995	0.292663	0	1	1	272.615	0.21162	0.29716	0	1	1	FALSE
ACFLL8_07550		1763265	1766096	+	944	type VI secretion system Vgr family protein	936.181	1.19941	0.332952	0.598917	0.549228	1	936.181	-0.287311	0.335086	0	1	1	FALSE
ACFLL8_07555		1766110	1770930	+	1607	RHS repeat-associated core domain-containing protein	3376.21	1.51451	0.176117	2.9214	0.00348459	0.0217741	3376.21	-0.121736	0.177318	0	1	1	FALSE
ACFLL8_07560		1770940	1771323	+	128	hypothetical protein	1363.99	2.8344	0.261314	7.0199	2.22029e-12	5.27019e-11	1363.99	-0.148163	0.265918	0	1	1	FALSE
ACFLL8_07565		1772515	1772643	-	43	IS30 family transposase	37.9511	-0.648827	0.43861	0	1	1	37.9511	-0.711568	0.449149	0	1	1	FALSE
ACFLL8_07570		1772646	1772699	+	18	hypothetical protein	8.15965	-0.487357	0.659279	0	1	1	8.15965	-0.763149	0.705754	0	1	1	FALSE
ACFLL8_07575		1772778	1775009	+	744	RHS repeat-associated core domain-containing protein	960.786	-0.0914572	0.174894	0	1	1	960.786	0.185244	0.17509	0	1	1	FALSE
ACFLL8_07580		1775017	1775367	+	117	hypothetical protein	999.056	0.885026	0.188847	0	1	1	999.056	0.466806	0.190101	0	1	1	FALSE
ACFLL8_07585		1775485	1776024	+	180	RHS repeat-associated core domain-containing protein	76.5102	0.713174	0.371759	0	1	1	76.5102	-0.318133	0.388585	0	1	1	FALSE
ACFLL8_07590		1776056	1776193	+	46	hypothetical protein	24.4129	1.09685	0.560544	0.172786	0.862819	1	24.4129	-0.190601	0.600778	0	1	1	FALSE
ACFLL8_07595		1776202	1776585	+	128	hypothetical protein	176.377	-0.234953	0.290351	0	1	1	176.377	-0.554751	0.295388	0	1	1	FALSE
ACFLL8_07600		1776805	1778142	+	446	RHS repeat-associated core domain-containing protein	178.471	1.07162	0.22967	0.311841	0.755161	1	178.471	-0.364981	0.245083	0	1	1	FALSE
ACFLL8_07605		1778145	1778678	+	178	SMI1/KNR4 family protein	205.645	0.579573	0.256953	0	1	1	205.645	-0.522641	0.266929	0	1	1	FALSE
ACFLL8_07610		1778760	1779776	+	339	IS30 family transposase	771.803	0.372239	0.248633	0	1	1	771.803	0.469829	0.249078	0	1	1	FALSE
ACFLL8_07615		1780209	1780907	-	233	GNAT family N-acetyltransferase	1287.76	3.03638	0.234199	8.69507	3.46603e-18	1.43249e-16	1287.76	0.123558	0.239295	0	1	1	FALSE
ACFLL8_07620		1781249	1782871	+	541	ABC transporter substrate-binding protein	240.195	2.65671	1.17868	1.40556	0.159854	0.597411	240.195	0.239625	1.18266	0	1	1	FALSE
ACFLL8_07625		1782868	1783794	+	309	ABC transporter permease	212.122	1.94614	1.08638	0.870906	0.383805	1	212.122	-0.414311	1.09142	0	1	1	FALSE
ACFLL8_07630		1783791	1784708	+	306	ABC transporter permease	187.295	2.03434	1.2728	0.812651	0.416418	1	187.295	-0.124261	1.27696	0	1	1	FALSE
ACFLL8_07635		1784705	1786222	+	506	ABC transporter ATP-binding protein	700.187	2.03805	1.32436	0.783814	0.433149	1	700.187	-0.120956	1.32543	0	1	1	FALSE
ACFLL8_07640		1786386	1786925	-	180	TspO/MBR family protein	127.782	0.654747	0.338559	0	1	1	127.782	0.641159	0.341203	0	1	1	FALSE
ACFLL8_07645	rhtA	1787015	1787908	-	298	threonine/homoserine exporter RhtA	87.4448	1.56887	0.448481	1.26844	0.20464	0.735823	87.4448	0.255016	0.462209	0	1	1	FALSE
ACFLL8_07650		1788054	1788626	+	191	helix-turn-helix domain-containing protein	766.347	1.72668	0.209238	3.473	0.00051468	0.00374344	766.347	0.387917	0.212622	0	1	1	FALSE
ACFLL8_07655		1789214	1790659	+	482	Na%2B/H%2B antiporter NhaC family protein	821.885	-1.35371	0.286381	-1.2351	0.216793	0.770844	821.885	0.0648735	0.284454	0	1	1	FALSE
ACFLL8_07660		1790938	1791975	+	346	hypothetical protein	1835.41	-2.04018	0.30777	-3.37974	0.00072556	0.00511823	1835.41	0.405595	0.305753	0	1	1	FALSE
ACFLL8_07665		1792260	1792709	-	150	DUF3455 domain-containing protein	85.9548	-1.55377	0.313588	-1.76591	0.0774114	0.323746	85.9548	-0.723986	0.305458	0	1	1	FALSE
ACFLL8_07670		1793146	1793685	-	180	redoxin domain-containing protein	536.621	0.83355	0.436277	0	1	1	536.621	-0.105778	0.438143	0	1	1	FALSE
ACFLL8_07675		1793869	1794438	-	190	manganese efflux pump MntP family protein	222.472	2.0358	0.384863	2.69134	0.00711656	0.0410517	222.472	0.328554	0.393053	0	1	1	FALSE
ACFLL8_07680	yghU	1794810	1795673	+	288	glutathione-dependent disulfide-bond oxidoreductase	1159.51	0.606637	0.274177	0	1	1	1159.51	0.545267	0.274589	0	1	1	FALSE
ACFLL8_07685		1795779	1796843	-	355	alcohol dehydrogenase family protein	83.5829	-0.333339	0.349328	0	1	1	83.5829	-0.2148	0.352474	0	1	1	FALSE
ACFLL8_07690		1796840	1797361	-	174	TetR/AcrR family transcriptional regulator	85.3425	0.388516	0.285706	0	1	1	85.3425	0.401869	0.290264	0	1	1	FALSE
ACFLL8_07695		1797747	1799927	+	727	TonB-dependent siderophore receptor	205.914	0.237844	0.281748	0	1	1	205.914	0.172481	0.284182	0	1	1	FALSE
ACFLL8_07700		1800134	1801036	+	301	LysR family transcriptional regulator	288.141	-0.30127	0.212513	0	1	1	288.141	-0.0705448	0.213346	0	1	1	FALSE
ACFLL8_07705		1801258	1801740	+	161	HD-GYP domain-containing protein	362.858	-0.489409	0.244035	0	1	1	362.858	0.731921	0.240669	0	1	1	FALSE
ACFLL8_07710		1801833	1802702	-	290	urea carboxylase-associated family protein	292.727	-0.345784	0.226726	0	1	1	292.727	-0.0713461	0.227268	0	1	1	FALSE
ACFLL8_07715		1802964	1804277	-	438	arsenic transporter	220.804	-0.461662	0.257428	0	1	1	220.804	0.062791	0.256506	0	1	1	FALSE
ACFLL8_07720	arsH	1804339	1805073	-	245	arsenical resistance protein ArsH	49.5072	-0.319892	0.346402	0	1	1	49.5072	0.295766	0.341661	0	1	1	FALSE
ACFLL8_07725	arsC	1805125	1805556	-	144	arsenate reductase %28glutaredoxin%29	17.2615	-0.0920756	0.487659	0	1	1	17.2615	-0.356649	0.514156	0	1	1	FALSE
ACFLL8_07730		1805549	1805953	-	135	ArsR/SmtB family transcription factor	27.6059	0.7847	0.444851	0	1	1	27.6059	0.223008	0.467972	0	1	1	FALSE
ACFLL8_07735		1806113	1807027	-	305	LysR substrate-binding domain-containing protein	221.07	-0.422205	0.241542	0	1	1	221.07	-0.212034	0.242669	0	1	1	FALSE
ACFLL8_07740		1807229	1808485	+	419	M24 family metallopeptidase	353.082	-0.237723	0.239721	0	1	1	353.082	0.212822	0.239426	0	1	1	FALSE
ACFLL8_07745		1808767	1810398	+	544	BCCT family transporter	319.571	-0.120999	0.23209	0	1	1	319.571	0.0510292	0.233019	0	1	1	FALSE
ACFLL8_07750		1810482	1810865	+	128	hypothetical protein	280.122	0.412475	0.236628	0	1	1	280.122	-0.028729	0.24063	0	1	1	FALSE
ACFLL8_07755		1810925	1812013	+	363	NAD-dependent epimerase/dehydratase family protein	780.276	-0.0041352	0.178819	0	1	1	780.276	0.048892	0.17959	0	1	1	FALSE
ACFLL8_07760		1812031	1812243	-	71	DUF3820 family protein	430.664	1.70506	0.27237	2.5886	0.00963678	0.0542532	430.664	0.241799	0.277504	0	1	1	FALSE
ACFLL8_07765		1812380	1813846	+	489	aldehyde dehydrogenase family protein	396.699	-0.415488	0.232861	0	1	1	396.699	0.188288	0.232002	0	1	1	FALSE
ACFLL8_07770	copD	1814026	1814970	-	315	copper homeostasis membrane protein CopD	338.038	0.050206	0.208102	0	1	1	338.038	0.0471532	0.209882	0	1	1	FALSE
ACFLL8_07775	copC	1814904	1815269	-	122	copper homeostasis periplasmic binding protein CopC	372.575	0.422822	0.335602	0	1	1	372.575	-0.2871	0.338577	0	1	1	FALSE
ACFLL8_07780		1815437	1816243	-	269	sulfite exporter TauE/SafE family protein	151.411	-0.0843372	0.236354	0	1	1	151.411	-0.157518	0.240652	0	1	1	FALSE
ACFLL8_07785		1816631	1817305	+	225	response regulator	547.129	0.362192	0.179091	0	1	1	547.129	0.315212	0.180434	0	1	1	FALSE
ACFLL8_07790		1817283	1818617	+	445	ATP-binding protein	1008.09	0.260873	0.194463	0	1	1	1008.09	0.0422612	0.195451	0	1	1	FALSE
ACFLL8_07795		1818696	1820558	+	621	copper resistance system multicopper oxidase	1058.11	-0.144644	0.172899	0	1	1	1058.11	0.134269	0.173078	0	1	1	FALSE
ACFLL8_07800		1820568	1821350	+	261	copper resistance protein B	610.633	0.247543	0.187046	0	1	1	610.633	0.229454	0.188142	0	1	1	FALSE
ACFLL8_07805		1821553	1822257	+	235	c-type cytochrome	633.485	0.49442	0.214565	0	1	1	633.485	0.113111	0.216334	0	1	1	FALSE
ACFLL8_07810		1822343	1823566	-	408	TauD/TfdA family dioxygenase	354.85	-1.64591	0.220516	-2.92909	0.00339955	0.0213643	354.85	-0.206671	0.214002	0	1	1	FALSE
ACFLL8_07815		1823692	1824783	-	364	GlxA family transcriptional regulator	258.768	-0.849495	0.203004	0	1	1	258.768	-0.610993	0.204076	0	1	1	FALSE
ACFLL8_07820		1824991	1826382	-	464	diguanylate cyclase	2384.36	0.0308005	0.351946	0	1	1	2384.36	-1.04705	0.352663	-0.1334	0.893877	1	FALSE
ACFLL8_07825		1826671	1829088	+	806	DNA polymerase II	862.934	-0.793802	0.184609	0	1	1	862.934	-0.20504	0.184095	0	1	1	FALSE
ACFLL8_07830		1829335	1831092	+	586	multidrug ABC transporter permease/ATP-binding protein	253.008	1.40499	0.409629	0.988665	0.322827	1	253.008	0.395327	0.41373	0	1	1	FALSE
ACFLL8_07835		1831451	1833514	+	688	TonB-dependent siderophore receptor	467.89	0.657782	0.320137	0	1	1	467.89	0.509867	0.321183	0	1	1	FALSE
ACFLL8_07840		1833651	1834838	-	396	DUF1513 domain-containing protein	314.254	0.582155	0.263836	0	1	1	314.254	-0.179393	0.268409	0	1	1	FALSE
ACFLL8_07845		1834855	1836012	-	386	imelysin family protein	203.582	0.305831	0.326514	0	1	1	203.582	-0.288392	0.331512	0	1	1	FALSE
ACFLL8_07850		1836099	1837571	-	491	di-heme oxidoredictase family protein	311.789	1.13249	0.344969	0.384075	0.700923	1	311.789	-0.252085	0.350688	0	1	1	FALSE
ACFLL8_07855		1837778	1839088	-	437	imelysin family protein	1831.97	2.9762	0.437553	4.51648	6.28773e-06	6.63328e-05	1831.97	-0.131219	0.439778	0	1	1	FALSE
ACFLL8_07860		1839375	1841018	-	548	ABC transporter ATP-binding protein	1028.02	-0.505477	0.201092	0	1	1	1028.02	-0.0700489	0.200989	0	1	1	FALSE
ACFLL8_07865		1841027	1842136	-	370	ABC transporter permease	405.877	-0.81414	0.244669	0	1	1	405.877	-0.290633	0.244091	0	1	1	FALSE
ACFLL8_07870		1842138	1843226	-	363	microcin C ABC transporter permease YejB	534.443	-0.191583	0.212618	0	1	1	534.443	-0.1598	0.213675	0	1	1	FALSE
ACFLL8_07875		1843397	1845163	-	589	extracellular solute-binding protein	703.401	0.0833012	0.198222	0	1	1	703.401	-0.0478427	0.199437	0	1	1	FALSE
ACFLL8_07880		1845675	1847093	-	473	LysM peptidoglycan-binding domain-containing protein	280.668	0.582509	0.205924	0	1	1	280.668	0.0540098	0.210886	0	1	1	FALSE
ACFLL8_07885	gloB	1847271	1848059	-	263	hydroxyacylglutathione hydrolase	438.777	2.22601	0.207893	5.89732	3.69449e-09	6.06483e-08	438.777	0.0791962	0.2182	0	1	1	FALSE
ACFLL8_07890		1848480	1849325	+	282	methyltransferase domain-containing protein	950.402	-0.0552558	0.20446	0	1	1	950.402	0.0633298	0.204903	0	1	1	FALSE
ACFLL8_07895	rnhA	1849517	1850017	+	167	ribonuclease HI	363.846	0.599277	0.210951	0	1	1	363.846	-0.182003	0.215963	0	1	1	FALSE
ACFLL8_07900	dnaQ	1850174	1850947	+	258	DNA polymerase III subunit epsilon	438.498	0.706966	0.213628	0	1	1	438.498	-0.0870882	0.217712	0	1	1	FALSE
ACFLL8_07905	nudC	1850947	1851720	+	258	NAD%28%2B%29 diphosphatase	408.298	-0.236772	0.259186	0	1	1	408.298	-0.356299	0.260875	0	1	1	FALSE
ACFLL8_07910		1851839	1852156	-	106	SCP2 sterol-binding domain-containing protein	843.655	2.03558	0.354726	2.91938	0.00350726	0.0218458	843.655	-0.33323	0.358574	0	1	1	FALSE
ACFLL8_07915	sohB	1852486	1853580	+	365	protease SohB	1818.61	0.70438	0.334715	0	1	1	1818.61	-0.230141	0.335448	0	1	1	FALSE
ACFLL8_07920		1853812	1854126	-	105	ArsR/SmtB family transcription factor	9615.09	-1.38973	0.387424	-1.00595	0.31444	1	9615.09	-1.31732	0.387465	-0.818952	0.412814	1	FALSE
ACFLL8_07925		1854634	1856604	+	657	AMP-binding protein	4785.93	-0.953497	0.235379	0	1	1	4785.93	0.370334	0.235051	0	1	1	FALSE
ACFLL8_07930		1856725	1858326	-	534	Na%2B/H%2B antiporter NhaC family protein	1164.97	-0.882731	0.180587	0	1	1	1164.97	0.244604	0.179214	0	1	1	FALSE
ACFLL8_07935		1858838	1860289	+	484	alanine/glycine:cation symporter family protein	1474.78	1.16215	0.313526	0.517173	0.605036	1	1474.78	0.441882	0.314239	0	1	1	FALSE
ACFLL8_07940		1860523	1861188	+	222	7-cyano-7-deazaguanine/7-aminomethyl-7- deazaguanine transporter	202.86	2.91244	0.273349	6.99633	2.62747e-12	6.11279e-11	202.86	0.0682289	0.299048	0	1	1	FALSE
ACFLL8_07945		1861265	1862272	+	336	ParA family protein	1699.97	0.961419	0.195706	0	1	1	1699.97	-0.0607339	0.197094	0	1	1	FALSE
ACFLL8_07950		1862355	1863179	-	275	inositol monophosphatase family protein	953.905	2.00146	0.200553	4.99348	5.93013e-07	7.25872e-06	953.905	-0.0142675	0.205191	0	1	1	FALSE
ACFLL8_07955		1863687	1864946	+	420	alanine--glyoxylate aminotransferase family protein	2597.86	-3.12703	0.454986	-4.67493	2.94058e-06	3.27944e-05	2597.86	-1.29615	0.453977	-0.652345	0.514179	1	FALSE
ACFLL8_07960		1864943	1866277	+	445	allantoate amidohydrolase	2588.54	-3.55335	0.847576	-3.01253	0.00259081	0.0166694	2588.54	-1.18222	0.846711	-0.215203	0.829609	1	FALSE
ACFLL8_07965	uraD	1866303	1866836	-	178	2-oxo-4-hydroxy-4-carboxy-5-ureidoimidazoline decarboxylase	693.163	-1.19329	0.245273	-0.788068	0.430657	1	693.163	-0.689315	0.244942	0	1	1	FALSE
ACFLL8_07970	uraH	1867130	1867486	+	119	hydroxyisourate hydrolase	938.826	-2.88905	0.539199	-3.50343	0.00045931	0.00336856	938.826	-0.901921	0.536874	0	1	1	FALSE
ACFLL8_07975		1867496	1868743	+	416	urate hydroxylase PuuD	1892.23	-2.83176	1.06153	-1.72558	0.0844232	0.34808	1892.23	-0.779223	1.06094	0	1	1	FALSE
ACFLL8_07980		1868839	1870920	+	694	Cache 3/Cache 2 fusion domain-containing protein	5025.49	0.759686	0.246443	0	1	1	5025.49	-0.760006	0.247044	0	1	1	FALSE
ACFLL8_07985		1871099	1871743	-	215	TetR/AcrR family transcriptional regulator	267.71	0.19653	0.24579	0	1	1	267.71	0.169926	0.247756	0	1	1	FALSE
ACFLL8_07990		1872013	1874109	+	699	NADH:flavin oxidoreductase	1193.32	-0.868995	0.329415	0	1	1	1193.32	2.34062	0.325666	4.11655	3.8459e-05	0.00409413	FALSE
ACFLL8_07995		1874167	1874463	-	99	S26 family signal peptidase	68.4391	-0.131331	0.406657	0	1	1	68.4391	1.79793	0.386428	2.06488	0.0389343	1	FALSE
ACFLL8_08000	sodN	1874522	1875022	-	167	superoxide dismutase%2C Ni	42.6558	-0.828382	0.403084	0	1	1	42.6558	0.436435	0.383139	0	1	1	FALSE
ACFLL8_08005		1875025	1875234	-	70	hypothetical protein	46.4241	-1.56495	0.386533	-1.46159	0.143854	0.545743	46.4241	0.373916	0.343749	0	1	1	FALSE
ACFLL8_08010		1875260	1875679	-	140	hypothetical protein	67.7405	-0.800192	0.423404	0	1	1	67.7405	0.745331	0.407644	0	1	1	FALSE
ACFLL8_08015		1875877	1876596	-	240	hypothetical protein	325.092	0.633697	0.250284	0	1	1	325.092	0.56111	0.251923	0	1	1	FALSE
ACFLL8_08020		1877271	1877930	+	220	NADPH-dependent FMN reductase	282.053	-0.292063	0.239847	0	1	1	282.053	0.148485	0.239523	0	1	1	FALSE
ACFLL8_08025		1878048	1879106	-	353	type II asparaginase	2861.75	-2.35408	0.571866	-2.36783	0.0178928	0.0935379	2861.75	-0.705541	0.571398	0	1	1	FALSE
ACFLL8_08030		1879390	1881090	-	567	gamma-glutamyltransferase family protein	4396.31	-2.16033	0.460741	-2.5184	0.0117888	0.0645079	4396.31	-0.773434	0.460457	0	1	1	FALSE
ACFLL8_08035		1881156	1881995	-	280	sulfite exporter TauE/SafE family protein	2262.78	-1.92107	0.528948	-1.74133	0.0816258	0.33815	2262.78	-0.889513	0.528653	0	1	1	FALSE
ACFLL8_08040		1882241	1883569	-	443	TRAP transporter large permease subunit	2495.48	-3.13116	0.532476	-4.00236	6.27148e-05	0.00054534	2495.48	-0.971234	0.531402	0	1	1	FALSE
ACFLL8_08045		1883566	1884108	-	181	TRAP transporter small permease subunit	1056.04	-4.4093	0.859418	-3.96699	7.2787e-05	0.00062519	1056.04	-1.3862	0.855438	-0.451467	0.651653	1	FALSE
ACFLL8_08050		1884247	1885338	-	364	TRAP transporter substrate-binding protein	8965.17	-5.09375	1.12092	-3.65214	0.00026006	0.00197749	8965.17	-1.46274	1.12032	-0.413041	0.679577	1	FALSE
ACFLL8_08055		1886066	1887013	+	316	hypothetical protein	269.055	0.469537	0.221655	0	1	1	269.055	0.291178	0.224525	0	1	1	FALSE
ACFLL8_08060		1887034	1887486	-	151	Lrp/AsnC family transcriptional regulator	114.692	0.739395	0.337138	0	1	1	114.692	0.112215	0.345266	0	1	1	FALSE
ACFLL8_08065	ushA	1887677	1889392	-	572	bifunctional UDP-sugar hydrolase/5%27-nucleotidase UshA	1318.98	-1.34248	0.38745	-0.883927	0.376736	1	1318.98	-0.165016	0.386767	0	1	1	FALSE
ACFLL8_08070		1889744	1891174	-	477	uracil-xanthine permease family protein	4009.77	-3.29639	0.34412	-6.67323	2.50233e-11	5.26388e-10	4009.77	-0.388605	0.342566	0	1	1	FALSE
ACFLL8_08075		1891449	1891757	-	103	putative quinol monooxygenase	835.195	1.9017	0.179124	5.03397	4.80435e-07	5.92199e-06	835.195	0.00300369	0.184601	0	1	1	FALSE
ACFLL8_08080	nfsB	1891931	1892590	-	220	oxygen-insensitive NAD%28P%29H nitroreductase	358.336	-0.236023	0.198234	0	1	1	358.336	0.202515	0.19794	0	1	1	FALSE
ACFLL8_08085	guaD	1892777	1894321	-	515	guanine deaminase	1714.74	-3.17154	0.371813	-5.84041	5.20728e-09	8.39136e-08	1714.74	-0.249684	0.368571	0	1	1	FALSE
ACFLL8_08090	xdhC	1894318	1895316	-	333	xanthine dehydrogenase accessory protein XdhC	1455.89	-2.06057	0.315874	-3.35759	0.00078625	0.00551316	1455.89	0.0868298	0.313783	0	1	1	FALSE
ACFLL8_08095	xdhB	1895313	1897727	-	805	xanthine dehydrogenase molybdopterin binding subunit	2629.87	-2.67865	0.28081	-5.97789	2.2605e-09	3.81785e-08	2629.87	-0.100737	0.278802	0	1	1	FALSE
ACFLL8_08100		1897705	1899261	-	519	xanthine dehydrogenase small subunit	1532.39	-1.57504	0.177595	-3.23792	0.00120403	0.00814979	1532.39	-0.206317	0.175895	0	1	1	FALSE
ACFLL8_08105		1899602	1900279	+	226	TetR family transcriptional regulator C-terminal domain-containing protein	5217.38	0.874014	0.180218	0	1	1	5217.38	-0.387675	0.18084	0	1	1	FALSE
ACFLL8_08110		1900420	1900995	-	192	hypothetical protein	6736.22	-4.92969	0.360962	-10.8867	1.33353e-27	1.26613e-25	6736.22	-0.542326	0.358097	0	1	1	FALSE
ACFLL8_08115		1900992	1901348	-	119	hypothetical protein	17567.4	-5.06068	0.267277	-15.1928	3.94883e-52	1.06709e-49	17567.4	-0.560561	0.265656	0	1	1	FALSE
ACFLL8_08120		1901773	1902687	+	305	MurR/RpiR family transcriptional regulator	593.714	-2.01775	0.24259	-4.19538	2.7242e-05	0.00025935	593.714	-0.568459	0.238561	0	1	1	FALSE
ACFLL8_08125		1903321	1904175	+	285	transporter substrate-binding domain-containing protein	2156.19	-2.22858	0.403961	-3.04134	0.00235526	0.0153792	2156.19	-1.16977	0.403486	-0.420768	0.673925	1	FALSE
ACFLL8_08130		1904223	1904948	+	242	amino acid ABC transporter permease	847.743	-2.78929	0.954311	-1.87495	0.0607992	0.262393	847.743	-0.985428	0.95306	0	1	1	FALSE
ACFLL8_08135		1904945	1905598	+	218	amino acid ABC transporter permease	1137.39	-3.12531	1.19236	-1.78244	0.0746768	0.314179	1137.39	-1.10837	1.19138	-0.0909622	0.927523	1	FALSE
ACFLL8_08140		1905582	1906400	+	273	amino acid ABC transporter ATP-binding protein	1434.56	-2.54013	1.26631	-1.21623	0.223897	0.791297	1434.56	-0.948017	1.26588	0	1	1	FALSE
ACFLL8_08145		1906480	1907757	+	426	amidase family protein	2704.24	-2.1718	1.19951	-0.9769	0.328618	1	2704.24	-0.744645	1.19933	0	1	1	FALSE
ACFLL8_08150	puuE	1907871	1908824	-	318	allantoinase PuuE	1088.05	-1.76622	0.368403	-2.07986	0.0375387	0.176774	1088.05	-0.848085	0.367708	0	1	1	FALSE
ACFLL8_08155		1908945	1911767	-	941	ATP-dependent DNA helicase	296.342	-0.992023	0.253739	0	1	1	296.342	0.128478	0.24981	0	1	1	FALSE
ACFLL8_08160		1911764	1913602	-	613	VRR-NUC domain-containing protein	219.459	0.290103	0.243151	0	1	1	219.459	0.172565	0.246091	0	1	1	FALSE
ACFLL8_08165		1913894	1914616	+	241	DUF3581 family protein	1952.85	1.41513	0.242428	1.7124	0.086823	0.355489	1952.85	-0.0831644	0.243799	0	1	1	FALSE
ACFLL8_08170	selD	1914806	1917205	-	800	selenide%2C water dikinase SelD	973.458	-0.0678536	0.219195	0	1	1	973.458	0.0307056	0.219633	0	1	1	FALSE
ACFLL8_08175		1917276	1917944	+	223	DUF479 domain-containing protein	619.545	-0.113167	0.328304	0	1	1	619.545	0.662496	0.327667	0	1	1	FALSE
ACFLL8_08180		1918042	1918836	-	265	carbonic anhydrase	1095.22	-0.584615	0.262106	0	1	1	1095.22	0.378574	0.261374	0	1	1	FALSE
ACFLL8_08185	glp	1919029	1920348	-	440	gephyrin-like molybdotransferase Glp	1420.59	-1.33235	0.183539	-1.8108	0.0701722	0.296649	1420.59	0.281702	0.181477	0	1	1	FALSE
ACFLL8_08190	moaB	1920338	1920868	-	177	molybdenum cofactor biosynthesis protein B	659.77	-1.20985	0.216579	-0.968911	0.332589	1	659.77	0.193508	0.213564	0	1	1	FALSE
ACFLL8_08195		1920871	1921215	-	115	DUF1244 domain-containing protein	394.112	0.716483	0.194952	0	1	1	394.112	0.237537	0.198377	0	1	1	FALSE
ACFLL8_08200		1921438	1922484	-	349	formate dehydrogenase subunit gamma	1557.6	0.120099	0.179069	0	1	1	1557.6	0.16508	0.179454	0	1	1	FALSE
ACFLL8_08205	fdh3B	1922494	1923153	-	220	formate dehydrogenase FDH3 subunit beta	566.737	-1.22626	0.218042	-1.03767	0.299424	0.99704	566.737	-0.112936	0.215516	0	1	1	FALSE
ACFLL8_08210		1923281	1926127	-	949	molybdopterin-dependent oxidoreductase	3218.65	-1.31419	0.205357	-1.52999	0.126019	0.488152	3218.65	-0.111201	0.204817	0	1	1	FALSE
ACFLL8_08215		1926407	1926637	-	77	twin-arginine translocation pathway signal	2061.12	0.705477	0.2245	0	1	1	2061.12	0.602327	0.224806	0	1	1	FALSE
ACFLL8_08220		1926813	1927502	-	230	molecular chaperone	1039.48	-0.214413	0.20558	0	1	1	1039.48	0.157889	0.205587	0	1	1	FALSE
ACFLL8_08225		1927531	1929432	-	634	4Fe-4S dicluster domain-containing protein	1395.03	-0.947266	0.19048	0	1	1	1395.03	0.313431	0.18918	0	1	1	FALSE
ACFLL8_08230		1929872	1930735	-	288	DUF3306 domain-containing protein	407.893	-1.23948	0.206508	-1.15968	0.246178	0.85711	407.893	-0.348941	0.203878	0	1	1	FALSE
ACFLL8_08235		1930732	1931304	-	191	DUF3305 domain-containing protein	585.3	-0.55064	0.253885	0	1	1	585.3	-0.48476	0.254685	0	1	1	FALSE
ACFLL8_08240		1931640	1932539	+	300	formate dehydrogenase accessory sulfurtransferase FdhD	400.386	0.424005	0.220477	0	1	1	400.386	-0.252982	0.224512	0	1	1	FALSE
ACFLL8_08245		1932536	1933477	+	314	substrate-binding domain-containing protein	706.773	-0.95617	0.176428	0	1	1	706.773	-0.041935	0.174722	0	1	1	FALSE
ACFLL8_08250		1933624	1934256	-	211	helix-turn-helix domain-containing protein	480.058	-0.507749	0.208676	0	1	1	480.058	-0.375442	0.209587	0	1	1	FALSE
ACFLL8_08255		1934421	1935446	-	342	histone deacetylase family protein	2698.64	0.24273	0.193417	0	1	1	2698.64	-0.017518	0.193819	0	1	1	FALSE
ACFLL8_08260		1935640	1938546	+	969	bifunctional acetate--CoA ligase family protein/GNAT family N-acetyltransferase	4863.35	-0.351116	0.170218	0	1	1	4863.35	0.058018	0.170205	0	1	1	FALSE
ACFLL8_08265		1938854	1940062	+	403	glycine betaine/L-proline ABC transporter ATP-binding protein	2552.42	-1.6692	0.32648	-2.04975	0.0403892	0.188428	2552.42	-0.357377	0.325941	0	1	1	FALSE
ACFLL8_08270		1940059	1940916	+	286	ABC transporter permease	2679.67	-1.41092	0.41679	-0.985915	0.324175	1	2679.67	-0.341875	0.416513	0	1	1	FALSE
ACFLL8_08275		1941164	1942066	+	301	glycine betaine ABC transporter substrate-binding protein	1941.03	-1.48883	0.435906	-1.1214	0.262116	0.901874	1941.03	-0.847424	0.435756	0	1	1	FALSE
ACFLL8_08280		1942243	1942914	-	224	RluA family pseudouridine synthase	63.3158	0.660884	0.349543	0	1	1	63.3158	-0.247574	0.368775	0	1	1	FALSE
ACFLL8_08285		1942982	1943533	-	184	hypothetical protein	123.521	1.01077	0.301993	0.0356723	0.971544	1	123.521	0.245412	0.31136	0	1	1	FALSE
ACFLL8_08290	pdxH	1943832	1944482	-	217	pyridoxamine 5%27-phosphate oxidase	2670.22	0.706969	0.192503	0	1	1	2670.22	0.251635	0.193004	0	1	1	FALSE
ACFLL8_08295		1944555	1944953	-	133	branched-chain amino acid transporter permease	257.17	-0.390869	0.224299	0	1	1	257.17	-0.830209	0.229892	0	1	1	FALSE
ACFLL8_08300		1944950	1945783	-	278	AzlC family ABC transporter permease	433.509	0.0205302	0.28518	0	1	1	433.509	-1.00769	0.289797	-0.0265511	0.978818	1	FALSE
ACFLL8_08305		1946265	1946672	-	136	DUF2069 domain-containing protein	155.499	0.101357	0.288988	0	1	1	155.499	0.273863	0.290443	0	1	1	FALSE
ACFLL8_08310	wrbA	1946673	1947320	-	216	NAD%28P%29H:quinone oxidoreductase	212.316	0.375468	0.285331	0	1	1	212.316	-0.17363	0.29042	0	1	1	FALSE
ACFLL8_08315		1947345	1947704	-	120	ArsC/Spx/MgsR family protein	330.368	2.01192	0.243403	4.15736	3.21949e-05	0.00029842	330.368	0.184251	0.252892	0	1	1	FALSE
ACFLL8_08320		1947804	1949102	+	433	YihY family inner membrane protein	2269.9	-0.0378079	0.16712	0	1	1	2269.9	-0.349712	0.167763	0	1	1	FALSE
ACFLL8_08325	potA	1949462	1950589	+	376	spermidine/putrescine ABC transporter ATP-binding protein PotA	371.819	0.106992	0.234323	0	1	1	371.819	-0.714742	0.23949	0	1	1	FALSE
ACFLL8_08330	potB	1950586	1951467	+	294	spermidine/putrescine ABC transporter permease PotB	264.476	0.318651	0.229965	0	1	1	264.476	0.0123781	0.233601	0	1	1	FALSE
ACFLL8_08335	potC	1951464	1952246	+	261	spermidine/putrescine ABC transporter permease PotC	153.338	-0.0694838	0.220659	0	1	1	153.338	-0.884231	0.234229	0	1	1	FALSE
ACFLL8_08340		1952248	1953324	+	359	PotD/PotF family extracellular solute-binding protein	1289.7	0.385794	0.249387	0	1	1	1289.7	-0.412879	0.250675	0	1	1	FALSE
ACFLL8_08345	smrA	1953531	1954172	+	214	DNA endonuclease SmrA	1686.73	1.38938	0.283754	1.37224	0.169988	0.627939	1686.73	0.451909	0.284587	0	1	1	FALSE
ACFLL8_08350		1954341	1954868	-	176	hypothetical protein	485.748	-0.939133	0.227981	0	1	1	485.748	0.467562	0.224332	0	1	1	FALSE
ACFLL8_08355		1955136	1957157	+	674	BCCT family transporter	525.765	1.76768	0.247111	3.10663	0.00189235	0.0125195	525.765	-0.23227	0.25404	0	1	1	FALSE
ACFLL8_08360		1957596	1959329	+	578	BCCT family transporter	288.07	0.237336	0.264428	0	1	1	288.07	0.0581992	0.266793	0	1	1	FALSE
ACFLL8_08365		1959979	1961646	+	556	AMP-binding protein	1228.5	-0.743561	0.249414	0	1	1	1228.5	-0.129312	0.249119	0	1	1	FALSE
ACFLL8_08370		1961815	1963062	-	416	dicarboxylate/amino acid:cation symporter	787.291	2.59085	0.275678	5.7707	7.89442e-09	1.23258e-07	787.291	0.584308	0.27953	0	1	1	FALSE
ACFLL8_08375		1963831	1965033	+	401	thiamine pyrophosphate-dependent dehydrogenase E1 component subunit alpha	806.346	-0.763847	0.266924	0	1	1	806.346	-0.0457111	0.266323	0	1	1	FALSE
ACFLL8_08380		1965117	1966085	+	323	alpha-ketoacid dehydrogenase subunit beta	525.257	-0.358003	0.31102	0	1	1	525.257	0.190733	0.310656	0	1	1	FALSE
ACFLL8_08385		1966232	1967950	+	573	dihydrolipoyllysine-residue acetyltransferase	426.596	-0.112267	0.269694	0	1	1	426.596	0.190161	0.269907	0	1	1	FALSE
ACFLL8_08390		1967979	1969928	+	650	serine/threonine protein kinase	267.993	-0.23378	0.236322	0	1	1	267.993	-0.0009201	0.237103	0	1	1	FALSE
ACFLL8_08395		1970128	1971582	-	485	aspartate ammonia-lyase	1360.89	4.07447	0.33481	9.18273	4.20289e-20	1.99524e-18	1360.89	0.363941	0.34039	0	1	1	FALSE
ACFLL8_08400		1971848	1972780	+	311	LysR substrate-binding domain-containing protein	755.531	1.51633	0.283409	1.82187	0.0684741	0.290168	755.531	-0.202541	0.286953	0	1	1	FALSE
ACFLL8_08405		1972860	1973987	-	376	bifunctional nicotinamide-nucleotide adenylyltransferase/Nudix hydroxylase	527.43	0.0415717	0.194999	0	1	1	527.43	-0.146313	0.196861	0	1	1	FALSE
ACFLL8_08410		1974375	1975328	-	318	nucleoside hydrolase	349.89	0.108255	0.225326	0	1	1	349.89	0.0795498	0.227006	0	1	1	FALSE
ACFLL8_08415		1975448	1976368	-	307	ribokinase	819.505	1.30767	0.194856	1.57894	0.11435	0.452816	819.505	0.327345	0.197475	0	1	1	FALSE
ACFLL8_08420		1976539	1978470	+	644	hypothetical protein	2138.77	-1.23247	0.31607	-0.735496	0.462037	1	2138.77	-0.671048	0.315948	0	1	1	FALSE
ACFLL8_08425		1978648	1979667	-	340	D-2-hydroxyacid dehydrogenase	1402.49	0.694026	0.202853	0	1	1	1402.49	0.131513	0.203895	0	1	1	FALSE
ACFLL8_08430		1979982	1980206	+	75	FmdB family zinc ribbon protein	1931.13	3.8007	0.331282	8.45413	2.81185e-17	1.02896e-15	1931.13	0.484806	0.334353	0	1	1	FALSE
ACFLL8_08435	aspS	1980350	1982137	+	596	aspartate--tRNA ligase	2177.18	1.32534	0.24306	1.33852	0.180726	0.664112	2177.18	-0.0083244	0.244146	0	1	1	FALSE
ACFLL8_08440	ruvC	1982387	1982965	+	193	crossover junction endodeoxyribonuclease RuvC	339.167	0.17568	0.215504	0	1	1	339.167	-0.256337	0.219279	0	1	1	FALSE
ACFLL8_08445	ruvA	1983374	1983988	+	205	Holliday junction branch migration protein RuvA	767.696	0.511912	0.19492	0	1	1	767.696	-0.0152424	0.196877	0	1	1	FALSE
ACFLL8_08450	ruvB	1984193	1985236	+	348	Holliday junction branch migration DNA helicase RuvB	1065.68	0.0924521	0.171381	0	1	1	1065.68	-0.206375	0.172645	0	1	1	FALSE
ACFLL8_08455	ybgC	1985236	1985682	+	149	tol-pal system-associated acyl-CoA thioesterase	523.014	0.550976	0.211408	0	1	1	523.014	-0.275155	0.215107	0	1	1	FALSE
ACFLL8_08460	tolQ	1985861	1986538	+	226	protein TolQ	1060.59	-0.095696	0.167075	0	1	1	1060.59	0.00325943	0.167604	0	1	1	FALSE
ACFLL8_08465	tolR	1986553	1986999	+	149	protein TolR	382.853	-0.504232	0.225183	0	1	1	382.853	0.121833	0.224152	0	1	1	FALSE
ACFLL8_08470	tolA	1987003	1988190	+	396	cell envelope integrity protein TolA	2048.02	0.33798	0.199746	0	1	1	2048.02	0.361979	0.200013	0	1	1	FALSE
ACFLL8_08475	tolB	1988187	1989479	+	431	Tol-Pal system beta propeller repeat protein TolB	5734.13	-0.210053	0.16852	0	1	1	5734.13	0.239288	0.168495	0	1	1	FALSE
ACFLL8_08480	pal	1989550	1990059	+	170	peptidoglycan-associated lipoprotein Pal	14818	0.279825	0.2758	0	1	1	14818	0.277291	0.275829	0	1	1	FALSE
ACFLL8_08485	ybgF	1990198	1990968	+	257	tol-pal system protein YbgF	3269.65	-0.218758	0.188883	0	1	1	3269.65	0.0553928	0.188939	0	1	1	FALSE
ACFLL8_08490		1991120	1991884	+	255	YciK family oxidoreductase	724.488	-0.104095	0.178029	0	1	1	724.488	0.3801	0.177756	0	1	1	FALSE
ACFLL8_08495		1992021	1992707	-	229	HAD-IA family hydrolase	402.778	0.529825	0.188455	0	1	1	402.778	0.120885	0.191715	0	1	1	FALSE
ACFLL8_08500	ubiG	1992704	1993420	-	239	bifunctional 2-polyprenyl-6-hydroxyphenol methylase/3-demethylubiquinol 3-O-methyltransferase UbiG	425.11	0.549255	0.215868	0	1	1	425.11	0.141063	0.218558	0	1	1	FALSE
ACFLL8_08505	mtnA	1993692	1994810	+	373	S-methyl-5-thioribose-1-phosphate isomerase	767.575	1.25423	0.195305	1.30168	0.193025	0.702692	767.575	0.366792	0.197873	0	1	1	FALSE
ACFLL8_08510	galU	1995042	1995926	+	295	UTP--glucose-1-phosphate uridylyltransferase GalU	3278.52	-0.479448	0.207666	0	1	1	3278.52	-0.408395	0.207834	0	1	1	FALSE
ACFLL8_08515		1995930	1997216	+	429	nucleotide sugar dehydrogenase	4793.43	-0.17032	0.195229	0	1	1	4793.43	-0.161055	0.195366	0	1	1	FALSE
ACFLL8_08520		1997320	1998444	-	375	alcohol dehydrogenase family protein	355.698	0.68014	0.216983	0	1	1	355.698	0.0993426	0.220893	0	1	1	FALSE
ACFLL8_08525		1998706	1999290	-	195	superoxide dismutase	4959.4	-1.0585	0.254377	-0.229968	0.818117	1	4959.4	-0.495835	0.254315	0	1	1	FALSE
ACFLL8_08530		1999897	2001039	+	381	hypothetical protein	1128.66	-0.120841	0.202146	0	1	1	1128.66	0.216806	0.202203	0	1	1	FALSE
ACFLL8_08535		2001227	2003281	+	685	autotransporter assembly complex family protein	1388.06	0.290517	0.18057	0	1	1	1388.06	0.170823	0.181202	0	1	1	FALSE
ACFLL8_08540		2003442	2007611	+	1390	translocation/assembly module TamB domain-containing protein	2997.5	0.100348	0.161654	0	1	1	2997.5	0.0802544	0.161923	0	1	1	FALSE
ACFLL8_08545		2007764	2008240	-	159	YchJ family protein	303.448	1.52687	0.273647	1.92537	0.0541835	0.240945	303.448	0.890583	0.277067	0	1	1	FALSE
ACFLL8_08550	msrA	2008290	2008928	+	213	peptide-methionine %28S%29-S-oxide reductase MsrA	1963.64	1.66363	0.309302	2.14558	0.0319062	0.153485	1963.64	-0.131725	0.310607	0	1	1	FALSE
ACFLL8_08555		2009077	2010333	-	419	MFS transporter	282.927	-0.417857	0.239083	0	1	1	282.927	0.282057	0.237421	0	1	1	FALSE
ACFLL8_08560		2010524	2011690	-	389	dicarboxylate/amino acid:cation symporter	249.008	1.1294	0.271944	0.475823	0.6342	1	249.008	0.183248	0.278055	0	1	1	FALSE
ACFLL8_08565		2011934	2012992	-	353	hydrolase	697.831	0.104812	0.187311	0	1	1	697.831	-0.0248246	0.188596	0	1	1	FALSE
ACFLL8_08570	pepQ	2013181	2014545	-	455	Xaa-Pro dipeptidase	699.936	-0.0845117	0.231489	0	1	1	699.936	0.0877114	0.231911	0	1	1	FALSE
ACFLL8_08575		2014599	2015525	-	309	LysR family transcriptional regulator	564.906	0.391838	0.179926	0	1	1	564.906	-0.0542654	0.182569	0	1	1	FALSE
ACFLL8_08580		2015905	2016972	-	356	ABC transporter ATP-binding protein	300.237	-0.176059	0.296334	0	1	1	300.237	0.160208	0.296486	0	1	1	FALSE
ACFLL8_08585		2016969	2018000	-	344	ABC transporter ATP-binding protein	250.396	-0.330238	0.260905	0	1	1	250.396	0.307697	0.259539	0	1	1	FALSE
ACFLL8_08590		2018021	2019001	-	327	ABC transporter permease	404.543	-0.0639454	0.266869	0	1	1	404.543	0.320521	0.266845	0	1	1	FALSE
ACFLL8_08595		2018998	2020044	-	349	ABC transporter permease	386.921	0.216134	0.203237	0	1	1	386.921	0.132443	0.205117	0	1	1	FALSE
ACFLL8_08600		2020369	2021964	-	532	ABC transporter substrate-binding protein	2836.66	-0.164612	0.178442	0	1	1	2836.66	0.141648	0.178488	0	1	1	FALSE
ACFLL8_08605	can	2022698	2023354	-	219	carbonate dehydratase	2181.96	-1.39196	0.25725	-1.52365	0.127595	0.493586	2181.96	-0.951836	0.257196	0	1	1	FALSE
ACFLL8_08610	gorA	2023633	2025021	+	463	glutathione-disulfide reductase	2585.9	0.388291	0.255169	0	1	1	2585.9	0.26592	0.255406	0	1	1	FALSE
ACFLL8_08615		2025427	2026410	+	328	TAXI family TRAP transporter solute-binding subunit	6110.15	-0.485614	0.212743	0	1	1	6110.15	-0.460994	0.212846	0	1	1	FALSE
ACFLL8_08620		2026873	2029455	+	861	TRAP transporter permease	8015.29	-1.81215	0.20049	-4.05081	5.10404e-05	0.00045625	8015.29	-0.412683	0.20017	0	1	1	FALSE
ACFLL8_08625		2029863	2031263	+	467	PhoH family protein	20028	-3.6941	0.204492	-13.1746	1.22936e-39	2.27303e-37	20028	-0.804853	0.203884	0	1	1	FALSE
ACFLL8_08630		2031407	2032372	-	322	DNA-binding protein	5300.18	1.41934	0.205157	2.04401	0.0409528	0.189548	5300.18	0.079044	0.205682	0	1	1	FALSE
ACFLL8_08635		2032701	2033969	+	423	tyrosine-type recombinase/integrase	1296.98	-0.307369	0.180798	0	1	1	1296.98	-0.62657	0.181927	0	1	1	FALSE
ACFLL8_08640		2034082	2034513	+	144	SufE family protein	954.643	0.003098	0.198906	0	1	1	954.643	-0.286742	0.20013	0	1	1	FALSE
ACFLL8_08645		2034670	2035380	-	237	RES family NAD%2B phosphorylase	1253.8	-0.554088	0.19142	0	1	1	1253.8	-0.299909	0.19161	0	1	1	FALSE
ACFLL8_08650		2035377	2035778	-	134	antitoxin Xre-like helix-turn-helix domain-containing protein	879.669	-0.733668	0.188671	0	1	1	879.669	-0.307695	0.188556	0	1	1	FALSE
ACFLL8_08655	yidD	2035891	2036166	-	92	membrane protein insertion efficiency factor YidD	154.311	-0.503632	0.265551	0	1	1	154.311	-0.351432	0.267589	0	1	1	FALSE
ACFLL8_08660	hisI	2036234	2036680	-	149	phosphoribosyl-AMP cyclohydrolase	514.694	1.38316	0.36617	1.04639	0.295379	0.984502	514.694	-0.33902	0.370294	0	1	1	FALSE
ACFLL8_08665		2036804	2037628	-	275	metal ABC transporter permease	412.242	-0.0398293	0.382978	0	1	1	412.242	-0.14728	0.384029	0	1	1	FALSE
ACFLL8_08670		2037707	2038537	-	277	metal ABC transporter ATP-binding protein	507.349	0.651505	0.448943	0	1	1	507.349	-0.29092	0.450937	0	1	1	FALSE
ACFLL8_08675		2038650	2039792	-	381	metal ABC transporter solute-binding protein%2C Zn/Mn family	1182.07	1.45402	0.963581	0.471177	0.637515	1	1182.07	-0.330354	0.964293	0	1	1	FALSE
ACFLL8_08680		2039870	2041207	-	446	dihydroorotase	2644.99	-1.16127	0.437992	-0.368194	0.712729	1	2644.99	-0.79761	0.437997	0	1	1	FALSE
ACFLL8_08685		2041267	2041734	-	156	Fur family transcriptional regulator	701.5	-0.797015	0.170816	0	1	1	701.5	-0.742118	0.171923	0	1	1	FALSE
ACFLL8_08690		2042070	2042726	+	219	DUF1826 domain-containing protein	284.932	2.75111	1.42343	1.23021	0.21862	0.775769	284.932	-0.281186	1.42768	0	1	1	FALSE
ACFLL8_08695		2042801	2043817	-	339	alpha-L-glutamate ligase-like protein	1743.62	-0.341127	0.172359	0	1	1	1743.62	-0.277388	0.172735	0	1	1	FALSE
ACFLL8_08700		2043819	2045381	-	521	inactive transglutaminase family protein	1070.41	-0.391102	0.215237	0	1	1	1070.41	-0.560051	0.216136	0	1	1	FALSE
ACFLL8_08705		2045481	2046311	-	277	ATP-dependent zinc protease	1060.06	-0.039419	0.221876	0	1	1	1060.06	-0.249127	0.222744	0	1	1	FALSE
ACFLL8_08710		2047194	2047760	+	189	DUF3833 domain-containing protein	4092.64	-1.82983	0.210662	-3.93916	8.17673e-05	0.00069721	4092.64	0.0863198	0.209765	0	1	1	FALSE
ACFLL8_08715		2047757	2049577	-	607	EAL domain-containing protein	6978.06	-1.87511	0.255432	-3.42601	0.00061251	0.00436458	6978.06	-0.223297	0.255069	0	1	1	FALSE
ACFLL8_08735		2053000	2054805	-	602	diguanylate cyclase domain-containing protein	3235.66	0.667694	0.200719	0	1	1	3235.66	-0.433055	0.20153	0	1	1	FALSE
ACFLL8_08740	nfuA	2055069	2055659	-	197	Fe-S biogenesis protein NfuA	1795.49	1.88949	0.259368	3.42946	0.00060479	0.00431838	1795.49	0.0407662	0.261086	0	1	1	FALSE
ACFLL8_08745	metH	2056020	2059748	+	1243	methionine synthase	4794.53	0.241425	0.190022	0	1	1	4794.53	-0.0693097	0.190273	0	1	1	FALSE
ACFLL8_08750		2060067	2061395	+	443	MATE family efflux transporter	720.881	0.258109	0.224153	0	1	1	720.881	0.00531852	0.225427	0	1	1	FALSE
ACFLL8_08755		2061804	2062892	+	363	ABC transporter substrate-binding protein	246.836	-2.42222	0.311721	-4.56247	5.05551e-06	5.41464e-05	246.836	-0.645375	0.30038	0	1	1	FALSE
ACFLL8_08760		2063110	2064255	+	382	ABC transporter substrate-binding protein	456.173	-0.641658	0.232904	0	1	1	456.173	-0.136572	0.232453	0	1	1	FALSE
ACFLL8_08765		2064245	2066743	+	833	putative bifunctional diguanylate cyclase/phosphodiesterase	790.059	-0.497222	0.257754	0	1	1	790.059	-0.396237	0.258262	0	1	1	FALSE
ACFLL8_08770		2066976	2068628	+	551	nitrite/sulfite reductase	3558.55	0.998611	0.272818	0	1	1	3558.55	-0.477027	0.273523	0	1	1	FALSE
ACFLL8_08775		2068621	2069175	+	185	DUF934 domain-containing protein	3743.85	-0.610196	0.296481	0	1	1	3743.85	-0.710088	0.296653	0	1	1	FALSE
ACFLL8_08780		2069315	2069488	-	58	DUF2970 domain-containing protein	19955.9	-1.86187	0.232187	-3.71198	0.00020564	0.00160181	19955.9	-0.134269	0.232039	0	1	1	FALSE
ACFLL8_08785		2069718	2070077	+	120	hypothetical protein	6708.4	-1.17219	0.209498	-0.821908	0.411129	1	6708.4	0.0814879	0.20924	0	1	1	FALSE
ACFLL8_08790		2070233	2070514	-	94	hypothetical protein	1653.58	-1.65195	0.202603	-3.21787	0.00129148	0.00866312	1653.58	-0.472498	0.201447	0	1	1	FALSE
ACFLL8_08795		2070913	2073156	+	748	cache domain-containing protein	2364.86	-1.4033	0.244789	-1.64753	0.0994487	0.398362	2364.86	-0.761264	0.244575	0	1	1	FALSE
ACFLL8_08800		2073475	2074230	+	252	FadR/GntR family transcriptional regulator	183.091	2.16827	0.249484	4.68276	2.83044e-06	3.16666e-05	183.091	0.0978809	0.268791	0	1	1	FALSE
ACFLL8_08805	dgoD	2074297	2075445	+	383	galactonate dehydratase	211.22	1.27602	0.217809	1.26727	0.20506	0.736313	211.22	-0.345286	0.233203	0	1	1	FALSE
ACFLL8_08810		2075542	2076339	+	266	SDR family NAD%28P%29-dependent oxidoreductase	191.309	0.338975	0.226829	0	1	1	191.309	-0.150477	0.233419	0	1	1	FALSE
ACFLL8_08815		2076336	2077331	+	332	2-dehydro-3-deoxygalactonokinase	106.039	-0.20282	0.257782	0	1	1	106.039	0.0434603	0.25941	0	1	1	FALSE
ACFLL8_08820		2077360	2077974	+	205	2-dehydro-3-deoxy-6-phosphogalactonate aldolase	104.435	0.719254	0.26429	0	1	1	104.435	0.168666	0.274626	0	1	1	FALSE
ACFLL8_08825		2078015	2078971	+	319	SMP-30/gluconolactonase/LRE family protein	80.6418	-0.356762	0.317054	0	1	1	80.6418	-0.0128203	0.317509	0	1	1	FALSE
ACFLL8_08830		2079016	2081244	+	743	alpha-galactosidase	379.921	-0.0087219	0.24622	0	1	1	379.921	0.0550423	0.247332	0	1	1	FALSE
ACFLL8_08835		2081289	2083277	+	663	beta-galactosidase	570.554	-0.626778	0.208994	0	1	1	570.554	-0.288627	0.209116	0	1	1	FALSE
ACFLL8_08840		2083834	2085219	+	462	GntP family permease	760.278	0.610093	0.262792	0	1	1	760.278	-0.281185	0.264965	0	1	1	FALSE
ACFLL8_08845		2085341	2085661	-	107	hypothetical protein	5317.32	-0.871592	0.29158	0	1	1	5317.32	0.199864	0.291408	0	1	1	FALSE
ACFLL8_08850		2085817	2088045	-	743	FUSC family protein	1582.95	-0.0672775	0.32973	0	1	1	1582.95	-0.168227	0.330046	0	1	1	FALSE
ACFLL8_08855		2088049	2088966	-	306	efflux RND transporter periplasmic adaptor subunit	894.867	0.0317478	0.288614	0	1	1	894.867	-0.17808	0.289392	0	1	1	FALSE
ACFLL8_08860		2089187	2089426	-	80	DUF1656 domain-containing protein	452.653	0.24387	0.244002	0	1	1	452.653	-0.243512	0.246666	0	1	1	FALSE
ACFLL8_08865		2089814	2091109	-	432	TRAP transporter large permease	342.108	2.25968	0.299565	4.20504	2.61037e-05	0.00024987	342.108	-0.0965457	0.31029	0	1	1	FALSE
ACFLL8_08870		2091099	2091605	-	169	TRAP transporter small permease	115.807	1.05706	0.247073	0.230926	0.817373	1	115.807	-0.135531	0.264982	0	1	1	FALSE
ACFLL8_08875		2091824	2092813	-	330	DctP family TRAP transporter solute-binding subunit	942.803	1.87669	0.344518	2.5447	0.0109371	0.0606027	942.803	-0.641051	0.34854	0	1	1	FALSE
ACFLL8_08880		2093558	2095159	+	534	MFS transporter	379.34	2.33089	0.219622	6.05991	1.36201e-09	2.36869e-08	379.34	0.0140269	0.232209	0	1	1	FALSE
ACFLL8_08885		2095360	2096106	-	249	RNA polymerase sigma factor FliA	495.516	3.60718	0.291522	8.94336	3.77503e-19	1.70021e-17	495.516	1.48885	0.297406	1.64372	0.100234	1	FALSE
ACFLL8_08890		2096568	2097863	+	432	FliC/FljB family flagellin	23100.5	2.9709	0.374132	5.26791	1.37988e-07	1.85729e-06	23100.5	-0.29848	0.374364	0	1	1	FALSE
ACFLL8_08895	fliE	2098070	2098429	-	120	flagellar hook-basal body complex protein FliE	486.339	4.80976	0.343796	11.0815	1.54339e-28	1.59469e-26	486.339	1.117	0.358309	0.32652	0.744031	1	FALSE
ACFLL8_08900	fliF	2098679	2100436	+	586	flagellar basal-body MS-ring/collar protein FliF	624.677	2.85328	0.24888	7.44649	9.58529e-14	2.49431e-12	624.677	0.567542	0.255295	0	1	1	FALSE
ACFLL8_08905	fliG	2100429	2101427	+	333	flagellar motor switch protein FliG	469.843	3.31475	0.300433	7.7047	1.31149e-14	3.71554e-13	469.843	0.698062	0.309102	0	1	1	FALSE
ACFLL8_08910		2101420	2102310	+	297	FliH/SctL family protein	291.889	2.07865	0.244954	4.40348	1.06528e-05	0.00010911	291.889	0.794335	0.251883	0	1	1	FALSE
ACFLL8_08915	fliI	2102307	2103665	+	453	flagellar protein export ATPase FliI	361.21	2.39277	0.326254	4.26899	1.96363e-05	0.00019215	361.21	0.625017	0.332276	0	1	1	FALSE
ACFLL8_08920	fliJ	2103721	2104170	+	150	flagellar export protein FliJ	81.017	2.62603	0.34843	4.66674	3.06019e-06	3.40204e-05	81.017	0.946455	0.370954	0	1	1	FALSE
ACFLL8_08925		2104229	2105641	+	471	flagellar hook-length control protein FliK	237.988	1.01019	0.28927	0.0352215	0.971903	1	237.988	0.15862	0.294856	0	1	1	FALSE
ACFLL8_08930		2105823	2106311	+	163	flagellar basal body-associated FliL family protein	208.832	2.1168	0.255817	4.36561	1.26767e-05	0.00012871	208.832	1.18224	0.262582	0.694016	0.487672	1	FALSE
ACFLL8_08935	fliM	2106318	2107328	+	337	flagellar motor switch protein FliM	208.104	2.36251	0.26212	5.19805	2.01389e-07	2.64974e-06	208.104	1.151	0.270424	0.558393	0.576576	1	FALSE
ACFLL8_08940	fliN	2107321	2107812	+	164	flagellar motor switch protein FliN	274.064	2.92805	0.361821	5.32874	9.88966e-08	1.3466e-06	274.064	1.12464	0.368878	0.337882	0.735452	1	FALSE
ACFLL8_08945	fliO	2107825	2108385	+	187	flagellar biosynthetic protein FliO	189.336	1.51939	0.27508	1.88814	0.0590068	0.256231	189.336	1.21357	0.278591	0.766601	0.443319	1	FALSE
ACFLL8_08950	fliP	2108466	2109164	+	233	flagellar type III secretion system pore protein FliP	305.315	1.31735	0.283495	1.11942	0.262959	0.90389	305.315	0.588609	0.287235	0	1	1	FALSE
ACFLL8_08955	fliQ	2109297	2109566	+	90	flagellar biosynthesis protein FliQ	214.018	2.27872	0.252466	5.06491	4.0859e-07	5.12634e-06	214.018	1.11694	0.260553	0.448832	0.653553	1	FALSE
ACFLL8_08960	fliR	2109580	2110371	+	264	flagellar biosynthetic protein FliR	322.17	0.963182	0.272833	0	1	1	322.17	0.746761	0.274763	0	1	1	FALSE
ACFLL8_08965	flgL	2110373	2111626	-	418	flagellar hook-associated protein FlgL	1342.82	2.43091	0.250203	5.71898	1.07164e-08	1.64395e-07	1342.82	1.06728	0.251746	0.267247	0.789279	1	FALSE
ACFLL8_08970	flgK	2111637	2113280	-	548	flagellar hook-associated protein FlgK	1765.25	2.98797	0.235083	8.45647	2.75591e-17	1.0191e-15	1765.25	1.27714	0.23666	1.17104	0.241581	1	FALSE
ACFLL8_09010	flgC	2120611	2121099	-	163	flagellar basal body rod protein FlgC	359.411	2.91617	0.299761	6.39234	1.63371e-10	3.08561e-09	359.411	1.71375	0.303812	2.34931	0.0188085	1	FALSE
ACFLL8_09015	flgB	2121099	2121521	-	141	flagellar basal body rod protein FlgB	417.487	3.88199	0.371957	7.74818	9.32223e-15	2.72908e-13	417.487	1.95716	0.37668	2.54105	0.011052	0.718993	FALSE
ACFLL8_09020	flgA	2121856	2122632	+	259	flagellar basal body P-ring formation chaperone FlgA	371.233	0.919916	0.22402	0	1	1	371.233	0.230983	0.227967	0	1	1	FALSE
ACFLL8_09025	flgM	2122831	2123103	+	91	flagellar biosynthesis anti-sigma factor FlgM	398.744	1.80734	0.243233	3.3192	0.00090276	0.00625523	398.744	0.240355	0.249864	0	1	1	FALSE
ACFLL8_09030		2123100	2123573	+	158	flagella synthesis protein FlgN	161.505	0.659805	0.228546	0	1	1	161.505	0.100049	0.236464	0	1	1	FALSE
ACFLL8_09035		2123778	2124284	-	169	flagellar protein FlhE	297.091	2.49512	0.23632	6.32669	2.50479e-10	4.6805e-09	297.091	0.441534	0.248505	0	1	1	FALSE
ACFLL8_09040	flhA	2124355	2126451	-	699	flagellar biosynthesis protein FlhA	993.204	2.32436	0.216757	6.10986	9.97161e-10	1.76032e-08	993.204	0.484259	0.220265	0	1	1	FALSE
ACFLL8_09045	flhB	2126448	2127776	-	443	flagellar biosynthesis protein FlhB	2315.57	2.26298	0.216501	5.83362	5.4238e-09	8.70037e-08	2315.57	0.582853	0.21785	0	1	1	FALSE
ACFLL8_09050	cheZ	2127905	2128606	-	234	protein phosphatase CheZ	501.173	1.98096	0.252767	3.88087	0.00010408	0.0008644	501.173	-0.245395	0.260926	0	1	1	FALSE
ACFLL8_09055	cheY	2128653	2129042	-	130	chemotaxis response regulator CheY	1371.05	4.7629	0.336709	11.1755	5.37362e-29	5.89923e-27	1371.05	0.249862	0.346041	0	1	1	FALSE
ACFLL8_09060		2129237	2130529	-	431	chemotaxis response regulator protein-glutamate methylesterase	369.628	1.38267	0.229049	1.67069	0.094783	0.384052	369.628	-0.121316	0.236677	0	1	1	FALSE
ACFLL8_09065		2130690	2131556	-	289	CheR family methyltransferase	362.972	2.62679	0.220295	7.3846	1.5291e-13	3.92096e-12	362.972	0.235022	0.233741	0	1	1	FALSE
ACFLL8_09070		2131634	2133442	-	603	methyl-accepting chemotaxis protein	2521.48	3.2418	0.236301	9.48707	2.3761e-21	1.22753e-19	2521.48	0.0816868	0.23934	0	1	1	FALSE
ACFLL8_09075		2133676	2134209	-	178	chemotaxis protein CheW	287.424	2.00047	0.253516	3.94636	7.93478e-05	0.00067822	287.424	0.134241	0.264301	0	1	1	FALSE
ACFLL8_09080	cheA	2134264	2136426	-	721	chemotaxis protein CheA	1969.36	1.63455	0.181467	3.49679	0.0004709	0.00344637	1969.36	-0.207046	0.183762	0	1	1	FALSE
ACFLL8_09085	motB	2136527	2137468	-	314	flagellar motor protein MotB	1353.15	2.33812	0.250127	5.34977	8.8064e-08	1.20847e-06	1353.15	-0.172497	0.253764	0	1	1	FALSE
ACFLL8_09090	motA	2137522	2138391	-	290	flagellar motor stator protein MotA	4665.92	1.40411	0.317569	1.27251	0.203193	0.735137	4665.92	0.00160369	0.317975	0	1	1	FALSE
ACFLL8_09095	flhC	2138626	2139189	-	188	flagellar transcriptional regulator FlhC	1647.13	-0.359954	0.173861	0	1	1	1647.13	-0.0368762	0.173927	0	1	1	FALSE
ACFLL8_09100	flhD	2139186	2139518	-	111	flagellar transcriptional regulator FlhD	7326.35	0.350312	0.178068	0	1	1	7326.35	0.147519	0.17821	0	1	1	FALSE
ACFLL8_09105		2140303	2141862	-	520	hypothetical protein	1582.18	0.00316113	0.221824	0	1	1	1582.18	0.0695401	0.222117	0	1	1	FALSE
ACFLL8_09110		2141971	2142321	-	117	flagellar protein FliT	777.967	1.86984	0.267341	3.25367	0.00113924	0.0077411	777.967	0.426361	0.270145	0	1	1	FALSE
ACFLL8_09115	fliS	2142318	2142719	-	134	flagellar export chaperone FliS	1485.52	3.85033	0.276675	10.3021	6.89528e-25	4.48576e-23	1485.52	0.688166	0.280949	0	1	1	FALSE
ACFLL8_09120	fliD	2142810	2144246	-	479	flagellar filament capping protein FliD	4856.08	3.05152	0.284331	7.21524	5.38386e-13	1.31344e-11	4856.08	0.591474	0.285148	0	1	1	FALSE
ACFLL8_09125	rbsD	2144586	2145005	+	140	D-ribose pyranase	156.113	-1.20114	0.277094	-0.725905	0.467897	1	156.113	0.295989	0.266129	0	1	1	FALSE
ACFLL8_09130		2145005	2146645	+	547	sugar ABC transporter ATP-binding protein	486.109	-1.03486	0.245903	-0.141762	0.887268	1	486.109	0.0827389	0.243416	0	1	1	FALSE
ACFLL8_09135	rbsC	2146645	2147622	+	326	ribose ABC transporter permease	229.253	-0.686013	0.341348	0	1	1	229.253	-0.493528	0.342267	0	1	1	FALSE
ACFLL8_09140	rbsB	2147777	2148670	+	298	ribose ABC transporter substrate-binding protein RbsB	2096.11	2.31571	0.932503	1.41094	0.158261	0.592089	2096.11	-0.198386	0.933141	0	1	1	FALSE
ACFLL8_09145		2148859	2149884	+	342	LacI family DNA-binding transcriptional regulator	89.1651	-0.556146	0.312565	0	1	1	89.1651	0.0925601	0.309046	0	1	1	FALSE
ACFLL8_09150		2150023	2151243	+	407	MFS transporter	183.01	0.437023	0.241647	0	1	1	183.01	0.267478	0.24547	0	1	1	FALSE
ACFLL8_09155		2151470	2152675	+	402	dicarboxylate/amino acid:cation symporter	99.179	2.29369	0.336935	3.8396	0.00012323	0.0010115	99.179	0.762882	0.354468	0	1	1	FALSE
ACFLL8_09160		2152924	2153958	+	345	hypothetical protein	210.763	1.1027	0.274027	0.374793	0.707814	1	210.763	-0.604693	0.287689	0	1	1	FALSE
ACFLL8_09165		2154105	2154644	-	180	hypothetical protein	2342.02	2.50405	0.251437	5.98182	2.20661e-09	3.74485e-08	2342.02	0.158246	0.253273	0	1	1	FALSE
ACFLL8_09170		2154964	2156505	-	514	c-type cytochrome	3897.03	-1.18702	0.201781	-0.926851	0.354004	1	3897.03	-0.0435832	0.201374	0	1	1	FALSE
ACFLL8_09175		2156508	2158121	-	538	GMC family oxidoreductase	1805.65	-0.489181	0.251155	0	1	1	1805.65	-0.437984	0.251426	0	1	1	FALSE
ACFLL8_09180		2158231	2158815	-	195	sugar dehydrogenase complex small subunit	425.883	-1.16554	0.265383	-0.623791	0.532765	1	425.883	-0.815356	0.265487	0	1	1	FALSE
ACFLL8_09185		2159135	2159677	+	181	carboxypeptidase regulatory-like domain-containing protein	336.812	0.565341	0.299271	0	1	1	336.812	-0.184441	0.303006	0	1	1	FALSE
ACFLL8_09190		2159752	2160483	+	244	helix-turn-helix domain-containing protein	233.642	0.0486907	0.241253	0	1	1	233.642	0.0968672	0.243165	0	1	1	FALSE
ACFLL8_09195		2160660	2161880	+	407	DMT family transporter	127.102	1.51512	0.311497	1.65368	0.0981927	0.394681	127.102	1.46637	0.314316	1.48376	0.137871	1	FALSE
ACFLL8_09200		2162081	2163067	+	329	DMT family transporter	84.3659	1.31869	0.298421	1.06792	0.285557	0.962726	84.3659	1.28479	0.302773	0.940601	0.346909	1	FALSE
ACFLL8_09205		2163185	2163514	-	110	HigA family addiction module antitoxin	110.941	1.26223	0.262455	0.999134	0.31773	1	110.941	0.073028	0.279509	0	1	1	FALSE
ACFLL8_09210		2163529	2163822	-	98	type II toxin-antitoxin system RelE/ParE family toxin	155.72	0.571005	0.283798	0	1	1	155.72	-0.0779163	0.291337	0	1	1	FALSE
ACFLL8_09215	codB	2163977	2165278	-	434	cytosine permease	1645.27	-1.77542	0.207335	-3.73992	0.00018408	0.00144666	1645.27	-0.0444499	0.205375	0	1	1	FALSE
ACFLL8_09220		2165827	2168277	-	817	FdhF/YdeP family oxidoreductase	1585.82	-1.57301	0.254856	-2.24837	0.0245529	0.121314	1585.82	-0.212361	0.253723	0	1	1	FALSE
ACFLL8_09225		2168619	2169059	+	147	hemerythrin domain-containing protein	4010.53	-0.0579268	0.309298	0	1	1	4010.53	-0.185879	0.309439	0	1	1	FALSE
ACFLL8_09230		2169320	2170000	-	227	spermidine synthase	490.525	0.470245	0.252052	0	1	1	490.525	0.306822	0.253403	0	1	1	FALSE
ACFLL8_09235		2170659	2171018	+	120	hypothetical protein	1238.15	0.544711	0.203071	0	1	1	1238.15	0.480074	0.2036	0	1	1	FALSE
ACFLL8_09240		2171241	2172095	+	285	SDR family oxidoreductase	613.788	-1.65016	0.224416	-2.89712	0.00376607	0.0232516	613.788	-0.501773	0.221704	0	1	1	FALSE
ACFLL8_09245		2172429	2173451	+	341	patatin-like phospholipase family protein	244.223	-1.04693	0.232846	-0.201558	0.840263	1	244.223	0.251341	0.226295	0	1	1	FALSE
ACFLL8_09250		2173541	2174749	+	403	hypothetical protein	381.078	-0.292162	0.195862	0	1	1	381.078	0.221843	0.195235	0	1	1	FALSE
ACFLL8_09255		2174830	2176296	-	489	PLP-dependent aminotransferase family protein	798.649	0.112379	0.219127	0	1	1	798.649	0.351495	0.219377	0	1	1	FALSE
ACFLL8_09260		2176713	2178137	+	475	APC family permease	597.21	-2.06056	0.29395	-3.60796	0.00030861	0.00230669	597.21	0.200691	0.288054	0	1	1	FALSE
ACFLL8_09265		2178296	2179789	+	498	NAD-dependent succinate-semialdehyde dehydrogenase	389.82	-2.2273	0.254533	-4.82175	1.42304e-06	1.64988e-05	389.82	0.253943	0.241951	0	1	1	FALSE
ACFLL8_09270	gabT	2179914	2181200	+	429	4-aminobutyrate--2-oxoglutarate transaminase	283.413	-1.64256	0.260992	-2.46198	0.0138172	0.07422	283.413	0.160194	0.251729	0	1	1	FALSE
ACFLL8_09275		2181507	2182931	+	475	amino acid permease	74.0158	1.91	0.308776	2.94714	0.00320733	0.0202037	74.0158	0.766756	0.327952	0	1	1	FALSE
ACFLL8_09280	mmuM	2182921	2183916	+	332	homocysteine S-methyltransferase	52.4444	1.59111	0.382621	1.54489	0.122372	0.47819	52.4444	0.465088	0.405049	0	1	1	FALSE
ACFLL8_09285		2184197	2184850	+	218	DsbA family oxidoreductase	395.69	2.35547	0.229016	5.91867	3.24548e-09	5.378e-08	395.69	0.672645	0.236328	0	1	1	FALSE
ACFLL8_09290	rihA	2185016	2185951	+	312	pyrimidine-specific ribonucleoside hydrolase RihA	674.156	0.508295	0.240643	0	1	1	674.156	0.139834	0.242096	0	1	1	FALSE
ACFLL8_09295		2185968	2187653	+	562	GMC oxidoreductase	1379.45	0.493074	0.203555	0	1	1	1379.45	0.559019	0.203888	0	1	1	FALSE
ACFLL8_09300		2187810	2188037	+	76	glutaredoxin family protein	248.349	1.82183	0.345693	2.37733	0.0174383	0.0914338	248.349	-0.336129	0.357368	0	1	1	FALSE
ACFLL8_09305		2189457	2190122	-	222	GntR family transcriptional regulator	439.454	0.874846	0.243007	0	1	1	439.454	-0.134804	0.247322	0	1	1	FALSE
ACFLL8_09310		2190541	2192022	+	494	malonyl-CoA decarboxylase	314.725	-1.53343	0.213985	-2.49284	0.0126725	0.0688075	314.725	-0.316964	0.20817	0	1	1	FALSE
ACFLL8_09315		2192187	2193746	+	520	malonyl-CoA synthase	203.019	-0.703638	0.244846	0	1	1	203.019	-0.365265	0.245144	0	1	1	FALSE
ACFLL8_09320	madL	2194038	2194511	+	158	malonate transporter subunit MadL	34.6891	1.26045	0.401848	0.648133	0.516899	1	34.6891	0.685039	0.421138	0	1	1	FALSE
ACFLL8_09325	madM	2194522	2195283	+	254	malonate transporter subunit MadM	86.9478	0.922247	0.366136	0	1	1	86.9478	-0.15736	0.381295	0	1	1	FALSE
ACFLL8_09330		2195426	2196307	-	294	alpha/beta hydrolase	280.714	-1.07519	0.282881	-0.26579	0.790401	1	280.714	0.40344	0.277232	0	1	1	FALSE
ACFLL8_09335		2196463	2198634	-	724	TonB-dependent siderophore receptor	167.679	-0.193461	0.228982	0	1	1	167.679	0.251699	0.228389	0	1	1	FALSE
ACFLL8_09340		2198769	2199773	+	335	helix-turn-helix transcriptional regulator	67.5219	0.160155	0.387358	0	1	1	67.5219	0.0608655	0.393276	0	1	1	FALSE
ACFLL8_09345		2199942	2201249	+	436	O-acetylhomoserine aminocarboxypropyltransferase/cysteine synthase family protein	690.74	1.84744	0.306575	2.76422	0.00570596	0.0336326	690.74	0.656341	0.308813	0	1	1	FALSE
ACFLL8_09350		2201611	2202603	+	331	DctP family TRAP transporter solute-binding subunit	203.543	-0.0394985	0.311792	0	1	1	203.543	0.488647	0.311022	0	1	1	FALSE
ACFLL8_09355		2202606	2203199	+	198	TRAP transporter small permease	57.8069	-0.984301	0.371982	0	1	1	57.8069	0.345435	0.354163	0	1	1	FALSE
ACFLL8_09360		2203196	2204485	+	430	TRAP transporter large permease	150.969	-0.882409	0.261527	0	1	1	150.969	-0.0162265	0.256695	0	1	1	FALSE
ACFLL8_09365		2204489	2205268	+	260	aldolase/citrate lyase family protein	113.805	-0.861077	0.287099	0	1	1	113.805	0.684783	0.273025	0	1	1	FALSE
ACFLL8_09370		2205377	2207113	+	579	thiamine pyrophosphate-binding protein	100.972	-0.381082	0.276881	0	1	1	100.972	0.0950367	0.275645	0	1	1	FALSE
ACFLL8_09375		2207115	2208452	+	446	Zn-dependent hydrolase	91.2098	-1.46065	0.31985	-1.44022	0.149805	0.566486	91.2098	-0.120932	0.304726	0	1	1	FALSE
ACFLL8_09380		2208449	2209981	+	511	aldehyde dehydrogenase	163.833	-1.63112	0.268066	-2.35435	0.0185549	0.0963453	163.833	0.0143325	0.254149	0	1	1	FALSE
ACFLL8_09385		2210131	2211135	-	335	LysR family transcriptional regulator	373.242	-0.538959	0.268405	0	1	1	373.242	-0.302759	0.268927	0	1	1	FALSE
ACFLL8_09390		2211323	2212750	+	476	sodium:solute symporter	388.371	0.588201	0.205116	0	1	1	388.371	-0.0321774	0.209158	0	1	1	FALSE
ACFLL8_09395	dctP	2213428	2214417	+	330	TRAP transporter substrate-binding protein DctP	702.393	-1.43998	0.227962	-1.93008	0.0535969	0.239362	702.393	0.19708	0.224431	0	1	1	FALSE
ACFLL8_09400		2214428	2214979	+	184	TRAP transporter small permease	115.226	-1.11084	0.2651	-0.418096	0.675877	1	115.226	-0.0465588	0.255777	0	1	1	FALSE
ACFLL8_09405		2214983	2216287	+	435	TRAP transporter large permease subunit	251.372	-0.541527	0.27097	0	1	1	251.372	0.0770872	0.269691	0	1	1	FALSE
ACFLL8_09410		2216310	2216978	+	223	RraA family protein	105.468	-1.08754	0.414198	-0.211356	0.832609	1	105.468	-0.0028155	0.407585	0	1	1	FALSE
ACFLL8_09415		2217124	2217621	-	166	OsmC family protein	234.603	0.61582	0.211173	0	1	1	234.603	0.00749266	0.217506	0	1	1	FALSE
ACFLL8_09420		2217779	2218861	+	361	hypothetical protein	688.192	0.791519	0.196938	0	1	1	688.192	-0.0327015	0.199813	0	1	1	FALSE
ACFLL8_09425		2218968	2219675	-	236	hypothetical protein	2312.14	1.47726	0.226436	2.10771	0.0350564	0.167327	2312.14	-0.287825	0.227952	0	1	1	FALSE
ACFLL8_09430		2219672	2220817	-	382	hypothetical protein	7906.4	2.36599	0.263124	5.19143	2.0869e-07	2.73555e-06	7906.4	-0.262974	0.26377	0	1	1	FALSE
ACFLL8_09435		2220821	2221882	-	354	hypothetical protein	10081	2.91499	0.257158	7.44673	9.56842e-14	2.49431e-12	10081	0.236747	0.257671	0	1	1	FALSE
ACFLL8_09440		2221913	2223571	-	553	sigma-54 interaction domain-containing protein	1169.37	1.06875	0.225224	0.305261	0.760168	1	1169.37	-0.227391	0.227423	0	1	1	FALSE
ACFLL8_09445		2223881	2224021	-	47	hypothetical protein	20.0701	1.19071	0.514422	0.370726	0.710842	1	20.0701	0.432713	0.546369	0	1	1	FALSE
ACFLL8_09450	speB	2224080	2225030	+	317	agmatinase	159.33	-1.60751	0.278204	-2.18369	0.0289849	0.140641	159.33	-0.562346	0.270918	0	1	1	FALSE
ACFLL8_09455		2225341	2226657	+	439	YjiH family protein	290.975	-1.68901	0.249327	-2.7635	0.00571856	0.0336504	290.975	-0.633143	0.244691	0	1	1	FALSE
ACFLL8_09460		2226789	2228441	+	551	5-guanidino-2-oxopentanoate decarboxylase	186.691	-2.66281	0.272002	-6.11322	9.76435e-10	1.73243e-08	186.691	-1.15648	0.256264	-0.610606	0.54146	1	FALSE
ACFLL8_09465		2228526	2229992	+	489	aldehyde dehydrogenase family protein	301.075	-2.24755	0.305204	-4.08758	4.35893e-05	0.00039164	301.075	-1.24594	0.300998	-0.817086	0.413879	1	FALSE
ACFLL8_09470		2230153	2231982	-	610	SulP family inorganic anion transporter	2128.68	-4.42032	0.284226	-12.0338	2.35973e-33	3.3159e-31	2128.68	-0.714371	0.27668	0	1	1	FALSE
ACFLL8_09475		2231975	2233288	-	438	FAD/NAD%28P%29-binding oxidoreductase	2487.98	-4.34465	0.322976	-10.3557	3.94239e-25	2.71561e-23	2487.98	-0.856064	0.317882	0	1	1	FALSE
ACFLL8_09480		2233368	2234246	-	293	MBL fold metallo-hydrolase	808.541	-4.24323	0.340788	-9.51685	1.78506e-21	9.3596e-20	808.541	-1.06168	0.327822	-0.188164	0.850748	1	FALSE
ACFLL8_09485		2234480	2235952	+	491	sugar porter family MFS transporter	148.776	-0.74245	0.263474	0	1	1	148.776	-0.242268	0.262271	0	1	1	FALSE
ACFLL8_09490		2236317	2237318	+	334	substrate-binding domain-containing protein	547.264	-1.90308	0.507072	-1.78097	0.0749179	0.314816	547.264	0.267802	0.503715	0	1	1	FALSE
ACFLL8_09495		2237374	2238642	+	423	ABC transporter substrate-binding protein	534.654	-1.81286	0.391156	-2.07808	0.0377017	0.177067	534.654	0.0464708	0.387612	0	1	1	FALSE
ACFLL8_09500		2238839	2239687	+	283	carbohydrate ABC transporter permease	254.033	-0.844984	0.547276	0	1	1	254.033	0.178959	0.5455	0	1	1	FALSE
ACFLL8_09505		2239687	2240586	+	300	carbohydrate ABC transporter permease	151.96	-0.948236	0.473627	0	1	1	151.96	-0.041792	0.470724	0	1	1	FALSE
ACFLL8_09510		2240674	2241699	+	342	ABC transporter ATP-binding protein	108.591	-0.594105	0.52876	0	1	1	108.591	0.317789	0.525407	0	1	1	FALSE
ACFLL8_09515		2241796	2243139	+	448	trehalase family glycosidase	136.367	-0.266165	0.269159	0	1	1	136.367	0.310376	0.267324	0	1	1	FALSE
ACFLL8_09520		2243139	2244401	+	421	AGE family epimerase/isomerase	289.458	-0.397641	0.274185	0	1	1	289.458	0.048099	0.273879	0	1	1	FALSE
ACFLL8_09525		2244750	2246045	+	432	DUF3100 domain-containing protein	493.607	-0.0653918	0.196935	0	1	1	493.607	0.109481	0.197625	0	1	1	FALSE
ACFLL8_09530		2246130	2247290	+	387	M20 aminoacylase family protein	249.399	-0.975858	0.237757	0	1	1	249.399	-0.0087804	0.2338	0	1	1	FALSE
ACFLL8_09535		2247410	2248489	+	360	NAD%28P%29-dependent oxidoreductase	760.621	-0.820128	0.20847	0	1	1	760.621	-0.0764362	0.20758	0	1	1	FALSE
ACFLL8_09540		2248539	2249459	-	307	LysR family transcriptional regulator	441.405	-1.05419	0.22259	-0.243452	0.807656	1	441.405	-0.521073	0.221922	0	1	1	FALSE
ACFLL8_09545	arfB	2249887	2250300	+	138	alternative ribosome rescue aminoacyl-tRNA hydrolase ArfB	714.279	1.06096	0.22863	0.266631	0.789754	1	714.279	-0.407684	0.232718	0	1	1	FALSE
ACFLL8_09550		2250406	2251113	+	236	SIMPL domain-containing protein	257.052	-1.49942	0.212278	-2.35264	0.0186406	0.0965532	257.052	-0.768843	0.209181	0	1	1	FALSE
ACFLL8_09555		2251187	2251489	+	101	helix-turn-helix domain-containing protein	162.022	0.116966	0.272304	0	1	1	162.022	-0.553954	0.280863	0	1	1	FALSE
ACFLL8_09560		2251573	2251881	+	103	hypothetical protein	130.493	-1.32602	0.259609	-1.25583	0.209178	0.74679	130.493	-0.481554	0.253446	0	1	1	FALSE
ACFLL8_09565		2251983	2252318	-	112	hypothetical protein	675.304	3.78403	0.268908	10.3531	4.05153e-25	2.73712e-23	675.304	0.325508	0.280645	0	1	1	FALSE
ACFLL8_09570		2252668	2253093	-	142	DUF1090 family protein	400.346	2.53258	0.216998	7.06267	1.63334e-12	3.90334e-11	400.346	0.243927	0.228626	0	1	1	FALSE
ACFLL8_09580		2253818	2254093	+	92	hypothetical protein	2098.52	-1.00801	0.187449	-0.0427101	0.965933	1	2098.52	0.114363	0.186696	0	1	1	FALSE
ACFLL8_09585		2254414	2255517	+	368	GGDEF domain-containing protein	2196.24	-1.99888	0.282167	-3.54003	0.00040008	0.00296515	2196.24	-0.284685	0.281025	0	1	1	FALSE
ACFLL8_09590		2255710	2256249	-	180	YaeQ family protein	309.579	2.55748	0.378114	4.11907	3.80403e-05	0.00034711	309.579	0.209598	0.387243	0	1	1	FALSE
ACFLL8_09595	mtnK	2256410	2257660	-	417	S-methyl-5-thioribose kinase	2098.41	3.46534	0.44061	5.59528	2.20262e-08	3.29269e-07	2098.41	0.336736	0.44251	0	1	1	FALSE
ACFLL8_09600	cls	2257874	2259301	-	476	cardiolipin synthase	383.924	1.68691	0.330039	2.08129	0.0374074	0.176392	383.924	-0.378831	0.337601	0	1	1	FALSE
ACFLL8_09605		2259473	2260978	-	502	fumarate hydratase	1181.2	1.98284	0.215357	4.56379	5.02386e-06	5.40284e-05	1181.2	0.0795025	0.218585	0	1	1	FALSE
ACFLL8_09610		2261280	2262203	+	308	N-acetylmuramoyl-L-alanine amidase	321.778	-0.305675	0.222788	0	1	1	321.778	0.0938467	0.222678	0	1	1	FALSE
ACFLL8_09615		2262411	2262767	+	119	hypothetical protein	301.609	0.589	0.389466	0	1	1	301.609	0.537143	0.390556	0	1	1	FALSE
ACFLL8_09620		2262895	2263596	-	234	ABC transporter ATP-binding protein	756.51	0.208469	0.334034	0	1	1	756.51	-0.09726	0.334935	0	1	1	FALSE
ACFLL8_09625	livG	2263671	2264426	-	252	high-affinity branched-chain amino acid ABC transporter ATP-binding protein LivG	951.561	-0.266986	0.279245	0	1	1	951.561	-0.0193755	0.279413	0	1	1	FALSE
ACFLL8_09630	livM	2264509	2265834	-	442	high-affinity branched-chain amino acid ABC transporter permease LivM	1105.26	-0.365775	0.344545	0	1	1	1105.26	-0.221982	0.344765	0	1	1	FALSE
ACFLL8_09635	livH	2265834	2266754	-	307	high-affinity branched-chain amino acid ABC transporter permease LivH	515.357	-0.488122	0.338563	0	1	1	515.357	-0.322515	0.339011	0	1	1	FALSE
ACFLL8_09640		2266985	2268085	-	367	branched-chain amino acid ABC transporter substrate-binding protein	8636.26	0.213349	0.288328	0	1	1	8636.26	-0.321691	0.288455	0	1	1	FALSE
ACFLL8_09645	uvrB	2268727	2270754	-	676	excinuclease ABC subunit UvrB	2817.97	0.0871222	0.278338	0	1	1	2817.97	0.249394	0.278426	0	1	1	FALSE
ACFLL8_09650		2270829	2271263	-	145	OsmC family protein	304.463	-0.376978	0.250301	0	1	1	304.463	-0.290173	0.251681	0	1	1	FALSE
ACFLL8_09655		2271326	2271517	-	64	hypothetical protein	166.427	1.18589	0.270962	0.686019	0.492701	1	166.427	-0.131134	0.283538	0	1	1	FALSE
ACFLL8_09660		2271790	2272863	+	358	YgfZ/GcvT domain-containing protein	300.388	-0.0716464	0.232044	0	1	1	300.388	0.0617684	0.233211	0	1	1	FALSE
ACFLL8_09665		2273106	2275874	-	923	EAL domain-containing protein	2720.46	-2.21369	0.30849	-3.93428	8.34449e-05	0.00070979	2720.46	-0.968745	0.30788	0	1	1	FALSE
ACFLL8_09670		2275996	2276763	-	256	TatD family hydrolase	225.43	0.382646	0.250552	0	1	1	225.43	-0.294678	0.256901	0	1	1	FALSE
ACFLL8_09675	mscL	2276899	2277381	-	161	large conductance mechanosensitive channel protein MscL	1317.36	0.310299	0.37227	0	1	1	1317.36	-1.05859	0.373752	-0.156763	0.875432	1	FALSE
ACFLL8_09680		2277711	2279300	-	530	peptide chain release factor 3	1768.61	1.98385	0.228856	4.29896	1.71598e-05	0.00016981	1768.61	0.142443	0.230799	0	1	1	FALSE
ACFLL8_09685		2279435	2279902	-	156	MerR family DNA-binding protein	333.692	0.553967	0.289791	0	1	1	333.692	-0.279988	0.29406	0	1	1	FALSE
ACFLL8_09690		2280024	2280806	+	261	cation transporter	359.425	2.2759	0.451734	2.82444	0.0047363	0.0285396	359.425	0.947833	0.454873	0	1	1	FALSE
ACFLL8_09710		2284398	2284916	+	173	MarR family winged helix-turn-helix transcriptional regulator	288.409	-2.37398	0.282344	-4.86633	1.13692e-06	1.34027e-05	288.409	-0.416687	0.270503	0	1	1	FALSE
ACFLL8_09715		2285034	2285201	+	56	DUF2256 domain-containing protein	320.812	-0.502293	0.219596	0	1	1	320.812	0.167623	0.218117	0	1	1	FALSE
ACFLL8_09720		2285188	2286756	+	523	DASH family cryptochrome	2081.34	-1.86091	0.250261	-3.44005	0.00058161	0.0041698	2081.34	-0.0918068	0.248908	0	1	1	FALSE
ACFLL8_09725		2286870	2288141	+	424	ATP-binding protein	1164.21	-0.871451	0.19301	0	1	1	1164.21	-0.12608	0.19237	0	1	1	FALSE
ACFLL8_09730		2288173	2288709	+	179	response regulator transcription factor	1118.17	-1.44986	0.231771	-1.94097	0.0522621	0.234779	1118.17	-0.403496	0.230595	0	1	1	FALSE
ACFLL8_09735		2288706	2289494	-	263	enoyl-CoA hydratase-related protein	1432.49	-2.33052	0.179359	-7.41821	1.18711e-13	3.06641e-12	1432.49	-0.321344	0.175579	0	1	1	FALSE
ACFLL8_09740		2289822	2290595	-	258	3-hydroxybutyrate dehydrogenase	6176.18	-2.62633	0.201398	-8.0752	6.73685e-16	2.21183e-14	6176.18	-0.112513	0.200265	0	1	1	FALSE
ACFLL8_09745		2290847	2292274	-	476	ATP-binding protein	1015.42	-1.72244	0.458581	-1.57538	0.115168	0.454591	1015.42	-0.932696	0.458126	0	1	1	FALSE
ACFLL8_09750		2292271	2292933	-	221	response regulator	342.873	-1.27231	0.469855	-0.579561	0.56221	1	342.873	-1.26523	0.470983	-0.563138	0.573341	1	FALSE
ACFLL8_09755		2293032	2293916	-	295	hypothetical protein	929.385	-1.99288	0.437744	-2.26818	0.0233182	0.116194	929.385	-1.21476	0.437179	-0.491243	0.623255	1	FALSE
ACFLL8_09760		2294080	2294808	-	243	LrgB family protein	171.047	-0.565933	0.323903	0	1	1	171.047	-0.845963	0.328708	0	1	1	FALSE
ACFLL8_09765		2294805	2295299	-	165	CidA/LrgA family protein	214.05	-0.361635	0.301266	0	1	1	214.05	-0.942233	0.307281	0	1	1	FALSE
ACFLL8_09770		2295555	2298731	+	1059	EAL domain-containing protein	2894.51	-0.448349	0.162491	0	1	1	2894.51	-0.574651	0.162901	0	1	1	FALSE
ACFLL8_09775		2298904	2301006	-	701	HlyD family efflux transporter periplasmic adaptor subunit	3097.61	-0.605317	0.259175	0	1	1	3097.61	-0.381849	0.259248	0	1	1	FALSE
ACFLL8_09780		2301010	2302386	-	459	efflux RND transporter periplasmic adaptor subunit	1571.85	-1.11787	0.325228	-0.362438	0.717025	1	1571.85	-0.236724	0.324819	0	1	1	FALSE
ACFLL8_09785		2302383	2303114	-	244	efflux RND transporter periplasmic adaptor subunit	1463.7	-0.494139	0.215194	0	1	1	1463.7	0.00086958	0.215059	0	1	1	FALSE
ACFLL8_09790		2303227	2304777	-	517	TolC family protein	4641.95	-0.762449	0.206211	0	1	1	4641.95	-0.0945291	0.206095	0	1	1	FALSE
ACFLL8_09795		2304984	2324555	-	6524	VCBS domain-containing protein	45142.7	-0.215164	0.212028	0	1	1	45142.7	-0.191537	0.212041	0	1	1	FALSE
ACFLL8_09800		2324998	2325438	-	147	low molecular weight phosphotyrosine protein phosphatase	317.994	2.08304	0.258459	4.19038	2.78493e-05	0.0002637	317.994	0.154937	0.268404	0	1	1	FALSE
ACFLL8_09805		2325785	2327167	+	461	NAD-dependent succinate-semialdehyde dehydrogenase	1306.81	-1.62507	0.271397	-2.30316	0.0212699	0.107667	1306.81	-0.776558	0.270742	0	1	1	FALSE
ACFLL8_09810		2327355	2328194	-	280	cation diffusion facilitator family transporter	821.591	0.136483	0.184225	0	1	1	821.591	0.163173	0.184972	0	1	1	FALSE
ACFLL8_09815		2328605	2329534	+	310	DMT family transporter	764.574	0.268721	0.243552	0	1	1	764.574	0.153322	0.244398	0	1	1	FALSE
ACFLL8_09820		2329629	2330735	+	369	endonuclease/exonuclease/phosphatase family protein	964.144	-0.607442	0.181097	0	1	1	964.144	-0.277952	0.181199	0	1	1	FALSE
ACFLL8_09825		2330843	2331418	+	192	DUF1456 family protein	334.879	0.769559	0.208156	0	1	1	334.879	-0.0791211	0.213872	0	1	1	FALSE
ACFLL8_09830		2331526	2332389	-	288	PA4780 family RIO1-like protein kinase	1240.23	2.14305	0.277775	4.11501	3.87161e-05	0.00035107	1240.23	0.637025	0.279507	0	1	1	FALSE
ACFLL8_09835		2332540	2333610	-	357	NAD%28P%29-dependent alcohol dehydrogenase	548.715	0.28667	0.249697	0	1	1	548.715	0.151556	0.250891	0	1	1	FALSE
ACFLL8_09840		2333644	2334063	+	140	hypothetical protein	696.464	-1.31514	0.342064	-0.921298	0.356895	1	696.464	-1.23641	0.34268	-0.689875	0.490273	1	FALSE
ACFLL8_09845		2334072	2334320	-	83	hypothetical protein	144.711	-0.217064	0.268975	0	1	1	144.711	-0.81759	0.278679	0	1	1	FALSE
ACFLL8_09850		2334587	2335081	+	165	NYN domain-containing protein	51.7403	-1.20247	0.35888	-0.56417	0.572638	1	51.7403	-0.507424	0.351463	0	1	1	FALSE
ACFLL8_09855		2335232	2336002	-	257	UTRA domain-containing protein	298.897	-1.63272	0.221061	-2.86218	0.00420738	0.025795	298.897	-0.0737015	0.212495	0	1	1	FALSE
ACFLL8_09860		2336577	2337665	+	363	ABC transporter substrate-binding protein	1566.06	-3.73071	0.905677	-3.0151	0.00256894	0.0165895	1566.06	-0.90964	0.903941	0	1	1	FALSE
ACFLL8_09865		2337758	2338582	+	275	alkaline phosphatase family protein	283.309	-2.99978	0.312223	-6.40498	1.50385e-10	2.8557e-09	283.309	-0.45243	0.293274	0	1	1	FALSE
ACFLL8_09870		2338582	2339430	+	283	ABC transporter permease	443.956	-2.52606	0.545215	-2.799	0.00512612	0.0305222	443.956	-0.419378	0.540689	0	1	1	FALSE
ACFLL8_09875		2339414	2340379	+	322	ABC transporter permease	285.017	-1.88215	0.497892	-1.77177	0.0764324	0.320414	285.017	-0.379166	0.493824	0	1	1	FALSE
ACFLL8_09880		2340379	2341578	+	400	ABC transporter ATP-binding protein	774.972	-3.73225	0.958226	-2.85136	0.0043532	0.0266425	774.972	-0.360891	0.95412	0	1	1	FALSE
ACFLL8_09885		2341586	2342287	+	234	HAD family hydrolase	477.403	-3.30735	0.576666	-4.0012	6.30227e-05	0.00054666	477.403	-0.368978	0.568708	0	1	1	FALSE
ACFLL8_09890		2342379	2343635	+	419	GAK system CofD-like protein	1318.6	0.266555	0.218226	0	1	1	1318.6	0.0576556	0.218886	0	1	1	FALSE
ACFLL8_09895	chrA	2343753	2345033	-	427	chromate efflux transporter	127.889	-0.670364	0.261139	0	1	1	127.889	0.315564	0.254414	0	1	1	FALSE
ACFLL8_09900	arsJ	2345123	2346442	-	440	organoarsenical effux MFS transporter ArsJ	234.183	-0.856114	0.20631	0	1	1	234.183	0.114726	0.201567	0	1	1	FALSE
ACFLL8_09905		2346444	2347547	-	368	ArsJ-associated glyceraldehyde-3-phosphate dehydrogenase	187.165	-0.832942	0.267028	0	1	1	187.165	0.155862	0.262345	0	1	1	FALSE
ACFLL8_09910		2347652	2348101	-	150	ArsR family transcriptional regulator	69.1937	2.42196	0.365009	3.89569	9.79181e-05	0.00081901	69.1937	1.11889	0.384081	0.309556	0.756899	1	FALSE
ACFLL8_09915	trxA	2348502	2348825	+	108	thioredoxin	1144.5	3.1923	0.275766	7.94984	1.86752e-15	5.8717e-14	1144.5	1.11325	0.278453	0.406694	0.684233	1	FALSE
ACFLL8_09920		2349018	2350136	+	373	L-dopachrome tautomerase-related protein	98.444	1.4858	0.272451	1.78309	0.0745713	0.314111	98.444	0.0466987	0.294411	0	1	1	FALSE
ACFLL8_09925		2350349	2351530	+	394	MFS transporter	97.3232	0.389193	0.263918	0	1	1	97.3232	0.3032	0.269472	0	1	1	FALSE
ACFLL8_09930		2351639	2352553	+	305	TIGR03571 family LLM class oxidoreductase	40.057	-1.0866	0.35106	-0.246675	0.80516	1	40.057	-0.400528	0.341857	0	1	1	FALSE
ACFLL8_09935		2352627	2353637	+	337	alcohol dehydrogenase catalytic domain-containing protein	279.038	-3.01047	0.312742	-6.42853	1.2884e-10	2.50064e-09	279.038	-0.90248	0.297274	0	1	1	FALSE
ACFLL8_09940	dkgB	2353813	2354619	+	269	2%2C5-didehydrogluconate reductase DkgB	1031.23	-0.768291	0.328423	0	1	1	1031.23	-0.57745	0.328643	0	1	1	FALSE
ACFLL8_09945	cydC	2354742	2356457	-	572	thiol reductant ABC exporter subunit CydC	2110.81	-3.09302	0.192528	-10.8713	1.58014e-27	1.46079e-25	2110.81	-1.42607	0.189902	-2.24364	0.0248558	1	FALSE
ACFLL8_09950	cydD	2356438	2358198	-	587	thiol reductant ABC exporter subunit CydD	2594.51	-2.90476	0.221429	-8.60211	7.8266e-18	3.02141e-16	2594.51	-1.25872	0.219753	-1.1773	0.239074	1	FALSE
ACFLL8_09955	cydB	2358215	2359213	-	333	cytochrome d ubiquinol oxidase subunit II	11820.2	-3.46623	0.239521	-10.2965	7.30512e-25	4.66598e-23	11820.2	-1.55521	0.239004	-2.32301	0.0201785	1	FALSE
ACFLL8_09960		2359218	2360624	-	469	cytochrome ubiquinol oxidase subunit I	17185.6	-3.06586	0.238476	-8.66277	4.60425e-18	1.85916e-16	17185.6	-1.69814	0.238271	-2.93003	0.00338926	0.248051	FALSE
ACFLL8_09965		2361251	2362534	-	428	pyridoxal phosphate-dependent aminotransferase	2730.83	-0.647532	0.231438	0	1	1	2730.83	-0.383778	0.231507	0	1	1	FALSE
ACFLL8_09970		2363095	2365287	+	731	TonB-dependent siderophore receptor	257.113	0.0217423	0.244922	0	1	1	257.113	0.0251343	0.246889	0	1	1	FALSE
ACFLL8_09975		2365402	2366466	+	355	iron-siderophore ABC transporter substrate-binding protein	102.069	-0.0400818	0.313296	0	1	1	102.069	-0.242354	0.319533	0	1	1	FALSE
ACFLL8_09980		2366426	2367478	+	351	FecCD family ABC transporter permease	63.7233	-0.119388	0.363678	0	1	1	63.7233	-0.0803274	0.368634	0	1	1	FALSE
ACFLL8_09985		2367475	2368632	+	386	FecCD family ABC transporter permease	55.4204	-0.591499	0.420131	0	1	1	55.4204	-0.137638	0.418914	0	1	1	FALSE
ACFLL8_09990		2368629	2369438	+	270	ABC transporter ATP-binding protein	109.055	-0.972583	0.361935	0	1	1	109.055	-0.413007	0.360049	0	1	1	FALSE
ACFLL8_09995		2370213	2370890	-	226	hypothetical protein	2173.82	-0.140887	0.18738	0	1	1	2173.82	-0.629296	0.18818	0	1	1	FALSE
ACFLL8_10000		2370893	2371999	-	369	AAA family ATPase	5467.23	1.8623	0.247114	3.48949	0.00048394	0.00353451	5467.23	-0.431805	0.247942	0	1	1	FALSE
ACFLL8_10005		2372619	2373596	+	326	putative urea ABC transporter substrate-binding protein	437.663	-2.97655	0.359779	-5.49379	3.93399e-08	5.66398e-07	437.663	-0.904838	0.351596	0	1	1	FALSE
ACFLL8_10010		2373706	2374530	+	275	ABC transporter permease	232.303	-3.25899	0.445029	-5.07604	3.85375e-07	4.86986e-06	232.303	-0.347882	0.424141	0	1	1	FALSE
ACFLL8_10015		2374527	2375423	+	299	ABC transporter ATP-binding protein	386.322	-3.3267	0.432153	-5.38398	7.2856e-08	1.01969e-06	386.322	-0.649351	0.420257	0	1	1	FALSE
ACFLL8_10020		2375407	2376165	+	253	urea amidolyase associated protein UAAP1	476.514	-4.53598	0.416364	-8.49251	2.02221e-17	7.55748e-16	476.514	-1.14545	0.394194	-0.368986	0.712138	1	FALSE
ACFLL8_10025		2376232	2376966	+	245	urea amidolyase associated protein UAAP2	245.937	-3.85033	0.498986	-5.71224	1.11496e-08	1.69561e-07	245.937	-1.1981	0.478801	-0.413739	0.679065	1	FALSE
ACFLL8_10030	uca	2377166	2380987	+	1274	urea carboxylase	1149.41	-3.56293	0.570215	-4.49468	6.96753e-06	7.26319e-05	1149.41	-0.719273	0.566675	0	1	1	FALSE
ACFLL8_10035	atzF	2380987	2382819	+	611	allophanate hydrolase	859.68	-3.80648	0.531093	-5.28435	1.26155e-07	1.70455e-06	859.68	-0.63172	0.524696	0	1	1	FALSE
ACFLL8_10040		2383025	2383708	-	228	type 1 glutamine amidotransferase domain-containing protein	1147.03	-1.16556	0.214074	-0.773401	0.439285	1	1147.03	0.858551	0.211194	0	1	1	FALSE
ACFLL8_10045		2383919	2384623	-	235	SDR family oxidoreductase	393.76	-0.935883	0.313436	0	1	1	393.76	0.602046	0.309736	0	1	1	FALSE
ACFLL8_10050		2384793	2385734	+	314	LysR substrate-binding domain-containing protein	108.01	-0.0167221	0.277536	0	1	1	108.01	-0.529339	0.288201	0	1	1	FALSE
ACFLL8_10055		2385847	2388039	-	731	OsmC domain/YcaO domain-containing protein	515.716	1.75544	0.212669	3.5522	0.00038203	0.00284336	515.716	0.595774	0.216888	0	1	1	FALSE
ACFLL8_10060		2388385	2388624	+	80	hypothetical protein	57.1752	-0.362183	0.390688	0	1	1	57.1752	0.324901	0.385901	0	1	1	FALSE
ACFLL8_10065		2388635	2390161	+	509	sodium:solute symporter family protein	189.147	-0.807145	0.413995	0	1	1	189.147	-0.175972	0.412739	0	1	1	FALSE
ACFLL8_10070		2390254	2391672	+	473	amidase	65.3698	0.0416228	0.417458	0	1	1	65.3698	0.372376	0.418	0	1	1	FALSE
ACFLL8_10075		2391845	2392837	+	331	IS481 family transposase	1018.77	-0.0033683	0.17195	0	1	1	1018.77	0.201401	0.172271	0	1	1	FALSE
ACFLL8_10080		2393125	2393616	+	164	hypothetical protein	8656.37	0.810385	0.174272	0	1	1	8656.37	-1.02306	0.174899	-0.131854	0.8951	1	FALSE
ACFLL8_10085		2394146	2394730	+	195	NAD%28P%29H-dependent oxidoreductase	254.988	-0.892056	0.21652	0	1	1	254.988	-0.769192	0.218448	0	1	1	FALSE
ACFLL8_10090		2394892	2396982	-	697	TonB-dependent receptor domain-containing protein	495.911	-1.89336	0.4682	-1.90807	0.0563826	0.248522	495.911	-0.904456	0.466789	0	1	1	FALSE
ACFLL8_10095		2397057	2398574	-	506	PepSY-associated TM helix domain-containing protein	396.388	-2.31555	0.573188	-2.29515	0.0217244	0.109652	396.388	-1.7402	0.57259	-1.29272	0.196108	1	FALSE
ACFLL8_10100		2398686	2399159	-	158	hypothetical protein	431.559	-1.68584	1.02968	-0.666068	0.505368	1	431.559	-2.86535	1.03255	-1.80655	0.070833	1	FALSE
ACFLL8_10105		2399156	2399839	-	228	SCO family protein	350.646	0.762421	0.332831	0	1	1	350.646	-0.286077	0.337029	0	1	1	FALSE
ACFLL8_10110		2400095	2400517	+	141	hypothetical protein	108.745	-0.0138463	0.281635	0	1	1	108.745	0.227908	0.283075	0	1	1	FALSE
ACFLL8_10115		2400570	2401736	-	389	hypothetical protein	231.908	-0.438034	0.310444	0	1	1	231.908	0.238591	0.308985	0	1	1	FALSE
ACFLL8_10120		2401787	2402668	-	294	type II secretion system F family protein	90.3407	-1.54784	0.321683	-1.70304	0.0885608	0.361761	90.3407	0.113811	0.300759	0	1	1	FALSE
ACFLL8_10125		2402665	2403528	-	288	type II secretion system F family protein	43.9979	-1.96743	0.509306	-1.89951	0.057498	0.252488	43.9979	-0.12596	0.474052	0	1	1	FALSE
ACFLL8_10130		2403530	2404966	-	479	CpaF family protein	138.152	-0.827453	0.308298	0	1	1	138.152	0.0540353	0.303753	0	1	1	FALSE
ACFLL8_10135		2404963	2405730	-	256	tetratricopeptide repeat protein	45.3677	-1.41813	0.566225	-0.738443	0.460245	1	45.3677	-0.551256	0.557464	0	1	1	FALSE
ACFLL8_10140		2405741	2407720	-	660	pilus assembly protein N-terminal domain-containing protein	240.296	-0.91374	0.288319	0	1	1	240.296	-0.087959	0.285772	0	1	1	FALSE
ACFLL8_10145		2407854	2408600	-	249	hypothetical protein	99.0228	-1.10109	0.428813	-0.235733	0.81364	1	99.0228	-0.395552	0.42557	0	1	1	FALSE
[truncated: 1,516 more rows]

## Sheet: S3
Table S3: Upregulated genes of OBi1 grown in homarine and ortholog genes between Cobetia sp. OBi1 and R. pomeroyi DSS-3
Genes present in OBi1 and DSS-3 in the same row that present e-value and percent identity are considered orthologs based on a reciprocal best hit analysis.
N-methyl glutamate dehydrogenase genes were aligned using a BLOSUM62 matrix followed by a tree to determine their relationships (Supplementary Figures S4,5,6, and 7).
All OBi1 genes were enriched in the presence of homarine, except for ACFLL8_11520.
Bold indicates we had a mutant available and tested for that gene.
* Indicates genes disrupted by homologous recombination (OBi1) or Tn5 transposon instertion (DSS3) that failed to grow or exhibited altered growth compared to the wild type in homarine.
** Indicates genes disrupted by a Tn5 transposon that failed to grow or exhibited altered growth compared to the wild type in N-methyl glutamic acid.
OBi1 Gene Annotations				DSS-3 Gene Annotations					OBi1 to DSS-3		DSS-3 to OBi1
Gene ID	NCBI Description	Assigned gene function	InterPro Scan assigned function	Gene ID	NCBI Description	Assigned gene function	KEGG function	InterPro Scan assigned function	e-value	percent identity	e-value	percent identity
Genes involved in homarine degradation or located near the catabolic operon
				SPO3185	Transcriptional regulator		GntR family transcriptional regulator
				SPO3186	glycine betaine transporter		BCCT
				SPO3187	(2R)-3-sulfolactate dehydrogenase		(2R)-3-sulfolactate dehydrogenase
ACFLL8_11490	RutC like, putative aminoacrylate peracid reductase	homE	YjgF/YER057c/UK114 family (IPR006175)
ACFLL8_11495	Possible Rut protein	homA	DUF3726	SPO3188	Hypothetical protein	homA	DUF3726 and FAD_binding_4 domains	DUF3726
ACFLL8_11500	Possible RutF flavin reductase	homB		SPO3189 *	Hypothetical protein	homB			5.11e-128	41.463	7.97e-134	41.463
ACFLL8_11505 *	Glycine betaine transporter 2		BCCT transporter family (IPR000060)
ACFLL8_11510	Putative dipeptidase	homC	Peptidase M19 (IPR008257)	SPO3190 *	Hypothetical protein	homC	Peptidase_M19	Peptidase M19 (IPR008257)	8.90e-149	62.54	7.75e-149	62.54
ACFLL8_11515 *	Possible Aldehyde dehydrogenase	homD	Aldehyde dehydrogenase	SPO3191 *	Possible Aldehyde dehydrogenase	homD	Aldehyde dehydrogenase	Aldehyde dehydrogenase	0	60.934	0	60.934
ACFLL8_11520	oxyR like regulatory gene	homR	HTH-type LysR transcriptional regulators (IPR050950)	SPO3192 *	Transcriptional regulator	homR		HTH-type LysR transcriptional regulators (IPR050950)	4.18e-28	29.851	3.67e-28	29.851
N-methyl glutamate dehydrogenase
ACFLL8_07290	Sarcosine oxidase subunit gamma	mgdD		SPO1585 **, *	N-methyl glutamate dehydrogenase subunit D	mgdD	mgdD
ACFLL8_07295	Sarcosine oxidase subunit alpha	mgdC		SPO1586	N-methyl glutamate dehydrogenase subunit C	mgdC	mgdC
ACFLL8_07300	Sarcosine oxidase subunit delta	mgdB		SPO1587	N-methyl glutamate dehydrogenase subunit B	mgdB	mgdB
ACFLL8_07305	Sarcosine oxidase subunit beta	mgdA		SPO1588 **, *	N-methyl glutamate dehydrogenase subunit A	mgdA	mgdA
Flagellar genes
ACFLL8_08975	Flagellar rod assembly protein
ACFLL8_08980	Flagellar P-ring protein			SPO0195	Flagellar P-ring protein FlgI		FlgI		4.45e-88	45.553	3.14e-82	45.869
ACFLL8_08985	Flagellar L-ring protein FlgH			SPO0175	Flagellar L-ring protein FlgH		FlgH		6.20e-14	27.807	3.68e-12	27.473
ACFLL8_08990	Flagellar basal-body rod protein FlgG			SPO0177	Flagellar basal-body rod protein FlgG		FlgG		3.50e-64	42.308	3.12e-64	42.308
ACFLL8_08995	Flagellar basal-body rod protein FlgF
ACFLL8_09000	Flagellar hook protein FlgE			SPO0192	Flagellar hook protein FlgE, putative		FlgE		9.06e-21	25.942	8.29e-21	25.942
ACFLL8_09005	Basal-body rod protein FlgG			SPO3463	Basal-body rod protein FlgD		FlgD		2.50e-12	29.412	2.18e-12	29.412

## Sheet: S4
Table S4: Predicted functional characterization of Hom proteins
Ranking of proteins is based on TM-score of the structural alignment between the query structure and known structures in the Protein Database (PDB) library.
RMSDa is the Root Mean Square Deviation (RMSD) between residues that are structurally aligned by TM-align.
IDENa is the percentage sequence identity in the structurally aligned region.
Cov. represents the coverage of the alignment by TM-align and is equal to the number of structurally aligned residues divided by length of the query protein.
CscoreGO is the confidence score of predicted GO terms. CscoreGO values range in between [0-1]; where a higher value indicates a better confidence in predicting the function using the template.
HomA
Top 10 structural analogs in PDB (as identified by TM-align)
PDB Hit	TM-score	RMSDa	IDENa	Cov.
3i0pA	0.69	3.46	0.089	0.89
1z2iA	0.68	3.44	0.155	0.886
2g8yA	0.68	3.6	0.097	0.886
2x06A	0.68	3.4	0.058	0.871
1x0aA	0.68	3.5	0.104	0.89
3uoeA	0.67	3.44	0.106	0.857
2cwhB	0.66	3.59	0.136	0.876
1xrhC	0.65	3.65	0.091	0.862
1s20G	0.64	3.72	0.089	0.852
3hc1A	0.37	4.85	0.049	0.571
Molecular Function
GO term	CscoreGO	Name
GO:1901265	0.6	nucleoside phosphate binding
GO:0036094	0.6	small molecule binding
Biological Process
GO term	CscoreGO	Name
GO:0055114	0.45	oxidation-reduction process
HomB
Top 10 structural analogs in PDB (as identified by TM-align)
PDB Hit	TM-score	RMSDa	IDENa	Cov.
1wygA	0.38	7.53	0.044	0.611
4uhwA	0.38	7.45	0.032	0.601
7c6oA	0.37	7.05	0.053	0.574
3zyvA	0.37	7.44	0.046	0.588
4a01A	0.35	7.92	0.042	0.587
1dgjA2	0.31	7.9	0.053	0.52
1ffvB3	0.24	6.62	0.018	0.36
1rm6B	0.22	7	0.041	0.342
1xfiA	0.21	6.8	0.045	0.323
1ffuC	0.19	6.49	0.079	0.287
Molecular Function
GO term	CscoreGO	Name
GO:0003824	0.84	catalytic activity
GO:1901363	0.65	heterocyclic compound binding
GO:0097159	0.65	organic cyclic compound binding
GO:0046914	0.63	transition metal ion binding
GO:0051536	0.56	iron-sulfur cluster binding
GO:0050662	0.56	coenzyme binding
GO:0016726	0.56	oxidoreductase activity, acting on CH or CH2 groups, NAD or NADP as acceptor
GO:0000166	0.56	nucleotide binding
GO:0004047	0.5	aminomethyltransferase activity
Biological Process
GO term	CscoreGO	Name
GO:0071704	1	organic substance metabolic process
GO:0044238	1	primary metabolic process
GO:0044237	1	cellular metabolic process
GO:0006807	1	nitrogen compound metabolic process
GO:1901564	0.94	organonitrogen compound metabolic process
GO:0044763	0.85	single-organism cellular process
GO:0044281	0.85	small molecule metabolic process
GO:1901565	0.78	organonitrogen compound catabolic process
GO:0044712	0.78	single-organism catabolic process
GO:0044248	0.78	cellular catabolic process
GO:0034641	0.71	cellular nitrogen compound metabolic process
GO:0006520	0.66	cellular amino acid metabolic process
GO:0006139	0.62	nucleobase-containing compound metabolic process
GO:0046110	0.56	xanthine metabolic process
GO:0006145	0.56	purine nucleobase catabolic process
GO:0006546	0.5	glycine catabolic process
HomC
Top 10 structural analogs in PDB (as identified by TM-align)
PDB Hit	TM-score	RMSDa	IDENa	Cov.
2i5gA	0.91	1.46	0.324	0.948
5lwzA	0.86	1.7	0.233	0.908
1ituA	0.85	1.77	0.226	0.908
3itcA	0.85	1.8	0.257	0.908
3b40A	0.84	1.98	0.194	0.902
6vgoA	0.84	1.93	0.195	0.896
2ragA	0.84	1.97	0.195	0.899
3fdgB	0.83	2.2	0.188	0.899
3lu2A	0.79	2.1	0.207	0.859
4dziA	0.59	3.47	0.116	0.709
Molecular Function
GO term	CscoreGO	Name
GO:0003824	0.87	catalytic activity
GO:0016805	0.73	dipeptidase activity
GO:0004047	0.53	aminomethyltransferase activity
GO:0046914	0.52	transition metal ion binding
GO:0097367	0.51	carbohydrate derivative binding
Biological Process
GO term	CscoreGO	Name
GO:0071704	1	organic substance metabolic process
GO:0044237	1	cellular metabolic process
GO:0006807	1	nitrogen compound metabolic process
GO:1901575	0.86	organic substance catabolic process
GO:0044248	0.86	cellular catabolic process
GO:0044238	0.86	primary metabolic process
GO:1901564	0.85	organonitrogen compound metabolic process
GO:1901565	0.71	organonitrogen compound catabolic process
GO:1901605	0.7	alpha-amino acid metabolic process
GO:0044712	0.7	single-organism catabolic process
GO:0019752	0.7	carboxylic acid metabolic process
GO:0044270	0.54	cellular nitrogen compound catabolic process
GO:0006546	0.53	glycine catabolic process
GO:0046700	0.52	heterocycle catabolic process
HomD
Top 10 structural analogs in PDB (as identified by TM-align)
PDB Hit	TM-score	RMSDa	IDENa	Cov.
6fjxA	0.97	1.36	0.334	0.994
3fg0C	0.96	1.49	0.319	0.99
2jg7A	0.96	1.46	0.305	0.988
4pxnA	0.96	1.32	0.3	0.983
1t90A	0.96	1.57	0.308	0.994
4o5hA	0.96	1.36	0.333	0.983
4ps9A	0.96	1.31	0.297	0.981
7bzvA	0.96	1.64	0.306	0.994
2wmeA	0.96	1.51	0.342	0.988
1a4zA	0.96	1.59	0.306	0.986
Molecular Function
GO term	CscoreGO	Name
GO:0003824	0.93	catalytic activity
GO:1901363	0.89	heterocyclic compound binding
GO:0097159	0.89	organic cyclic compound binding
GO:0016491	0.89	oxidoreductase activity
GO:0000166	0.88	nucleotide binding
GO:0016620	0.87	oxidoreductase activity, acting on the aldehyde or oxo group of donors, NAD or NADP as acceptor
Biological Process
GO term	CscoreGO	Name
GO:0008152	0.98	metabolic process
GO:0044699	0.97	single-organism process
GO:0009987	0.97	cellular process
GO:0044710	0.96	single-organism metabolic process
GO:0071704	0.94	organic substance metabolic process
GO:0044237	0.92	cellular metabolic process
GO:0044763	0.89	single-organism cellular process
GO:0055114	0.87	oxidation-reduction process
GO:0044281	0.86	small molecule metabolic process
GO:0044238	0.86	primary metabolic process
GO:0006807	0.69	nitrogen compound metabolic process
GO:1901575	0.64	organic substance catabolic process
GO:0044712	0.63	single-organism catabolic process
GO:0044723	0.62	single-organism carbohydrate metabolic process
GO:1901564	0.61	organonitrogen compound metabolic process
GO:0044724	0.61	single-organism carbohydrate catabolic process
GO:0044282	0.6	small molecule catabolic process
GO:0044248	0.6	cellular catabolic process
GO:0046174	0.58	polyol catabolic process
GO:0044275	0.58	cellular carbohydrate catabolic process
GO:0006020	0.58	inositol metabolic process
GO:1901576	0.56	organic substance biosynthetic process
GO:0044249	0.55	cellular biosynthetic process

## Sheet: S5
Table S5: R. pomeroyi DSS-3 mutant growth phenotypes
Bold mutant strains exhibit a 50% or less significant reduction in growth compared to the wild-type R. pomeroyi DSS-3.
Homarine 12 mM C
Genes involved in homarine degradation or located near the catabolic operon
Strain	Mutant ID	Mean Growth Percentage	SD Growth	P value
R. pomeroyi DSS-3	-	100	0.0648344	NA
R. pomeroyi DSS-3 Kan	-	0.642202	0.000547723	0.00171567
SPO3185_110715	Δ SPO3185	97.7982	0.0239729	0.882595
SPO3187_108C1	ΔSPO3187	100.275	0.0429337	0.98672
SPO3187_37010	ΔSPO3187	119.358	0.0451962	0.270623
SPO3189_17N5	ΔhomB	0.642202	0.000547723	0.00171567
SPO3189_43B4	ΔhomB	0.642202	0.000547723	0.00171567
SPO3190	ΔhomC	0.458716	7.1261e-18	0.00170449
SPO3191	ΔhomD	6	5.37484e-18	0.00540627
SPO3192_117L10	ΔhomR	2.20183	0.00083666	0.0018202
SPO3192_23A2	ΔhomR	0.917431	0	0.00173448
N-methyl glutamate dehydrogenase
Strain		Mean Growth Percentage	SD Growth	P value
SPO1585	ΔmgdD	42.8	0.00206559	0.0129792
SPO1588	ΔmgdA	25	0.00248328	0.0070483
N-methyl glutamic acid 4 mM C
N-methyl glutamate dehydrogenase
Strain		Mean Growth Percentage	SD Growth	P value
R. pomeroyi DSS-3		100	0.00208167	NA
SPO1585	ΔmgdD	19.9248	0.000752773	0.000600091
SPO1588	ΔmgdA	17.6692	0.00263944	2.27026e-06

## Sheet: S6
Table S6: Results from metabolomics experiments with Cobetia sp. OBi1, particulate samples only.
											Adjusted areas
Mass Feature Information							Enrichment Data				Glucose			Homarine			Glucose + Homarine
Mass Feature	Core Metabolite	Charge	Retention Time (min)	m/z	MS2	Adduct Annotation	p (Homarine)	p (Glucose + Homarine)	fold change (Homarine)	fold change (Glucose + Homarine)	211202_Smp_OBi1_1	211202_Smp_OBi1_2	211202_Smp_OBi1_3	211202_Smp_OBi1_4	211202_Smp_OBi1_5	211202_Smp_OBi1_6	211202_Smp_OBi1_7	211202_Smp_OBi1_8	211202_Smp_OBi1_9
HILICNeg_1	non-core	-1	3.666	87.0076	#N/A	#N/A	0.156288	0.598234	1.5138	0.990882	3.25662e+07	4.49275e+07	4.30342e+07	3.3809e+07	2.024e+07	2.36493e+07	3.76215e+07	3.29325e+07	3.16614e+07
HILICNeg_7	non-core	-1	11.827	98.06	#N/A	#N/A	0.015239	0.00405778	292.371	252.642	0	16562.8	0	958347	695444	740318	1.43182e+06	1.19329e+06	1.26483e+06
HILICNeg_8	non-core	-1	10.897	98.0601	#N/A	#N/A	0.0177523	0.0171753	434.279	310.961	0	18341	28733	2873676	2618465	2859498	3857881	3579414	4736750
HILICNeg_10	non-core	-1	12.227	101.023	#N/A	[M-H]-	0.0563137	0.0113089	6.40693	4.57498	7.47214e+06	9.064e+06	7.7657e+06	2.12404e+07	1.72041e+07	2.30004e+07	3.43227e+07	3.5184e+07	2.60033e+07
HILICNeg_13	non-core	-1	4.882	103.039	50.17123:6369 57.03335:12644 58.36202:7883 59.01266:1285061 59.08838:6191 69.78205:7076 72.62004:7468 103.03899:161291	#N/A	0.387981	0.598707	2.33358	0.663507	1.60719e+07	4.24703e+08	8.27151e+08	8.01946e+08	3.13304e+07	4.89355e+08	1.12043e+08	2.61695e+08	3.07051e+08
HILICNeg_14	non-core	-1	12.073	103.039	#N/A	#N/A	0.0447671	0.0179422	3.98476	4.5757	1.93771e+06	1.61766e+06	1.9192e+06	4.20753e+06	2.7741e+06	2.37195e+06	6.74814e+06	7.29296e+06	7.03239e+06
HILICNeg_18	non-core	-1	11.655	110.984	#N/A	[M-H]-	0.445631	0.655306	1.17779	0.986873	13421819	13886189	7449866	3982751	4059106	7157498	11224545	10234076	8152534
HILICNeg_19	non-core	-1	14.322	111.008	#N/A	#N/A	0.25741	0.318324	1.07019	0.86881	1.00885e+07	1.00031e+07	9.05364e+06	4.23151e+06	5.12758e+06	3.01672e+06	8.26257e+06	7.10979e+06	6.28246e+06
HILICNeg_20	non-core	-1	5.919	111.019	52.96132:6876 56.07968:7351 68.01312:7935 79.71623:6868 81.03244:8230 94.92538:6787 99.71152:6442 111.01896:556838 111.05523:9868	#N/A	0.0913708	0.0847446	0.519306	0.604195	2.21009e+08	1.3153e+08	1.952e+08	8.09586e+07	3.33782e+07	2.17011e+07	1.39806e+08	8.04761e+07	6.32804e+07
Uracil	non-core	-1	3.847	111.019	51.02866:6327 51.27475:6419 65.68471:6201 65.70245:8088 72.22041:7082 77.01003:7452 83.72373:7088 111.01899:137502 111.05524:12877	#N/A	0.495928	0.471949	1.73205	0.725522	12208926	33677744	46669584	24470088	4673360	32344576	18201190	22918740	15553607
HILICNeg_22	non-core	-1	16.452	112.936	#N/A	#N/A	0.17471	0.0607535	1.06551	0.647954	7153152	7263016	8759798	4158292	2592812	3334819	4133294	5299286	3341137
HILICNeg_23	non-core	-1	11.027	113.023	#N/A	#N/A	0.237508	0.592759	0.682467	1.00222	2.70508e+07	3.71562e+07	2.92598e+07	1.00414e+07	7.77356e+06	8.55729e+06	2.83362e+07	2.52093e+07	2.66108e+07
HILICNeg_24	non-core	-1	10.588	113.023	#N/A	#N/A	0.043284	0.00282814	3.74243	5.38444	7.00995e+06	6.40692e+06	7.12285e+06	1.08696e+07	1.0466e+07	9.47645e+06	3.20302e+07	3.22099e+07	2.93834e+07
HILICNeg_25	non-core	-1	9.825	113.06	#N/A	#N/A	0.222611	0.126387	2.71501	1.72304	824467	650210	680801	392860	869306	839517	878775	942074	1.2705e+06
Fumaric acid	non-core	-1	12.688	115.003	#N/A	[M-H]-	0.0265076	0.0208711	6.02308	4.58906	4.68952e+06	6.44524e+06	5.43272e+06	1.63441e+07	1.16539e+07	1.34413e+07	2.21551e+07	2.59645e+07	1.72953e+07
HILICNeg_29	non-core	-1	8.318	116.07	#N/A	#N/A	0.00635503	0.436636	0.317153	0.966712	35148388	28441918	34794804	4194998	4132094	3947063	25668334	28012814	26307118
Succinic acid	non-core	-1	12.111	117.018	52.7692:7974 55.01768:8044 64.49689:6255 67.72324:7118 68.26531:7355 69.11419:7175 71.33129:6685 73.02837:645871 73.06421:6824 82.13746:7437 90.59139:7983 99.00766:44135 99.92476:72225 109.0501:7265 116.92744:298459 116.93332:82375 117.01833:105769	#N/A	0.151082	0.208126	0.889993	1.22823	142391600	108036552	153378688	58541936	52394984	36363508	129822352	141560800	143403792
HILICNeg_34	non-core	-1	5.231	122.024	#N/A	#N/A	0.0247702	0.0141379	61.2435	3.96292	1.25983e+07	1.09976e+07	1.26954e+07	3.08184e+08	2.47222e+08	3.12427e+08	4.86973e+07	3.62106e+07	3.73334e+07
Thymine	non-core	-1	2.855	125.035	62.53186:7966 65.50072:6264 67.8708:7794 71.44009:7160 84.67958:6943 96.95904:51890 107.39845:6621 125.03465:40597	#N/A	0.358741	0.490692	0.980319	0.897872	58862600	41261012	57655368	32707688	18608176	16032521	49601312	37835228	32849014
HILICNeg_37	non-core	-1	4.33	126.535	#N/A	#N/A	0.0270598	0.00686733	717.381	57.6505	14880.9	33905.9	0	6.09736e+06	4.1054e+06	5.34131e+06	999790	742251	762003
HILICNeg_38	non-core	-1	4.285	126.879	#N/A	#N/A	0.0192339	0.00529924	#NUM!	#NUM!	0	0	0	9.58847e+06	8.20448e+06	9.5057e+06	2.00576e+06	1.67855e+06	1.83609e+06
HILICNeg_40	non-core	-1	4.281	126.904	51.23857:7792 52.38636:7333 55.1305:8351 55.91564:7460 59.56837:8770 61.01197:6845 61.63656:7985 68.07795:7170 79.1843:8276 79.75154:9485 82.51614:7363 124.04727:8864 126.9041:11499153	[M-H]-	0.0147902	0.00223172	1469.19	84.0438	1.58656e+07	1.93182e+07	1.61251e+07	1.11164e+10	9.2843e+09	1.0188e+10	1.31875e+09	1.20765e+09	1.16114e+09
HILICNeg_43	non-core	-1	14.448	126.991	#N/A	[M-H]-	0.0977565	0.294792	2.06204	0.794876	759552	607640	1.00557e+06	856252	836392	352691	630660	479848	482124
HILICNeg_45	non-core	-1	4.28	127.274	#N/A	#N/A	0.0272537	0.0183202	2600.65	193.366	0	0	15690	6.04934e+06	4.02436e+06	5.23814e+06	984826	616469	822086
5-Oxoproline	non-core	-1	6.695	128.034	#N/A	[M-H]-	0.149398	0.28022	0.808805	1.14258	7.27708e+07	5.189e+07	5.92517e+07	2.11551e+07	1.90814e+07	1.8639e+07	5.5597e+07	6.52492e+07	5.5881e+07
Propionylglycine	non-core	-1	5.00735	130.05	#N/A	#N/A	0.149476	0.313348	1.42641	1.03145	4.6328e+06	3.89891e+06	3.83066e+06	2.32672e+06	2.41308e+06	2.22365e+06	3.81232e+06	3.89928e+06	3.12775e+06
HILICNeg_53	non-core	-1	11.538	131.082	#N/A	[M-H]-	0.00320278	0.174433	0.157394	0.873184	7.60952e+06	6.71566e+06	7.86586e+06	165393	540055	510331	5.50391e+06	5.54686e+06	5.30441e+06
HILICNeg_55	non-core	-1	13.238	132.029	#N/A	#N/A	0.00771335	0.0541672	0.225844	0.705857	8711842	8028324	7999168	569249	600590	897844	5260770	5287608	4314424
Malic acid	non-core	-1	12.6876	133.014	#N/A	#N/A	0.284575	0.315626	1.27672	1.14489	80193672	89435784	88128864	44320824	26884548	55143312	80488904	92688744	77595408
HILICNeg_57	non-core	-1	2.915	133.991	#N/A	#N/A	0.0786705	0.0464447	0.483217	0.372278	11899992	14144948	20982998	2091338	4103488	2294614	4811946	2611012	7072149
HILICNeg_58	non-core	-1	4.732	134.046	51.68493:7455 51.79963:6324 52.99458:7223 54.95824:7338 58.37181:6793 59.33075:7561 60.12006:7222 65.01335:58191 65.97483:7278 68.02433:43737 72.72107:7101 75.48124:7622 80.02428:28946 80.96421:9590 92.02432:590201 107.03527:2179792 109.04078:7677 113.75312:9163 120.96758:6853 121.04894:8467 134.0463:3691300	#N/A	0.314708	0.498758	1.09653	0.884103	7.45916e+08	4.84885e+08	6.7197e+08	4.39975e+08	2.27922e+08	2.30827e+08	6.51861e+08	4.46453e+08	3.39452e+08
HILICNeg_70	non-core	-1	9.438	140.633	#N/A	#N/A	0.0354952	0.0633834	0.0341932	0.365034	2258352	1395506	1189462	23393	22685	19723	558328	348702	575896
HILICNeg_73	non-core	-1	9.446	141.5	#N/A	#N/A	0.0395626	0.0760012	0.00786965	0.337599	2.5455e+06	1.54761e+06	1.24814e+06	0	8049.39	5961.42	550327	430308	536621
HILICNeg_74	non-core	-1	9.57	142.05	50.49536:7611 57.51929:6453 68.5017:7087 73.32371:7237 108.33372:7280 116.80191:8801 142.05011:107615 142.06889:7065	#N/A	0.00635582	0.00463966	0.185832	0.39717	192843072	173296976	184246704	13117314	14685732	12600694	62399620	64917624	57778472
HILICNeg_75	non-core	-1	10.781	142.05	52.79665:7076 56.8235:7914 58.62872:8939 69.71294:7010 72.55456:6759 78.9669:6809 98.06005:32580 102.50553:7180 109.26369:7054 112.2522:7821 142.05:20524	#N/A	0.0208544	0.0151566	66.1182	45.322	126181	941333	264487	1.28246e+07	1.15687e+07	1.38765e+07	1.85265e+07	1.47619e+07	2.00968e+07
HILICNeg_77	non-core	-1	9.857	142.07	55.82109:6494 76.62087:6505 93.14487:6500 95.5034:6037 142.06334:34731 142.06938:457794	#N/A	0.0203422	0.519452	103.221	1.03126	2544741	2447878	2767463	102735592	96851528	111400600	3059144	2109680	1714208
2-Ketoglutaric acid	non-core	-1	12.243	145.013	51.39236:7264 55.81876:6524 57.03335:10928 60.22976:7534 73.02835:7702 74.52777:7748 91.09241:7111 101.02342:45129 118.03992:12632 127.33211:6702	#N/A	0.401177	0.56104	1.3864	1.05985	35703288	51563072	38981516	17446634	14462896	32865838	42568576	41247588	31743020
HILICNeg_83	non-core	-1	11.405	145.589	#N/A	#N/A	0.0471808	0.310994	0.216726	1.18258	2.43768e+06	1.94675e+06	1.32588e+06	205125	146246	157519	2.14693e+06	1.76716e+06	1.8362e+06
HILICNeg_86	non-core	-1	7.11	146.045	#N/A	#N/A	0.00468817	0.420003	0.0761375	0.795505	6.62851e+06	6.83572e+06	7.82072e+06	179814	237929	207182	5.65749e+06	6.38491e+06	2.59015e+06
HILICNeg_87	non-core	-1	11.406	146.077	#N/A	#N/A	0.041326	0.0150747	4.54505	4.05245	1.58251e+06	1.29948e+06	1.42189e+06	2.89773e+06	2.97867e+06	1.9789e+06	4.96937e+06	5.1765e+06	4.59621e+06
HILICNeg_88	non-core	-1	11.417	146.503	#N/A	#N/A	0.0403921	0.358074	0.23487	1.13838	2.41943e+06	1.88258e+06	1.39693e+06	202622	157060	177319	2.01206e+06	1.71843e+06	1.77985e+06
HILICNeg_90	non-core	-1	11.034	148.99	#N/A	[M-H]-	0.135586	0.128265	0.450639	1.40296	599892	684823	729107	111703	30942.1	188406	849802	640100	896819
2-Hydroxy-4-(methylthio)butyric acid	non-core	-1	2.27192	149.027	#N/A	#N/A	0.0738974	0.287551	3.43207	1.16251	179593	116270	133076	225334	143885	207379	141116	128101	148369
HILICNeg_92	non-core	-1	8.522	151.025	50.31604:6960 57.49166:6986 59.83306:7391 94.78014:6485 108.01932:336758 126.03011:14157 126.70913:7296 136.01576:7798 146.77295:8211	#N/A	0.569592	0.430246	1.16844	0.618913	7945246	43318184	56723192	45156472	4598116	14469825	13846375	23219600	18502126
HILICNeg_93	non-core	-1	12.855	152.985	#N/A	#N/A	0.0950517	0.0104047	0.760339	0.497795	1.18011e+06	1.01856e+06	1.04343e+06	370276	335163	295656	438189	422733	495736
Orotic acid	non-core	-1	6.555	155.009	#N/A	#N/A	0.0287063	0.432881	0.015419	0.794865	8894019	13856842	11470589	105005	86188	43596	9383700	8296196	5919054
unknown_C6H9NO4_neg	non-core	-1	3.58222	158.045	#N/A	#N/A	0.139655	0.341463	38.92	0.843904	6563245	7242454	6261573	71352080	61558092	148335376	5623021	4483763	4396465
HILICNeg_102	non-core	-1	5.201	160.061	#N/A	#N/A	0.094157	0.271332	1.46099	1.07018	7.10963e+07	6.19299e+07	6.19255e+07	3.97734e+07	3.87435e+07	3.53465e+07	6.53404e+07	6.43471e+07	4.8287e+07
Phosphoenolpyruvic acid	non-core	-1	14.2515	166.975	#N/A	#N/A	0.306398	0.242906	0.855082	0.800953	1.51075e+06	1.62148e+06	1.92775e+06	703554	400983	633025	1.38209e+06	1.26837e+06	829349
HILICNeg_108	non-core	-1	9.537	167.02	#N/A	#N/A	0.327697	0.50232	3.216	0.750799	1862392	5306903	5961524	6491386	1188967	8668813	2286024	2884072	3175814
L-Cysteic acid	non-core	-1	12.1479	167.997	#N/A	#N/A	0.362397	0.0131271	0.817891	0.326059	246518	302501	269134	168427	85731	61736	130698	59195	48736
Dihydroxyacetone phosphate	non-core	-1	12.261	168.99	#N/A	#N/A	0.0110844	0.179147	0.156959	0.779689	2718597	3202471	3057831	294955	199185	135434	2073475	2122898	1780497
Glycerophosphoric acid	non-core	-1	11.9539	171.006	#N/A	#N/A	0.30985	0.40222	0.818672	0.835263	16283273	17552712	26651968	10253338	4913386	6109368	14164889	15651891	12849753
cis-Aconitic acid	non-core	-1	14.5346	173.009	#N/A	#N/A	0.296936	0.28526	1.09945	0.803479	2.09635e+06	1.86376e+06	1.50377e+06	714061	901920	718334	1.28276e+06	1.26415e+06	1.18388e+06
HILICNeg_117	non-core	-1	9.768	175.061	50.15618:6169 51.08667:6073 59.01265:11991 59.8452:7559 68.60125:7190 68.97561:6796 72.13523:6901 79.78297:7363 85.06478:196844 92.55552:6553 113.05981:172176 115.03906:479231 119.69511:6452 130.25392:7665 130.52605:7292 131.07033:27148 157.04999:27987 175.06061:91979	#N/A	0.305356	0.248264	2.35687	1.62929	6.1441e+07	4.43461e+07	4.56086e+07	2.05068e+07	4.84343e+07	5.57658e+07	5.72688e+07	5.43153e+07	9.2452e+07
HILICNeg_121	non-core	-1	9.46	179.04	#N/A	#N/A	0.00736205	0.00453586	0.147461	0.370751	205000240	185807952	198161840	11302908	13073882	9811407	64236156	66313044	54843220
HILICNeg_122	non-core	-1	10.941	179.056	#N/A	[M-H]-	0.0375346	0.596743	0.287756	0.99968	3.56408e+07	4.7795e+07	4.08986e+07	5.66596e+06	4.8261e+06	4.43494e+06	3.9655e+07	3.59854e+07	3.11613e+07
HILICNeg_123	non-core	-1	5.525	180.029	#N/A	[M-H]-	0.0126076	0.00340966	928.876	417.888	15908.4	0	14757.7	3.70845e+06	3.17958e+06	3.35876e+06	3.81022e+06	3.32267e+06	3.25817e+06
HILICNeg_126	non-core	-1	10.186	181.071	#N/A	#N/A	0.0644183	0.0288381	2.07372	4.32188	1.33044e+06	1.48812e+06	1.24166e+06	1.5173e+06	1.30839e+06	752915	5.55671e+06	5.98156e+06	3.59291e+06
3-Phosphoglycerate	non-core	-1	13.75	184.985	#N/A	#N/A	0.00593031	0.397808	0.287201	0.857868	2.71023e+06	2.06761e+06	2.64947e+06	275433	308408	251579	2.37415e+06	1.62578e+06	1.43863e+06
HILICNeg_129	non-core	-1	7.52	185.022	#N/A	#N/A	0.249233	0.864984	2.93755	0.972333	1.2203e+06	2.74811e+06	1.65324e+06	1.37047e+06	1.91241e+06	2.93514e+06	2.88009e+06	1.22218e+06	798184
HILICNeg_131	non-core	-1	11.375	186.025	#N/A	#N/A	0.174622	0.127783	1.42015	1.45599	1488694	628177	1200998	920829	692441	360725	1371744	1453520	1200525
HILICNeg_132	non-core	-1	5.643	188.038	#N/A	#N/A	0.0139522	0.00306276	101.994	34.075	121288	158538	93628.8	6.26874e+06	5.20919e+06	4.67518e+06	3.81966e+06	3.52649e+06	3.58553e+06
N-Acetyl-L-glutamic acid	non-core	-1	11.25	188.056	#N/A	#N/A	0.00547799	0.476	0.0944037	0.957271	129755760	130319744	126733760	3628926	5948816	4067639	103714304	110088304	100278992
HILICNeg_134	non-core	-1	4.265	188.905	56.24233:6592 56.84712:8580 57.18656:6464 92.7298:7002 105.75894:6714 105.90719:6771 111.05541:18101 117.66795:6410 124.04542:6400 143.04543:27162 155.04552:44647 159.74245:7147 178.97694:6346	#N/A	0.0119491	0.00332572	13935.1	825.655	93936.4	145675	31343.3	6.27218e+08	5.07618e+08	4.9746e+08	6.8386e+07	7.13427e+07	5.649e+07
HILICNeg_135	non-core	-1	11.58	188.962	#N/A	#N/A	0.409585	0.558651	1.83729	1.1086	1.09415e+06	1.10771e+06	561504	460634	487739	914205	935422	976938	727605
Citric acid	non-core	-1	14.306	191.019	57.03337:46398 65.12698:6885 66.37735:6442 67.01779:18541 74.54557:6246 81.32649:6452 85.02843:182865 87.00767:331105 111.00774:354475 123.96208:7386 129.01819:10509 149.80365:6710 166.71857:7062	#N/A	0.113787	0.505819	3.22143	0.95925	5.80656e+07	5.59267e+07	6.37427e+07	8.38599e+07	1.05678e+08	4.52879e+07	5.47899e+07	5.25739e+07	3.82568e+07
HILICNeg_139	non-core	-1	10.775	193.035	#N/A	#N/A	0.422924	0.444392	0.433821	0.557405	1161167	5115904	2172488	21919	43720	1310171	1490788	1682986	1019747
D-Gluconic acid	non-core	-1	10.577	195.051	56.39953:7018 57.03347:12887 59.01268:36651 59.08528:6461 71.0127:32219 74.72832:7125 75.00765:457783 75.40747:6393 78.98044:7247 79.8719:6670 79.87492:6720 84.22321:6972 85.02858:39089 87.00766:104356 89.02333:42045 99.00768:175416 100.63615:6934 108.55801:8587 126.1656:7053 129.01843:343946 140.89452:7436 150.81255:7256 153.55524:7376 159.02925:20152 177.03995:21046 194.90529:11180 195.05066:28…	[M-H]-	0.0365674	0.020823	0.0473381	3.76955	1.78625e+08	2.95796e+08	3.05777e+08	4.87391e+06	4.64054e+06	5.19531e+06	7.6429e+08	8.44031e+08	8.86127e+08
HILICNeg_147	non-core	-1	12.272	197.021	#N/A	#N/A	0.0025172	0.525168	0.0482452	0.897299	794797	511257	636172	0	37158	0	497943	401468	554566
HILICNeg_148	non-core	-1	4.912	197.042	#N/A	#N/A	0.182446	0.441086	0.474553	0.765098	5.71284e+06	4.60841e+06	6.59829e+06	1.27437e+06	97890.6	1.62175e+06	5.55795e+06	4.61973e+06	1.2885e+06
HILICNeg_149	non-core	-1	9.289	197.051	#N/A	#N/A	0.0318157	0.0122165	4.52782	0.5468	9.32256e+06	8.46412e+06	1.04265e+07	1.96574e+07	1.72634e+07	1.5148e+07	4.37705e+06	4.0133e+06	4.58361e+06
HILICNeg_159	non-core	-1	9.676	201.087	#N/A	#N/A	0.0923912	0.100932	1.85253	0.768552	9.89384e+06	9.96585e+06	9.89387e+06	7.96684e+06	6.89509e+06	7.24804e+06	7.15708e+06	6.85905e+06	5.51201e+06
HILICNeg_160	non-core	-1	6.159	201.088	#N/A	#N/A	0.0113857	0.00924773	16.8083	9.69467	0	562614	541067	2.7081e+06	2.68288e+06	2.50873e+06	2.85605e+06	3.20582e+06	2.96288e+06
HILICNeg_163	non-core	-1	10.265	204.051	#N/A	#N/A	0.012845	0.480027	0.132937	1.09878	850166	830164	1255234	13938	86609	36708	1162942	758700	819526
HILICNeg_164	non-core	-1	9.159	204.087	#N/A	#N/A	0.141989	0.435168	2.04886	0.887027	2.41408e+06	2.07572e+06	2.18412e+06	1.69067e+06	2.11935e+06	1.48939e+06	1.79374e+06	1.98449e+06	1.27359e+06
HILICNeg_165	non-core	-1	13.725	205.035	#N/A	#N/A	0.349077	0.155828	0.759867	0.536989	4766711	5101718	2855298	1408849	1290492	1252851	2149006	1692053	2007106
HILICNeg_166	non-core	-1	9.477	207.051	#N/A	#N/A	0.00294377	0.147058	0.094009	0.788923	4.23398e+06	3.46535e+06	4.12611e+06	135191	143571	148766	2.37855e+06	2.80002e+06	2.6528e+06
HILICNeg_169	non-core	-1	11.901	211.001	#N/A	#N/A	0.255163	0.400123	1.60363	0.832413	3.30222e+06	2.13696e+06	3.00457e+06	1.43302e+06	2.20529e+06	1.35742e+06	2.61047e+06	2.03461e+06	1.35883e+06
HILICNeg_171	non-core	-1	4.404	211.882	#N/A	#N/A	0.0790701	0.0259555	95.0661	143.848	14899.5	0	19903.4	297445	586731	241831	1.22499e+06	1.13219e+06	1.63874e+06
HILICNeg_172	non-core	-1	14.335	212.989	#N/A	#N/A	0.309225	0.538256	2.02289	0.802432	734879	402107	762703	570797	844983	180788	539230	633992	148343
HILICNeg_173	non-core	-1	10.898	213.016	#N/A	#N/A	0.00344432	0.372241	0.163818	0.905278	2358641	2041947	2142721	221086	114022	127594	1545986	1621318	1807168
HILICNeg_176	non-core	-1	4.286	215.838	#N/A	#N/A	0.0109454	0.00274727	216.193	42.9916	492217	623098	572597	5.40884e+07	4.7515e+07	4.73543e+07	2.24342e+07	2.02829e+07	1.93171e+07
HILICNeg_177	non-core	-1	9.129	216.087	#N/A	#N/A	0.122531	0.365534	0.93073	1.11655	1756188	1029505	1439171	520488	496989	499775	1226145	1381818	1327333
HILICNeg_179	non-core	-1	9.682	217.119	#N/A	#N/A	0.0341123	0.562605	0.0721346	0.855679	852165	471161	467521	0	14403	33283.3	527175	369319	399174
HILICNeg_180	non-core	-1	4.316	217.836	#N/A	#N/A	0.0149009	0.00213022	226.271	43.667	226496	231044	239646	2.22454e+07	1.95552e+07	2.10513e+07	9.12017e+06	8.553e+06	8.18273e+06
HILICNeg_182	non-core	-1	4.689	218.103	#N/A	#N/A	0.0345562	0.689768	3.32093	0.966947	13109487	15422894	10880922	20047482	16798498	17043642	13400161	12651147	7107870
HILICNeg_183	non-core	-1	10.638	223.739	#N/A	#N/A	0.0151857	0.0489313	13.5829	4.11451	1.46253e+06	1.61484e+06	1.45662e+06	9.79472e+06	8.628e+06	7.23777e+06	6.01607e+06	6.66421e+06	3.43553e+06
HILICNeg_187	non-core	-1	4.352	226.83	#N/A	#N/A	0.0233217	0.0277728	#NUM!	#NUM!	0	0	0	9.16804e+06	9.98667e+06	6.7405e+06	4.21792e+06	3.26195e+06	2.17509e+06
HILICNeg_188	non-core	-1	7.412	228.972	#N/A	#N/A	0.44777	0.250593	1.20889	0.599297	1510952	3053386	3143021	2526609	12866	1597176	1910956	1740950	451378
HILICNeg_189	non-core	-1	10.57	229.002	#N/A	#N/A	0.0624708	0.123833	29.7096	14.1617	190816	67383.7	341437	2.51213e+06	3.28223e+06	1.13335e+06	4.26918e+06	1.36966e+06	1.56589e+06
D-Ribose 5-phosphate	non-core	-1	12.575	229.012	#N/A	#N/A	0.313609	0.503282	1.0523	0.91654	3137248	4474872	4405642	2515558	754760	2019297	3261666	3142808	2997147
HILICNeg_193	non-core	-1	7.481	230.97	#N/A	#N/A	0.46557	0.328313	1.24224	0.639575	1408390	3017454	3044938	2503508	17507	1600932	2234262	1576141	514613
HILICNeg_195	non-core	-1	10.673	237.061	#N/A	#N/A	0.0173905	0.0263248	8.32609	3.93361	6.44208e+06	6.25117e+06	6.37222e+06	2.56838e+07	2.25161e+07	1.78683e+07	2.31462e+07	2.51382e+07	1.59227e+07
HILICNeg_196	non-core	-1	10.519	239.017	#N/A	#N/A	0.00990022	0.145926	0.182679	1.34389	875766	637830	743533	12457.5	46982	77737.8	753086	876457	906296
HILICNeg_199	non-core	-1	11.25	241.012	#N/A	#N/A	0.063441	0.0141236	1.4783	0.543964	3197893	2769202	3390661	1944437	1943545	1652349	1661828	1311749	1341497
HILICNeg_200	non-core	-1	10.689	241.012	#N/A	#N/A	0.190178	0.0349423	1.41914	0.613146	6924926	5244759	7597411	3370344	4067424	3380908	3572577	3196088	3406607
Thymidine	non-core	-1	2.86	241.083	#N/A	[M-H]-	0.289536	0.380131	0.931093	0.849397	9925175	7130846	10436034	5487190	3243111	2514666	8485321	6016284	5351046
HILICNeg_202	non-core	-1	10.495	242.052	#N/A	#N/A	0.0227215	0.134917	0.294653	1.29852	7.71142e+06	5.05181e+06	8.28302e+06	822416	865344	735117	7.35067e+06	8.21065e+06	7.29017e+06
HILICNeg_203	non-core	-1	10.878	242.052	#N/A	#N/A	0.0792305	0.0139282	2.15129	4.36367	2.2126e+06	3.60203e+06	2.52957e+06	2.61383e+06	2.24554e+06	2.49983e+06	1.00894e+07	1.13493e+07	9.85339e+06
HILICNeg_205	non-core	-1	10.826	243.027	#N/A	#N/A	0.270924	0.174476	2.67507	1.77376	739885	1255442	449355	826370	532383	1212150	1490465	1122004	1178456
Uridine	non-core	-1	5.944	243.062	56.14906:7439 66.03379:52195 82.0287:91417 83.0126:8883 94.0288:7616 108.0445:11542 110.0237:526079 111.01892:25443 119.33343:7719 120.04469:8803 122.02376:31951 122.91525:7284 124.03954:14322 135.48599:6405 140.03453:31736 152.03458:43625 153.55736:7518 199.31995:7094 200.05621:16913 216.9599:16393	[M-H]-	0.135117	0.24397	0.538763	0.670665	2.03954e+08	1.05848e+08	1.98215e+08	8.16436e+07	3.38464e+07	1.76766e+07	1.50455e+08	8.45833e+07	5.70371e+07
HILICNeg_211	non-core	-1	11.403	245.971	#N/A	#N/A	0.051019	0.438463	0.297676	1.14645	1.0091e+06	1.24847e+06	1.53443e+06	266400	176583	74566.6	1.35271e+06	1.56971e+06	813645
HILICNeg_216	non-core	-1	9.336	249.062	#N/A	#N/A	0.0480002	0.124063	4.6056	2.03725	1119373	988411	1849338	2609089	2887271	1692117	3512236	1974756	1448530
HILICNeg_217	non-core	-1	8.871	249.098	#N/A	#N/A	0.0220957	0.384681	0.0031643	0.821497	2.36499e+06	1.26727e+06	2.24327e+06	0	0	6411.48	1.24841e+06	1.34126e+06	1.41364e+06
HILICNeg_218	non-core	-1	8.887	251.077	#N/A	#N/A	0.0541478	0.571081	1.27635	0.986968	1.87193e+06	1.63437e+06	1.79345e+06	1.08126e+06	959727	752698	1.5882e+06	1.91455e+06	976730
HILICNeg_219	non-core	-1	9.423	251.077	#N/A	#N/A	0.113004	0.0154276	0.837811	0.565927	7.46781e+06	5.8947e+06	7.81997e+06	2.80248e+06	2.4894e+06	1.98107e+06	3.73855e+06	3.49146e+06	2.92087e+06
HILICNeg_223	non-core	-1	8.612	256.059	#N/A	[M-H]-	0.00722938	0.379548	0.308078	1.06414	1.74565e+07	1.36823e+07	1.82299e+07	2.00489e+06	2.16679e+06	1.82211e+06	1.46257e+07	1.36735e+07	1.57056e+07
HILICNeg_227	non-core	-1	8.594	258.057	#N/A	#N/A	0.00407925	0.389364	0.155911	1.07274	5.63333e+06	4.17171e+06	6.02535e+06	243806	362006	313734	4.72754e+06	4.41818e+06	5.05346e+06
D-Glucose 6-phosphate	non-core	-1	13.4068	259.022	#N/A	#N/A	0.0681333	0.512903	0.603642	0.925843	2.62344e+07	1.85866e+07	1.92829e+07	6.80457e+06	5.5615e+06	3.82225e+06	1.7196e+07	1.93747e+07	1.37516e+07
D-Fructose 6-phosphate	non-core	-1	12.743	259.022	#N/A	#N/A	0.0949202	0.466641	1.70822	0.910091	1.35251e+07	1.1222e+07	1.3025e+07	1.29147e+07	8.1445e+06	6.88487e+06	1.079e+07	1.10032e+07	7.50069e+06
HILICNeg_230	non-core	-1	4.428	261.096	#N/A	#N/A	0.0616621	0.11852	3.4382	1.42825	6254374	7079796	5301602	7989634	8409897	8843258	7214426	7457396	7939382
HILICNeg_231	non-core	-1	2.232	261.134	#N/A	#N/A	0.260602	0.319057	1.40237	0.652187	1042845	536323	499554	470961	390924	322651	357298	558810	234720
HILICNeg_232	non-core	-1	4.729	261.96	#N/A	#N/A	0.19562	0.105217	7784.14	471.898	0	0	15697	14502216	2132971	23970066	2757506	2873448	568450
HILICNeg_233	non-core	-1	14.237	264.943	#N/A	#N/A	0.162935	0.263092	0.684441	0.808912	1.28963e+06	1.39266e+06	1.38192e+06	407166	302592	397113	958989	1.14002e+06	715168
HILICNeg_235	non-core	-1	10.706	265.947	#N/A	#N/A	0.163275	0.729503	1.96171	1.07095	1.86047e+06	1.69528e+06	754719	1.22782e+06	1.18198e+06	1.0489e+06	1.83506e+06	1.42535e+06	782711
HILICNeg_237	non-core	-1	7.654	266.089	#N/A	#N/A	0.0371369	0.602302	0.351624	0.973318	4.36675e+06	2.43479e+06	4.39395e+06	1.29256e+06	441716	239510	4.31919e+06	2.96482e+06	2.00958e+06
HILICNeg_239	non-core	-1	10.706	266.99	#N/A	#N/A	0.174367	0.607616	1.72985	0.892531	1.65896e+06	2.2246e+06	1.33738e+06	1.26874e+06	1.25339e+06	1.17976e+06	1.62904e+06	1.55451e+06	887479
HILICNeg_243	non-core	-1	10.712	267.152	#N/A	#N/A	0.237826	0.633309	1.79113	1.01141	1.93871e+06	1.81022e+06	1.49045e+06	1.13821e+06	1.10111e+06	1.37353e+06	1.75964e+06	2.00849e+06	824513
HILICNeg_245	non-core	-1	10.71	268.204	#N/A	#N/A	0.118476	0.739653	2.0179	1.03202	1.80165e+06	1.58841e+06	794183	1.34019e+06	1.17817e+06	997565	1.81409e+06	1.24767e+06	727507
HILICNeg_246	non-core	-1	8.686	269.055	#N/A	#N/A	0.00749347	0.203851	0.326794	0.849461	2.03871e+06	1.64985e+06	2.09081e+06	335525	276192	180794	1.50047e+06	1.52282e+06	1.142e+06
HILICNeg_248	non-core	-1	4.449	270.813	#N/A	#N/A	0.0245424	0.00490641	#NUM!	#NUM!	0	0	0	124962960	100186208	126633056	5009703	4320928	4708842
HILICNeg_250	non-core	-1	3.61	274.094	#N/A	#N/A	0.0098732	0.367838	0.239596	1.17025	42141980	32185916	45374720	3709891	4076577	3451841	35962028	35262960	45334280
HILICNeg_251	non-core	-1	12.013	274.105	#N/A	#N/A	0.0211256	0.190097	0.0249045	0.623272	7.87403e+06	6.98654e+06	5.01515e+06	13272	63351.1	91261.9	5.74194e+06	3.34831e+06	1.88812e+06
HILICNeg_254	non-core	-1	12.264	276.988	#N/A	#N/A	0.0189157	0.383552	0.219077	0.853885	7.25374e+06	4.40833e+06	6.14873e+06	448317	643523	366127	4.5949e+06	4.14361e+06	4.03386e+06
HILICNeg_256	non-core	-1	11.138	278.001	#N/A	#N/A	0.36921	0.511439	1.19295	1.09339	706410	224041	814778	291839	276441	231928	527860	489289	549155
HILICNeg_257	non-core	-1	8.336	278.055	#N/A	#N/A	0.144709	0.242109	0.139338	0.445573	2382212	4690063	2001143	656080	91844	11598	1681768	998605	959362
HILICNeg_259	non-core	-1	8.36	280.052	#N/A	#N/A	0.150527	0.26801	0.0569686	0.389735	688965	1621141	549168	105495	0	0	525580	264318	206113
HILICNeg_260	non-core	-1	6.053	281.036	#N/A	#N/A	0.0288277	0.0166366	0.147641	0.200756	4468696	2535493	3832100	641541	182573	29599	889089	510949	455460
HILICNeg_261	non-core	-1	13.128	282.02	#N/A	[M-H]-	0.595394	0.239505	0.980538	0.611046	1.57636e+06	1.18176e+06	745225	115191	667223	384851	586961	826724	419939
HILICNeg_263	non-core	-1	13.8	282.953	#N/A	#N/A	0.0333375	0.169463	0.291866	0.653797	701553	903667	658046	64684	70080.9	112361	530861	372466	374863
HILICNeg_264	non-core	-1	11.14	284.099	#N/A	#N/A	0.0752658	0.234091	0.0310607	0.550602	806101	1399020	731511	30760	18183	0	497056	496787	411260
HILICNeg_273	non-core	-1	14.529	290.968	#N/A	#N/A	0.131546	0.353213	0.521091	0.752995	824540	571509	450484	69252.9	137141	140310	513756	411053	271815
HILICNeg_274	non-core	-1	10.007	292.016	#N/A	#N/A	0.166435	0.0327257	1.9322	4.33446	933045	671590	971539	592167	755770	552553	2.84846e+06	3.53536e+06	2.96993e+06
HILICNeg_276	non-core	-1	14.22	294.994	#N/A	#N/A	0.0999456	0.506141	2.15243	0.830451	2135896	2658986	1658607	1934338	1975629	1771004	1765162	1226404	1605204
HILICNeg_279	non-core	-1	10.461	298.99	#N/A	[M-H]-	0.0562847	0.0606067	0.501637	1.37771	1.54302e+06	1.20793e+06	1.24398e+06	165658	242734	314495	1.50448e+06	1.54689e+06	1.58097e+06
HILICNeg_281	non-core	-1	4.252	299.875	50.3279:5750 51.58427:7368 53.90731:6183 61.34919:7053 61.93173:6706 76.46703:7504 97.70358:8057 126.35505:7435 126.90411:102630 130.20837:7165 137.58174:6872 227.2164:13292	#N/A	0.01454	0.00334884	25705.2	56.6633	0	0	16767	54632080	51586512	52604916	287257	254011	210468
HILICNeg_282	non-core	-1	8.309	300.009	#N/A	#N/A	0.0192371	0.325996	0.391984	1.11099	5748726	4023290	5628770	965983	811921	683404	4639720	4667217	4996391
HILICNeg_283	non-core	-1	11.842	300.049	#N/A	#N/A	0.270283	0.266853	1.6349	0.763003	3.46891e+06	2.27858e+06	3.4009e+06	4.47904e+06	1.20238e+06	1.42812e+06	2.7321e+06	1.91127e+06	1.32892e+06
HILICNeg_284	non-core	-1	11.662	301.066	#N/A	#N/A	0.00581295	0.171514	0.0965367	0.80215	3.30323e+06	2.11676e+06	2.91778e+06	271526	75713.6	56743.6	2.03096e+06	1.8675e+06	1.72948e+06
HILICNeg_285	non-core	-1	4.725	302.066	#N/A	#N/A	0.0620364	0.552433	0.386219	0.979539	2028606	1505820	1254356	615279	244070	81147	1656970	1149501	1195044
HILICNeg_290	non-core	-1	10.697	305.028	#N/A	#N/A	0.0319079	0.690865	5.29006	1.05739	585463	612912	435264	1.14923e+06	1.16077e+06	1.1418e+06	764961	415832	338593
HILICNeg_291	non-core	-1	11.669	305.996	#N/A	#N/A	0.00802278	0.150815	0.367184	0.823971	4.85301e+06	4.56296e+06	4.51348e+06	611373	694768	678943	3.55675e+06	3.18258e+06	3.01992e+06
HILICNeg_293	non-core	-1	11.231	306.077	#N/A	#N/A	0.571159	0.697752	3.02434	1.68831	5965384	779368	124777	0	7505169	14699	10765139	13288	0
HILICNeg_294	non-core	-1	4.163	306.969	#N/A	#N/A	0.0134093	0.00577504	#NUM!	#NUM!	0	0	0	704830	530367	534946	1.48956e+06	1.65292e+06	1.64588e+06
HILICNeg_296	non-core	-1	4.321	312.87	#N/A	#N/A	0.0137839	0.0017386	#NUM!	#NUM!	0	0	0	6.18652e+07	5.60425e+07	4.40501e+07	9.3438e+06	9.99721e+06	8.81811e+06
HILICNeg_297	non-core	-1	12.06	313.044	#N/A	#N/A	0.0148034	0.196842	0.0211382	0.693675	1.33091e+06	804239	963571	18965.6	0	9712.14	656768	781998	390984
HILICNeg_298	non-core	-1	10.849	313.114	#N/A	#N/A	0.0292128	0.342251	0	0.619283	424974	545908	361352	0	0	0	100727	159035	414995
HILICNeg_301	non-core	-1	4.316	316.739	62.93098:7298 64.97737:9158 65.81864:6960 67.22753:6656 76.33903:6684 90.42822:7137 102.05642:6845 123.95325:8305 144.84041:6802 162.28973:6805 164.00603:8185 191.55229:7112 216.39873:27645 216.41397:72321 216.42561:10186 287.78705:7771 293.05716:6892	#N/A	0.0120247	0.0042782	2731.17	505.76	72182.6	117873	103459	1.21696e+08	1.09724e+08	1.0175e+08	4.70946e+07	4.02912e+07	4.01168e+07
HILICNeg_305	non-core	-1	4.343	318.737	#N/A	#N/A	0.0151685	0.00534223	10183.8	1991.78	7517.47	24274.2	0	5.18901e+07	4.95823e+07	4.4232e+07	2.14282e+07	1.77036e+07	1.74627e+07
HILICNeg_306	non-core	-1	10.886	319.028	#N/A	#N/A	0.00457188	0.571768	0.00899896	1.03028	3.05359e+06	2.69393e+06	3.46083e+06	12924.9	0	17733.6	2.25742e+06	2.11373e+06	3.48768e+06
HILICNeg_308	non-core	-1	11.341	320.011	#N/A	#N/A	0.0476084	0.243379	2.60719	1.21385	1.43999e+07	1.53971e+07	1.58538e+07	2.12067e+07	1.58451e+07	1.35477e+07	1.47213e+07	1.55825e+07	1.64694e+07
HILICNeg_310	non-core	-1	9.089	320.058	#N/A	#N/A	0.419095	0.449984	0.958678	1.00703	12205264	7794139	10208569	5807196	4591738	1986993	10821672	8764261	6328484
HILICNeg_311	non-core	-1	10.424	321.05	#N/A	#N/A	0.399746	0.342923	2.35039	2.8837	456905	993211	558247	0	749538	1012632	283113	1488844	2983050
HILICNeg_312	non-core	-1	9.714	321.13	#N/A	#N/A	0.0254861	0.321158	18.1166	0	66097.3	16197	445295	986714	1.19649e+06	1.21821e+06	0	0	0
HILICNeg_315	non-core	-1	5.648	322.156	#N/A	#N/A	0.0135303	0.0085624	#NUM!	#NUM!	0	0	0	5.88521e+06	4.97655e+06	4.06665e+06	1.89405e+06	2.25008e+06	2.22163e+06
HILICNeg_318	non-core	-1	8.23	324.002	#N/A	#N/A	0.0161895	0.215605	0.272151	0.729155	1299567	1024458	1216541	358365	62123	73755	1044300	733013	451308
HILICNeg_319	non-core	-1	9.153	325.043	#N/A	#N/A	0.273416	0.388662	2.00785	0.657437	3.16091e+06	1.655e+06	3.07493e+06	3.78335e+06	2.89033e+06	547076	3.34568e+06	670755	575675
HILICNeg_320	non-core	-1	10.811	325.125	#N/A	#N/A	0.0124909	0.372245	0.00159747	0.807843	8058070	8794972	7312478	0	0	13686	4464611	4957046	6932402
HILICNeg_321	non-core	-1	11.302	326.11	#N/A	#N/A	0.426866	0.556933	1.10368	0.766403	1.27551e+06	2.69168e+06	1.23149e+06	1.06077e+06	858181	632252	1.02584e+06	1.38205e+06	1.05688e+06
HILICNeg_322	non-core	-1	4.277	327.906	60.01038:6747 65.38969:7014 67.99055:7169 78.35836:6815 88.17626:6063 99.56041:7742 126.90417:86394 127.93592:6596 137.72385:7220 143.47171:6313 155.05804:6543 216.67882:91625 222.40335:8032 251.1566:8116 274.18466:8481	#N/A	0.0153154	0.00574818	15790.1	210.873	0	11981	0	30404762	30154096	29069254	905096	700894	752204
HILICNeg_323	non-core	-1	4.705	329.085	#N/A	#N/A	0.00363939	0.0133093	0.126998	0.424405	26374824	18647286	27912584	2026159	1816572	346311	9805356	7276532	8898670
HILICNeg_324	non-core	-1	10.728	330.068	#N/A	#N/A	0.0288863	0.493468	4.46816	0.981716	1.62438e+06	1.1543e+06	1.63835e+06	2.79572e+06	2.46497e+06	2.5006e+06	1.34371e+06	1.42754e+06	908316
HILICNeg_325	non-core	-1	11.071	331.027	#N/A	#N/A	0.127829	0.405519	1.22955	1.00646	9.30277e+06	8.47806e+06	1.10353e+07	6.30779e+06	5.32024e+06	3.25013e+06	8.44696e+06	8.2874e+06	7.75333e+06
HILICNeg_327	non-core	-1	10.02	334.027	#N/A	#N/A	0.0515579	0.374728	#NUM!	#NUM!	0	0	0	3.74058e+06	7.03599e+06	5.25317e+06	930260	18361.1	53295.7
HILICNeg_328	non-core	-1	4.691	334.071	#N/A	#N/A	0.0128948	0.0255061	0.128043	0.281378	8548211	5328104	9564098	750002	674678	0	3982388	543001	1271598
HILICNeg_330	non-core	-1	11.03	337.126	#N/A	#N/A	0.0176684	0.189384	0.22971	0.784015	1.99433e+07	2.35e+07	2.18054e+07	2.46098e+06	2.29358e+06	1.49426e+06	1.4507e+07	1.56515e+07	1.34381e+07
HILICNeg_331	non-core	-1	2.261	339.079	#N/A	#N/A	0.551823	0.792484	1.41331	0.795563	1.138e+06	794536	513335	449465	1.04275e+06	11034.6	1.72617e+06	0	170040
HILICNeg_332	non-core	-1	9.806	340.126	#N/A	#N/A	0.0263443	0.42265	#NUM!	#NUM!	0	0	0	609916	836573	654607	0	18503.9	0
HILICNeg_334	non-core	-1	14.239	344.03	#N/A	#N/A	0.00437416	0.0670345	0.10188	1.41489	2.0676e+06	1.44433e+06	2.08802e+06	117034	69113.9	60044.2	2.05569e+06	2.41126e+06	2.16371e+06
HILICNeg_337	non-core	-1	10.739	345.05	#N/A	#N/A	0.0295079	0.0287524	23.4612	5.84631	325932	262970	208868	2.28501e+06	2.26443e+06	2.65066e+06	1.59016e+06	1.51038e+06	914076
HILICNeg_339	non-core	-1	4.654	350.071	#N/A	#N/A	0.442044	0.422894	1.04464	0.9393	2454960	1543921	2020064	1499633	1021640	332096	1940460	1612007	1248797
HILICNeg_340	non-core	-1	11.05	353.009	#N/A	#N/A	0.102618	0.0962008	3.01706	1.33917	648985	396133	672280	1.10051e+06	722364	439445	703317	567921	651389
HILICNeg_343	non-core	-1	10.96	361.008	#N/A	#N/A	0.0501427	0.703975	0.0242095	0.997517	843952	1.56469e+06	985618	0	0	29662.4	860011	946989	1.08867e+06
HILICNeg_344	non-core	-1	11.339	361.102	#N/A	[M-H]-	0.137521	0.226826	0.64989	1.36152	1805732	1566433	2093724	663802	372014	447525	3041919	1936817	1430395
HILICNeg_346	non-core	-1	4.277	364.903	#N/A	#N/A	0.0239042	0.0561348	1050.22	28.8581	15650.9	0	0	2.59199e+06	1.61525e+06	1.78583e+06	136273	172504	63689.8
HILICNeg_348	non-core	-1	10.701	366.997	#N/A	#N/A	0.0339045	0.088398	17.1019	5.25819	742525	522935	738702	4.47856e+06	5.65455e+06	3.09595e+06	3.38627e+06	4.18094e+06	1.46969e+06
HILICNeg_349	non-core	-1	12.503	368.052	#N/A	#N/A	0.365418	0.388102	1.07083	1.1932	1.09998e+06	1.18254e+06	1.47628e+06	883732	484999	425071	1.80731e+06	1.37548e+06	710465
HILICNeg_350	non-core	-1	4.341	368.934	#N/A	#N/A	0.0149741	0.302152	#NUM!	#NUM!	0	0	0	1.09877e+06	1.01595e+06	844347	36458.4	0	134044
HILICNeg_351	non-core	-1	10.52	369.017	#N/A	#N/A	0.0298538	0.557307	0	1.23398	429180	599375	801585	0	0	0	434350	443327	977416
HILICNeg_352	non-core	-1	9.75	371.15	#N/A	#N/A	0.177079	0.197846	50.546	0	13213.6	16903.9	0	37956.8	355958	170226	0	0	0
HILICNeg_353	non-core	-1	14.176	371.539	#N/A	#N/A	0.430556	0.642091	0.831202	1.02299	843154	604499	777511	590659	135216	171769	554668	1.02254e+06	359270
HILICNeg_354	non-core	-1	14.302	372.971	#N/A	#N/A	0.158002	0.291899	1.88832	0.814636	901754	908801	874848	652765	866217	482789	806828	587010	489124
HILICNeg_355	non-core	-1	10.525	377.003	#N/A	#N/A	0.00847184	0.451915	0	1.28496	507276	520507	682819	0	0	0	543329	432112	845619
HILICNeg_356	non-core	-1	4.245	378.848	#N/A	#N/A	0.0893892	0.0176868	312.595	257.091	0	39155.6	0	1.40839e+06	1.36682e+06	2.56868e+06	2.79188e+06	2.82638e+06	3.62934e+06
HILICNeg_357	non-core	-1	4.388	380.714	#N/A	#N/A	0.0238684	0.007088	16441	650.849	0	0	15168.8	3.51875e+07	2.5524e+07	3.20503e+07	2.7871e+06	2.3372e+06	2.6917e+06
HILICNeg_358	non-core	-1	6.107	381.007	#N/A	#N/A	0.00567654	0.00868708	0.0756009	0.158221	6.66112e+06	4.21652e+06	6.24914e+06	466425	158441	46685.7	1.23216e+06	653813	452267
HILICNeg_360	non-core	-1	10.622	383.1	#N/A	#N/A	0.024676	0.585611	0	0.899653	2.36654e+06	3.59646e+06	3.11071e+06	0	0	0	1.961e+06	2.16433e+06	2.76735e+06
HILICNeg_361	non-core	-1	11.717	383.973	#N/A	#N/A	0.0772266	0.00972586	2.34419	3.46642	578884	629044	507121	565734	600156	461295	1.77859e+06	1.80797e+06	1.49921e+06
HILICNeg_362	non-core	-1	11.281	388.014	#N/A	#N/A	0.0753594	0.144193	3.90807	1.59056	1.09382e+06	1.07322e+06	1.22354e+06	1.80809e+06	1.43273e+06	1.92e+06	2.19718e+06	1.33251e+06	1.12356e+06
HILICNeg_365	non-core	-1	4.486	394.002	#N/A	#N/A	0.0642515	0.00595544	62.1297	58.1854	454653	176757	285880	1.14984e+07	8.81497e+06	3.56618e+06	1.70386e+07	1.54355e+07	1.2287e+07
HILICNeg_366	non-core	-1	11.43	397.989	#N/A	#N/A	0.048967	0.399832	2.53138	1.16191	3.08298e+06	3.1668e+06	3.26412e+06	4.22862e+06	3.10733e+06	2.82133e+06	2.44155e+06	3.27782e+06	3.538e+06
HILICNeg_367	non-core	-1	10.627	398.099	#N/A	#N/A	0.0488947	0.408697	0	0.756443	2620966	5427656	5103998	0	0	0	2461505	2842284	3147860
HILICNeg_368	non-core	-1	4.483	398.987	#N/A	#N/A	0.151388	0.152604	310.691	104.967	0	28773.2	69712.1	8.23304e+06	5.66794e+06	659221	5.6747e+06	1.7526e+06	1.42489e+06
HILICNeg_369	non-core	-1	10.641	399.095	#N/A	#N/A	0.0486132	0.634835	0	0.864532	7.51165e+06	1.51347e+07	1.65127e+07	0	0	0	8.16911e+06	9.88999e+06	1.05904e+07
HILICNeg_370	non-core	-1	13.633	402.995	#N/A	#N/A	0.583613	0.344071	1.24596	1.5335	1185287	2123790	1463925	0	967823	1209341	1102321	2358675	2687683
HILICNeg_371	non-core	-1	4.731	404.034	#N/A	#N/A	0.44743	0.424188	0.83972	1.00677	3.38027e+06	2.42991e+06	2.50676e+06	2.09108e+06	847756	501329	2.67683e+06	2.14893e+06	2.25838e+06
HILICNeg_372	non-core	-1	11.042	409.004	#N/A	#N/A	0.131855	0.273271	1.2677	1.09832	838899	760533	983835	615338	483551	297561	766141	775124	840242
HILICNeg_373	non-core	-1	9.806	412.004	#N/A	#N/A	0.0761273	0.0683416	842.557	27.0917	0	8544.44	0	673575	1.5888e+06	990495	39473.9	73208	96066.5
HILICNeg_374	non-core	-1	9.157	412.091	#N/A	#N/A	0.43194	0.423728	1.03723	1.13707	1.91349e+06	784392	1.54885e+06	751473	790048	261613	1.69722e+06	1.5259e+06	862800
HILICNeg_375	non-core	-1	9.143	414.088	#N/A	#N/A	0.181747	0.576308	0.551094	1.0759	1.59565e+06	479046	1.22643e+06	335726	279022	123816	1.21524e+06	1.19162e+06	584727
HILICNeg_376	non-core	-1	9.834	416.439	#N/A	#N/A	0.0207876	#N/A	#NUM!	#N/A	0	0	0	1.64012e+06	1.7259e+06	1.24385e+06	0	0	0
HILICNeg_377	non-core	-1	9.154	417.077	#N/A	#N/A	0.334641	0.618937	2.74269	0.614054	492175	21984.3	380271	519940	507725	28321.4	476236	0	24852
HILICNeg_378	non-core	-1	9.866	419.009	#N/A	#N/A	0.465387	0.0912246	1.61898	2.13276	150739	116908	366720	68618.7	107720	172095	533933	275451	329512
HILICNeg_382	non-core	-1	12.008	429.124	#N/A	#N/A	0.0730794	0.5298	1.71118	0.936113	1047347	1009019	815648	752759	693523	580154	816248	860613	625157
HILICNeg_384	non-core	-1	10.801	433.099	#N/A	#N/A	0.0881507	0.228942	3.90538	0.493541	303933	573161	313572	520433	778925	546184	323063	169239	55863
HILICNeg_385	non-core	-1	4.361	433.92	#N/A	#N/A	0.286242	0.0545611	#NUM!	#NUM!	0	0	0	15610.2	254068	43689.7	456626	454000	790494
HILICNeg_387	non-core	-1	4.353	438.807	#N/A	[M-H]-	0.0223275	0.0113001	#NUM!	#NUM!	0	0	0	9.31886e+06	9.9003e+06	1.07633e+07	3.64152e+06	2.59306e+06	3.2022e+06
HILICNeg_388	non-core	-1	10.847	441.037	#N/A	#N/A	0.0285253	0.0339	7.05432	1.41506	3.05828e+06	2.66839e+06	3.46664e+06	1.10114e+07	7.20831e+06	8.31637e+06	3.81049e+06	3.46058e+06	3.6844e+06
HILICNeg_389	non-core	-1	10.581	441.038	#N/A	#N/A	0.0190373	0.109572	10.3871	1.85956	1.02257e+06	614319	830671	3.31497e+06	3.19094e+06	3.33026e+06	1.09223e+06	1.12056e+06	1.57706e+06
HILICNeg_390	non-core	-1	4.41	443.644	#N/A	#N/A	0.013986	0.00308115	#NUM!	#NUM!	0	0	0	2.51204e+07	2.36593e+07	2.16706e+07	1.76178e+07	1.56261e+07	1.48361e+07
HILICNeg_392	non-core	-1	10.79	447.136	#N/A	#N/A	0.233949	0.0124633	1.07206	4.89103	3.93755e+06	4.01873e+06	3.34575e+06	1.43741e+06	1.46936e+06	1.76482e+06	1.7069e+07	1.75708e+07	1.27533e+07
HILICNeg_393	non-core	-1	10.799	454.12	#N/A	#N/A	0.0197812	0.00985868	126.199	68.7694	0	33423	0	621235	639082	700010	903746	668995	590814
HILICNeg_394	non-core	-1	10.695	463.131	57.19331:6424 59.55214:6629 88.414:6554 92.15784:6985 95.06512:6535 107.7326:6577 118.68797:6963 160.73744:6875 167.66228:6637 184.99451:7205 195.0506:75723 207.41388:8178 227.24274:8978 244.63208:7215 267.07272:8804 280.8797:6787	#N/A	0.0269284	0.433495	0.0124396	0.826841	54973636	86420400	78512016	244858	303614	465654	54620080	56959584	44686416
HILICNeg_395	non-core	-1	11.576	465.142	#N/A	#N/A	0.471031	0.705638	1.08436	0.858418	805137	1214120	460002	329995	318648	422508	683420	764900	422140
HILICNeg_396	non-core	-1	10.673	470.121	#N/A	#N/A	0.00678014	0.303383	0	1.21003	1.03376e+06	1.19879e+06	1.23442e+06	0	0	0	1.08705e+06	1.40822e+06	1.06862e+06
HILICNeg_397	non-core	-1	10.682	471.117	#N/A	#N/A	0.00883534	0.530461	0.0104158	1.00099	6044528	7107396	6534398	0	0	72673	5589815	6235383	4992228
HILICNeg_398	non-core	-1	8.964	474.174	#N/A	#N/A	0.0144028	0.344141	0.00857419	1.13712	3.39695e+06	2.01119e+06	3.11357e+06	8664.89	10885.6	8179.54	2.65223e+06	2.54815e+06	2.86827e+06
HILICNeg_400	non-core	-1	10.557	485.113	#N/A	#N/A	0.0253948	0.685665	0	0.920454	533849	829169	855748	0	0	0	410179	449068	836598
HILICNeg_401	non-core	-1	4.278	485.84	#N/A	#N/A	0.0200245	#N/A	#NUM!	#N/A	0	0	0	3501123	3819808	3846551	0	0	0
HILICNeg_403	non-core	-1	11.407	487.366	#N/A	#N/A	0.0587207	0.03075	3.20775	4.18143	1.16241e+06	1.11558e+06	1.23148e+06	2.00107e+06	1.72107e+06	1.01153e+06	3.83912e+06	4.67326e+06	3.89017e+06
HILICNeg_408	non-core	-1	10.712	509.091	#N/A	#N/A	0.094597	0.038061	3.06502	0.545114	943186	824737	1.24969e+06	1.09482e+06	1.41254e+06	1.04015e+06	487931	402973	488799
HILICNeg_409	non-core	-1	10.889	519.014	#N/A	#N/A	0.0240915	0.505911	11.0558	1.06638	261872	297512	397190	1.89923e+06	1.22221e+06	1.31117e+06	265958	286632	304619
HILICNeg_410	non-core	-1	10.548	519.015	#N/A	#N/A	0.039272	0.0346629	12.0063	2.35575	97405	71828.8	59016.1	302445	351407	383734	137833	154455	159757
HILICNeg_411	non-core	-1	9.503	520.076	#N/A	#N/A	0.00454889	0.0126358	0	0.509517	1.47242e+06	1.2885e+06	1.23402e+06	0	0	0	622131	558802	546663
HILICNeg_412	non-core	-1	11.533	522.184	#N/A	#N/A	0.035422	0.0119456	42.5014	5.75984	28916.1	123560	60709.8	1.06164e+06	1.57928e+06	1.11523e+06	348061	387657	338507
HILICNeg_415	non-core	-1	4.674	538.171	#N/A	#N/A	0.618257	0.297632	0.926959	0.521107	3212395	1213749	2276339	2683967	673735	0	2558714	299769	329793
HILICNeg_416	non-core	-1	11.14	540.054	#N/A	#N/A	0.614238	0.685613	1.24198	0.928487	1.83777e+06	1.68284e+06	1.44377e+06	0	1.29775e+06	804360	1.11146e+06	1.82444e+06	991176
HILICNeg_417	non-core	-1	10.736	543.137	#N/A	#N/A	0.0251429	0.699884	7.28234	1.08926	675637	226361	219863	1014819	1051211	1000555	575109	265517	208362
HILICNeg_419	non-core	-1	10.719	558.136	#N/A	#N/A	0.0137191	0.0147409	14.9603	4.61488	497734	641607	527483	3.77465e+06	3.36742e+06	3.15048e+06	2.46751e+06	2.48615e+06	1.68572e+06
UDP-glucose	non-core	-1	13.1108	565.047	#N/A	#N/A	0.459137	0.215764	0.75317	0.684239	7.49083e+06	6.56189e+06	4.80354e+06	570111	2.43117e+06	1.8209e+06	3.8403e+06	4.75129e+06	2.50266e+06
HILICNeg_421	non-core	-1	11.482	568.205	#N/A	#N/A	0.18909	0.0308311	10.2324	3.3669	438335	61012	513204	744777	777985	1812057	1212811	699892	889198
HILICNeg_422	non-core	-1	15.438	579.027	#N/A	#N/A	0.405761	0.502738	1.03966	0.875958	3.69948e+06	2.7932e+06	2.73286e+06	891915	1.70886e+06	947186	2.41099e+06	2.79567e+06	1.68491e+06
UDP-N-acetylglucosamine	non-core	-1	12.2089	606.074	#N/A	#N/A	0.644625	0.205529	0.922205	1.09799	5.09332e+06	4.93013e+06	4.845e+06	415502	2.55307e+06	1.64377e+06	4.77228e+06	4.92407e+06	4.1838e+06
HILICNeg_424	non-core	-1	10.708	613.129	#N/A	#N/A	0.0574821	0.513455	6.68313	1.21637	464582	419066	366580	930485	1125166	1144953	472846	642318	202431
HILICNeg_425	non-core	-1	4.331	648.257	#N/A	#N/A	0.013277	0.00688557	17301.8	1023.35	0	0	7872.73	2.015e+07	1.55306e+07	1.60726e+07	1.98037e+06	2.4356e+06	1.93167e+06
NAD	non-core	-1	11.1056	662.101	#N/A	#N/A	0.567315	0.653432	1.31808	0.967678	8.08109e+06	7.84484e+06	6.20999e+06	46840.8	6.11854e+06	3.84074e+06	4.96005e+06	8.23837e+06	5.02642e+06
Glycine	non-core	1	11.4246	76.0399	#N/A	#N/A	0.366556	0.182137	1.45961	0.724698	4.85175e+06	5.9979e+06	4.86449e+06	3.34491e+06	1.59013e+06	4.0074e+06	2.94151e+06	3.73258e+06	3.0336e+06
HILICPos_0	non-core	1	11.384	80.05	#N/A	#N/A	0.105536	0.242762	1.33692	1.06022	5.05257e+06	4.65506e+06	5.01631e+06	3.48729e+06	2.42974e+06	2.33963e+06	4.44156e+06	4.30477e+06	4.43698e+06
HILICPos_2	non-core	1	11.365	82.0656	#N/A	#N/A	0.0248689	0.0114048	5.02473	4.31171	1.08208e+06	969252	1.01076e+06	2.36438e+06	1.96695e+06	1.9159e+06	3.76892e+06	3.77794e+06	3.6201e+06
HILICPos_5	non-core	1	10.524	85.0291	#N/A	#N/A	0.222181	0.0297654	0.715503	3.59466	6.83723e+06	7.74985e+06	6.41641e+06	2.10016e+06	2.05045e+06	1.92609e+06	2.35004e+07	2.58497e+07	1.5714e+07
HILICPos_6	non-core	1	11.493	86.0491	#N/A	#N/A	0.0322445	0.0203435	4.06573	4.19226	8.42514e+06	7.56482e+06	8.57965e+06	1.76173e+07	1.42471e+07	1.03264e+07	2.70834e+07	2.89647e+07	3.05194e+07
HILICPos_8	non-core	1	7.066	86.0969	#N/A	#N/A	0.0255274	0.0123685	6.00191	3.86186	3.46222e+06	2.98103e+06	3.16423e+06	8.75516e+06	8.05055e+06	6.72382e+06	1.09591e+07	1.08984e+07	9.59202e+06
HILICPos_9	non-core	1	10.714	88.0398	#N/A	#N/A	0.116842	0.0693382	2.08857	1.34106	2.67887e+06	2.37363e+06	2.33184e+06	2.05899e+06	2.22614e+06	1.85248e+06	2.79354e+06	2.88792e+06	2.69954e+06
HILICPos_12	non-core	1	11.365	90.0554	#N/A	#N/A	0.0496527	0.330583	2.5317	0.873307	8.96642e+06	8.97131e+06	9.92866e+06	1.13838e+07	1.04452e+07	7.34785e+06	7.494e+06	7.82608e+06	5.46166e+06
L-Alanine	non-core	1	10.64	90.0555	#N/A	#N/A	0.0134298	0.244992	0.383291	0.919148	1.40766e+08	1.26678e+08	1.46612e+08	1.99861e+07	2.06226e+07	2.10904e+07	1.11448e+08	1.14351e+08	9.67104e+07
HILICPos_13	non-core	1	5.669	93.0578	#N/A	#N/A	0.011236	0.00254266	242.519	86.2959	1.15417e+06	1.18773e+06	1.09138e+06	1.2704e+08	1.08761e+08	1.04469e+08	8.30389e+07	8.50083e+07	8.3241e+07
HILICPos_17	non-core	1	10.698	97.0289	#N/A	#N/A	0.0129403	0.0556076	17.5999	3.84559	2.3636e+06	3.38312e+06	2.32244e+06	2.12971e+07	1.92422e+07	1.83455e+07	1.08799e+07	1.10957e+07	5.21182e+06
HILICPos_20	non-core	1	11.992	98.9846	#N/A	#N/A	0.251294	0.473511	0.809391	0.868868	3.00514e+06	3.22324e+06	4.72755e+06	1.69514e+06	961185	1.09327e+06	2.85176e+06	2.9395e+06	2.28254e+06
HILICPos_21	non-core	1	9.835	98.9846	#N/A	#N/A	0.180123	0.70859	1.18752	1.03542	2.08682e+06	2.50541e+06	2.69235e+06	1.48888e+06	840464	1.225e+06	3.40816e+06	1.97171e+06	1.28153e+06
HILICPos_23	non-core	1	9.476	101.071	#N/A	[M+H]	0.208659	0.0252396	0.935699	0.648463	1.86168e+07	1.70547e+07	1.94758e+07	7.58034e+06	5.73331e+06	7.12996e+06	1.0486e+07	9.61616e+06	1.00999e+07
L-Serine	core	1	11.1262	106.05	#N/A	#N/A	0.0804289	0.288678	0.752141	0.835585	1.31199e+07	8.97041e+06	1.2352e+07	3.59763e+06	3.81118e+06	3.35804e+06	9.0739e+06	8.17202e+06	7.73236e+06
HILICPos_29	non-core	1	10.68	109.029	#N/A	[M+H]	0.0125077	0.101309	19.3967	3.65043	593429	862315	571076	5.7625e+06	5.21527e+06	5.22278e+06	2.76508e+06	2.8149e+06	1.00022e+06
HILICPos_30	non-core	1	12.751	109.029	#N/A	#N/A	0.118196	0.45196	0.776567	0.981773	3.22604e+06	3.04735e+06	3.16457e+06	1.11136e+06	960088	907168	3.04401e+06	2.76641e+06	2.11408e+06
HILICPos_33	non-core	1	8.264	112.051	51.59501:6878 64.65118:7717 69.04552:51794 83.94164:6967 85.57964:7956 90.06509:6778 94.0406:21068 95.02456:188233 111.24319:6602 112.05096:2741754 112.07608:25018 112.09538:24570	#N/A	0.0501317	0.412665	0.499065	0.860411	1.90215e+08	1.29122e+08	1.74576e+08	5.23936e+07	2.881e+07	2.59786e+07	1.56884e+08	1.10383e+08	9.46419e+07
Cytosine	core	1	6.985	112.051	59.97786:6867 60.82067:6624 62.71338:7489 64.1662:7051 67.69991:6318 69.04357:7935 69.04539:39145 70.06585:17065 72.65062:6295 73.40738:6632 81.13174:7327 94.04038:12097 95.02447:135526 95.0608:20047 98.6118:6001 104.28425:6790 108.54111:7925 112.05088:1247958 112.06237:25338 112.07596:69405 112.09532:15547 112.22386:7831	#N/A	0.0832242	0.449368	1.48503	1.14201	83168024	102633864	120938208	62171400	43867024	62812656	110313168	77612944	99996136
L-Proline	core	1	9.046	116.071	58.96291:6606 63.37515:7710 70.06582:957041 76.86774:7114 83.69028:6332 93.15038:7850 98.09678:11419 107.40535:7137 116.07088:417364 116.10722:19239 116.1436:9630	[M+H]	0.0594106	0.163004	0.651687	1.16782	7.08462e+07	5.68187e+07	6.75913e+07	1.63663e+07	1.97421e+07	1.49088e+07	6.32713e+07	6.3553e+07	6.00248e+07
HILICPos_41	non-core	1	11.741	116.071	#N/A	#N/A	0.247721	0.249516	0.739375	0.8149	2.01182e+06	2.23729e+06	2.01035e+06	574137	625076	621107	1.37378e+06	1.64069e+06	1.32688e+06
HILICPos_43	non-core	1	4.72	119.035	#N/A	[M+H]	0.351315	0.635307	1.7524	0.9371	5067594	4353232	4842485	4411430	1555286	3995924	5265880	4145825	2161718
HILICPos_44	non-core	1	5.651	119.061	#N/A	#N/A	0.0106829	0.00286214	183.916	64.1726	3.66964e+06	3.63025e+06	3.56434e+06	3.00592e+08	2.56935e+08	2.5328e+08	1.96085e+08	1.97497e+08	1.96702e+08
L-Threonine	non-core	1	10.007	120.066	#N/A	[M+H]	0.0239029	0.145649	0.509524	0.829924	5.12773e+07	4.01588e+07	5.14662e+07	1.08754e+07	1.06815e+07	7.77145e+06	3.41779e+07	3.35391e+07	3.21527e+07
L-Homoserine	core	1	10.798	120.066	#N/A	#N/A	0.0352317	0.0054125	3.80813	4.40945	1.50548e+07	1.7217e+07	1.70715e+07	2.85054e+07	2.57967e+07	2.09361e+07	5.95206e+07	6.43765e+07	5.57721e+07
HILICPos_48	non-core	1	2.687	123.056	#N/A	#N/A	0.0993176	0.361043	2.77385	1.55072	3818420	2986928	3544240	3738833	3237605	4055071	4505905	2380617	6396162
HILICPos_52	non-core	1	13.456	127.039	#N/A	#N/A	0.0235894	0.0227903	4.41404	4.33962	1.06787e+06	944923	956369	2.18534e+06	1.73344e+06	1.52863e+06	3.42385e+06	3.90506e+06	3.55031e+06
HILICPos_55	non-core	1	8.709	127.05	#N/A	[M+H]	0.185996	0.00975038	1.24666	1.78744	6.36662e+07	5.9733e+07	6.18362e+07	3.60983e+07	2.99283e+07	2.83832e+07	9.25641e+07	1.01803e+08	8.62819e+07
HILICPos_56	non-core	1	13.614	128.071	#N/A	#N/A	0.13557	0.0176024	1.65929	4.71536	1.25515e+06	1.01087e+06	1.22315e+06	783064	746247	744573	4.37475e+06	4.44913e+06	4.9614e+06
HILICPos_61	non-core	1	9.224	130.05	#N/A	#N/A	0.01056	0.038325	869.866	32.8555	272959	151360	49608.6	6.01702e+07	5.24588e+07	5.13575e+07	3.73941e+06	3.60485e+06	5.6212e+06
HILICPos_63	non-core	1	8.696	130.086	#N/A	[M+H]	0.2354	0.173412	1.16931	0.894504	5.8165e+07	4.74036e+07	5.23498e+07	2.52933e+07	2.50983e+07	2.28635e+07	4.19194e+07	4.32981e+07	3.45861e+07
Pipecolic acid	non-core	1	9.00973	130.087	#N/A	#N/A	0.211795	0.152344	1.13873	0.870851	5.53306e+07	4.63103e+07	5.19105e+07	2.39611e+07	2.38405e+07	2.16353e+07	3.98195e+07	4.08005e+07	3.28148e+07
HILICPos_65	non-core	1	10.847	131.047	#N/A	#N/A	0.0530572	0.0121439	2.01393	3.38569	1.87601e+07	1.79342e+07	1.71194e+07	1.99877e+07	1.34508e+07	1.2664e+07	4.92845e+07	5.56421e+07	4.9397e+07
HILICPos_66	non-core	1	10.68	131.082	50.48769:7830 51.71355:7290 56.05029:17515 58.91386:6163 64.98503:7135 69.20801:7955 70.84749:7070 71.10851:7757 85.04838:32644 87.09184:7308 88.03979:54538 90.09663:6481 101.32805:6270 102.05543:9218 104.28409:7134 120.79328:6991 122.97143:6889 124.03101:7116 125.2604:8156	#N/A	0.0984168	0.0190465	2.92139	1.61503	2.53459e+07	2.28717e+07	2.1641e+07	2.83278e+07	3.30989e+07	1.94149e+07	3.0254e+07	3.43042e+07	3.08729e+07
Hydroxyproline	non-core	1	10.6115	132.066	#N/A	#N/A	0.056545	0.195549	2.40258	0.766933	550721	531731	484795	515697	525278	468940	372498	411851	247390
L-Isoleucine	non-core	1	6.646	132.102	#N/A	[M+H]	0.223038	0.43753	1.19563	0.947252	5.68915e+07	4.74722e+07	5.28834e+07	2.24434e+07	2.14832e+07	2.74385e+07	4.30965e+07	3.82784e+07	4.40213e+07
HILICPos_70	non-core	1	6.93	133.032	#N/A	[M+H]	0.118246	0.209235	0.854707	0.854277	6399340	6469266	6265189	2298146	2040260	2182183	4783999	4662597	4435304
L-Ornithine	non-core	1	16.058	133.097	#N/A	#N/A	0.0553341	0.353583	0.559218	1.04345	5.53603e+06	5.02708e+06	5.18974e+06	986024	1.14297e+06	1.227e+06	4.52388e+06	4.49719e+06	4.83555e+06
L-Aspartic acid	non-core	1	11.6926	134.045	#N/A	#N/A	0.0381176	0.12127	0.461266	0.720275	49678812	50483192	43244168	8487434	8748151	8847333	30738808	29656290	27591790
HILICPos_73	non-core	1	10.655	134.081	#N/A	#N/A	0.0159132	0.0165928	9.80576	3.93353	1.21207e+06	1.08574e+06	1.25094e+06	5.6371e+06	4.36566e+06	4.26011e+06	4.07697e+06	4.34728e+06	3.41907e+06
HILICPos_74	non-core	1	9.184	135.03	#N/A	[M+H]	0.0870269	0.44721	1.71785	1.01384	1.99321e+06	1.30695e+06	1.73498e+06	1.66739e+06	1.09861e+06	913278	1.85078e+06	1.34101e+06	1.15028e+06
Adenine	core	1	4.81439	136.062	#N/A	#N/A	0.431842	0.739002	2.17886	0.912209	738169536	664260032	722788992	713691968	144095008	772798848	843665984	670674304	249466160
Hypoxanthine	non-core	1	6.5	137.046	54.02885:6558 64.66826:7173 66.43812:6702 66.65882:8369 68.56494:9059 68.66737:7976 82.74854:9186 94.04059:36141 100.44202:6770 100.46313:7300 105.00483:7799 110.03547:50413 119.03539:36571 137.04591:5445454	[M+H]	0.630305	0.450881	0.825113	0.609862	31619362	209196096	303521856	199413296	15480982	28064924	61409108	110271168	102499816
HILICPos_78	non-core	1	7.718	137.046	68.95043:7337 94.04054:11805 110.03529:14182 116.51958:8000 119.03529:16016 137.04593:2009157 137.10706:7671	#N/A	0.0179946	0.322907	0.1269	0.785428	3.15163e+07	1.78722e+07	2.43736e+07	1.78529e+06	1.39917e+06	749989	2.12759e+07	1.55392e+07	1.24362e+07
Homarine	non-core	1	5.474	138.055	58.51296:7626 59.28382:8368 60.35322:8589 64.58856:9820 67.05493:36585 68.64355:9701 78.03449:84849 82.68173:9827 85.01418:8704 92.04998:22559 93.05785:38234 94.06568:1676143 96.04493:2466386 106.02911:21543 110.06056:43380 114.75317:9923 119.06052:15070 124.03958:800661 124.70473:8769 125.08816:9725 129.09007:8500 135.14133:10284 136.17903:9246 138.05504:12725008	[M+H]	0.0109523	0.00188789	20174	7630.75	4.28657e+06	2.1004e+07	4.24267e+06	9.96598e+10	8.66375e+10	8.2995e+10	6.78848e+10	6.96299e+10	6.64341e+10
HILICPos_89	non-core	1	5.766	139.052	51.5406:14041 52.5068:13416 55.02442:14003 64.78721:13524 73.98441:15938 78.03455:14686 79.03786:37187 85.52947:12081 89.99308:13050 94.06123:32480 94.06184:23130 94.0656:166049 95.06273:37546 95.06901:911615 96.0414:16630 96.04489:450461 97.04195:63849 97.04826:1093771 107.0324:24757 111.06358:36435 114.68067:17770 124.03951:120309 125.03739:29495 125.04285:782365 138.63229:28337 138.93639:16749…	#N/A	0.0107658	0.00183395	13844.2	5043.69	1.39127e+06	1.4516e+06	896541	7.84051e+09	6.84708e+09	6.59306e+09	5.37048e+09	5.49211e+09	5.2431e+09
HILICPos_90	non-core	1	12.034	140.011	#N/A	#N/A	0.0438489	0.0147173	6.01067	3.96513	732806	865564	1.0778e+06	2.83179e+06	1.62471e+06	2.19047e+06	2.94062e+06	3.0527e+06	2.97566e+06
HILICPos_91	non-core	1	9.867	140.011	#N/A	#N/A	0.318178	0.676856	0.937917	1.08066	1.17656e+06	1.78267e+06	1.87474e+06	724195	375129	719168	2.35306e+06	1.21028e+06	1.05375e+06
HILICPos_92	non-core	1	4.746	141.047	53.77457:6850 59.34272:9482 60.73433:7942 84.12716:7883 85.07664:9699 112.08717:19833 123.0239:11434 141.04706:2708402 141.11362:26766	[M+H]	0.457574	0.876862	1.83823	1.02171	9.096e+07	3.16545e+07	5.04822e+07	1.33719e+08	3.05773e+07	6.71644e+06	1.33755e+08	1.87125e+07	1.15278e+07
HILICPos_93	non-core	1	8.016	141.066	53.48712:6576 55.68821:6196 57.41047:6865 59.60603:6457 63.21587:6434 76.0934:7147 78.33517:6424 81.04565:9029 94.67507:6658 95.06089:9464 111.05565:51412 123.05558:54688 124.33475:7917 141.04697:14542 141.06598:103314 141.07396:26167	[M+H]	0.0881802	0.027711	0.683931	2.24909	8.20812e+06	6.35676e+06	7.78179e+06	2.9421e+06	2.03507e+06	1.58602e+06	1.35547e+07	1.30396e+07	1.54643e+07
HILICPos_95	non-core	1	10.263	142.097	#N/A	#N/A	0.0257851	0.29809	0.0294768	0.761176	1.39201e+08	7.28254e+07	1.35178e+08	1.32151e+06	1.56096e+06	1.02735e+06	6.75286e+07	6.88186e+07	8.20556e+07
HILICPos_96	non-core	1	9.536	142.637	#N/A	#N/A	0.0169799	0.0539072	0.157164	0.54141	3.30754e+07	2.37663e+07	2.26967e+07	1.79535e+06	1.79793e+06	1.41339e+06	1.22324e+07	1.26082e+07	1.152e+07
HILICPos_97	non-core	1	9.612	142.921	#N/A	#N/A	0.196113	0.0741554	1.00372	2.02431	2.74124e+06	2.50918e+06	3.26023e+06	1.23084e+06	1.39523e+06	774823	4.41576e+06	6.20897e+06	3.95237e+06
HILICPos_98	non-core	1	9.556	142.955	#N/A	#N/A	0.0106323	0.0184129	0.194694	0.481595	1.51012e+07	1.07836e+07	1.61422e+07	1.10902e+06	1.25038e+06	836923	6.59631e+06	6.26091e+06	4.3214e+06
Ectoine	non-core	1	9.47659	143.082	#N/A	#N/A	0.103221	0.00797168	1.3164	2.18848	1.97052e+10	1.68937e+10	1.86352e+10	1.00942e+10	1.07837e+10	8.08697e+09	3.60841e+10	3.69737e+10	2.95637e+10
HILICPos_105	non-core	1	9.491	143.17	#N/A	#N/A	0.335511	0.298497	0.548551	0.489626	9066606	2584632	14027149	1461153	1940298	1695273	3712870	4344316	2382159
HILICPos_106	non-core	1	9.433	143.206	#N/A	#N/A	0.00672183	0.0113126	0.262225	0.464593	1.58625e+07	1.31414e+07	1.8389e+07	2.0092e+06	1.91344e+06	1.14155e+06	7.00798e+06	7.26922e+06	4.47848e+06
HILICPos_107	non-core	1	9.485	143.527	#N/A	#N/A	0.0132775	0.0508517	0.160158	0.551372	2.8513e+07	2.15565e+07	2.04706e+07	1.44717e+06	1.64281e+06	1.33858e+06	1.13174e+07	1.07935e+07	1.07425e+07
HILICPos_109	non-core	1	10.694	145.05	#N/A	[M+H]	0.136288	0.47229	2.0522	0.770248	4.57692e+06	5.80395e+06	3.63993e+06	3.74867e+06	3.96757e+06	3.85681e+06	3.87223e+06	3.98377e+06	1.63327e+06
HILICPos_110	non-core	1	10.33	146.081	#N/A	#N/A	0.0607013	0.179182	1.42154	0.800279	9.82169e+06	8.64248e+06	8.88655e+06	5.4483e+06	5.57363e+06	4.59736e+06	7.23313e+06	6.75039e+06	4.74957e+06
HILICPos_111	non-core	1	11.358	146.093	#N/A	#N/A	0.406853	0.621117	1.81534	0.911211	3853712	5705232	5431849	3890820	1750582	4901024	5157292	4143007	2598837
(3-Carboxypropyl)trimethylammonium	non-core	1	9.829	146.117	#N/A	[M+H]	0.0602042	0.384662	2.38849	1.00465	2215316	1889054	1889147	1981829	1828981	1859975	1932192	1627394	1559427
L-Glutamine	non-core	1	10.7541	147.077	#N/A	#N/A	0.103123	0.0182891	0.534969	3.51492	7.25745e+08	6.81631e+08	6.59302e+08	5.73308e+07	1.80501e+08	1.47196e+08	1.98821e+09	2.20734e+09	1.95753e+09
L-Lysine	core	1	18.146	147.113	#N/A	[M+H]	0.0490398	0.223633	1.20968	0.925	2.25365e+07	1.82884e+07	2.16812e+07	1.13815e+07	1.08235e+07	7.75217e+06	1.76556e+07	1.77111e+07	1.50653e+07
HILICPos_115	non-core	1	11.501	147.594	#N/A	#N/A	0.0561689	0.513794	0.356612	1.11269	2.83798e+06	1.92831e+06	1.47718e+06	293495	282779	291978	2.11628e+06	1.56212e+06	2.1706e+06
HILICPos_116	non-core	1	11.458	147.929	#N/A	#N/A	0.0132589	0.379554	0.346291	1.06181	1.00509e+06	848123	1.23124e+06	218332	129130	114925	990780	1.03742e+06	747257
L-Glutamic acid	core	1	11.406	148.06	50.46403:6206 56.05021:6984 68.34272:8490 71.61841:6553 83.66648:6774 84.04497:687480 85.02908:11960 87.74522:7243 88.05194:8050 95.3434:7688 102.05537:270969 112.01446:7803 119.00541:6493 130.04999:278650 148.06039:90720	[M+H]	0.0496937	0.00689108	2.56991	4.28549	1.13692e+09	1.12034e+09	1.15194e+09	1.55025e+09	1.03412e+09	9.8081e+08	4.00239e+09	4.2639e+09	3.76593e+09
HILICPos_120	non-core	1	6.499	148.097	#N/A	#N/A	0.440253	0.289503	1.16854	1.62319	6.13213e+06	1.79158e+06	1.94375e+06	1.47877e+06	1.50736e+06	1.35764e+06	4.25591e+06	4.19526e+06	4.76884e+06
HILICPos_121	non-core	1	11.417	148.529	#N/A	#N/A	0.0478877	0.558271	0.351167	1.06998	2.74648e+06	1.84215e+06	1.5225e+06	289718	272169	278123	1.97565e+06	1.53423e+06	1.99402e+06
L-Methionine	non-core	1	6.91737	150.059	#N/A	#N/A	0.103503	0.163408	0.852284	0.849694	27490392	28766374	27932634	10361659	9074712	9413792	20716618	20922208	19157482
N6-Methyladenine	non-core	1	3.42325	150.078	#N/A	#N/A	0.355938	0.618944	0.859259	0.986366	238043	332231	341226	145743	65037.1	115860	262640	312586	196629
HILICPos_123	non-core	1	10.854	151.048	#N/A	[M+H]	0.110589	0.736883	0.585245	0.900404	500201	577232	625798	181773	138318	108504	274086	257962	721538
HILICPos_125	non-core	1	7.648	152.057	#N/A	#N/A	0.0358656	0.586782	0.394508	0.910832	1.47169e+07	8.92147e+06	1.60947e+07	3.62372e+06	1.64696e+06	1.62966e+06	1.43866e+07	9.02047e+06	7.40708e+06
Guanine	non-core	1	8.437	152.057	50.33822:5836 50.3927:6928 50.80593:7000 51.18322:6336 52.7933:6311 56.84669:7307 61.6211:6772 65.94895:6372 67.10377:6666 88.67827:7343 92.15593:6974 109.05116:22894 110.03532:105221 112.20486:7642 116.13816:7959 120.37099:7002 123.26909:7287 123.30002:6988 128.04572:75724 134.04594:13951 135.03026:78680 145.38148:7220 152.05673:1135290	[M+H]	0.441712	0.715826	1.04037	1.0178	40491464	58790940	52941904	39425044	13278000	19844214	62686852	51091808	23479088
HILICPos_127	non-core	1	3.637	154.098	#N/A	#N/A	0.378163	0.536847	0.762338	0.847153	7.47654e+06	4.65827e+06	1.08616e+07	2.36351e+06	2.20631e+06	2.18951e+06	5.98045e+06	4.76244e+06	5.48222e+06
L-Histidine	non-core	1	10.529	156.077	#N/A	#N/A	0.0112083	0.102649	0.309321	0.771534	2.01208e+07	1.99119e+07	2.00494e+07	2.51112e+06	2.81521e+06	2.06699e+06	1.3711e+07	1.39498e+07	1.17748e+07
HILICPos_130	non-core	1	9.159	157.042	65.26609:8600 71.24049:7707 74.93156:15292 94.71522:7247 113.02641:17376 113.10773:41646 115.96471:8539 119.35658:7608 131.03683:10847 138.97018:8144 139.01846:42038 157.02924:121045 157.04198:1688099	#N/A	0.293687	0.346413	2.21306	0.648531	1.64785e+07	9.06589e+06	1.52631e+07	2.56998e+07	1.38121e+07	3.34914e+06	1.65087e+07	3.11572e+06	3.7177e+06
HILICPos_131	non-core	1	8.251	157.097	50.69287:6997 54.94466:6414 55.32527:6173 56.4342:6670 57.01014:7866 57.85853:6948 60.59503:6005 60.92301:6818 64.11874:6493 70.0658:8571 75.18207:7234 77.43037:7377 80.8493:6182 96.08117:10769 99.2421:7512 101.07141:58777 104.53833:8142 104.68991:9904 111.09207:203469 113.10767:154945 115.96449:20251 125.05606:7219 157.09731:1507054	[M+H]	0.186246	0.152407	1.34668	0.799929	19824746	17848170	17345378	9825956	9615755	9747395	12962292	13003669	11407571
HILICPos_132	non-core	1	16.856	158.081	#N/A	#N/A	0.0171683	0.0194789	9.28373	3.53593	1.13107e+06	1.34068e+06	1.02117e+06	4.89017e+06	4.4831e+06	4.01789e+06	3.91868e+06	4.07873e+06	2.66312e+06
HILICPos_133	non-core	1	10.947	158.556	#N/A	#N/A	0.0671505	0.470972	0.368323	0.859991	7.10639e+06	6.56622e+06	4.57814e+06	843402	924136	881742	4.71969e+06	4.43535e+06	4.22925e+06
HILICPos_134	non-core	1	11.189	158.93	#N/A	#N/A	0.00996635	0.3315	0.423609	0.872048	3.16975e+06	2.90324e+06	3.65441e+06	582055	620688	441795	2.82563e+06	2.48791e+06	1.92083e+06
HILICPos_135	non-core	1	11.069	158.971	#N/A	#N/A	0.149543	0.627564	0.480672	0.798941	2113315	1029598	3165187	310946	576518	235606	1606462	2265131	462037
5-Hydroxyectoine	non-core	1	11.0529	159.077	#N/A	#N/A	0.163753	0.44703	0.65045	0.925782	7.38597e+09	7.41544e+09	7.06916e+09	1.75578e+09	2.03296e+09	1.81341e+09	6.28025e+09	6.09629e+09	4.91593e+09
HILICPos_142	non-core	1	11.037	159.18	#N/A	#N/A	0.100615	0.693463	0.413472	0.847777	2080510	907956	2727180	145962	447228	216075	1520746	2107449	491128
HILICPos_143	non-core	1	11.125	159.224	#N/A	#N/A	0.0489829	0.582959	0.541295	0.916614	2.55834e+06	2.36259e+06	3.00245e+06	564619	763062	372313	2.12384e+06	2.67537e+06	1.40002e+06
HILICPos_144	non-core	1	11.095	159.599	#N/A	#N/A	0.0635068	0.458434	0.366566	0.86561	6.56232e+06	6.27736e+06	4.51412e+06	811896	891711	819521	4.44816e+06	4.22855e+06	4.1224e+06
HILICPos_146	non-core	1	10.826	161.092	51.00978:6666 51.80576:8693 53.4291:6198 56.05024:35205 59.91939:6699 74.65627:7365 81.37035:7258 84.04494:25960 89.18747:7128 98.06049:175659 101.06754:12686 101.07138:266721 102.05542:18162 115.08669:36180 125.07123:24640 130.04997:8716 143.08148:67307 144.06558:891732	#N/A	0.0909804	0.204214	0.570894	0.79382	5.39037e+07	5.38895e+07	4.70335e+07	1.01693e+07	1.34844e+07	1.05588e+07	3.74238e+07	3.81456e+07	2.95163e+07
n-methyl glutamine	non-core	1	9.295	161.092	56.05025:2097216 58.02952:115371 60.04514:91725 68.05024:15555 69.03416:26565 72.04507:46879 73.07672:109788 74.02431:33286 74.06077:59334 84.04497:6898463 84.24619:9007 85.02619:10208 85.02901:196335 87.04461:19573 95.01318:23830 97.07651:161160 98.06049:503142 101.07137:435268 102.04969:11045 102.05538:505872 115.08688:1152421 116.0709:521184 116.0756:18824 119.08176:48886 122.60285:11162 125.6…	[M+H]	0.0120774	0.507685	17.143	1.04552	2.45953e+08	2.19086e+08	2.4177e+08	1.7766e+09	1.54719e+09	1.53711e+09	1.95326e+08	1.7163e+08	2.50694e+08
HILICPos_149	non-core	1	5.934	161.092	#N/A	#N/A	0.0159521	0.0207578	0.479941	0.585218	1.7519e+07	1.38689e+07	1.56602e+07	2.93398e+06	3.19538e+06	2.75882e+06	8.16425e+06	8.10498e+06	7.03033e+06
HILICPos_150	non-core	1	17.038	161.129	#N/A	#N/A	0.0172289	0.0135798	8.39975	3.71187	1.03978e+06	1.09034e+06	1.09022e+06	4.18634e+06	3.64718e+06	3.28463e+06	3.58655e+06	3.69676e+06	2.9142e+06
HILICPos_151	non-core	1	9.86	161.543	#N/A	#N/A	0.0269692	0.183673	2699.77	7.96617	688.273	675.094	657.46	611002	751382	735904	7223.31	650.922	5815.09
HILICPos_152	non-core	1	9.84	161.925	#N/A	#N/A	0.0242008	0.25895	6241.67	13.1956	231.114	231.114	231.114	523257	681582	472968	2311	231.114	4912
n-methyl glutamic acid	non-core	1	9.853	162.076	52.65947:7318 54.24166:7841 56.25982:6371 59.03201:6282 60.64181:7084 68.05021:12687 70.06583:154785 72.47549:7261 74.23991:7246 85.02896:98206 98.06051:3361624 116.07092:981399 131.03403:21880 138.99281:41025 144.06558:338156 161.98769:7374 162.07613:101648	[M+H]	0.0268138	0.0233368	350.208	5.81428	7.77083e+06	7.4226e+06	7.36301e+06	8.86144e+08	1.08256e+09	1.06523e+09	3.51202e+07	3.35752e+07	4.15944e+07
HILICPos_154	non-core	1	11.607	162.076	#N/A	#N/A	0.0641964	0.114903	2.98162	0.668589	3.61587e+06	3.46671e+06	2.84062e+06	5.12165e+06	3.11166e+06	3.99369e+06	2.10278e+06	1.96707e+06	1.60848e+06
HILICPos_155	non-core	1	9.796	162.229	#N/A	#N/A	0.0152047	0.404818	3774.34	4.73725	384.178	384.178	384.178	627030	599352	534407	384.178	3842	384.178
HILICPos_156	non-core	1	9.769	162.611	#N/A	#N/A	0.0274577	0.420725	15049.3	17.3141	191.186	191.186	191.186	992395	1090390	1224172	191.186	191.186	7301
HILICPos_157	non-core	1	12.099	162.998	#N/A	#N/A	0.0635786	0.168964	2.13914	1.3731	1.02766e+06	821217	1.03202e+06	1.12548e+06	877673	607960	1.13528e+06	935700	1.24195e+06
HILICPos_163	non-core	1	8.532	166.072	#N/A	#N/A	0.105382	0.47571	1.38994	0.928156	2.30014e+07	2.02524e+07	1.7263e+07	1.47931e+07	1.04e+07	1.00945e+07	1.76446e+07	1.50095e+07	1.51322e+07
HILICPos_164	non-core	1	4.58	166.086	60.58156:7315 64.53271:7221 86.689:6808 93.0705:20134 94.01263:6404 103.05464:82665 107.04951:23743 109.96803:6787 120.08109:1194235 131.04947:21213 140.44695:6783	[M+H]	0.00513742	0.162954	0.244616	0.800916	165006896	143739152	158250448	15173021	14910709	14832930	100397608	101324992	112576328
HILICPos_165	non-core	1	11.264	166.086	#N/A	#N/A	0.57098	0.601516	0.827108	1.83461	83669	184196	473302	97539.7	63269.6	84538	21549.7	90589	933017
HILICPos_166	non-core	1	2.928	167.093	#N/A	#N/A	0.209486	0.358311	2.60131	1.97852	3952553	4126955	7186648	4345519	4095043	6233746	4008954	15679805	5301595
HILICPos_168	non-core	1	11.425	170.042	#N/A	[M+H]	0.0864255	0.448449	1.75817	1.1439	3.5492e+06	3.94314e+06	3.85357e+06	3.24528e+06	2.3685e+06	2.59858e+06	3.24074e+06	3.38938e+06	4.27621e+06
HILICPos_170	non-core	1	11.387	171.076	53.20921:6460 66.06043:8050 72.04514:18236 72.6198:7269 84.04498:431779 89.07152:39887 89.22683:6608 95.08259:6298 102.16595:8508 106.6652:6786 124.04416:7928 125.10743:78681 125.74647:6856 130.05002:636126 153.07393:12262 160.2683:7362 168.53079:7499 171.11285:301874	#N/A	0.047132	0.241309	0.47761	1.04732	5.33127e+07	4.20765e+07	4.64712e+07	1.06799e+07	7.72889e+06	8.84905e+06	4.29009e+07	4.04952e+07	4.18224e+07
HILICPos_173	non-core	1	9.967	173.092	#N/A	#N/A	0.0498067	0.0720551	4.10999	1.33964	1.43049e+06	1.51024e+06	1.43533e+06	2.56799e+06	2.60449e+06	2.13068e+06	1.76966e+06	1.76579e+06	1.4668e+06
HILICPos_174	non-core	1	8.336	174.039	#N/A	#N/A	0.236258	0.20804	1.55964	1.48864	1497497	1014674	2067644	1352538	607705	954732	2416178	2373214	1032416
HILICPos_175	non-core	1	10.559	174.088	#N/A	#N/A	0.379443	0.56607	1.34992	0.85997	4222960	7311904	5502983	2434598	2153697	4114280	4677874	4184595	3792528
HILICPos_176	non-core	1	7.676	175.108	55.98551:7853 55.98695:8306 56.05023:10446 58.02951:36430 58.10687:7033 61.60739:7591 64.9507:7725 68.05022:9366 68.86811:6765 69.03434:13884 70.06581:105422 74.35268:9353 80.05009:7426 83.26295:8236 85.0291:55718 87.04457:10000 88.97835:7066 95.01346:9867 98.06052:3124182 99.16063:8762 105.95736:7156 107.01143:7892 111.09229:8603 115.60281:7729 116.06656:15926 116.07092:224823 124.06165:8878 126…	#N/A	0.0276153	0.115793	41.7073	0.656461	1.67409e+06	1.55535e+06	1.59819e+06	2.27478e+07	2.76701e+07	2.69284e+07	684716	855242	1.09895e+06
HILICPos_177	non-core	1	11.398	175.108	#N/A	#N/A	0.0630733	0.529788	2.15914	0.87412	8291532	9470609	7377626	8050154	6996351	7090242	7106122	7563254	4336732
L-Arginine	core	1	18.943	175.119	#N/A	[M+H]	0.0712598	0.346938	0.625955	0.941458	7.77773e+07	6.95639e+07	7.66188e+07	1.9457e+07	2.15126e+07	1.64629e+07	6.39104e+07	6.34289e+07	5.68486e+07
Citrulline	core	1	11.743	176.103	57.13033:6618 58.29836:6296 59.79189:6712 68.77006:7502 70.0659:119167 102.05065:7763 113.07135:186230 114.05534:34242 115.08701:99879 115.82136:6749 116.07107:36697 122.7114:6541 124.32609:7212 130.09801:7343 131.63469:8245 133.09744:14096 139.6339:6938 141.06602:9642 159.07663:909973 176.1032:78250	[M+H]	0.00335367	0.111297	0.105785	0.775029	6.61835e+07	6.66446e+07	6.84904e+07	2.24187e+06	3.35617e+06	2.85103e+06	4.52996e+07	4.9743e+07	4.14971e+07
HILICPos_180	non-core	1	11.733	178.009	#N/A	[M+H]	0.0543381	0.0104959	4.77967	3.95633	1.47887e+06	1.39388e+06	1.49269e+06	2.69332e+06	3.00056e+06	2.5714e+06	4.92229e+06	4.74548e+06	4.9233e+06
HILICPos_181	non-core	1	12.193	180.087	#N/A	#N/A	0.0581726	0.323202	1.69967	0.874581	1.188e+06	1.21614e+06	1.18196e+06	834745	844406	764886	983358	992003	710069
Glucosamine	non-core	1	10.4797	180.087	#N/A	#N/A	0.0142	0.0391578	11.5763	3.916	1.19191e+06	1.5803e+06	1.19121e+06	6.69486e+06	5.96226e+06	6.09588e+06	5.15848e+06	5.33697e+06	2.98857e+06
L-Tyrosine	core	1	9.097	182.082	#N/A	[M+H]	0.0735619	0.129096	2.02904	1.2594	8.69404e+06	9.02572e+06	9.04757e+06	7.72872e+06	6.85165e+06	6.44892e+06	9.4797e+06	9.26143e+06	9.0138e+06
HILICPos_186	non-core	1	6.43	182.104	#N/A	#N/A	0.615717	0.441162	0.845003	0.604255	3281982	20002740	29051652	19421834	1526815	2897787	5732651	10408617	9990289
HILICPos_189	non-core	1	10.913	185.033	#N/A	[M+H]	0.305452	0.673435	1.23639	0.965774	481903	581233	345284	326240	193889	227149	192016	332057	600600
HILICPos_190	non-core	1	9.836	185.092	#N/A	#N/A	0.0921877	0.422314	3.74379	1.02181	2.67162e+06	2.7245e+06	2.54287e+06	3.58966e+06	3.42527e+06	4.40666e+06	2.48038e+06	2.45345e+06	1.99299e+06
unknown_C7H9NO5_pos	non-core	1	11.847	188.056	#N/A	[M+H]	0.0146232	0.00661423	76.7668	52.8152	53005.8	56886.3	38277.9	1.63577e+06	1.42961e+06	1.53119e+06	2.41423e+06	2.00586e+06	2.26263e+06
HILICPos_193	non-core	1	7.467	188.071	#N/A	[M+H]	0.0608697	0.138919	4.00152	1.12528	4804509	4599462	4832620	7274650	7041136	7854400	4636745	4408587	4508456
HILICPos_195	non-core	1	12.161	190.993	#N/A	#N/A	0.25159	0.568571	2.53418	1.07681	898186	1.38125e+06	1.02023e+06	1.04448e+06	680110	1.49246e+06	1.249e+06	976098	855511
HILICPos_197	non-core	1	4.01	191.049	#N/A	[M+H]	0.240502	0.358731	2.11121	0.659357	7659536	15660747	20674794	26363556	7311264	10664301	10905155	9601218	4616151
HILICPos_198	non-core	1	13.621	191.103	#N/A	[M+H]	0.00666462	0.350322	0.0411991	1.1163	2.54599e+07	1.69605e+07	2.34116e+07	280816	373649	356982	2.02484e+07	1.91794e+07	2.19425e+07
HILICPos_201	non-core	1	5.726	196.108	51.75809:6642 59.06119:25476 59.25867:6581 66.60036:6495 66.62492:7300 71.80388:6038 73.35178:6079 97.35278:6635 98.68143:6891 115.34962:7046 135.4922:8134 138.05508:452908 180.142:8817	#N/A	0.0111051	0.00262664	18862.1	7443.12	35810.4	499258	176905	2.19377e+09	1.96156e+09	1.89217e+09	1.54885e+09	1.60876e+09	1.56117e+09
HILICPos_204	non-core	1	5.763	197.112	#N/A	#N/A	0.01088	0.00271153	3922.02	1488.72	97729.8	151826	121904	2.1966e+08	1.95285e+08	1.88705e+08	1.54762e+08	1.61813e+08	1.5647e+08
HILICPos_205	non-core	1	8.414	197.115	#N/A	#N/A	0.396534	0.682043	0.95399	1.00109	1.44439e+06	1.3788e+06	1.4687e+06	1.01344e+06	394316	456467	1.6259e+06	1.54789e+06	564763
HILICPos_208	non-core	1	13.204	199.033	#N/A	#N/A	0.0177046	0.096911	0.240768	0.652677	1.72175e+06	2.15525e+06	1.90162e+06	170724	182308	193347	1.08536e+06	1.13504e+06	999809
HILICPos_210	non-core	1	11.616	202.071	#N/A	[M+H]	0.0209247	0.400576	0.143168	0.818625	2200666	2902725	2732213	184212	129066	150758	1971974	2303162	1260433
HILICPos_211	non-core	1	10.453	203.053	#N/A	#N/A	0.064633	0.0501545	0.535716	1.46242	5.29157e+06	3.38056e+06	4.85454e+06	706103	868433	1.0646e+06	5.51156e+06	5.43354e+06	5.59695e+06
HILICPos_212	non-core	1	9.816	203.103	#N/A	#N/A	0.209604	0.559555	1.34492	0.967075	9.29823e+06	9.38298e+06	8.28794e+06	4.38039e+06	4.97868e+06	4.8195e+06	7.91305e+06	7.96149e+06	6.40608e+06
HILICPos_213	non-core	1	9.959	204.087	#N/A	#N/A	0.0536405	0.225499	0.790937	0.923034	1.69118e+06	1.57493e+06	1.6517e+06	542808	576148	438504	1.36557e+06	1.27361e+06	1.21142e+06
HILICPos_214	non-core	1	11.726	204.087	#N/A	#N/A	0.251219	0.2551	1.58889	0.795393	1.63373e+06	1.19641e+06	1.59133e+06	1.86501e+06	549538	792835	1.34999e+06	869084	783685
HILICPos_215	non-core	1	10.695	204.087	#N/A	#N/A	0.0160297	0.0716426	20.7515	3.5496	393764	607893	378547	4.33351e+06	3.57288e+06	3.94411e+06	1.64898e+06	1.87683e+06	782788
HILICPos_216	non-core	1	15.787	204.135	#N/A	[M+H]	0.15049	0.27072	1.57876	0.876021	3.19636e+07	2.94131e+07	3.02908e+07	1.67304e+07	2.16428e+07	1.75165e+07	2.54252e+07	2.44043e+07	1.87096e+07
HILICPos_217	non-core	1	11.892	205.082	#N/A	#N/A	0.285365	0.31711	1.25941	1.16308	1.66324e+06	1.97526e+06	1.63198e+06	784775	704988	1.05484e+06	1.87842e+06	1.70912e+06	1.6532e+06
HILICPos_219	non-core	1	10.702	205.13	#N/A	#N/A	0.0102535	0.0589457	0.323898	2.81235	337271	333177	311518	38848.5	60543.1	27351.3	649678	707723	952558
HILICPos_221	non-core	1	9.107	206.103	#N/A	#N/A	0.0300858	0.140095	3.98392	1.2902	1.68445e+06	1.83687e+06	1.48754e+06	3.07277e+06	2.53178e+06	2.57488e+06	2.02538e+06	1.77603e+06	1.72308e+06
HILICPos_223	non-core	1	11.747	212.023	#N/A	#N/A	0.0390228	0.00467355	3.91208	3.22936	344644	387635	327709	586362	565368	528210	1.05965e+06	878770	978736
HILICPos_226	non-core	1	11.27	216.063	51.45436:6985 53.59893:6032 62.06085:154214 62.98753:8127 63.89124:7075 68.48779:6294 72.22716:6674 85.27873:6367 96.01912:6285 99.47187:7084 120.86324:6839 136.23228:7290 142.99648:28534 160.0231:48185 171.96649:6981 173.02112:29357 173.62935:6840 195.88644:7543 198.05299:86614 209.03888:8132 216.06343:98963 216.08612:20121	[M+H]	0.180408	0.225167	2.11651	1.39581	36744292	41870268	39728648	38263936	23171764	38174820	69025600	38823600	35445912
HILICPos_227	non-core	1	11.063	217.13	#N/A	#N/A	0.0121288	0.191861	0.325473	0.783353	3.09524e+07	2.92649e+07	2.56224e+07	2.9308e+06	3.54112e+06	4.08878e+06	1.9522e+07	2.06713e+07	1.70633e+07
HILICPos_228	non-core	1	12.932	219.006	#N/A	[M+H]	0.175514	0.237397	1.14654	1.04497	1.6508e+06	1.5467e+06	1.58382e+06	737116	604417	791371	1.5513e+06	1.44609e+06	1.2556e+06
HILICPos_229	non-core	1	10.515	219.048	#N/A	#N/A	0.0482188	0.622328	0.133154	1.10329	911615	1.54951e+06	1.63979e+06	100069	71427.1	64358.1	1.11133e+06	941529	1.73567e+06
HILICPos_230	non-core	1	11.438	219.098	#N/A	[M+H]	0.114059	0.396753	1.95935	1.05536	13590047	14169518	12107130	10895010	10068674	10325489	12471928	12665408	10769970
HILICPos_231	non-core	1	9.606	219.134	#N/A	#N/A	0.220428	0.512505	0.662506	0.996692	2.317e+06	1.76873e+06	1.47534e+06	431257	507507	481207	1.73245e+06	1.27831e+06	1.67223e+06
HILICPos_233	non-core	1	9.443	220.129	#N/A	#N/A	0.133728	0.0933078	3.6426	0.279034	1.76435e+06	2.41226e+06	1.36533e+06	1.79373e+06	2.92945e+06	2.98768e+06	56731.8	1.24234e+06	52571.2
HILICPos_234	non-core	1	9.489	221.059	#N/A	#N/A	0.00794559	0.0682486	0.349599	0.690599	7166045	5815166	6157448	954735	974979	752380	3826240	3678358	3654849
N-Acetyl-D-glucosamine	non-core	1	8.30757	222.098	#N/A	#N/A	0.103951	0.38925	0.642548	1.06917	2379574	2142352	2257269	618518	608745	526040	1995437	1899973	2203724
HILICPos_235	non-core	1	13.415	225.016	#N/A	#N/A	0.057796	0.220942	0.646303	1.09696	2.33868e+06	1.75518e+06	2.22054e+06	583226	596974	446888	1.99266e+06	1.96116e+06	1.8764e+06
HILICPos_236	non-core	1	10.785	225.054	#N/A	#N/A	0.0472576	0.0408117	0.461548	4.65493	613461	559529	615771	53468.6	138731	97029.6	2.05228e+06	2.13298e+06	2.77169e+06
HILICPos_237	non-core	1	11.442	226.038	#N/A	#N/A	0.0663795	0.470289	1.68823	1.05979	8.23784e+06	8.3055e+06	8.58365e+06	7.30488e+06	5.16182e+06	5.22621e+06	7.39866e+06	6.82608e+06	8.22045e+06
HILICPos_240	non-core	1	6.896	228.098	#N/A	[M+H]	0.115374	0.473741	1.2271	1.07976	10818845	11540665	14596273	7123031	4590604	6440394	12771485	9242231	11729559
HILICPos_243	non-core	1	15.472	232.166	#N/A	[M+H]	0.162265	0.475805	2.01109	0.916488	1.36779e+07	1.31484e+07	1.24333e+07	9.41693e+06	1.15155e+07	9.92742e+06	1.19372e+07	1.08015e+07	8.10638e+06
HILICPos_245	non-core	1	12.135	233.114	#N/A	[M+H]	0.286099	0.106686	0.762099	0.592765	3.75922e+06	4.68014e+06	3.49249e+06	1.88712e+06	1.11665e+06	1.03596e+06	2.15178e+06	2.18983e+06	1.73848e+06
HILICPos_246	non-core	1	12.184	235.093	#N/A	#N/A	0.00635609	0.194292	0.277125	0.834518	1.49345e+06	1.3053e+06	1.27964e+06	117387	169112	141780	1.04454e+06	926805	916363
HILICPos_247	non-core	1	11.16	235.129	#N/A	#N/A	0.00510589	0.181556	0.169422	1.23734	1.27585e+06	844324	1.12881e+06	43209.1	83099.9	71435.6	1.10821e+06	1.26601e+06	1.00664e+06
HILICPos_249	non-core	1	11.148	237.054	#N/A	#N/A	0.0670442	0.420788	0.842485	1.00963	3.39319e+06	2.86706e+06	3.41675e+06	1.16161e+06	1.16485e+06	949239	3.4279e+06	2.59647e+06	2.30778e+06
HILICPos_251	non-core	1	9.048	239.07	#N/A	#N/A	0.0151812	0.355854	184.991	3.82076	35816.6	14367.1	56221.8	2.46451e+06	2.43714e+06	2.45358e+06	43561.7	48178.8	224431
HILICPos_252	non-core	1	9.922	240.053	#N/A	#N/A	0.0412001	0.0817826	396.616	8.28869	10752.1	11990.2	26091	1.84766e+06	2.78249e+06	2.56262e+06	79771.2	94944.6	156115
L-Cystine	non-core	1	11.824	241.032	#N/A	#N/A	0.517547	0.301737	1.12096	0.39997	2165225	5722112	1828051	1603942	80634	2593986	93706	1550507	1626723
HILICPos_254	non-core	1	11.567	241.08	#N/A	#N/A	0.0918977	0.447783	1.71196	1.03478	2.09699e+06	2.22123e+06	1.97497e+06	1.42487e+06	1.50986e+06	1.36985e+06	1.82473e+06	2.01144e+06	1.70675e+06
Cytidine	non-core	1	8.241	244.093	50.41173:5766 50.62591:6655 51.72615:6394 52.70021:6265 63.75482:6909 82.98863:7466 88.26562:6929 91.76866:6777 93.55441:6577 97.35606:7298 112.05087:810783 119.90562:8826 122.48324:6472 142.90726:7205 198.11234:12944	[M+H]	0.0496058	0.386727	0.442702	0.836727	1.04451e+08	6.73357e+07	9.51303e+07	2.60794e+07	1.39277e+07	1.1923e+07	8.35237e+07	5.94113e+07	4.73738e+07
HILICPos_259	non-core	1	16.897	246.181	59.8577:7740 60.04855:6578 66.24175:7838 66.79006:7001 68.58829:6980 72.08154:109702 79.15811:6832 82.22945:6251 84.14558:6694 94.48946:7356 102.57862:6554 158.08133:78856 164.02925:7912 175.10805:168390 217.69942:60388 217.71303:22546 229.15498:320268 240.95132:7847 246.18152:1294612	[M+H]	0.101382	0.270878	1.60096	0.779485	1.24785e+08	1.45127e+08	1.184e+08	8.37019e+07	9.01608e+07	7.72582e+07	1.03683e+08	9.70764e+07	6.11952e+07
HILICPos_260	non-core	1	13.214	246.182	#N/A	#N/A	0.0143942	0.0466887	7.89574	2.58281	5.41932e+06	7.30232e+06	4.94023e+06	2.0426e+07	1.7988e+07	1.87294e+07	1.35166e+07	1.67121e+07	9.29727e+06
HILICPos_261	non-core	1	9.782	247.058	#N/A	[M+H]	0.237033	0.438596	1.68689	1.21868	9.09848e+06	1.36264e+07	1.68117e+07	1.07232e+07	5.6674e+06	1.03446e+07	2.19205e+07	1.06776e+07	9.79672e+06
HILICPos_263	non-core	1	11.899	247.129	#N/A	[M+H]	0.153257	0.0840054	1.75811	0.590576	3.5021e+06	4.08345e+06	3.08052e+06	4.58456e+06	2.02589e+06	2.049e+06	1.87168e+06	2.05549e+06	1.48473e+06
HILICPos_264	non-core	1	14.215	248.077	#N/A	[M+H]	0.00868142	0.155585	0.185944	1.26318	5.01038e+06	3.32469e+06	4.31503e+06	315567	326668	281457	4.34573e+06	4.38426e+06	4.63591e+06
HILICPos_265	non-core	1	12.968	248.125	#N/A	[M+H]	0.302504	0.534955	2.1659	0.996139	1.64457e+06	1.77805e+06	1.49947e+06	634678	1.73075e+06	1.42635e+06	1.43309e+06	1.54676e+06	1.21157e+06
Deoxyadenosine	core	1	3.654	252.109	#N/A	#N/A	0.316267	0.242574	1.08271	1.06639	40954948	34776492	41678956	26420520	14547994	12929305	39392984	33581004	30069012
HILICPos_267	non-core	1	9.655	256.081	#N/A	#N/A	0.384028	0.567837	7.7621	1.30509	685018	884803	1112698	10743033	477470	748413	2002662	900820	308225
HILICPos_268	non-core	1	4.959	257.113	#N/A	[M+H]	0.545	0.151126	1.39617	0.58208	8.04277e+06	3.94485e+06	6.24741e+06	1.106e+07	1.94995e+06	791788	4.78135e+06	2.85049e+06	1.51535e+06
HILICPos_269	non-core	1	7.254	258.181	#N/A	#N/A	0.165922	0.260482	2.04561	0.758273	1.25928e+07	1.0713e+07	1.48841e+07	1.00509e+07	1.46971e+07	6.26331e+06	1.10697e+07	9.4987e+06	4.4237e+06
HILICPos_270	non-core	1	7.348	259.104	#N/A	[M+H]	0.0129486	0.0327281	0.0149709	0.509834	4982824	5030926	7098928	103962	10051	20224	3224782	2766086	1522245
HILICPos_271	non-core	1	11.261	260.028	#N/A	#N/A	0.0341018	0.00703021	20.579	5.85564	308028	325991	356141	2.99156e+06	2.16083e+06	2.9252e+06	1.82524e+06	1.62675e+06	1.48592e+06
HILICPos_273	non-core	1	10.498	260.161	#N/A	#N/A	0.189085	0.483987	1.27288	0.913822	1.32873e+06	1.26656e+06	1.24602e+06	696961	658280	611895	1.1165e+06	1.12937e+06	760935
[truncated: 98 more rows]

## Sheet: S7
Table S7: Results from metabolomics experiments with Cobetia sp. OBi1, dissolved samples only.
[truncated: 112 more rows]

## Sheet: S8
Table S8: Description of samples collected for metabolomics analyses.
[truncated: 154 more rows]

[truncated: 10 more sheets: S9, S10, S11, S12, S13, S14, S15, S16, S17, S18]
